# Supplementary material
Source: publisher figshare collection journal article supplement (https://acs.figshare.com/ndownloader/files/6523323)
Supplement: Supplementary file 1 [file 6523323]

#########################################################################

data_paper

_publ_contact_author
;
  V\'eronique Michelet
;
_publ_contact_author_phone        '00 33 1 44 27 67 42'
_publ_contact_author_fax          '00 33 1 44 27 XX XX'
_publ_contact_author_email        'veronique.michelet@chimie-paristech.fr'
_publ_requested_journal           'Green Chemistry'
_publ_section_title               # Title of paper 
; 
An Efficient Access Towards Fluorenone Derivatives Through Solvent- Free 
Ruthenium Trichloride-Mediated [2+2+2] Cycloadditions
; 

loop_
 _publ_author_name
 _publ_author_address
      'Ye F.'
;  PSL Research University, Chimie ParisTech-CNRS, 
Institut de Recherche de Chimie Paris, 
11 rue P. et M. Curie, 
75005 Paris, 
France.
;
      'Haddad M.'
;  PSL Research University, Chimie ParisTech-CNRS, 
Institut de Recherche de Chimie Paris, 
11 rue P. et M. Curie, 
75005 Paris, 
France.
;
      'Michelet V.'
;  PSL Research University, Chimie ParisTech-CNRS, 
Institut de Recherche de Chimie Paris, 
11 rue P. et M. Curie, 
75005 Paris, 
France.
;
      'Ratovelomanana-Vidal V.'
;  PSL Research University, Chimie ParisTech-CNRS, 
Institut de Recherche de Chimie Paris, 
11 rue P. et M. Curie, 
75005 Paris, 
France.
;

#################### Material relevant to compound X #################### 
 
data_shelx
 
_audit_creation_method            'SHELXL-2014/7'
_shelx_SHELXL_version_number      '2014/7'
_chemical_name_systematic         ?
_chemical_name_common             ?
_chemical_melting_point           ?
_chemical_formula_moiety          'C39 H36 O3'
_chemical_formula_sum
 'C39 H36 O3'
_chemical_formula_weight          552.68
 
loop_
 _atom_type_symbol
 _atom_type_description
 _atom_type_scat_dispersion_real
 _atom_type_scat_dispersion_imag
 _atom_type_scat_source
 'C'  'C'   0.0033   0.0016
 'International Tables Vol C Tables 4.2.6.8 and 6.1.1.4'
 'H'  'H'   0.0000   0.0000
 'International Tables Vol C Tables 4.2.6.8 and 6.1.1.4'
 'O'  'O'   0.0106   0.0060
 'International Tables Vol C Tables 4.2.6.8 and 6.1.1.4'
 
_space_group_crystal_system       monoclinic
_space_group_IT_number            14
_space_group_name_H-M_alt         'P 21/n'
_space_group_name_Hall            '-P 2yn'
 
_shelx_space_group_comment
;
The symmetry employed for this shelxl refinement is uniquely defined
by the following loop, which should always be used as a source of
symmetry information in preference to the above space-group names.
They are only intended as comments.
;
 
loop_
 _space_group_symop_operation_xyz
 'x, y, z'
 '-x+1/2, y+1/2, -z+1/2'
 '-x, -y, -z'
 'x-1/2, -y-1/2, z-1/2'
 
_cell_length_a                    15.9124(4)
_cell_length_b                    10.2339(3)
_cell_length_c                    19.2806(5)
_cell_angle_alpha                 90
_cell_angle_beta                  108.2530(10)
_cell_angle_gamma                 90
_cell_volume                      2981.78(14)
_cell_formula_units_Z             4
_cell_measurement_temperature     200(2)
_cell_measurement_reflns_used     7910
_cell_measurement_theta_min       2.22
_cell_measurement_theta_max       30.17
 
_exptl_crystal_description        prism
_exptl_crystal_colour             yellow
_exptl_crystal_density_meas       ?
_exptl_crystal_density_method     'not measured'
_exptl_crystal_density_diffrn     1.231
_exptl_crystal_F_000              1176
_exptl_transmission_factor_min    ?
_exptl_transmission_factor_max    ?
_exptl_crystal_size_max           0.27
_exptl_crystal_size_mid           0.24
_exptl_crystal_size_min           0.07
_exptl_absorpt_coefficient_mu     0.076
_shelx_estimated_absorpt_T_min    ?
_shelx_estimated_absorpt_T_max    ?
_exptl_absorpt_correction_type    multi-scan
_exptl_absorpt_correction_T_min   0.711
_exptl_absorpt_correction_T_max   0.746
_exptl_absorpt_process_details    
;
SADABS-2012/1 (Bruker,2012) was used for absorption correction.
;
_exptl_absorpt_special_details    ?
_diffrn_ambient_temperature       200(2)
_diffrn_radiation_wavelength      0.71073
_diffrn_radiation_type            MoK\a
_diffrn_source                    'fine-focus sealed tube' 
_diffrn_measurement_device_type   'Bruker APEX-II CCD'
_diffrn_measurement_method        '\f and \w scans'
_diffrn_detector_area_resol_mean  ?
_diffrn_reflns_number             33837
_diffrn_reflns_av_unetI/netI      0.0349
_diffrn_reflns_av_R_equivalents   0.0329
_diffrn_reflns_limit_h_min        -20
_diffrn_reflns_limit_h_max        22
_diffrn_reflns_limit_k_min        -14
_diffrn_reflns_limit_k_max        14
_diffrn_reflns_limit_l_min        -25
_diffrn_reflns_limit_l_max        27
_diffrn_reflns_theta_min          1.998
_diffrn_reflns_theta_max          30.198
_diffrn_reflns_theta_full         25.242
_diffrn_measured_fraction_theta_max   0.998
_diffrn_measured_fraction_theta_full  0.999
_diffrn_reflns_Laue_measured_fraction_max    0.998
_diffrn_reflns_Laue_measured_fraction_full   0.999
_diffrn_reflns_point_group_measured_fraction_max   0.998
_diffrn_reflns_point_group_measured_fraction_full  0.999
_reflns_number_total              8839
_reflns_number_gt                 5842
_reflns_threshold_expression      'I > 2\s(I)'
_reflns_Friedel_coverage          0.000
_reflns_Friedel_fraction_max      .
_reflns_Friedel_fraction_full     .
 
_reflns_special_details
;
 Reflections were merged by SHELXL according to the crystal
 class for the calculation of statistics and refinement.
 
 _reflns_Friedel_fraction is defined as the number of unique
 Friedel pairs measured divided by the number that would be
 possible theoretically, ignoring centric projections and
 systematic absences.
;
 
_computing_data_collection        'Bruker APEX2'
_computing_cell_refinement        'Bruker SAINT'
_computing_data_reduction         'Bruker SAINT'
_computing_structure_solution     'SHELXT-2014 (Sheldrick, 2014)'
_computing_structure_refinement 'SHELXL-2014/7 (Sheldrick, 2014)'
_computing_molecular_graphics     'DIAMOND (Brandenburg, 2006)'
_computing_publication_material   'WinGX publication routines (Farrugia, 2012)'
_refine_special_details           ?
_refine_ls_structure_factor_coef  Fsqd
_refine_ls_matrix_type            full
_refine_ls_weighting_scheme       calc
_refine_ls_weighting_details
'w=1/[\s^2^(Fo^2^)+(0.0615P)^2^+0.3077P] where P=(Fo^2^+2Fc^2^)/3'
_atom_sites_solution_primary      dual
_atom_sites_solution_secondary    difmap
_atom_sites_solution_hydrogens    geom
_refine_ls_hydrogen_treatment     constr
_refine_ls_extinction_method      none
_refine_ls_extinction_coef        .
_refine_ls_number_reflns          8839
_refine_ls_number_parameters      400
_refine_ls_number_restraints      0
_refine_ls_R_factor_all           0.0803
_refine_ls_R_factor_gt            0.0468
_refine_ls_wR_factor_ref          0.1293
_refine_ls_wR_factor_gt           0.1128
_refine_ls_goodness_of_fit_ref    1.024
_refine_ls_restrained_S_all       1.024
_refine_ls_shift/su_max           0.000
_refine_ls_shift/su_mean          0.000
 
loop_
 _atom_site_label
 _atom_site_type_symbol
 _atom_site_fract_x
 _atom_site_fract_y
 _atom_site_fract_z
 _atom_site_U_iso_or_equiv
 _atom_site_adp_type
 _atom_site_occupancy
 _atom_site_site_symmetry_order
 _atom_site_calc_flag
 _atom_site_refinement_flags_posn
 _atom_site_refinement_flags_adp
 _atom_site_refinement_flags_occupancy
 _atom_site_disorder_assembly
 _atom_site_disorder_group
O1 O 0.58643(6) 0.30654(9) 0.42010(5) 0.0412(2) Uani 1 1 d . . . . .
O2 O 0.53664(6) 0.97913(8) 0.29617(4) 0.0370(2) Uani 1 1 d . . . . .
O3 O 0.77589(5) 0.81981(9) 0.45997(4) 0.0388(2) Uani 1 1 d . . . . .
C1 C 0.53797(8) 0.40108(12) 0.41221(6) 0.0322(3) Uani 1 1 d . . . . .
C2 C 0.44389(8) 0.39988(12) 0.41033(6) 0.0320(3) Uani 1 1 d . . . . .
C3 C 0.39288(8) 0.29490(12) 0.41757(7) 0.0376(3) Uani 1 1 d . . . . .
H3 H 0.4165 0.2089 0.4240 0.045 Uiso 1 1 calc R U . . .
C4 C 0.30621(9) 0.31818(13) 0.41517(7) 0.0408(3) Uani 1 1 d . . . . .
H4 H 0.2697 0.2477 0.4201 0.049 Uiso 1 1 calc R U . . .
C5 C 0.27295(8) 0.44385(13) 0.40558(7) 0.0401(3) Uani 1 1 d . . . . .
H5 H 0.2134 0.4583 0.4040 0.048 Uiso 1 1 calc R U . . .
C6 C 0.32406(8) 0.54990(12) 0.39812(6) 0.0354(3) Uani 1 1 d . . . . .
H6 H 0.3001 0.6357 0.3917 0.043 Uiso 1 1 calc R U . . .
C7 C 0.41073(7) 0.52742(12) 0.40033(6) 0.0305(2) Uani 1 1 d . . . . .
C8 C 0.48247(7) 0.61585(11) 0.39455(6) 0.0293(2) Uani 1 1 d . . . . .
C9 C 0.48295(7) 0.74980(11) 0.38409(6) 0.0301(2) Uani 1 1 d . . . . .
C10 C 0.56301(7) 0.80816(12) 0.38266(6) 0.0311(2) Uani 1 1 d . . . . .
C11 C 0.63850(7) 0.73239(12) 0.38885(6) 0.0327(3) Uani 1 1 d . . . . .
C12 C 0.63764(7) 0.59583(12) 0.39916(6) 0.0330(3) Uani 1 1 d . . . . .
C13 C 0.55881(7) 0.54092(11) 0.40184(6) 0.0303(2) Uani 1 1 d . . . . .
C14 C 0.40129(7) 0.83022(11) 0.37378(6) 0.0307(2) Uani 1 1 d . . . . .
C15 C 0.34358(8) 0.85233(14) 0.30421(7) 0.0421(3) Uani 1 1 d . . . . .
H15 H 0.3568 0.8185 0.2629 0.050 Uiso 1 1 calc R U . . .
C16 C 0.26657(9) 0.92372(16) 0.29458(8) 0.0504(4) Uani 1 1 d . . . . .
H16 H 0.2272 0.9379 0.2467 0.060 Uiso 1 1 calc R U . . .
C17 C 0.24696(9) 0.97406(14) 0.35381(8) 0.0460(3) Uani 1 1 d . . . . .
H17 H 0.1944 1.0233 0.3469 0.055 Uiso 1 1 calc R U . . .
C18 C 0.30384(9) 0.95288(13) 0.42310(7) 0.0429(3) Uani 1 1 d . . . . .
H18 H 0.2904 0.9876 0.4641 0.051 Uiso 1 1 calc R U . . .
C19 C 0.38044(8) 0.88121(12) 0.43321(7) 0.0376(3) Uani 1 1 d . . . . .
H19 H 0.4192 0.8667 0.4812 0.045 Uiso 1 1 calc R U . . .
C20 C 0.56364(8) 0.95389(12) 0.37265(6) 0.0341(3) Uani 1 1 d . . . . .
H20A H 0.5224 0.9962 0.3950 0.041 Uiso 1 1 calc R U . . .
H20B H 0.6238 0.9890 0.3963 0.041 Uiso 1 1 calc R U . . .
C21 C 0.50792(10) 1.11003(13) 0.27909(7) 0.0437(3) Uani 1 1 d . . . . .
H21A H 0.5559 1.1714 0.3042 0.052 Uiso 1 1 calc R U . . .
H21B H 0.4561 1.1282 0.2956 0.052 Uiso 1 1 calc R U . . .
C22 C 0.48342(9) 1.12754(12) 0.19807(7) 0.0370(3) Uani 1 1 d . . . . .
C23 C 0.40281(9) 1.18044(14) 0.15853(8) 0.0461(3) Uani 1 1 d . . . . .
H23 H 0.3623 1.2071 0.1830 0.055 Uiso 1 1 calc R U . . .
C24 C 0.38051(10) 1.19487(15) 0.08366(8) 0.0522(4) Uani 1 1 d . . . . .
H24 H 0.3251 1.2323 0.0572 0.063 Uiso 1 1 calc R U . . .
C25 C 0.43742(10) 1.15582(15) 0.04751(8) 0.0508(4) Uani 1 1 d . . . . .
H25 H 0.4216 1.1652 -0.0040 0.061 Uiso 1 1 calc R U . . .
C26 C 0.51795(11) 1.10276(16) 0.08619(8) 0.0541(4) Uani 1 1 d . . . . .
H26 H 0.5577 1.0749 0.0613 0.065 Uiso 1 1 calc R U . . .
C27 C 0.54102(10) 1.08987(15) 0.16105(8) 0.0490(3) Uani 1 1 d . . . . .
H27 H 0.5972 1.0547 0.1875 0.059 Uiso 1 1 calc R U . . .
C28 C 0.72266(8) 0.79690(13) 0.38642(6) 0.0361(3) Uani 1 1 d . . . . .
H28A H 0.7543 0.7394 0.3615 0.043 Uiso 1 1 calc R U . . .
H28B H 0.7091 0.8805 0.3593 0.043 Uiso 1 1 calc R U . . .
C29 C 0.85997(8) 0.87342(14) 0.46533(7) 0.0383(3) Uani 1 1 d . . . . .
H29A H 0.8531 0.9639 0.4462 0.046 Uiso 1 1 calc R U . . .
H29B H 0.8890 0.8206 0.4363 0.046 Uiso 1 1 calc R U . . .
C30 C 0.91511(7) 0.87281(12) 0.54447(6) 0.0322(3) Uani 1 1 d . . . . .
C31 C 0.95414(8) 0.98581(13) 0.57847(7) 0.0406(3) Uani 1 1 d . . . . .
H31 H 0.9478 1.0646 0.5512 0.049 Uiso 1 1 calc R U . . .
C32 C 1.00247(10) 0.98569(16) 0.65191(8) 0.0526(4) Uani 1 1 d . . . . .
H32 H 1.0293 1.0641 0.6748 0.063 Uiso 1 1 calc R U . . .
C33 C 1.01179(9) 0.87272(17) 0.69177(8) 0.0509(4) Uani 1 1 d . . . . .
H33 H 1.0441 0.8733 0.7424 0.061 Uiso 1 1 calc R U . . .
C34 C 0.97451(9) 0.75860(15) 0.65862(8) 0.0478(3) Uani 1 1 d . . . . .
H34 H 0.9817 0.6801 0.6861 0.057 Uiso 1 1 calc R U . . .
C35 C 0.92633(8) 0.75805(13) 0.58501(7) 0.0403(3) Uani 1 1 d . . . . .
H35 H 0.9009 0.6789 0.5621 0.048 Uiso 1 1 calc R U . . .
C36 C 0.71653(8) 0.50941(13) 0.40505(7) 0.0389(3) Uani 1 1 d . . . . .
H36A H 0.7190 0.4391 0.4409 0.047 Uiso 1 1 calc R U . . .
H36B H 0.7713 0.5618 0.4234 0.047 Uiso 1 1 calc R U . . .
C37 C 0.71259(9) 0.44798(15) 0.33152(8) 0.0476(3) Uani 1 1 d . . . . .
H37A H 0.7149 0.5194 0.2976 0.057 Uiso 1 1 calc R U . A 1
H37B H 0.6544 0.4045 0.3114 0.057 Uiso 1 1 calc R U . A 1
C38 C 0.78479(15) 0.3483(2) 0.33176(14) 0.0421(6) Uani 0.749(5) 1 d . . P B 1
H38A H 0.7873 0.3382 0.2814 0.050 Uiso 0.749(5) 1 calc R U P B 1
H38B H 0.8428 0.3822 0.3624 0.050 Uiso 0.749(5) 1 calc R U P B 1
C39 C 0.76908(15) 0.2160(2) 0.36028(14) 0.0580(7) Uani 0.749(5) 1 d . . P B 1
H39A H 0.7621 0.2262 0.4087 0.087 Uiso 0.749(5) 1 calc R U P B 1
H39B H 0.8197 0.1589 0.3638 0.087 Uiso 0.749(5) 1 calc R U P B 1
H39C H 0.7153 0.1773 0.3268 0.087 Uiso 0.749(5) 1 calc R U P B 1
C38B C 0.7744(5) 0.3249(9) 0.3611(4) 0.052(2) Uani 0.251(5) 1 d . . P B 2
H38C H 0.8360 0.3528 0.3865 0.062 Uiso 0.251(5) 1 calc R U P B 2
H38D H 0.7526 0.2733 0.3953 0.062 Uiso 0.251(5) 1 calc R U P B 2
C39B C 0.7699(5) 0.2456(9) 0.2937(4) 0.088(3) Uani 0.251(5) 1 d . . P B 2
H39D H 0.7083 0.2209 0.2686 0.131 Uiso 0.251(5) 1 calc R U P B 2
H39E H 0.8060 0.1666 0.3080 0.131 Uiso 0.251(5) 1 calc R U P B 2
H39F H 0.7924 0.2979 0.2608 0.131 Uiso 0.251(5) 1 calc R U P B 2
 
loop_
 _atom_site_aniso_label
 _atom_site_aniso_U_11
 _atom_site_aniso_U_22
 _atom_site_aniso_U_33
 _atom_site_aniso_U_23
 _atom_site_aniso_U_13
 _atom_site_aniso_U_12
O1 0.0426(5) 0.0351(5) 0.0445(5) 0.0011(4) 0.0118(4) 0.0059(4)
O2 0.0487(5) 0.0298(4) 0.0316(4) -0.0005(3) 0.0113(4) 0.0015(4)
O3 0.0265(4) 0.0540(6) 0.0340(4) -0.0040(4) 0.0068(3) -0.0119(4)
C1 0.0343(6) 0.0334(6) 0.0261(5) -0.0015(5) 0.0053(4) 0.0004(5)
C2 0.0356(6) 0.0315(6) 0.0278(5) -0.0018(4) 0.0085(4) -0.0021(5)
C3 0.0439(7) 0.0312(6) 0.0386(6) -0.0006(5) 0.0143(5) -0.0025(5)
C4 0.0453(7) 0.0359(7) 0.0446(7) -0.0024(5) 0.0192(6) -0.0102(6)
C5 0.0351(6) 0.0430(8) 0.0455(7) -0.0031(6) 0.0173(5) -0.0062(5)
C6 0.0339(6) 0.0340(6) 0.0383(6) -0.0021(5) 0.0112(5) -0.0019(5)
C7 0.0318(6) 0.0324(6) 0.0261(5) -0.0025(4) 0.0072(4) -0.0030(5)
C8 0.0279(5) 0.0318(6) 0.0258(5) -0.0015(4) 0.0050(4) -0.0015(4)
C9 0.0293(6) 0.0315(6) 0.0269(5) -0.0019(4) 0.0051(4) -0.0009(4)
C10 0.0305(6) 0.0330(6) 0.0264(5) -0.0021(4) 0.0040(4) -0.0039(5)
C11 0.0289(6) 0.0380(7) 0.0279(5) -0.0021(5) 0.0043(4) -0.0055(5)
C12 0.0281(6) 0.0384(7) 0.0279(5) -0.0016(5) 0.0023(4) -0.0012(5)
C13 0.0297(5) 0.0316(6) 0.0262(5) -0.0015(4) 0.0038(4) -0.0010(5)
C14 0.0303(6) 0.0271(6) 0.0335(6) 0.0007(4) 0.0081(4) -0.0028(4)
C15 0.0356(6) 0.0563(9) 0.0339(6) 0.0018(6) 0.0103(5) 0.0047(6)
C16 0.0380(7) 0.0663(10) 0.0421(7) 0.0114(7) 0.0057(6) 0.0109(7)
C17 0.0362(7) 0.0445(8) 0.0581(8) 0.0058(6) 0.0161(6) 0.0070(6)
C18 0.0459(7) 0.0393(7) 0.0467(7) -0.0038(6) 0.0191(6) 0.0027(6)
C19 0.0415(7) 0.0357(7) 0.0331(6) -0.0015(5) 0.0083(5) 0.0008(5)
C20 0.0365(6) 0.0333(6) 0.0307(6) -0.0033(5) 0.0078(5) -0.0063(5)
C21 0.0580(8) 0.0319(7) 0.0399(7) -0.0017(5) 0.0134(6) 0.0063(6)
C22 0.0439(7) 0.0265(6) 0.0406(6) -0.0006(5) 0.0130(5) -0.0023(5)
C23 0.0408(7) 0.0453(8) 0.0533(8) 0.0057(6) 0.0163(6) 0.0009(6)
C24 0.0443(8) 0.0547(9) 0.0515(8) 0.0113(7) 0.0061(6) -0.0013(7)
C25 0.0648(10) 0.0443(8) 0.0403(7) 0.0050(6) 0.0120(7) -0.0052(7)
C26 0.0645(10) 0.0553(9) 0.0476(8) 0.0036(7) 0.0250(7) 0.0083(8)
C27 0.0493(8) 0.0504(9) 0.0464(8) 0.0032(6) 0.0136(6) 0.0118(7)
C28 0.0312(6) 0.0431(7) 0.0323(6) -0.0024(5) 0.0077(5) -0.0061(5)
C29 0.0282(6) 0.0471(8) 0.0384(6) 0.0020(5) 0.0088(5) -0.0091(5)
C30 0.0222(5) 0.0364(6) 0.0380(6) 0.0007(5) 0.0094(4) -0.0019(5)
C31 0.0377(7) 0.0359(7) 0.0466(7) -0.0001(6) 0.0106(5) -0.0031(5)
C32 0.0485(8) 0.0525(9) 0.0495(8) -0.0126(7) 0.0046(6) -0.0114(7)
C33 0.0380(7) 0.0702(11) 0.0387(7) -0.0001(7) 0.0039(5) 0.0003(7)
C34 0.0444(7) 0.0501(9) 0.0479(8) 0.0145(6) 0.0132(6) 0.0072(6)
C35 0.0378(7) 0.0367(7) 0.0459(7) 0.0011(6) 0.0123(5) -0.0038(5)
C36 0.0269(6) 0.0418(7) 0.0435(7) 0.0013(6) 0.0047(5) 0.0017(5)
C37 0.0373(7) 0.0472(8) 0.0541(8) -0.0056(6) 0.0084(6) 0.0060(6)
C38 0.0407(11) 0.0495(13) 0.0402(13) -0.0017(10) 0.0185(9) 0.0079(8)
C39 0.0581(13) 0.0406(13) 0.0816(18) -0.0047(11) 0.0313(11) 0.0028(10)
C38B 0.048(4) 0.078(6) 0.033(4) -0.015(4) 0.017(3) -0.001(3)
C39B 0.076(5) 0.117(8) 0.067(5) -0.049(5) 0.018(4) 0.014(5)
 
_geom_special_details
;
 All esds (except the esd in the dihedral angle between two l.s. planes)
 are estimated using the full covariance matrix.  The cell esds are taken
 into account individually in the estimation of esds in distances, angles
 and torsion angles; correlations between esds in cell parameters are only
 used when they are defined by crystal symmetry.  An approximate (isotropic)
 treatment of cell esds is used for estimating esds involving l.s. planes.
;
 
loop_
 _geom_bond_atom_site_label_1
 _geom_bond_atom_site_label_2
 _geom_bond_distance
 _geom_bond_site_symmetry_2
 _geom_bond_publ_flag
O1 C1 1.2167(14) . ?
O2 C21 1.4204(15) . ?
O2 C20 1.4243(13) . ?
O3 C29 1.4196(14) . ?
O3 C28 1.4251(13) . ?
C1 C2 1.4862(17) . ?
C1 C13 1.4965(17) . ?
C2 C3 1.3797(17) . ?
C2 C7 1.3984(17) . ?
C3 C4 1.3860(19) . ?
C3 H3 0.9500 . ?
C4 C5 1.3810(19) . ?
C4 H4 0.9500 . ?
C5 C6 1.3905(17) . ?
C5 H5 0.9500 . ?
C6 C7 1.3855(17) . ?
C6 H6 0.9500 . ?
C7 C8 1.4880(16) . ?
C8 C9 1.3860(16) . ?
C8 C13 1.4059(16) . ?
C9 C10 1.4151(16) . ?
C9 C14 1.4978(16) . ?
C10 C11 1.4031(17) . ?
C10 C20 1.5043(17) . ?
C11 C12 1.4123(18) . ?
C11 C28 1.5069(16) . ?
C12 C13 1.3902(17) . ?
C12 C36 1.5105(17) . ?
C14 C15 1.3864(16) . ?
C14 C19 1.3904(17) . ?
C15 C16 1.3882(19) . ?
C15 H15 0.9500 . ?
C16 C17 1.375(2) . ?
C16 H16 0.9500 . ?
C17 C18 1.3760(18) . ?
C17 H17 0.9500 . ?
C18 C19 1.3831(18) . ?
C18 H18 0.9500 . ?
C19 H19 0.9500 . ?
C20 H20A 0.9900 . ?
C20 H20B 0.9900 . ?
C21 C22 1.4976(17) . ?
C21 H21A 0.9900 . ?
C21 H21B 0.9900 . ?
C22 C27 1.3813(19) . ?
C22 C23 1.3809(18) . ?
C23 C24 1.382(2) . ?
C23 H23 0.9500 . ?
C24 C25 1.364(2) . ?
C24 H24 0.9500 . ?
C25 C26 1.376(2) . ?
C25 H25 0.9500 . ?
C26 C27 1.380(2) . ?
C26 H26 0.9500 . ?
C27 H27 0.9500 . ?
C28 H28A 0.9900 . ?
C28 H28B 0.9900 . ?
C29 C30 1.5032(16) . ?
C29 H29A 0.9900 . ?
C29 H29B 0.9900 . ?
C30 C31 1.3775(17) . ?
C30 C35 1.3910(18) . ?
C31 C32 1.3836(18) . ?
C31 H31 0.9500 . ?
C32 C33 1.370(2) . ?
C32 H32 0.9500 . ?
C33 C34 1.374(2) . ?
C33 H33 0.9500 . ?
C34 C35 1.3858(19) . ?
C34 H34 0.9500 . ?
C35 H35 0.9500 . ?
C36 C37 1.5339(19) . ?
C36 H36A 0.9900 . ?
C36 H36B 0.9900 . ?
C37 C38 1.535(3) . ?
C37 C38B 1.590(9) . ?
C37 H37A 0.9900 . ?
C37 H37B 0.9900 . ?
C38 C39 1.511(3) . ?
C38 H38A 0.9900 . ?
C38 H38B 0.9900 . ?
C39 H39A 0.9800 . ?
C39 H39B 0.9800 . ?
C39 H39C 0.9800 . ?
C38B C39B 1.515(10) . ?
C38B H38C 0.9900 . ?
C38B H38D 0.9900 . ?
C39B H39D 0.9800 . ?
C39B H39E 0.9800 . ?
C39B H39F 0.9800 . ?
 
loop_
 _geom_angle_atom_site_label_1
 _geom_angle_atom_site_label_2
 _geom_angle_atom_site_label_3
 _geom_angle
 _geom_angle_site_symmetry_1
 _geom_angle_site_symmetry_3
 _geom_angle_publ_flag
C21 O2 C20 112.45(9) . . ?
C29 O3 C28 112.88(9) . . ?
O1 C1 C2 126.20(11) . . ?
O1 C1 C13 128.23(11) . . ?
C2 C1 C13 105.56(10) . . ?
C3 C2 C7 122.16(11) . . ?
C3 C2 C1 128.61(11) . . ?
C7 C2 C1 109.23(10) . . ?
C2 C3 C4 118.26(12) . . ?
C2 C3 H3 120.9 . . ?
C4 C3 H3 120.9 . . ?
C5 C4 C3 120.01(12) . . ?
C5 C4 H4 120.0 . . ?
C3 C4 H4 120.0 . . ?
C4 C5 C6 121.92(12) . . ?
C4 C5 H5 119.0 . . ?
C6 C5 H5 119.0 . . ?
C7 C6 C5 118.43(12) . . ?
C7 C6 H6 120.8 . . ?
C5 C6 H6 120.8 . . ?
C6 C7 C2 119.22(11) . . ?
C6 C7 C8 132.55(11) . . ?
C2 C7 C8 108.22(10) . . ?
C9 C8 C13 120.67(11) . . ?
C9 C8 C7 130.67(11) . . ?
C13 C8 C7 108.66(10) . . ?
C8 C9 C10 117.79(10) . . ?
C8 C9 C14 121.25(10) . . ?
C10 C9 C14 120.96(10) . . ?
C11 C10 C9 121.14(11) . . ?
C11 C10 C20 121.26(10) . . ?
C9 C10 C20 117.59(10) . . ?
C10 C11 C12 120.87(11) . . ?
C10 C11 C28 120.05(11) . . ?
C12 C11 C28 119.06(11) . . ?
C13 C12 C11 116.99(11) . . ?
C13 C12 C36 119.93(11) . . ?
C11 C12 C36 123.06(11) . . ?
C12 C13 C8 122.50(11) . . ?
C12 C13 C1 129.18(11) . . ?
C8 C13 C1 108.32(10) . . ?
C15 C14 C19 118.64(11) . . ?
C15 C14 C9 120.15(11) . . ?
C19 C14 C9 121.19(10) . . ?
C14 C15 C16 120.31(12) . . ?
C14 C15 H15 119.8 . . ?
C16 C15 H15 119.8 . . ?
C17 C16 C15 120.44(12) . . ?
C17 C16 H16 119.8 . . ?
C15 C16 H16 119.8 . . ?
C16 C17 C18 119.74(13) . . ?
C16 C17 H17 120.1 . . ?
C18 C17 H17 120.1 . . ?
C17 C18 C19 120.19(12) . . ?
C17 C18 H18 119.9 . . ?
C19 C18 H18 119.9 . . ?
C18 C19 C14 120.67(11) . . ?
C18 C19 H19 119.7 . . ?
C14 C19 H19 119.7 . . ?
O2 C20 C10 107.49(9) . . ?
O2 C20 H20A 110.2 . . ?
C10 C20 H20A 110.2 . . ?
O2 C20 H20B 110.2 . . ?
C10 C20 H20B 110.2 . . ?
H20A C20 H20B 108.5 . . ?
O2 C21 C22 108.33(10) . . ?
O2 C21 H21A 110.0 . . ?
C22 C21 H21A 110.0 . . ?
O2 C21 H21B 110.0 . . ?
C22 C21 H21B 110.0 . . ?
H21A C21 H21B 108.4 . . ?
C27 C22 C23 118.43(12) . . ?
C27 C22 C21 120.50(12) . . ?
C23 C22 C21 121.07(12) . . ?
C22 C23 C24 120.57(14) . . ?
C22 C23 H23 119.7 . . ?
C24 C23 H23 119.7 . . ?
C25 C24 C23 120.52(14) . . ?
C25 C24 H24 119.7 . . ?
C23 C24 H24 119.7 . . ?
C24 C25 C26 119.55(14) . . ?
C24 C25 H25 120.2 . . ?
C26 C25 H25 120.2 . . ?
C25 C26 C27 120.13(15) . . ?
C25 C26 H26 119.9 . . ?
C27 C26 H26 119.9 . . ?
C26 C27 C22 120.78(13) . . ?
C26 C27 H27 119.6 . . ?
C22 C27 H27 119.6 . . ?
O3 C28 C11 107.34(9) . . ?
O3 C28 H28A 110.2 . . ?
C11 C28 H28A 110.2 . . ?
O3 C28 H28B 110.2 . . ?
C11 C28 H28B 110.2 . . ?
H28A C28 H28B 108.5 . . ?
O3 C29 C30 108.03(10) . . ?
O3 C29 H29A 110.1 . . ?
C30 C29 H29A 110.1 . . ?
O3 C29 H29B 110.1 . . ?
C30 C29 H29B 110.1 . . ?
H29A C29 H29B 108.4 . . ?
C31 C30 C35 118.82(11) . . ?
C31 C30 C29 120.82(11) . . ?
C35 C30 C29 120.35(11) . . ?
C30 C31 C32 120.63(13) . . ?
C30 C31 H31 119.7 . . ?
C32 C31 H31 119.7 . . ?
C33 C32 C31 120.17(13) . . ?
C33 C32 H32 119.9 . . ?
C31 C32 H32 119.9 . . ?
C32 C33 C34 120.08(12) . . ?
C32 C33 H33 120.0 . . ?
C34 C33 H33 120.0 . . ?
C33 C34 C35 119.98(13) . . ?
C33 C34 H34 120.0 . . ?
C35 C34 H34 120.0 . . ?
C34 C35 C30 120.30(12) . . ?
C34 C35 H35 119.8 . . ?
C30 C35 H35 119.8 . . ?
C12 C36 C37 112.21(10) . . ?
C12 C36 H36A 109.2 . . ?
C37 C36 H36A 109.2 . . ?
C12 C36 H36B 109.2 . . ?
C37 C36 H36B 109.2 . . ?
H36A C36 H36B 107.9 . . ?
C36 C37 C38 117.10(14) . . ?
C36 C37 C38B 98.7(3) . . ?
C36 C37 H37A 108.0 . . ?
C38 C37 H37A 108.0 . . ?
C36 C37 H37B 108.0 . . ?
C38 C37 H37B 108.0 . . ?
H37A C37 H37B 107.3 . . ?
C39 C38 C37 112.8(2) . . ?
C39 C38 H38A 109.0 . . ?
C37 C38 H38A 109.0 . . ?
C39 C38 H38B 109.0 . . ?
C37 C38 H38B 109.0 . . ?
H38A C38 H38B 107.8 . . ?
C38 C39 H39A 109.5 . . ?
C38 C39 H39B 109.5 . . ?
H39A C39 H39B 109.5 . . ?
C38 C39 H39C 109.5 . . ?
H39A C39 H39C 109.5 . . ?
H39B C39 H39C 109.5 . . ?
C39B C38B C37 105.0(6) . . ?
C39B C38B H38C 110.7 . . ?
C37 C38B H38C 110.7 . . ?
C39B C38B H38D 110.7 . . ?
C37 C38B H38D 110.7 . . ?
H38C C38B H38D 108.8 . . ?
C38B C39B H39D 109.5 . . ?
C38B C39B H39E 109.5 . . ?
H39D C39B H39E 109.5 . . ?
C38B C39B H39F 109.5 . . ?
H39D C39B H39F 109.5 . . ?
H39E C39B H39F 109.5 . . ?
 
_refine_diff_density_max    0.263
_refine_diff_density_min   -0.199
_refine_diff_density_rms    0.038
 
_shelx_res_file
;
 
    shelx.res created by SHELXL-2014/7
 
TITL yf284_0m.res in P2(1)/n
CELL  0.71073  15.9124  10.2339  19.2806   90.000  108.253   90.000
ZERR     4.00   0.0004   0.0003   0.0005    0.000    0.001    0.000
LATT   1
SYMM  1/2 - X, 1/2 + Y, 1/2 - Z
SFAC  C    H    O
UNIT  156 144 12
MERG   2
OMIT    -1   0   1
OMIT   -16   1   2
OMIT    -7  10   2
OMIT   -13   3   2
FMAP   2
PLAN   20
ACTA
BOND   $H
L.S.  10
TEMP   -73.00
WGHT    0.061500    0.307700
FVAR       0.13243   0.74932
O1    3    0.586430    0.306543    0.420097    11.00000    0.04262    0.03512 =
         0.04450    0.00112    0.01182    0.00595
O2    3    0.536645    0.979128    0.296175    11.00000    0.04869    0.02977 =
         0.03158   -0.00049    0.01133    0.00153
O3    3    0.775886    0.819806    0.459972    11.00000    0.02653    0.05395 =
         0.03400   -0.00401    0.00685   -0.01194
C1    1    0.537971    0.401078    0.412207    11.00000    0.03427    0.03340 =
         0.02612   -0.00150    0.00534    0.00043
C2    1    0.443891    0.399884    0.410334    11.00000    0.03562    0.03155 =
         0.02778   -0.00176    0.00847   -0.00211
C3    1    0.392884    0.294897    0.417571    11.00000    0.04395    0.03124 =
         0.03856   -0.00057    0.01435   -0.00247
AFIX  43
H3    2    0.416550    0.208899    0.424027    11.00000   -1.20000
AFIX   0
C4    1    0.306214    0.318179    0.415174    11.00000    0.04531    0.03590 =
         0.04462   -0.00242    0.01917   -0.01022
AFIX  43
H4    2    0.269684    0.247673    0.420135    11.00000   -1.20000
AFIX   0
C5    1    0.272950    0.443847    0.405577    11.00000    0.03509    0.04298 =
         0.04551   -0.00308    0.01732   -0.00624
AFIX  43
H5    2    0.213411    0.458261    0.404027    11.00000   -1.20000
AFIX   0
C6    1    0.324063    0.549897    0.398117    11.00000    0.03388    0.03404 =
         0.03832   -0.00212    0.01119   -0.00189
AFIX  43
H6    2    0.300128    0.635733    0.391656    11.00000   -1.20000
AFIX   0
C7    1    0.410727    0.527421    0.400328    11.00000    0.03176    0.03239 =
         0.02614   -0.00249    0.00724   -0.00302
C8    1    0.482468    0.615848    0.394548    11.00000    0.02791    0.03182 =
         0.02580   -0.00155    0.00502   -0.00150
C9    1    0.482947    0.749800    0.384093    11.00000    0.02930    0.03147 =
         0.02689   -0.00188    0.00507   -0.00089
C10   1    0.563006    0.808157    0.382658    11.00000    0.03048    0.03299 =
         0.02644   -0.00211    0.00403   -0.00394
C11   1    0.638497    0.732389    0.388852    11.00000    0.02892    0.03804 =
         0.02793   -0.00213    0.00429   -0.00546
C12   1    0.637641    0.595828    0.399158    11.00000    0.02815    0.03840 =
         0.02794   -0.00155    0.00231   -0.00118
C13   1    0.558809    0.540917    0.401843    11.00000    0.02973    0.03165 =
         0.02621   -0.00146    0.00377   -0.00099
C14   1    0.401290    0.830217    0.373783    11.00000    0.03026    0.02715 =
         0.03355    0.00070    0.00814   -0.00277
C15   1    0.343577    0.852328    0.304213    11.00000    0.03563    0.05627 =
         0.03392    0.00183    0.01033    0.00475
AFIX  43
H15   2    0.356789    0.818461    0.262936    11.00000   -1.20000
AFIX   0
C16   1    0.266575    0.923720    0.294583    11.00000    0.03799    0.06634 =
         0.04210    0.01143    0.00574    0.01086
AFIX  43
H16   2    0.227170    0.937887    0.246749    11.00000   -1.20000
AFIX   0
C17   1    0.246963    0.974057    0.353811    11.00000    0.03616    0.04454 =
         0.05811    0.00579    0.01614    0.00699
AFIX  43
H17   2    0.194352    1.023269    0.346928    11.00000   -1.20000
AFIX   0
C18   1    0.303838    0.952878    0.423102    11.00000    0.04594    0.03929 =
         0.04666   -0.00381    0.01907    0.00272
AFIX  43
H18   2    0.290449    0.987585    0.464118    11.00000   -1.20000
AFIX   0
C19   1    0.380444    0.881207    0.433209    11.00000    0.04155    0.03571 =
         0.03314   -0.00150    0.00829    0.00076
AFIX  43
H19   2    0.419212    0.866672    0.481243    11.00000   -1.20000
AFIX   0
C20   1    0.563640    0.953892    0.372654    11.00000    0.03653    0.03327 =
         0.03067   -0.00332    0.00776   -0.00633
AFIX  23
H20A  2    0.522437    0.996173    0.395017    11.00000   -1.20000
H20B  2    0.623794    0.989041    0.396303    11.00000   -1.20000
AFIX   0
C21   1    0.507916    1.110026    0.279092    11.00000    0.05798    0.03188 =
         0.03994   -0.00172    0.01336    0.00634
AFIX  23
H21A  2    0.555879    1.171435    0.304175    11.00000   -1.20000
H21B  2    0.456127    1.128214    0.295632    11.00000   -1.20000
AFIX   0
C22   1    0.483419    1.127544    0.198071    11.00000    0.04391    0.02648 =
         0.04056   -0.00063    0.01300   -0.00226
C23   1    0.402810    1.180438    0.158531    11.00000    0.04083    0.04529 =
         0.05331    0.00565    0.01630    0.00086
AFIX  43
H23   2    0.362328    1.207137    0.182998    11.00000   -1.20000
AFIX   0
C24   1    0.380510    1.194874    0.083658    11.00000    0.04431    0.05473 =
         0.05148    0.01127    0.00609   -0.00130
AFIX  43
H24   2    0.325112    1.232285    0.057164    11.00000   -1.20000
AFIX   0
C25   1    0.437424    1.155824    0.047512    11.00000    0.06480    0.04432 =
         0.04030    0.00501    0.01195   -0.00522
AFIX  43
H25   2    0.421583    1.165192   -0.004005    11.00000   -1.20000
AFIX   0
C26   1    0.517953    1.102759    0.086187    11.00000    0.06452    0.05532 =
         0.04762    0.00356    0.02499    0.00826
AFIX  43
H26   2    0.557730    1.074949    0.061286    11.00000   -1.20000
AFIX   0
C27   1    0.541024    1.089875    0.161054    11.00000    0.04934    0.05037 =
         0.04637    0.00320    0.01356    0.01175
AFIX  43
H27   2    0.597187    1.054682    0.187453    11.00000   -1.20000
AFIX   0
C28   1    0.722657    0.796905    0.386421    11.00000    0.03120    0.04311 =
         0.03230   -0.00238    0.00765   -0.00611
AFIX  23
H28A  2    0.754263    0.739432    0.361543    11.00000   -1.20000
H28B  2    0.709106    0.880483    0.359345    11.00000   -1.20000
AFIX   0
C29   1    0.859966    0.873420    0.465330    11.00000    0.02823    0.04708 =
         0.03841    0.00200    0.00879   -0.00909
AFIX  23
H29A  2    0.853146    0.963876    0.446168    11.00000   -1.20000
H29B  2    0.888997    0.820576    0.436337    11.00000   -1.20000
AFIX   0
C30   1    0.915115    0.872812    0.544469    11.00000    0.02222    0.03635 =
         0.03803    0.00070    0.00942   -0.00194
C31   1    0.954137    0.985807    0.578465    11.00000    0.03768    0.03588 =
         0.04656   -0.00011    0.01059   -0.00306
AFIX  43
H31   2    0.947806    1.064567    0.551226    11.00000   -1.20000
AFIX   0
C32   1    1.002465    0.985687    0.651908    11.00000    0.04847    0.05246 =
         0.04948   -0.01257    0.00461   -0.01144
AFIX  43
H32   2    1.029255    1.064123    0.674757    11.00000   -1.20000
AFIX   0
C33   1    1.011789    0.872725    0.691774    11.00000    0.03799    0.07023 =
         0.03874   -0.00011    0.00392    0.00028
AFIX  43
H33   2    1.044071    0.873339    0.742397    11.00000   -1.20000
AFIX   0
C34   1    0.974508    0.758595    0.658622    11.00000    0.04440    0.05008 =
         0.04794    0.01454    0.01315    0.00719
AFIX  43
H34   2    0.981749    0.680069    0.686150    11.00000   -1.20000
AFIX   0
C35   1    0.926335    0.758046    0.585012    11.00000    0.03778    0.03666 =
         0.04587    0.00114    0.01227   -0.00380
AFIX  43
H35   2    0.900857    0.678928    0.562133    11.00000   -1.20000
AFIX   0
C36   1    0.716533    0.509409    0.405047    11.00000    0.02688    0.04184 =
         0.04346    0.00134    0.00472    0.00169
AFIX  23
H36A  2    0.718982    0.439076    0.440881    11.00000   -1.20000
H36B  2    0.771347    0.561804    0.423374    11.00000   -1.20000
AFIX   0
C37   1    0.712588    0.447984    0.331523    11.00000    0.03733    0.04716 =
         0.05415   -0.00561    0.00840    0.00596
AFIX  23
H37A  2    0.714942    0.519435    0.297567    11.00000   -1.20000
H37B  2    0.654424    0.404524    0.311373    11.00000   -1.20000
AFIX   0
PART    1
C38   1    0.784794    0.348299    0.331755    21.00000    0.04068    0.04947 =
         0.04016   -0.00169    0.01855    0.00793
AFIX  23
H38A  2    0.787284    0.338241    0.281367    21.00000   -1.20000
H38B  2    0.842815    0.382179    0.362409    21.00000   -1.20000
AFIX   0
C39   1    0.769081    0.216045    0.360281    21.00000    0.05814    0.04064 =
         0.08159   -0.00467    0.03127    0.00284
AFIX 137
H39A  2    0.762078    0.226168    0.408716    21.00000   -1.50000
H39B  2    0.819686    0.158935    0.363798    21.00000   -1.50000
H39C  2    0.715289    0.177253    0.326832    21.00000   -1.50000
AFIX   0
PART    2
C38B  1    0.774439    0.324877    0.361069   -21.00000    0.04770    0.07818 =
         0.03260   -0.01472    0.01728   -0.00131
AFIX  23
H38C  2    0.835969    0.352778    0.386537   -21.00000   -1.20000
H38D  2    0.752566    0.273271    0.395319   -21.00000   -1.20000
AFIX   0
C39B  1    0.769897    0.245562    0.293672   -21.00000    0.07559    0.11703 =
         0.06680   -0.04861    0.01785    0.01394
AFIX 137
H39D  2    0.708341    0.220888    0.268582   -21.00000   -1.50000
H39E  2    0.805971    0.166554    0.308040   -21.00000   -1.50000
H39F  2    0.792442    0.297923    0.260785   -21.00000   -1.50000
AFIX   0
HKLF    4
 
REM  yf284_0m.res in P2(1)/n
REM R1 =  0.0468 for    5842 Fo > 4sig(Fo)  and  0.0803 for all    8839 data
REM    400 parameters refined using      0 restraints
 
END
 
WGHT      0.0567      0.3667
 
REM Highest difference peak  0.263,  deepest hole -0.199,  1-sigma level  0.038
Q1    1   0.5577  0.4769  0.4090  11.00000  0.05    0.26
Q2    1   0.4222  0.4640  0.3959  11.00000  0.05    0.25
Q3    1   0.4416  0.7930  0.3787  11.00000  0.05    0.24
Q4    1   0.4919  0.3982  0.4202  11.00000  0.05    0.24
Q5    1   0.5211  0.5811  0.3932  11.00000  0.05    0.23
Q6    1   0.5991  0.5718  0.4035  11.00000  0.05    0.23
Q7    1   0.6779  0.5609  0.4021  11.00000  0.05    0.23
Q8    1   0.6772  0.7611  0.3837  11.00000  0.05    0.22
Q9    1   0.6019  0.7689  0.3955  11.00000  0.05    0.21
Q10   1   0.6414  0.6682  0.3939  11.00000  0.05    0.21
Q11   1   0.4436  0.5860  0.3980  11.00000  0.05    0.21
Q12   1   0.9354  0.8143  0.5632  11.00000  0.05    0.21
Q13   1   0.5229  0.7767  0.3819  11.00000  0.05    0.20
Q14   1   0.4786  0.6831  0.3822  11.00000  0.05    0.20
Q15   1   0.5649  0.8778  0.3813  11.00000  0.05    0.19
Q16   1   0.7137  0.4441  0.3719  11.00000  0.05    0.19
Q17   1   0.4938  1.0829  0.1758  11.00000  0.05    0.18
Q18   1   0.4829  1.1176  0.2302  11.00000  0.05    0.18
Q19   1   0.3976  0.8738  0.3994  11.00000  0.05    0.18
Q20   1   0.9663  0.9780  0.6199  11.00000  0.05    0.18
;
_shelx_res_checksum   52618
 
_shelx_hkl_file
;
  -1   0   0   -0.37    0.01
   1   0   0   -0.37    0.00
   1   0   0   -0.37    0.01
   1   0   0   -0.37    0.01
  -1   0   0   -0.37    0.01
  -1   0   0   -0.37    0.01
  -2   0   0  249.72    4.66
  -2   0   0  248.79    4.67
  -2   0   0  254.38    4.71
   2   0   0  232.50    4.69
  -3   0   0   -0.09    0.03
   3   0   0   -0.06    0.03
  -3   0   0   -0.09    0.03
   3   0   0   -0.12    0.04
  -3   0   0   -0.06    0.04
   3   0   0   -0.11    0.04
  -4   0   0  328.14    6.14
   4   0   0  331.24    6.13
   4   0   0  324.48    6.17
  -4   0   0  323.45    6.20
  -4   0   0  329.36    6.12
   4   0   0  308.41    6.19
  -5   0   0   -0.01    0.03
   5   0   0    0.05    0.03
  -5   0   0   -0.02    0.04
   5   0   0   -0.05    0.05
  -5   0   0   -0.07    0.03
   5   0   0    0.01    0.05
   6   0   0   90.30    1.75
   6   0   0   91.06    1.80
   6   0   0   94.45    1.80
  -6   0   0   92.48    1.79
  -6   0   0   90.61    1.78
  -6   0   0   93.38    1.75
  -7   0   0   -0.05    0.05
  -7   0   0   -0.06    0.04
  -7   0   0    0.01    0.06
   7   0   0    0.01    0.04
   7   0   0   -0.08    0.06
  -8   0   0    4.53    0.18
  -8   0   0    4.46    0.17
   8   0   0    4.49    0.14
   8   0   0    4.89    0.19
  -9   0   0    0.00    0.06
   9   0   0   -0.09    0.04
   9   0   0   -0.01    0.07
  -9   0   0    0.02    0.06
  10   0   0    1.40    0.08
 -10   0   0    1.47    0.13
  10   0   0    1.29    0.13
 -10   0   0    1.30    0.12
 -11   0   0   -0.08    0.07
  11   0   0    0.03    0.04
  11   0   0    0.01    0.09
 -11   0   0    0.03    0.07
 -12   0   0    3.22    0.18
  12   0   0    3.09    0.12
 -12   0   0    2.84    0.19
  12   0   0    2.97    0.21
  13   0   0   -0.01    0.05
  13   0   0    0.20    0.12
 -13   0   0   -0.01    0.09
  14   0   0    9.61    0.39
 -14   0   0    9.94    0.37
  15   0   0   -0.07    0.13
  16   0   0    3.73    0.30
  17   0   0    0.02    0.15
  18   0   0    0.12    0.17
  19   0   0   -0.19    0.17
  20   0   0    0.28    0.21
  21   0   0    0.03    0.20
   0  -1   0    0.00    0.02
   0  -1   0   -0.01    0.02
   0   1   0    0.00    0.02
   0   1   0   -0.02    0.02
   1  -1   0   12.74    0.27
  -1  -1   0   12.35    0.27
   1   1   0   12.83    0.27
   1   1   0   12.73    0.27
  -1   1   0   13.01    0.28
  -2  -1   0   -0.13    0.04
  -2  -1   0   -0.12    0.03
   2  -1   0   -0.08    0.04
   2   1   0   -0.11    0.04
   2   1   0   -0.14    0.04
   2   1   0   -0.06    0.04
   3  -1   0   27.91    0.56
  -3  -1   0   28.24    0.56
  -3  -1   0   27.48    0.57
   3  -1   0   27.31    0.56
   3   1   0   26.72    0.57
   3   1   0   28.14    0.56
  -3   1   0   27.72    0.53
  -3   1   0   28.07    0.56
   3   1   0   27.69    0.57
   4  -1   0   28.85    0.61
  -4  -1   0   30.71    0.62
  -4  -1   0   30.28    0.61
   4  -1   0   28.91    0.61
   4   1   0   30.07    0.62
   4   1   0   29.57    0.62
  -4   1   0   30.16    0.61
  -4   1   0   30.23    0.58
   4   1   0   29.48    0.60
   5  -1   0    7.92    0.22
   5  -1   0    7.39    0.21
  -5  -1   0    7.64    0.21
  -5  -1   0    7.57    0.21
   5   1   0    8.01    0.24
  -5   1   0    7.83    0.21
   5   1   0    7.84    0.22
   5   1   0    7.71    0.20
  -5   1   0    7.68    0.17
  -6  -1   0    1.03    0.09
   6  -1   0    1.25    0.10
   6  -1   0    1.09    0.10
  -6  -1   0    0.93    0.08
   6   1   0    0.94    0.07
  -6   1   0    1.00    0.06
   6   1   0    0.95    0.09
  -6   1   0    1.08    0.09
  -7  -1   0    7.55    0.23
   7  -1   0    7.64    0.24
  -7  -1   0    7.55    0.23
  -7   1   0    7.74    0.17
   7   1   0    7.33    0.21
  -7   1   0    7.85    0.23
   7   1   0    7.68    0.25
   8  -1   0    5.33    0.21
  -8  -1   0    5.14    0.19
  -8  -1   0    4.97    0.19
   8   1   0    5.22    0.21
  -8   1   0    5.10    0.13
  -8   1   0    5.17    0.19
   8   1   0    5.19    0.17
  -9  -1   0    0.96    0.11
   9  -1   0    0.78    0.11
  -9  -1   0    0.76    0.09
   9   1   0    0.64    0.10
  -9   1   0    0.73    0.06
  -9   1   0    0.94    0.10
   9   1   0    0.84    0.08
 -10  -1   0   -0.02    0.07
  10  -1   0   -0.07    0.08
 -10  -1   0    0.14    0.07
  10   1   0    0.14    0.09
  10   1   0    0.04    0.06
 -10   1   0    0.04    0.07
 -11  -1   0    0.29    0.09
  11  -1   0    0.06    0.10
 -11  -1   0    0.33    0.09
  11   1   0    0.45    0.11
  11   1   0    0.23    0.07
 -11   1   0    0.40    0.09
 -12  -1   0    8.35    0.30
  12  -1   0    8.65    0.32
 -12  -1   0    8.52    0.31
  12   1   0    8.26    0.25
  12   1   0    8.78    0.33
 -12   1   0    8.26    0.29
 -13  -1   0    5.17    0.27
  13  -1   0    6.10    0.30
  13   1   0    5.14    0.20
  13   1   0    5.38    0.29
 -14  -1   0   14.34    0.46
  14  -1   0   14.22    0.48
  14   1   0   14.23    0.48
 -15  -1   0    0.21    0.12
  15  -1   0    0.04    0.13
  15   1   0    0.31    0.14
  16  -1   0    1.43    0.21
 -16  -1   0    1.41    0.18
  16   1   0    1.30    0.20
  17  -1   0    0.28    0.17
  17   1   0    0.39    0.17
  18  -1   0    0.31    0.17
  18   1   0    0.37    0.18
  19  -1   0   -0.04    0.17
  19   1   0    0.00    0.18
  20  -1   0    0.74    0.22
  20   1   0    0.39    0.20
  21  -1   0    0.32    0.21
  21   1   0    0.54    0.23
   0  -2   0    4.88    0.15
   0   2   0    4.98    0.16
  -1  -2   0    1.02    0.09
   1  -2   0    0.97    0.08
   1   2   0    1.01    0.05
   1   2   0    1.01    0.08
  -1   2   0    1.10    0.09
   2  -2   0    0.55    0.08
  -2  -2   0    0.37    0.07
   2   2   0    0.52    0.08
  -3  -2   0   20.47    0.44
   3  -2   0   19.71    0.44
  -3  -2   0   20.51    0.45
   3   2   0   20.48    0.44
   3   2   0   19.96    0.45
  -4  -2   0  147.01    2.77
   4  -2   0  143.41    2.76
  -4  -2   0  144.44    2.76
  -4   2   0  144.79    2.76
   4   2   0  143.74    2.77
   4   2   0  143.37    2.76
  -5  -2   0   21.06    0.47
   5  -2   0   21.29    0.48
  -5  -2   0   21.69    0.48
   5   2   0   20.72    0.47
  -5   2   0   20.96    0.47
   5   2   0   20.73    0.48
  -6  -2   0   14.59    0.37
  -6  -2   0   15.09    0.37
   6  -2   0   15.27    0.38
  -6   2   0   15.37    0.37
  -6   2   0   15.22    0.32
   6   2   0   15.37    0.39
   6   2   0   14.46    0.36
   7  -2   0    0.10    0.08
  -7  -2   0    0.07    0.06
  -7  -2   0    0.12    0.07
   7   2   0    0.12    0.08
  -7   2   0    0.12    0.06
  -7   2   0    0.08    0.03
   7   2   0   -0.02    0.06
   8  -2   0   15.32    0.41
  -8  -2   0   15.84    0.40
  -8  -2   0   15.66    0.40
   8   2   0   15.18    0.42
  -8   2   0   14.97    0.39
  -8   2   0   15.73    0.32
   8   2   0   15.36    0.38
  -9  -2   0   13.49    0.37
  -9  -2   0   13.59    0.38
   9  -2   0   13.51    0.38
  -9   2   0   13.98    0.37
   9   2   0   13.67    0.39
  -9   2   0   13.58    0.28
   9   2   0   13.78    0.36
 -10  -2   0    9.67    0.31
  10  -2   0    9.58    0.32
 -10  -2   0    9.69    0.31
  10   2   0   10.03    0.29
  10   2   0    9.54    0.33
 -10   2   0    9.62    0.30
 -11  -2   0    0.00    0.08
 -11  -2   0   -0.03    0.08
  11  -2   0   -0.09    0.09
 -11   2   0    0.09    0.08
  11   2   0    0.03    0.07
  11   2   0   -0.04    0.10
  12  -2   0    2.07    0.19
 -12  -2   0    2.08    0.18
 -12  -2   0    2.01    0.17
  12   2   0    2.30    0.15
  12   2   0    2.13    0.20
  13  -2   0    0.10    0.12
 -13  -2   0    0.05    0.10
  13   2   0    0.05    0.08
  13   2   0    0.10    0.12
  14  -2   0    0.69    0.16
 -14  -2   0    0.87    0.15
  14   2   0    0.77    0.11
  14   2   0    0.62    0.16
 -15  -2   0    5.91    0.31
  15  -2   0    6.04    0.33
  15   2   0    5.47    0.32
  16  -2   0    0.79    0.18
 -16  -2   0    0.73    0.16
  16   2   0    0.83    0.19
 -17  -2   0    0.17    0.14
  17  -2   0    0.03    0.16
  17   2   0    0.22    0.17
  18  -2   0    0.35    0.18
 -18  -2   0    0.20    0.15
  18   2   0    0.34    0.18
  19  -2   0    0.17    0.19
  19   2   0   -0.09    0.18
  20  -2   0    0.97    0.23
  20   2   0    0.86    0.23
  21  -2   0    1.66    0.29
  21   2   0    1.55    0.28
   0  -3   0    0.03    0.06
   0   3   0   -0.09    0.06
  -1  -3   0   56.05    1.12
   1  -3   0   55.86    1.12
  -1   3   0   55.59    1.12
   1   3   0   56.40    1.07
   1   3   0   55.25    1.12
  -2  -3   0   66.91    1.31
   2  -3   0   63.92    1.30
   2   3   0   67.22    1.23
   2   3   0   63.57    1.30
  -3  -3   0    0.91    0.10
   3  -3   0    0.58    0.08
  -3  -3   0    0.57    0.07
   3   3   0    0.66    0.09
  -4  -3   0   71.08    1.42
  -4  -3   0   70.88    1.41
   4  -3   0   71.34    1.41
   4   3   0   70.66    1.42
   4   3   0   70.09    1.42
   5  -3   0    0.14    0.07
  -5  -3   0    0.15    0.07
  -5  -3   0    0.11    0.03
  -5  -3   0    0.13    0.07
   5   3   0    0.10    0.08
  -5   3   0    0.21    0.07
   5   3   0    0.23    0.08
  -6  -3   0    7.51    0.24
  -6  -3   0    7.36    0.18
   6  -3   0    7.31    0.25
  -6  -3   0    6.53    0.24
   6   3   0    7.47    0.24
  -6   3   0    7.28    0.24
   6   3   0    7.29    0.26
  -7  -3   0    2.71    0.16
  -7  -3   0    2.90    0.16
   7  -3   0    2.80    0.17
  -7  -3   0    2.93    0.11
  -7   3   0    3.08    0.16
  -7   3   0    2.96    0.11
   7   3   0    3.11    0.16
   7   3   0    2.77    0.17
  -8  -3   0    2.63    0.16
   8  -3   0    2.45    0.17
  -8  -3   0    2.67    0.16
  -8  -3   0    2.52    0.12
  -8   3   0    2.37    0.15
   8   3   0    2.64    0.18
   8   3   0    2.65    0.16
  -8   3   0    2.64    0.10
   9  -3   0    1.28    0.14
  -9  -3   0    1.18    0.12
  -9  -3   0    1.25    0.13
   9   3   0    1.43    0.13
   9   3   0    1.36    0.15
  -9   3   0    1.34    0.12
  -9   3   0    1.22    0.07
 -10  -3   0    4.74    0.23
  10  -3   0    4.55    0.24
 -10  -3   0    4.40    0.22
  10   3   0    4.78    0.25
 -10   3   0    4.77    0.21
 -10   3   0    4.55    0.12
  10   3   0    5.07    0.22
 -11  -3   0   -0.04    0.09
  11  -3   0    0.07    0.11
 -11  -3   0    0.12    0.09
  11   3   0    0.10    0.09
 -11   3   0    0.03    0.08
  11   3   0    0.18    0.11
 -12  -3   0    2.01    0.18
 -12  -3   0    1.93    0.18
  12  -3   0    2.07    0.19
  12   3   0    2.02    0.17
  12   3   0    2.00    0.20
  13  -3   0    0.77    0.15
 -13  -3   0    1.13    0.15
  13   3   0    0.80    0.16
  13   3   0    0.83    0.12
 -14  -3   0    0.02    0.11
  14  -3   0    0.17    0.13
  14   3   0   -0.09    0.12
  14   3   0   -0.02    0.09
  15  -3   0    0.35    0.15
 -15  -3   0    0.26    0.13
  15   3   0    0.36    0.16
 -16  -3   0    1.51    0.20
  16  -3   0    1.17    0.20
  16   3   0    1.29    0.21
 -17  -3   0    2.21    0.24
  17  -3   0    2.10    0.25
  17   3   0    2.12    0.26
 -18  -3   0    0.90    0.20
  18  -3   0    1.57    0.23
  18   3   0    0.75    0.21
 -19  -3   0    4.09    0.35
  19  -3   0    4.21    0.35
  19   3   0    4.32    0.37
  20  -3   0    1.33    0.26
  20   3   0    1.86    0.29
   0  -4   0    0.18    0.08
   0   4   0    0.24    0.08
   1  -4   0   59.56    1.23
  -1  -4   0   59.53    1.23
   1   4   0   61.03    1.24
  -1   4   0   60.94    1.23
   1   4   0   60.23    1.17
  -2  -4   0   33.59    0.73
   2  -4   0   33.14    0.73
  -2   4   0   32.66    0.72
   2   4   0   33.11    0.74
   2   4   0   33.66    0.65
  -3  -4   0    1.54    0.14
  -3  -4   0    1.14    0.10
   3  -4   0    1.45    0.13
   3   4   0    1.46    0.13
  -4  -4   0   11.96    0.34
  -4  -4   0   12.34    0.36
   4  -4   0   12.75    0.35
   4   4   0   13.41    0.37
   4   4   0   12.17    0.36
   5  -4   0   79.31    1.59
  -5  -4   0   76.30    1.59
  -5  -4   0   77.20    1.57
   5   4   0   79.15    1.59
   5   4   0   79.56    1.60
   6  -4   0   20.63    0.52
  -6  -4   0   21.58    0.52
  -6  -4   0   20.46    0.52
   6   4   0   21.13    0.52
   6   4   0   19.91    0.52
  -7  -4   0   20.96    0.42
   7  -4   0   21.83    0.54
  -7  -4   0   21.77    0.54
  -7  -4   0   22.24    0.54
   7   4   0   20.81    0.54
   7   4   0   21.63    0.56
  -7   4   0   21.21    0.52
  -8  -4   0    6.06    0.25
  -8  -4   0    6.33    0.25
  -8  -4   0    6.05    0.15
   8  -4   0    5.88    0.25
   8   4   0    5.94    0.24
  -8   4   0    5.58    0.23
   8   4   0    5.86    0.26
  -9  -4   0    0.12    0.08
   9  -4   0    0.12    0.10
  -9  -4   0    0.09    0.04
  -9  -4   0    0.16    0.09
  -9   4   0    0.15    0.08
   9   4   0    0.15    0.09
   9   4   0    0.20    0.11
  -9   4   0    0.16    0.05
 -10  -4   0    0.21    0.10
 -10  -4   0    0.35    0.11
  10  -4   0    0.33    0.11
  10   4   0    0.38    0.13
 -10   4   0    0.34    0.05
 -10   4   0    0.36    0.10
  10   4   0    0.24    0.10
 -11  -4   0    0.63    0.13
  11  -4   0    0.42    0.13
 -11  -4   0    0.89    0.14
 -11   4   0    0.70    0.08
 -11   4   0    0.56    0.12
  11   4   0    0.54    0.14
  11   4   0    0.50    0.12
  12  -4   0   -0.01    0.12
 -12  -4   0    0.08    0.10
  12   4   0    0.11    0.13
  12   4   0   -0.03    0.10
 -13  -4   0    4.47    0.27
  13  -4   0    4.77    0.29
  13   4   0    4.46    0.25
  13   4   0    4.37    0.31
 -14  -4   0    0.09    0.11
  14  -4   0    0.18    0.14
  14   4   0    0.30    0.15
  14   4   0    0.24    0.11
  15  -4   0    0.94    0.18
 -15  -4   0    0.68    0.16
  15   4   0    0.70    0.14
  15   4   0    0.85    0.19
  16  -4   0    0.10    0.15
 -16  -4   0    0.02    0.13
  16   4   0   -0.17    0.16
  17  -4   0    0.03    0.16
 -17  -4   0    0.09    0.14
  17   4   0   -0.08    0.17
  18  -4   0    0.15    0.19
 -18  -4   0    0.10    0.16
  18   4   0    0.26    0.21
  19  -4   0    2.66    0.31
  19   4   0    2.14    0.30
  20  -4   0   -0.14    0.19
  20   4   0   -0.20    0.19
   0  -5   0   -0.11    0.08
   0   5   0    0.01    0.09
  -1  -5   0    0.00    0.09
   1  -5   0   -0.01    0.09
   1   5   0    0.00    0.05
   1   5   0    0.02    0.09
  -1   5   0    0.00    0.08
  -2  -5   0    1.60    0.15
   2  -5   0    1.76    0.16
   2   5   0    1.71    0.16
  -2   5   0    1.45    0.13
   2   5   0    1.63    0.09
  -3  -5   0   -0.07    0.08
   3  -5   0    0.07    0.08
  -3  -5   0   -0.03    0.06
   3   5   0    0.05    0.08
  -4  -5   0    2.29    0.17
   4  -5   0    2.58    0.18
  -4  -5   0    2.18    0.16
   4   5   0    2.84    0.20
   4   5   0    2.26    0.17
   5  -5   0   11.27    0.36
  -5  -5   0   11.63    0.35
  -5  -5   0   11.62    0.36
   5   5   0   11.35    0.36
   5   5   0   10.41    0.35
   6  -5   0   28.26    0.68
  -6  -5   0   28.82    0.67
  -6  -5   0   27.89    0.68
   6   5   0   27.37    0.68
   6   5   0   28.29    0.70
   7  -5   0    0.76    0.13
  -7  -5   0    0.75    0.12
  -7  -5   0    0.67    0.11
   7   5   0    0.97    0.14
   7   5   0    0.85    0.13
  -8  -5   0    0.08    0.09
  -8  -5   0    0.11    0.10
   8  -5   0    0.03    0.10
  -8   5   0   -0.02    0.08
   8   5   0    0.00    0.09
   8   5   0    0.13    0.10
   9  -5   0   11.70    0.39
  -9  -5   0   10.75    0.38
  -9  -5   0   11.64    0.38
  -9   5   0   10.53    0.35
   9   5   0   10.85    0.37
   9   5   0   11.51    0.41
 -10  -5   0    1.08    0.15
 -10  -5   0    1.13    0.14
  10  -5   0    1.23    0.17
  10   5   0    1.13    0.16
 -10   5   0    0.94    0.13
  10   5   0    1.30    0.18
 -10   5   0    1.34    0.15
 -11  -5   0    3.40    0.23
 -11  -5   0    2.88    0.23
  11  -5   0    2.75    0.24
  11   5   0    3.20    0.26
  11   5   0    2.58    0.21
 -12  -5   0   11.06    0.41
  12  -5   0   11.39    0.43
  12   5   0   11.61    0.40
  12   5   0   10.76    0.43
 -13  -5   0    0.91    0.17
  13  -5   0    0.75    0.17
  13   5   0    1.04    0.19
  13   5   0    0.90    0.15
 -14  -5   0    0.19    0.13
  14  -5   0    0.03    0.14
  14   5   0    0.22    0.16
  14   5   0    0.05    0.12
  15  -5   0    0.15    0.16
 -15  -5   0    0.26    0.14
  15   5   0    0.24    0.17
  15   5   0    0.17    0.12
 -16  -5   0    1.18    0.21
  16  -5   0    0.99    0.20
  16   5   0    1.16    0.23
 -17  -5   0    0.28    0.16
  17  -5   0    0.22    0.17
  17   5   0    0.17    0.19
  18  -5   0    0.10    0.19
  18   5   0   -0.10    0.20
  19  -5   0   -0.07    0.20
  19   5   0    0.14    0.21
  20  -5   0    0.17    0.21
  20   5   0    0.34    0.23
   0  -6   0    7.29    0.29
   0   6   0    7.36    0.29
   1  -6   0   -0.06    0.09
  -1  -6   0   -0.02    0.09
  -1   6   0   -0.06    0.08
   1   6   0   -0.06    0.10
  -2  -6   0    7.47    0.27
  -2  -6   0    7.02    0.29
   2  -6   0    6.96    0.29
   2   6   0    7.16    0.30
  -2   6   0    7.63    0.29
   2   6   0    7.41    0.20
   3  -6   0   34.08    0.81
  -3  -6   0   34.03    0.79
  -3  -6   0   35.69    0.82
   3   6   0   34.67    0.81
   3   6   0   33.49    0.81
  -4  -6   0    5.87    0.25
   4  -6   0    5.64    0.27
  -4  -6   0    6.06    0.28
   4   6   0    5.99    0.27
   4   6   0    6.53    0.29
   5  -6   0    0.49    0.13
  -5  -6   0    0.43    0.12
  -5  -6   0    0.56    0.12
   5   6   0    0.37    0.12
   5   6   0    0.34    0.11
   6  -6   0   16.23    0.48
  -6  -6   0   16.60    0.50
  -6  -6   0   17.28    0.48
   6   6   0   17.24    0.50
   6   6   0   17.11    0.51
  -7  -6   0    0.86    0.15
  -7  -6   0    0.95    0.14
   7  -6   0    0.74    0.14
   7   6   0    0.70    0.14
   7   6   0    0.83    0.15
  -8  -6   0    2.59    0.21
   8  -6   0    2.47    0.21
  -8  -6   0    2.81    0.22
  -8   6   0    2.86    0.20
   8   6   0    2.59    0.23
   8   6   0    2.73    0.21
  -9  -6   0    1.54    0.18
   9  -6   0    1.44    0.18
  -9  -6   0    1.05    0.15
   9   6   0    1.05    0.17
  -9   6   0    1.16    0.15
   9   6   0    1.47    0.18
 -10  -6   0    5.43    0.30
 -10  -6   0    5.58    0.30
  10  -6   0    5.59    0.31
  10   6   0    5.54    0.32
  10   6   0    6.04    0.30
 -11  -6   0    0.17    0.11
 -11  -6   0   -0.05    0.12
  11  -6   0    0.04    0.14
  11   6   0    0.04    0.12
 -11   6   0    0.01    0.07
  11   6   0   -0.13    0.13
  12  -6   0    0.02    0.14
 -12  -6   0    0.14    0.11
  12   6   0    0.12    0.15
  12   6   0    0.06    0.13
 -13  -6   0    0.28    0.13
  13  -6   0    0.37    0.17
  13   6   0    0.30    0.14
  13   6   0    0.33    0.17
  14  -6   0    0.20    0.15
 -14  -6   0   -0.02    0.13
  14   6   0    0.32    0.18
  14   6   0   -0.12    0.12
 -15  -6   0    0.19    0.15
  15  -6   0   -0.01    0.16
  15   6   0    0.15    0.14
  15   6   0    0.25    0.17
  16  -6   0    0.77    0.22
  16   6   0    0.67    0.21
  17  -6   0    0.65    0.22
  17   6   0    1.06    0.24
  18  -6   0    1.60    0.28
  18   6   0    1.20    0.27
  19  -6   0    1.18    0.26
  19   6   0    0.93    0.26
   0  -7   0    0.04    0.12
   0   7   0   -0.05    0.10
   1  -7   0    3.67    0.25
  -1  -7   0    3.91    0.25
  -1  -7   0    3.61    0.21
  -1   7   0    3.90    0.24
   1   7   0    4.08    0.24
  -2  -7   0    3.42    0.24
   2  -7   0    3.04    0.23
  -2  -7   0    3.22    0.20
  -2   7   0    3.07    0.23
   2   7   0    3.65    0.23
   3  -7   0    2.38    0.20
  -3  -7   0    3.12    0.20
  -3  -7   0    2.91    0.23
   3   7   0    2.76    0.24
   3   7   0    2.98    0.22
  -4  -7   0   27.62    0.72
  -4  -7   0   27.45    0.69
   4  -7   0   26.92    0.71
   4   7   0   28.35    0.73
   4   7   0   28.58    0.74
  -5  -7   0    0.67    0.14
  -5  -7   0    0.34    0.10
   5  -7   0    0.30    0.12
   5   7   0    0.40    0.15
   5   7   0    0.44    0.14
   6  -7   0   12.14    0.43
  -6  -7   0   11.89    0.41
  -6  -7   0   12.34    0.43
   6   7   0   12.30    0.44
   6   7   0   12.36    0.44
  -7  -7   0    0.06    0.12
   7  -7   0    0.20    0.14
  -7  -7   0    0.25    0.11
   7   7   0    0.50    0.16
   7   7   0    0.14    0.12
  -8  -7   0    5.92    0.30
  -8  -7   0    5.68    0.30
   8  -7   0    5.81    0.32
   8   7   0    5.81    0.33
   8   7   0    5.54    0.32
   9  -7   0    0.36    0.15
  -9  -7   0    0.48    0.14
  -9  -7   0    0.24    0.15
  -9   7   0    0.46    0.15
   9   7   0    0.30    0.17
   9   7   0    0.31    0.15
 -10  -7   0    2.36    0.22
  10  -7   0    3.22    0.28
 -10  -7   0    3.13    0.27
  10   7   0    2.98    0.25
  10   7   0    2.79    0.25
  11  -7   0   -0.12    0.14
 -11  -7   0    0.22    0.12
  11   7   0   -0.07    0.15
  11   7   0   -0.04    0.13
  12  -7   0    0.04    0.15
 -12  -7   0    0.27    0.13
  12   7   0    0.17    0.16
  12   7   0   -0.16    0.13
 -13  -7   0    0.36    0.17
  13  -7   0    0.39    0.18
  13   7   0    0.48    0.17
  13   7   0    0.40    0.18
  14  -7   0    0.04    0.17
  14   7   0   -0.01    0.16
  14   7   0   -0.03    0.14
  15  -7   0    0.41    0.20
  15   7   0    0.27    0.16
  15   7   0    0.09    0.18
  16  -7   0   -0.04    0.18
  16   7   0   -0.02    0.19
  16   7   0    0.29    0.24
  17  -7   0   -0.05    0.19
  17   7   0    0.07    0.21
  18  -7   0    2.22    0.31
  18   7   0    1.73    0.30
   0  -8   0    0.59    0.15
   0   8   0    0.38    0.15
   1  -8   0    2.00    0.22
  -1  -8   0    1.34    0.18
  -1  -8   0    2.19    0.22
   1   8   0    2.16    0.22
  -1   8   0    2.22    0.23
   1   8   0    2.23    0.23
  -2  -8   0   44.53    1.05
  -2  -8   0   41.97    1.00
   2  -8   0   42.70    1.03
  -2   8   0   42.38    1.02
   2   8   0   42.88    1.03
   2   8   0   44.27    1.05
  -3  -8   0    6.78    0.34
   3  -8   0    6.39    0.33
  -3  -8   0    6.01    0.29
   3   8   0    6.58    0.32
   3   8   0    6.72    0.33
  -4  -8   0    7.16    0.32
  -4  -8   0    6.51    0.35
   4  -8   0    6.86    0.35
   4   8   0    6.82    0.36
   4   8   0    7.12    0.34
  -5  -8   0    0.94    0.18
   5  -8   0    0.53    0.15
  -5  -8   0    1.19    0.17
   5   8   0    0.81    0.18
   5   8   0    0.99    0.20
  -6  -8   0   22.63    0.67
  -6  -8   0   22.67    0.65
   6  -8   0   22.90    0.67
   6   8   0   23.23    0.69
   6   8   0   22.95    0.66
  -7  -8   0    0.16    0.13
  -7  -8   0    0.12    0.15
   7  -8   0    0.39    0.16
   7   8   0    0.59    0.19
   7   8   0    0.19    0.15
  -8  -8   0    9.65    0.41
   8  -8   0    9.89    0.42
  -8  -8   0    9.52    0.42
   8   8   0    9.11    0.42
   8   8   0    9.57    0.43
  -9  -8   0    1.24    0.20
   9  -8   0    1.48    0.21
   9   8   0    1.22    0.20
  -9   8   0    1.07    0.15
   9   8   0    1.07    0.20
 -10  -8   0    1.14    0.20
  10  -8   0    0.93    0.21
  10   8   0    0.93    0.19
  10   8   0    1.11    0.22
 -10   8   0    0.80    0.14
  11  -8   0    0.00    0.15
  11   8   0    0.32    0.16
  11   8   0    0.22    0.18
  12  -8   0   -0.22    0.16
  12   8   0    0.12    0.18
  12   8   0    0.07    0.15
  13  -8   0    1.19    0.23
  13   8   0    1.19    0.25
  13   8   0    0.73    0.19
  14  -8   0    0.30    0.20
  14   8   0    0.14    0.16
  14   8   0   -0.03    0.18
  15  -8   0    0.16    0.20
  15   8   0    0.27    0.20
  15   8   0   -0.18    0.15
  16  -8   0   -0.29    0.18
  16   8   0    0.07    0.17
  16   8   0    0.24    0.22
  17  -8   0    0.33    0.23
  17   8   0   -0.07    0.22
   0  -9   0   -0.14    0.14
   0   9   0    0.07    0.16
   0   9   0    0.07    0.15
   1  -9   0    8.06    0.39
  -1  -9   0    6.68    0.36
  -1   9   0    8.10    0.38
   1   9   0    6.73    0.37
   1   9   0    6.78    0.36
  -1   9   0    7.70    0.38
   2  -9   0    6.19    0.34
  -2  -9   0    6.10    0.36
  -2   9   0    6.90    0.35
   2   9   0    6.75    0.36
   2   9   0    5.96    0.36
  -2   9   0    6.00    0.35
  -3  -9   0   -0.27    0.14
   3  -9   0   -0.15    0.13
   3   9   0    0.06    0.16
   3   9   0    0.11    0.14
  -4  -9   0    0.28    0.15
   4  -9   0    0.05    0.15
   4   9   0    0.07    0.17
   4   9   0    0.24    0.15
   5  -9   0    4.38    0.32
  -5  -9   0    4.30    0.30
   5   9   0    4.88    0.35
   5   9   0    4.51    0.31
   6  -9   0    5.13    0.34
  -6  -9   0    4.37    0.30
   6   9   0    4.81    0.34
  -6   9   0    4.41    0.28
   6   9   0    4.20    0.31
  -7  -9   0    0.35    0.16
   7  -9   0    0.16    0.16
  -7   9   0    0.19    0.13
   7   9   0   -0.03    0.15
   7   9   0    0.39    0.19
  -8  -9   0    0.48    0.16
   8  -9   0    0.26    0.17
   8   9   0    0.41    0.18
   8   9   0    0.30    0.17
  -8   9   0    0.63    0.15
  -9  -9   0    0.44    0.18
   9  -9   0    0.25    0.18
   9   9   0    0.07    0.18
   9   9   0    0.20    0.17
  -9   9   0    0.10    0.12
  10  -9   0    0.48    0.20
  10   9   0    0.55    0.19
  10   9   0    1.07    0.20
  11  -9   0   -0.16    0.17
  11   9   0   -0.37    0.17
  11   9   0    0.23    0.18
  12  -9   0    0.22    0.20
  12   9   0    0.03    0.17
  12   9   0    0.52    0.21
  13  -9   0    0.10    0.20
  13   9   0    0.27    0.21
  13   9   0    0.20    0.17
  14  -9   0   -0.28    0.18
  14   9   0   -0.08    0.21
  14   9   0   -0.22    0.16
  15  -9   0    0.32    0.22
  15   9   0    0.55    0.20
  15   9   0    0.37    0.24
  16  -9   0    0.53    0.24
  16   9   0    0.40    0.25
  16   9   0    0.37    0.20
   0 -10   0    1.69    0.25
   0  10   0    1.92    0.24
   0  10   0    1.52    0.22
   1 -10   0    0.02    0.15
  -1 -10   0    0.13    0.16
  -1  10   0    0.06    0.14
   1  10   0   -0.06    0.15
   1  10   0   -0.01    0.16
  -1  10   0    0.08    0.17
   2 -10   0    3.58    0.32
  -2 -10   0    3.91    0.30
   2  10   0    3.40    0.31
  -2  10   0    3.57    0.28
   2  10   0    3.88    0.33
  -3 -10   0    3.32    0.30
   3 -10   0    3.25    0.31
  -3  10   0    3.44    0.29
   3  10   0    2.93    0.28
   3  10   0    3.49    0.30
  -4 -10   0   -0.11    0.14
   4 -10   0   -0.19    0.16
   4  10   0    0.07    0.17
  -4  10   0    0.05    0.15
   4  10   0   -0.02    0.15
  -5 -10   0    0.41    0.17
   5 -10   0    0.20    0.16
   5  10   0    0.48    0.19
   5  10   0    0.77    0.19
  -5  10   0    0.60    0.17
   6 -10   0    0.13    0.17
  -6 -10   0    0.02    0.17
  -6  10   0    0.10    0.14
   6  10   0   -0.04    0.15
   6  10   0   -0.18    0.16
   7 -10   0    2.75    0.31
  -7 -10   0    2.91    0.30
   7  10   0    2.63    0.28
  -7  10   0    2.77    0.25
   7  10   0    3.21    0.33
  -8 -10   0    2.12    0.27
   8 -10   0    1.88    0.26
   8  10   0    3.00    0.32
  -8  10   0    1.83    0.21
   8  10   0    2.04    0.27
   9 -10   0    0.38    0.21
   9  10   0    0.11    0.18
  -9  10   0   -0.10    0.12
   9  10   0   -0.19    0.15
  10 -10   0    0.15    0.19
  10  10   0    0.04    0.17
  10  10   0   -0.13    0.19
  11 -10   0    0.03    0.20
  11  10   0    0.52    0.21
  11  10   0    0.33    0.22
  12 -10   0    0.60    0.23
  12  10   0    0.71    0.25
  12  10   0    0.52    0.21
  13 -10   0    1.12    0.27
  13  10   0    0.77    0.25
  13  10   0    0.92    0.24
  14 -10   0    0.21    0.23
  14  10   0    0.57    0.21
  14  10   0    0.20    0.25
  15 -10   0    0.51    0.25
  15  10   0    0.17    0.25
  15  10   0    0.73    0.24
   0 -11   0   -0.05    0.18
   0  11   0   -0.07    0.17
   0  11   0   -0.10    0.17
  -1 -11   0    0.12    0.19
   1 -11   0    0.34    0.18
  -1  11   0    0.21    0.18
  -1  11   0    0.08    0.18
   1  11   0    0.05    0.15
   1  11   0    0.18    0.16
  -2 -11   0    0.33    0.18
   2 -11   0    0.08    0.18
   2  11   0    0.30    0.19
   2  11   0    0.16    0.17
  -2  11   0    0.33    0.16
  -3 -11   0   -0.19    0.17
   3 -11   0   -0.16    0.18
   3  11   0   -0.08    0.18
  -3  11   0    0.08    0.16
   3  11   0    0.01    0.18
   4 -11   0    0.00    0.18
  -4 -11   0    0.06    0.18
   4  11   0    0.19    0.19
  -4  11   0    0.04    0.16
   4  11   0    0.29    0.18
  -5 -11   0    1.69    0.25
   5 -11   0    1.03    0.24
   5  11   0    1.37    0.24
  -5  11   0    1.52    0.22
   5  11   0    1.57    0.25
  -6 -11   0    0.97    0.22
   6 -11   0    0.79    0.23
   6  11   0    1.03    0.26
   6  11   0    0.82    0.22
  -6  11   0    0.89    0.20
   7 -11   0   -0.06    0.19
  -7 -11   0    0.08    0.18
  -7  11   0   -0.02    0.15
   7  11   0    0.03    0.20
   7  11   0   -0.26    0.17
   8 -11   0    0.24    0.21
   8  11   0    0.15    0.18
   8  11   0    0.28    0.23
  -8  11   0   -0.01    0.15
   9 -11   0    0.16    0.22
   9  11   0   -0.18    0.19
   9  11   0    0.10    0.20
  10 -11   0    0.78    0.24
  10  11   0    0.38    0.19
  10  11   0    0.46    0.21
  11 -11   0    0.07    0.22
  11  11   0    0.31    0.24
  11  11   0    0.14    0.18
  12 -11   0   -0.17    0.22
  12  11   0    0.08    0.23
  12  11   0    0.09    0.18
  13 -11   0    0.15    0.23
  13  11   0    0.59    0.23
  13  11   0    0.67    0.28
   0 -12   0    2.90    0.34
   0  12   0    2.08    0.28
   0  12   0    2.30    0.27
   1 -12   0    0.12    0.21
  -1 -12   0   -0.16    0.20
   1  12   0   -0.09    0.17
  -1  12   0    0.03    0.18
   1  12   0   -0.07    0.19
  -2 -12   0   -0.12    0.19
   2 -12   0    0.43    0.24
   2  12   0   -0.11    0.20
   2  12   0   -0.23    0.18
  -2  12   0   -0.30    0.16
   3 -12   0    0.80    0.23
  -3 -12   0    0.59    0.22
   3  12   0    1.10    0.26
   3  12   0    0.47    0.23
  -3  12   0    0.97    0.23
  -4 -12   0   -0.19    0.20
   4 -12   0    0.30    0.23
  -4  12   0    0.38    0.19
   4  12   0    0.10    0.21
   4  12   0    0.44    0.23
  -5 -12   0    0.35    0.20
   5 -12   0    0.18    0.23
  -5  12   0    0.47    0.20
   5  12   0   -0.03    0.21
   5  12   0    0.49    0.24
  -6 -12   0    0.39    0.21
   6 -12   0    0.27    0.22
  -6  12   0   -0.21    0.16
   6  12   0   -0.08    0.18
   6  12   0    0.01    0.23
   7 -12   0   -0.07    0.21
   7  12   0    0.13    0.23
   7  12   0   -0.06    0.20
  -7  12   0   -0.21    0.16
   8 -12   0    0.22    0.23
   8  12   0   -0.10    0.20
   8  12   0   -0.18    0.19
   9 -12   0    0.45    0.26
   9  12   0    0.48    0.21
   9  12   0    0.14    0.25
  10 -12   0    0.40    0.25
  10  12   0    0.10    0.22
  10  12   0    0.27    0.25
  11 -12   0   -0.15    0.23
  11  12   0   -0.29    0.23
  11  12   0    0.03    0.21
   0 -13   0   -0.25    0.22
   0  13   0   -0.11    0.22
   0  13   0   -0.08    0.20
   1 -13   0   -0.20    0.22
  -1 -13   0    0.27    0.25
   1  13   0   -0.10    0.21
   1  13   0   -0.12    0.20
  -1  13   0   -0.05    0.18
   2 -13   0   -0.24    0.23
  -2 -13   0   -0.12    0.23
  -2  13   0   -0.20    0.19
   2  13   0    0.09    0.21
   2  13   0    0.03    0.19
   3 -13   0    0.19    0.25
  -3 -13   0    0.50    0.26
   3  13   0    0.00    0.22
   3  13   0    0.25    0.21
  -3  13   0    0.07    0.20
  -4 -13   0    2.04    0.32
   4 -13   0    2.26    0.33
  -4  13   0    1.90    0.28
   4  13   0    2.48    0.35
   4  13   0    2.30    0.33
  -5 -13   0   -0.16    0.22
   5 -13   0    0.19    0.25
  -5  13   0   -0.33    0.17
   5  13   0    0.07    0.22
   5  13   0    0.02    0.21
   6 -13   0    0.12    0.25
  -6  13   0    0.20    0.20
   6  13   0    0.33    0.23
   6  13   0    0.45    0.25
   7 -13   0    0.31    0.26
   7  13   0    0.19    0.21
   7  13   0    0.36    0.27
   8 -13   0   -0.01    0.24
   8  13   0   -0.36    0.35
   8  13   0    0.00    0.21
   9 -13   0    0.16    0.24
   9  13   0   -0.32    0.20
   0 -14   0    6.20    0.53
   0  14   0    6.71    0.50
  -1 -14   0    0.78    0.30
   1 -14   0    0.74    0.29
  -1  14   0    0.60    0.23
   1  14   0    0.80    0.27
   2 -14   0    2.86    0.39
  -2 -14   0    3.31    0.41
   2  14   0    2.57    0.36
  -2  14   0    2.88    0.36
   2  14   0    1.94    0.33
   3 -14   0    0.33    0.28
  -3 -14   0    0.07    0.25
   3  14   0   -0.24    0.36
  -3  14   0   -0.19    0.20
   3  14   0    0.36    0.25
  -4 -14   0    0.18    0.27
   4 -14   0    0.05    0.28
  -4  14   0   -0.13    0.20
   4  14   0   -0.28    0.23
   5 -14   0    0.06    0.26
   5  14   0    0.13    0.25
  -5  14   0   -0.08    0.21
  21   0  -1    0.76    0.24
  20   0  -1   -0.02    0.19
  19   0  -1    0.06    0.17
  18   0  -1   -0.09    0.15
  17   0  -1    0.70    0.18
  16   0  -1    0.08    0.14
  15   0  -1    0.15    0.15
  14   0  -1    0.16    0.13
  13   0  -1   15.95    0.34
  13   0  -1   16.22    0.50
  12   0  -1   -0.09    0.10
  12   0  -1    0.00    0.04
 -12   0   1    0.15    0.09
 -12   0   1    0.08    0.08
 -11   0   1    0.01    0.08
  11   0  -1    0.01    0.04
 -11   0   1    0.03    0.08
  11   0  -1    0.04    0.10
 -10   0   1    0.00    0.07
  10   0  -1    0.03    0.08
 -10   0   1    0.03    0.06
  10   0  -1    0.00    0.04
   9   0  -1    6.45    0.24
  -9   0   1    6.04    0.22
  -9   0   1    6.21    0.22
   9   0  -1    6.24    0.16
  -8   0   1   -0.05    0.05
   8   0  -1    0.05    0.07
  -8   0   1    0.03    0.06
   8   0  -1    0.01    0.04
   7   0  -1   88.96    1.70
  -7   0   1   88.54    1.75
  -7   0   1   88.59    1.76
   7   0  -1   91.86    1.78
   6   0  -1   -0.01    0.03
  -6   0   1    0.04    0.04
   6   0  -1    0.00    0.06
  -6   0   1    0.10    0.06
  -5   0   1   38.42    0.80
  -5   0   1   38.53    0.79
   5   0  -1   39.51    0.80
   5   0  -1   39.41    0.75
   4   0  -1   -0.06    0.06
   4   0  -1   -0.02    0.03
  -4   0   1   -0.09    0.04
  -4   0   1    0.12    0.06
   4   0  -1    0.03    0.07
   3   0  -1   43.98    0.88
  -3   0   1   44.75    0.88
   3   0  -1   45.30    0.89
  -3   0   1   45.30    0.88
   2   0  -1   -0.60    0.04
  -2   0   1   -0.69    0.05
   2   0  -1   -0.80    0.05
   1   0  -1   -0.12    0.00
   1   0  -1   -0.12    0.01
   1   0  -1   -0.13    0.01
  -1   0   1   -0.11    0.01
  -1   0   1   -0.12    0.01
   0   0  -1   -0.19    0.00
   0   0   1   -0.18    0.01
   1   0   1   56.02    1.09
   1   0   1   58.63    1.09
  -2   0  -1    0.02    0.03
   2   0   1   -0.02    0.02
   2   0   1    0.01    0.03
   2   0   1   -0.01    0.00
  -2   0  -1    0.01    0.03
  -2   0  -1    0.05    0.02
  -3   0  -1  189.92    3.61
   3   0   1  185.20    3.61
  -3   0  -1  195.24    3.62
  -3   0  -1  192.51    3.62
   3   0   1  192.64    3.61
  -3   0  -1  192.87    3.60
   4   0   1    0.03    0.04
   4   0   1    0.06    0.04
  -4   0  -1    0.02    0.04
  -4   0  -1    0.00    0.03
   4   0   1   -0.04    0.03
  -4   0  -1   -0.01    0.04
  -5   0  -1   44.68    0.88
   5   0   1   44.45    0.90
   5   0   1   44.51    0.88
  -5   0  -1   44.98    0.89
   5   0   1   44.81    0.89
  -5   0  -1   44.71    0.88
   6   0   1   -0.06    0.05
  -6   0  -1   -0.09    0.04
  -6   0  -1   -0.05    0.04
  -6   0  -1   -0.02    0.04
   6   0   1   -0.01    0.04
   6   0   1    0.02    0.06
  -7   0  -1   -0.03    0.04
   7   0   1   -0.06    0.06
  -7   0  -1    0.22    0.06
  -7   0  -1    0.01    0.05
   7   0   1   -0.01    0.04
   7   0   1    0.04    0.06
   8   0   1   -0.09    0.06
   8   0   1   -0.01    0.04
  -8   0  -1    0.00    0.05
  -8   0  -1   -0.03    0.05
   8   0   1   -0.07    0.06
  -8   0  -1   -0.03    0.04
   9   0   1    2.72    0.16
  -9   0  -1    2.51    0.14
  -9   0  -1    2.47    0.12
   9   0   1    2.48    0.11
  -9   0  -1    2.66    0.14
 -10   0  -1   -0.04    0.05
 -10   0  -1   -0.01    0.06
  10   0   1    0.00    0.05
 -10   0  -1    0.06    0.06
  10   0   1   -0.05    0.08
  11   0   1    0.40    0.06
 -11   0  -1    0.65    0.10
 -11   0  -1    0.42    0.09
  11   0   1    0.51    0.11
  12   0   1   -0.03    0.11
 -12   0  -1    0.11    0.09
  12   0   1    0.02    0.06
  13   0   1   42.87    0.90
  13   0   1   46.27    1.03
 -13   0  -1   44.23    1.00
  14   0   1    0.05    0.12
 -14   0  -1   -0.01    0.10
  15   0   1    2.45    0.23
  16   0   1    0.02    0.14
  17   0   1    0.33    0.16
  18   0   1    0.01    0.16
  19   0   1    0.90    0.21
  20   0   1    0.09    0.18
  21   0   1    0.40    0.21
  21  -1  -1    1.20    0.26
  21   1  -1    1.35    0.27
  20  -1  -1    0.74    0.22
  20   1  -1    0.74    0.23
  19  -1  -1    0.57    0.21
  19   1  -1    0.26    0.19
  18  -1  -1    0.64    0.20
  18   1  -1    0.45    0.19
  17  -1  -1    0.08    0.15
  17   1  -1    0.05    0.15
  16  -1  -1    4.15    0.30
 -16  -1   1    3.71    0.28
  16   1  -1    3.58    0.30
 -15  -1   1    0.30    0.13
  15  -1  -1    0.27    0.15
  15   1  -1    0.62    0.16
 -14  -1   1    0.19    0.11
  14  -1  -1   -0.10    0.12
  14   1  -1    0.00    0.13
 -13  -1   1    2.48    0.20
  13  -1  -1    2.26    0.20
  13   1  -1    2.15    0.20
  13   1  -1    2.29    0.13
 -12  -1   1    0.14    0.09
 -12  -1   1    0.20    0.09
  12  -1  -1    0.07    0.10
  12   1  -1    0.04    0.11
 -12   1   1    0.12    0.09
  12   1  -1    0.04    0.06
 -11  -1   1   13.56    0.39
  11  -1  -1   13.62    0.42
 -11  -1   1   13.55    0.39
  11   1  -1   13.72    0.42
 -11   1   1   13.32    0.38
  11   1  -1   12.87    0.33
 -10  -1   1    0.58    0.10
 -10  -1   1    0.51    0.10
  10  -1  -1    0.33    0.10
  10   1  -1    0.63    0.11
  10   1  -1    0.51    0.07
 -10   1   1    0.59    0.10
  -9  -1   1    0.34    0.09
  -9  -1   1    0.49    0.08
   9  -1  -1    0.47    0.10
   9   1  -1    0.46    0.06
  -9   1   1    0.41    0.08
   9   1  -1    0.50    0.10
  -8  -1   1   -0.01    0.06
   8  -1  -1    0.03    0.07
  -8  -1   1    0.04    0.06
  -8   1   1    0.02    0.06
   8   1  -1   -0.02    0.05
   8   1  -1   -0.04    0.07
  -7  -1   1    1.69    0.13
   7  -1  -1    1.79    0.13
  -7  -1   1    1.75    0.12
   7   1  -1    1.77    0.14
  -7   1   1    1.64    0.13
   7   1  -1    1.85    0.10
  -6  -1   1   29.31    0.63
  -6  -1   1   29.72    0.64
   6  -1  -1   29.18    0.64
  -6   1   1   29.32    0.63
   6   1  -1   28.75    0.64
   6   1  -1   29.66    0.60
   5  -1  -1   41.69    0.86
  -5  -1   1   41.29    0.86
  -5  -1   1   42.57    0.85
   5   1  -1   41.56    0.86
   5   1  -1   41.85    0.83
  -5   1   1   42.87    0.86
  -4  -1   1   80.16    1.54
   4  -1  -1   77.76    1.54
  -4  -1   1   80.05    1.53
   4   1  -1   78.32    1.55
  -4   1   1   80.63    1.54
  -3  -1   1   18.14    0.39
   3  -1  -1   17.72    0.39
  -3  -1   1   17.92    0.38
   3  -1  -1   17.44    0.39
   3   1  -1   17.82    0.39
  -3   1   1   17.70    0.38
  -3   1   1   17.64    0.34
   2  -1  -1    0.43    0.05
  -2  -1   1    0.33    0.04
  -2  -1   1    0.27    0.04
   2   1  -1    0.38    0.05
  -2   1   1    0.45    0.04
   2   1  -1    0.41    0.06
   2   1  -1    0.41    0.04
   1  -1  -1   73.93    1.41
   1  -1  -1   75.97    1.42
  -1  -1   1   74.71    1.42
  -1  -1   1   76.99    1.42
  -1   1   1   73.91    1.42
   1   1  -1   73.72    1.42
   1   1  -1   73.15    1.42
  -1   1   1   73.97    1.41
   1   1  -1   75.36    1.42
   0  -1  -1   36.74    0.78
   0  -1   1   43.71    0.78
   0  -1  -1   34.63    0.78
   0  -1   1   42.52    0.78
   0  -1  -1   43.03    0.79
   0   1  -1   37.93    0.78
   0   1   1   43.50    0.79
   0   1   1   40.34    0.78
   0   1  -1   37.06    0.78
   0   1  -1   40.55    0.78
   0   1   1   43.74    0.79
   0   1  -1   43.81    0.78
  -1  -1  -1   -0.01    0.03
  -1  -1  -1   -0.02    0.03
   1  -1   1   -0.02    0.03
   1  -1   1   -0.06    0.01
   1  -1   1   -0.01    0.03
   1  -1   1   -0.03    0.02
   1   1   1   -0.03    0.03
   1   1   1   -0.02    0.03
  -1   1  -1    0.00    0.02
   1   1   1    0.03    0.04
  -1   1  -1   -0.03    0.03
  -2  -1  -1    5.35    0.13
   2  -1   1    5.13    0.13
  -2  -1  -1    5.49    0.14
   2   1   1    5.19    0.14
  -2   1  -1    5.36    0.13
  -2   1  -1    5.40    0.16
   2   1   1    5.24    0.15
   2   1   1    5.10    0.12
   2   1   1    5.22    0.14
  -3  -1  -1    0.36    0.05
  -3  -1  -1    0.36    0.06
   3  -1   1    0.35    0.05
   3   1   1    0.30    0.06
   3   1   1    0.38    0.06
  -3   1  -1    0.43    0.05
  -3   1  -1    0.37    0.05
   3   1   1    0.33    0.06
   4  -1   1   40.12    0.81
   4  -1   1   40.07    0.81
  -4  -1  -1   40.32    0.80
  -4  -1  -1   40.64    0.81
  -4  -1  -1   40.70    0.81
  -4  -1  -1   41.67    0.81
   4   1   1   40.65    0.82
  -4   1  -1   41.17    0.80
  -4   1  -1   41.02    0.79
  -4   1  -1   40.03    0.79
   4   1   1   40.32    0.81
   4   1   1   40.74    0.81
   5  -1   1    5.22    0.14
   5  -1   1    5.45    0.17
  -5  -1  -1    5.21    0.16
  -5  -1  -1    5.32    0.16
  -5  -1  -1    5.14    0.16
   5  -1   1    5.26    0.16
  -5  -1  -1    5.20    0.16
  -5   1  -1    5.45    0.16
  -5   1  -1    5.45    0.15
   5   1   1    5.21    0.17
   5   1   1    5.37    0.16
   5   1   1    5.20    0.17
  -5   1  -1    5.57    0.14
   6  -1   1   27.56    0.56
  -6  -1  -1   27.82    0.59
   6  -1   1   27.83    0.59
  -6  -1  -1   27.42    0.58
   6  -1   1   27.25    0.59
  -6  -1  -1   27.69    0.58
   6   1   1   27.40    0.60
  -6   1  -1   27.46    0.56
  -6   1  -1   27.82    0.58
   6   1   1   27.91    0.58
   6   1   1   27.36    0.60
  -6   1  -1   27.51    0.57
   7  -1   1    0.02    0.06
   7  -1   1    0.09    0.07
  -7  -1  -1    0.11    0.06
  -7  -1  -1    0.07    0.05
   7  -1   1    0.10    0.04
  -7  -1  -1    0.18    0.06
  -7   1  -1    0.07    0.05
   7   1   1    0.05    0.06
  -7   1  -1    0.11    0.06
   7   1   1    0.17    0.07
   7   1   1    0.07    0.07
  -7   1  -1    0.08    0.04
  -8  -1  -1   24.15    0.54
   8  -1   1   23.73    0.55
   8  -1   1   23.61    0.54
  -8  -1  -1   23.92    0.54
   8  -1   1   23.56    0.49
  -8  -1  -1   23.45    0.52
   8   1   1   23.66    0.56
   8   1   1   23.12    0.52
  -8   1  -1   24.18    0.49
  -8   1  -1   22.92    0.52
  -8   1  -1   23.82    0.53
   9  -1   1    0.28    0.05
   9  -1   1    0.32    0.08
  -9  -1  -1    0.27    0.07
  -9  -1  -1    0.35    0.08
  -9   1  -1    0.30    0.05
  -9   1  -1    0.37    0.07
   9   1   1    0.31    0.09
   9   1   1    0.43    0.07
  -9   1  -1    0.24    0.07
  10  -1   1    4.62    0.22
 -10  -1  -1    4.58    0.20
 -10  -1  -1    4.68    0.19
 -10   1  -1    4.93    0.20
  10   1   1    4.86    0.18
 -10   1  -1    4.83    0.15
 -10   1  -1    4.84    0.19
  10   1   1    4.47    0.21
  11  -1   1    0.06    0.10
 -11  -1  -1    0.11    0.08
 -11  -1  -1    0.04    0.07
 -11   1  -1   -0.01    0.05
 -11   1  -1    0.11    0.07
  11   1   1    0.07    0.07
  11   1   1    0.16    0.09
 -12  -1  -1    2.21    0.18
  12  -1   1    2.55    0.20
  12   1   1    2.26    0.14
  12   1   1    2.30    0.20
  13  -1   1   30.70    0.76
 -13  -1  -1   30.04    0.74
  13   1   1   30.67    0.77
  13   1   1   30.54    0.67
  14  -1   1    0.55    0.14
 -14  -1  -1    0.33    0.12
  14   1   1    0.21    0.13
  15  -1   1    0.47    0.15
 -15  -1  -1    0.04    0.11
  15   1   1    0.09    0.14
  16  -1   1   -0.13    0.13
 -16  -1  -1   -0.10    0.11
  16   1   1   -0.07    0.14
  17  -1   1   -0.04    0.15
 -17  -1  -1    0.13    0.14
  17   1   1    0.16    0.15
  18  -1   1   -0.01    0.16
  18   1   1    0.10    0.16
  19  -1   1    0.20    0.18
  19   1   1   -0.11    0.17
  20  -1   1   -0.17    0.17
  20   1   1    0.13    0.19
  21  -1   1    0.23    0.20
  21   1   1    0.03    0.18
  21  -2  -1    3.41    0.35
  21   2  -1    2.75    0.33
  20  -2  -1    0.42    0.21
  20   2  -1    0.56    0.23
  19  -2  -1   -0.07    0.18
  19   2  -1    0.14    0.19
 -18  -2   1    1.29    0.21
  18  -2  -1    0.83    0.21
  18   2  -1    1.01    0.22
 -17  -2   1    0.38    0.16
  17  -2  -1    0.58    0.17
  17   2  -1    0.75    0.19
  16  -2  -1    1.09    0.19
 -16  -2   1    0.88    0.17
  16   2  -1    0.97    0.19
 -15  -2   1    0.23    0.13
  15  -2  -1    0.31    0.15
  15   2  -1    0.30    0.15
 -14  -2   1    2.73    0.22
  14  -2  -1    2.04    0.22
  14   2  -1    1.81    0.15
  14   2  -1    1.90    0.21
 -13  -2   1    0.19    0.11
  13  -2  -1    0.23    0.13
  13   2  -1    0.08    0.08
  13   2  -1    0.08    0.13
 -12  -2   1    0.35    0.11
  12  -2  -1    0.37    0.12
 -12  -2   1    0.42    0.11
 -12   2   1    0.55    0.11
  12   2  -1    0.57    0.09
  12   2  -1    0.59    0.14
 -11  -2   1   30.43    0.74
  11  -2  -1   31.82    0.76
 -11  -2   1   32.23    0.75
  11   2  -1   31.47    0.70
 -11   2   1   31.98    0.73
  11   2  -1   31.35    0.77
 -10  -2   1   13.09    0.38
 -10  -2   1   12.76    0.37
  10  -2  -1   13.11    0.39
  10   2  -1   12.93    0.34
 -10   2   1   11.76    0.36
  10   2  -1   12.83    0.39
  -9  -2   1    0.41    0.08
   9  -2  -1    0.35    0.09
  -9  -2   1    0.41    0.09
  -9   2   1    0.45    0.09
   9   2  -1    0.29    0.10
   9   2  -1    0.51    0.08
  -8  -2   1    1.05    0.10
  -8  -2   1    1.13    0.11
   8  -2  -1    1.11    0.12
  -8   2   1    1.21    0.11
   8   2  -1    1.13    0.10
   8   2  -1    1.17    0.12
  -7  -2   1  165.48    3.15
   7  -2  -1  165.81    3.16
  -7  -2   1  161.75    3.16
  -7   2   1  159.62    3.14
   7   2  -1  165.06    3.17
   7   2  -1  163.15    3.13
  -6  -2   1    2.34    0.14
   6  -2  -1    2.76    0.15
  -6  -2   1    2.63    0.15
  -6   2   1    2.65    0.08
  -6   2   1    2.76    0.14
   6   2  -1    2.54    0.13
   6   2  -1    2.66    0.14
   5  -2  -1    4.19    0.17
  -5  -2   1    3.92    0.16
  -5  -2   1    4.53    0.16
   5   2  -1    4.03    0.17
   5   2  -1    4.29    0.16
  -5   2   1    4.13    0.16
   4  -2  -1    0.12    0.06
  -4  -2   1    0.22    0.07
  -4  -2   1    0.24    0.06
  -4   2   1    0.28    0.06
   4   2  -1    0.23    0.07
   3  -2  -1  381.48    7.23
  -3  -2   1  376.93    7.18
  -3  -2   1  391.90    7.25
   3   2  -1  356.56    7.08
   2  -2  -1  999.58   18.58
  -2  -2   1  973.21   18.56
  -2  -2   1  989.00   18.54
   2   2  -1 1000.00   18.49
   2   2  -1  929.79   18.57
   1  -2  -1   41.71    0.84
  -1  -2   1   41.60    0.81
  -1  -2   1   41.83    0.84
   1   2  -1   41.12    0.83
  -1   2   1   41.44    0.84
   1   2  -1   42.30    0.81
   0  -2  -1    2.87    0.12
   0  -2   1    2.37    0.11
   0  -2   1    2.79    0.11
   0   2   1    2.77    0.12
   0   2   1    2.72    0.13
   0   2  -1    2.88    0.10
   0   2  -1    2.68    0.11
   1  -2   1    0.60    0.07
  -1  -2  -1    0.61    0.08
   1  -2   1    0.44    0.07
  -1   2  -1    0.47    0.06
   1   2   1    0.38    0.07
  -1   2  -1    0.47    0.07
   1   2   1    0.42    0.08
   2  -2   1   14.48    0.33
  -2  -2  -1   13.98    0.33
   2  -2   1   14.52    0.33
  -2   2  -1   14.12    0.34
   2   2   1   14.76    0.34
   2   2   1   13.84    0.33
   3  -2   1   60.34    1.17
  -3  -2  -1   59.35    1.18
  -3  -2  -1   60.81    1.18
   3   2   1   58.42    1.18
   3   2   1   58.85    1.18
  -4  -2  -1   42.41    0.87
  -4  -2  -1   43.63    0.87
  -4  -2  -1   43.65    0.83
   4  -2   1   43.05    0.87
   4   2   1   42.36    0.87
   4   2   1   42.50    0.88
  -4   2  -1   42.26    0.86
  -5  -2  -1   11.85    0.27
  -5  -2  -1   12.00    0.30
  -5  -2  -1   11.68    0.29
   5  -2   1   11.82    0.30
   5   2   1   11.54    0.30
  -5   2  -1   11.96    0.29
   5   2   1   11.71    0.31
  -5   2  -1   11.61    0.27
   6  -2   1  154.42    2.95
  -6  -2  -1  155.10    2.92
  -6  -2  -1  152.31    2.94
  -6  -2  -1  156.62    2.95
   6   2   1  153.51    2.96
  -6   2  -1  154.77    2.93
  -6   2  -1  151.32    2.90
   6   2   1  149.78    2.95
   7  -2   1    1.06    0.11
  -7  -2  -1    1.13    0.10
  -7  -2  -1    1.10    0.10
  -7   2  -1    1.04    0.07
  -7   2  -1    1.24    0.10
   7   2   1    1.29    0.11
   7   2   1    1.30    0.12
   8  -2   1   54.76    1.15
  -8  -2  -1   56.15    1.14
  -8  -2  -1   54.75    1.14
  -8   2  -1   54.62    1.08
  -8   2  -1   55.95    1.13
   8   2   1   55.04    1.13
   8   2   1   55.97    1.16
  -9  -2  -1    2.57    0.16
   9  -2   1    2.80    0.17
  -9  -2  -1    2.68    0.15
   9   2   1    2.85    0.15
   9   2   1    2.91    0.18
  -9   2  -1    2.63    0.14
  -9   2  -1    2.81    0.10
  10  -2   1    0.55    0.11
 -10  -2  -1    0.47    0.10
 -10  -2  -1    0.48    0.09
 -10   2  -1    0.63    0.09
 -10   2  -1    0.49    0.05
  10   2   1    0.35    0.11
  10   2   1    0.47    0.09
 -11  -2  -1    1.47    0.14
  11  -2   1    1.35    0.15
 -11  -2  -1    1.61    0.14
 -11   2  -1    1.44    0.08
  11   2   1    1.60    0.13
  11   2   1    1.32    0.15
 -11   2  -1    1.39    0.13
 -12  -2  -1   16.52    0.46
  12  -2   1   16.14    0.48
  12   2   1   16.00    0.48
  12   2   1   15.42    0.42
 -13  -2  -1    0.76    0.13
  13  -2   1    0.60    0.14
  13   2   1    0.72    0.15
  13   2   1    0.71    0.11
  14  -2   1    0.80    0.16
 -14  -2  -1    1.08    0.16
  14   2   1    0.75    0.16
  14   2   1    0.98    0.12
  15  -2   1    0.38    0.14
 -15  -2  -1    0.37    0.12
  15   2   1    0.24    0.14
  16  -2   1    0.88    0.17
 -16  -2  -1    0.67    0.15
  16   2   1    0.86    0.19
  17  -2   1    0.10    0.15
 -17  -2  -1    0.12    0.13
  17   2   1    0.18    0.17
 -18  -2  -1    0.53    0.17
  18  -2   1    0.53    0.18
  18   2   1    0.39    0.19
 -19  -2  -1   -0.04    0.15
  19  -2   1    0.06    0.18
  19   2   1    0.03    0.18
  20  -2   1    0.08    0.19
  20   2   1    0.21    0.19
  21  -3  -1    0.44    0.22
  21   3  -1    0.24    0.22
  20  -3  -1    5.53    0.41
  20   3  -1    5.84    0.44
 -19  -3   1    0.01    0.16
  19  -3  -1    0.39    0.20
  19   3  -1   -0.02    0.19
  18  -3  -1    0.82    0.21
 -18  -3   1    0.33    0.16
  18   3  -1    0.90    0.21
 -17  -3   1    0.17    0.14
  17  -3  -1    0.19    0.17
  17   3  -1    0.18    0.17
  16  -3  -1    5.93    0.36
 -16  -3   1    5.92    0.34
  16   3  -1    5.91    0.37
  15  -3  -1    0.22    0.14
 -15  -3   1    0.17    0.12
  15   3  -1    0.12    0.14
  14  -3  -1   13.14    0.47
 -14  -3   1   13.16    0.45
  14   3  -1   12.48    0.38
  14   3  -1   13.80    0.48
 -13  -3   1    2.32    0.19
  13  -3  -1    2.28    0.21
  13   3  -1    2.58    0.18
  13   3  -1    2.52    0.23
 -12  -3   1    2.77    0.20
  12  -3  -1    3.26    0.23
 -12  -3   1    3.04    0.22
  12   3  -1    2.90    0.24
  12   3  -1    3.43    0.20
 -12   3   1    2.81    0.19
 -11  -3   1    0.11    0.09
  11  -3  -1    0.00    0.10
 -11  -3   1    0.08    0.10
  11   3  -1    0.07    0.08
 -11   3   1    0.15    0.09
  11   3  -1   -0.13    0.09
 -10  -3   1   -0.04    0.08
  10  -3  -1   -0.05    0.10
 -10  -3   1    0.14    0.09
  10   3  -1    0.00    0.10
 -10   3   1    0.03    0.08
  10   3  -1    0.03    0.07
  -9  -3   1    0.07    0.08
   9  -3  -1    0.34    0.10
  -9  -3   1    0.28    0.09
  -9   3   1    0.16    0.08
   9   3  -1    0.31    0.08
   9   3  -1    0.18    0.10
  -8  -3   1   14.91    0.41
  -8  -3   1   14.74    0.41
   8  -3  -1   15.48    0.42
  -8   3   1   14.84    0.40
  -8   3   1   15.04    0.32
   8   3  -1   15.41    0.43
   8   3  -1   14.79    0.39
  -7  -3   1    0.95    0.10
   7  -3  -1    0.94    0.11
  -7  -3   1    0.92    0.11
   7   3  -1    0.84    0.10
   7   3  -1    1.12    0.12
  -7   3   1    1.03    0.11
  -6  -3   1   64.90    1.31
  -6  -3   1   63.93    1.30
   6  -3  -1   64.34    1.31
   6   3  -1   63.84    1.29
  -6   3   1   61.68    1.29
   6   3  -1   63.78    1.31
   5  -3  -1   10.77    0.31
  -5  -3   1   10.78    0.30
  -5  -3   1   10.94    0.31
   5   3  -1   10.23    0.31
  -4  -3   1   51.39    1.03
   4  -3  -1   50.91    1.04
  -4  -3   1   50.61    1.04
   4   3  -1   48.80    1.04
   3  -3  -1   13.30    0.34
  -3  -3   1   13.61    0.27
  -3  -3   1   13.85    0.34
  -3  -3   1   12.89    0.34
   3   3  -1   13.86    0.35
  -2  -3   1    2.00    0.11
   2  -3  -1    1.97    0.12
  -2  -3   1    1.87    0.13
  -2  -3   1    1.88    0.07
   2   3  -1    1.66    0.12
  -1  -3   1   40.41    0.83
   1  -3  -1   39.04    0.83
  -1   3   1   40.12    0.83
   1   3  -1   40.91    0.84
   1   3  -1   40.49    0.79
   0  -3   1    6.89    0.20
   0  -3   1    7.56    0.22
   0  -3  -1    8.36    0.24
   0   3  -1    8.04    0.23
   0   3  -1    8.05    0.20
   0   3   1    7.60    0.23
  -1  -3  -1    0.12    0.07
   1  -3   1    0.01    0.06
   1   3   1    0.18    0.06
  -1   3  -1    0.03    0.07
   1   3   1    0.04    0.06
  -1   3  -1    0.05    0.05
  -2  -3  -1  295.01    5.54
   2  -3   1  293.67    5.53
   2   3   1  291.65    5.54
   2   3   1  292.16    5.54
   3  -3   1  117.50    2.23
  -3  -3  -1  114.62    2.23
   3   3   1  113.40    2.24
   3   3   1  114.93    2.24
   4  -3   1   46.80    0.96
  -4  -3  -1   46.65    0.97
   4   3   1   47.67    0.98
   4   3   1   46.46    0.98
  -5  -3  -1   40.44    0.85
   5  -3   1   40.04    0.85
  -5  -3  -1   40.98    0.84
   5   3   1   39.18    0.85
   5   3   1   39.67    0.86
  -5   3  -1   39.83    0.83
  -6  -3  -1    1.26    0.07
   6  -3   1    1.14    0.11
  -6  -3  -1    1.23    0.11
  -6  -3  -1    1.31    0.12
  -6   3  -1    1.39    0.11
   6   3   1    1.50    0.13
   6   3   1    1.15    0.11
  -7  -3  -1    0.03    0.06
  -7  -3  -1    0.06    0.04
  -7  -3  -1    0.02    0.07
   7  -3   1    0.00    0.07
  -7   3  -1    0.07    0.06
  -7   3  -1    0.03    0.04
   7   3   1   -0.11    0.08
   7   3   1    0.03    0.07
  -8  -3  -1    5.18    0.18
  -8  -3  -1    5.28    0.21
   8  -3   1    5.25    0.22
  -8  -3  -1    5.51    0.22
   8   3   1    4.97    0.21
  -8   3  -1    5.03    0.15
  -8   3  -1    4.92    0.19
   8   3   1    5.28    0.23
  -9  -3  -1    2.22    0.16
   9  -3   1    2.93    0.19
  -9  -3  -1    2.38    0.16
  -9   3  -1    2.59    0.11
   9   3   1    2.64    0.17
  -9   3  -1    2.39    0.14
   9   3   1    2.65    0.19
  10  -3   1   -0.07    0.09
 -10  -3  -1    0.03    0.07
 -10  -3  -1    0.02    0.08
  10   3   1   -0.01    0.08
 -10   3  -1   -0.11    0.06
 -10   3  -1    0.02    0.04
  10   3   1    0.08    0.10
  11  -3   1   13.25    0.41
 -11  -3  -1   12.99    0.40
 -11  -3  -1   12.59    0.39
 -11   3  -1   12.73    0.29
  11   3   1   12.92    0.42
  11   3   1   12.98    0.39
  12  -3   1    0.43    0.13
 -12  -3  -1    0.25    0.11
  12   3   1    0.21    0.13
  12   3   1    0.29    0.10
  13  -3   1    0.55    0.14
 -13  -3  -1    0.66    0.14
  13   3   1    0.58    0.15
  13   3   1    0.82    0.13
  14  -3   1    0.25    0.14
 -14  -3  -1    0.19    0.12
  14   3   1    0.06    0.14
  14   3   1    0.33    0.11
  15  -3   1    0.23    0.14
 -15  -3  -1    0.08    0.12
  15   3   1    0.04    0.14
 -16  -3  -1    0.84    0.17
  16  -3   1    0.57    0.17
  16   3   1    0.87    0.19
  17  -3   1    0.00    0.16
 -17  -3  -1    0.19    0.14
  17   3   1    0.19    0.16
  18  -3   1    2.41    0.28
 -18  -3  -1    2.04    0.24
  18   3   1    2.40    0.28
  19  -3   1    0.03    0.18
 -19  -3  -1    0.26    0.16
  19   3   1    0.14    0.19
  20  -3   1    0.12    0.20
 -20  -3  -1   -0.28    0.16
  20   3   1    0.33    0.21
  20  -4  -1    0.14    0.20
  20   4  -1    0.01    0.21
  19  -4  -1    0.61    0.23
  19   4  -1    0.94    0.25
 -18  -4   1    0.58    0.18
  18  -4  -1    0.78    0.23
  18   4  -1    0.61    0.22
 -17  -4   1   -0.13    0.13
  17  -4  -1    0.07    0.17
  17   4  -1   -0.11    0.16
 -16  -4   1    0.00    0.12
  16  -4  -1    0.03    0.15
  16   4  -1    0.15    0.16
  15  -4  -1   -0.09    0.13
 -15  -4   1   -0.28    0.11
  15   4  -1    0.09    0.14
  15   4  -1   -0.04    0.10
  14  -4  -1   -0.12    0.12
 -14  -4   1    0.03    0.11
  14   4  -1   -0.08    0.10
  14   4  -1   -0.02    0.13
  13  -4  -1    7.79    0.36
 -13  -4   1    8.05    0.35
  13   4  -1    8.15    0.32
  13   4  -1    8.48    0.38
 -12  -4   1    1.65    0.18
 -12  -4   1    2.02    0.19
  12  -4  -1    1.90    0.20
  12   4  -1    1.78    0.20
  12   4  -1    1.83    0.17
 -11  -4   1    1.49    0.16
  11  -4  -1    1.10    0.16
 -11  -4   1    1.38    0.16
  11   4  -1    1.67    0.19
  11   4  -1    1.51    0.16
 -11   4   1    1.20    0.15
 -10  -4   1    0.02    0.09
 -10  -4   1   -0.01    0.09
  10  -4  -1    0.05    0.11
 -10   4   1    0.10    0.09
 -10   4   1    0.09    0.04
  10   4  -1   -0.14    0.11
 -10   4   1    0.13    0.04
  10   4  -1    0.02    0.09
   9  -4  -1    3.07    0.21
  -9  -4   1    2.80    0.11
  -9  -4   1    2.86    0.19
  -9  -4   1    2.68    0.19
  -9   4   1    2.87    0.18
  -9   4   1    2.79    0.11
   9   4  -1    2.89    0.21
  -9   4   1    2.74    0.11
   9   4  -1    2.87    0.18
   8  -4  -1    0.55    0.11
  -8  -4   1    0.75    0.11
  -8  -4   1    0.68    0.12
  -8   4   1    0.69    0.11
   8   4  -1    0.53    0.12
   8   4  -1    0.71    0.11
  -7  -4   1    1.28    0.13
  -7  -4   1    1.58    0.14
   7  -4  -1    1.17    0.14
   7   4  -1    1.38    0.13
  -7   4   1    1.32    0.13
   7   4  -1    1.27    0.15
  -6  -4   1    5.18    0.22
   6  -4  -1    4.98    0.22
  -6  -4   1    5.30    0.22
   6   4  -1    5.19    0.21
   6   4  -1    5.08    0.23
  -5  -4   1    0.03    0.07
   5  -4  -1    0.10    0.08
  -5  -4   1    0.19    0.07
   5   4  -1    0.17    0.10
   4  -4  -1    7.74    0.27
  -4  -4   1    8.13    0.27
  -4  -4   1    8.04    0.26
   4   4  -1    7.71    0.27
  -3  -4   1    7.83    0.24
  -3  -4   1    7.75    0.26
   3  -4  -1    7.16    0.25
   3   4  -1    7.02    0.25
  -2  -4   1    4.59    0.19
   2  -4  -1    4.42    0.19
  -2  -4   1    4.54    0.18
   2   4  -1    4.41    0.13
  -2   4   1    4.72    0.20
   2   4  -1    4.45    0.20
  -1  -4   1    0.59    0.10
   1  -4  -1    0.61    0.10
  -1   4   1    0.50    0.09
   1   4  -1    0.61    0.07
   1   4  -1    0.57    0.09
   0  -4   1    1.10    0.09
   0  -4  -1    1.13    0.11
   0  -4   1    1.30    0.12
   0   4  -1    1.49    0.13
   0   4   1    1.20    0.12
   0   4  -1    1.36    0.10
   1  -4   1   13.96    0.37
  -1  -4  -1   14.16    0.37
   1   4   1   14.31    0.38
   1   4   1   13.85    0.37
  -1   4  -1   14.61    0.37
  -2  -4  -1   71.41    1.43
   2  -4   1   70.77    1.42
   2   4   1   70.70    1.33
   2   4   1   68.70    1.42
   2   4   1   69.32    1.42
  -2   4  -1   70.89    1.41
  -3  -4  -1    4.15    0.19
   3  -4   1    3.89    0.19
   3   4   1    3.95    0.19
   3   4   1    4.11    0.20
  -4  -4  -1   10.20    0.31
   4  -4   1   10.39    0.31
   4   4   1   10.20    0.31
   4   4   1   10.87    0.32
   5  -4   1    0.03    0.08
  -5  -4  -1    0.07    0.08
  -5  -4  -1    0.08    0.07
   5   4   1    0.12    0.08
   5   4   1    0.05    0.08
   6  -4   1    2.12    0.16
  -6  -4  -1    2.45    0.16
  -6  -4  -1    2.30    0.16
  -6   4  -1    2.25    0.15
   6   4   1    2.29    0.17
   6   4   1    2.32    0.16
  -7  -4  -1    8.18    0.28
  -7  -4  -1    8.66    0.29
   7  -4   1    8.38    0.29
   7   4   1    8.54    0.30
  -7   4  -1    7.94    0.26
   7   4   1    8.31    0.29
  -8  -4  -1    1.66    0.08
  -8  -4  -1    1.72    0.14
  -8  -4  -1    1.51    0.14
   8  -4   1    1.56    0.15
   8   4   1    1.43    0.15
   8   4   1    1.64    0.14
  -8   4  -1    1.78    0.13
  -8   4  -1    1.58    0.10
   9  -4   1    0.55    0.12
  -9  -4  -1    0.57    0.12
  -9  -4  -1    0.54    0.11
  -9  -4  -1    0.67    0.07
  -9   4  -1    0.65    0.07
  -9   4  -1    0.86    0.11
   9   4   1    0.51    0.12
   9   4   1    0.94    0.13
 -10  -4  -1    7.63    0.30
 -10  -4  -1    6.90    0.28
  10  -4   1    7.69    0.30
 -10   4  -1    7.78    0.21
 -10   4  -1    7.17    0.27
  10   4   1    7.48    0.30
  10   4   1    8.22    0.33
  11  -4   1    0.21    0.12
 -11  -4  -1    0.15    0.10
 -11  -4  -1    0.13    0.10
  11   4   1   -0.01    0.10
  11   4   1    0.05    0.13
 -12  -4  -1    9.69    0.37
  12  -4   1   10.19    0.39
  12   4   1   10.60    0.40
  12   4   1    9.97    0.36
  13  -4   1    0.33    0.14
 -13  -4  -1    0.25    0.12
  13   4   1    0.40    0.12
  13   4   1    0.32    0.15
  14  -4   1    0.87    0.17
 -14  -4  -1    0.96    0.16
  14   4   1    0.60    0.13
  14   4   1    0.87    0.18
  15  -4   1    0.11    0.15
 -15  -4  -1   -0.06    0.11
  15   4   1    0.01    0.14
  15   4   1   -0.02    0.11
  16  -4   1    0.72    0.18
 -16  -4  -1    0.70    0.17
  16   4   1    0.52    0.19
 -17  -4  -1    2.63    0.26
  17  -4   1    3.06    0.29
  17   4   1    3.04    0.30
  18  -4   1   -0.18    0.17
 -18  -4  -1   -0.03    0.15
  18   4   1   -0.01    0.18
  19  -4   1    0.00    0.17
 -19  -4  -1   -0.13    0.16
  19   4   1    0.29    0.20
  20  -4   1   -0.12    0.19
  20   4   1    0.10    0.21
  20  -5  -1    0.14    0.22
  20   5  -1   -0.06    0.21
  19  -5  -1   -0.05    0.19
  19   5  -1    0.11    0.21
  18  -5  -1    0.40    0.21
  18   5  -1    0.28    0.21
  17  -5  -1   -0.21    0.16
  17   5  -1   -0.06    0.17
 -16  -5   1    0.20    0.15
  16  -5  -1    0.18    0.17
  16   5  -1    0.00    0.17
  15  -5  -1    0.19    0.16
 -15  -5   1   -0.10    0.11
  15   5  -1    0.21    0.12
  15   5  -1    0.04    0.16
  14  -5  -1    0.31    0.16
 -14  -5   1    0.24    0.13
  14   5  -1    0.15    0.16
  14   5  -1    0.22    0.13
 -13  -5   1    2.13    0.22
  13  -5  -1    2.21    0.23
  13   5  -1    2.35    0.25
  13   5  -1    2.54    0.21
 -12  -5   1    0.98    0.15
 -12  -5   1    1.03    0.17
  12  -5  -1    0.95    0.17
  12   5  -1    1.06    0.18
  12   5  -1    0.97    0.15
 -11  -5   1    0.12    0.12
  11  -5  -1   -0.10    0.12
 -11  -5   1    0.05    0.11
  11   5  -1    0.22    0.12
  11   5  -1    0.30    0.15
 -11   5   1    0.30    0.11
 -11   5   1    0.12    0.06
 -10  -5   1   19.49    0.56
  10  -5  -1   20.44    0.58
 -10  -5   1   21.22    0.57
 -10   5   1   19.60    0.45
  10   5  -1   20.28    0.55
 -10   5   1   20.50    0.55
 -10   5   1   19.65    0.45
  10   5  -1   20.00    0.59
  -9  -5   1    0.09    0.11
   9  -5  -1    0.09    0.11
  -9  -5   1   -0.10    0.09
   9   5  -1    0.05    0.10
  -9   5   1    0.10    0.07
  -9   5   1    0.00    0.09
   9   5  -1    0.12    0.12
   8  -5  -1    7.41    0.31
  -8  -5   1    7.34    0.29
  -8  -5   1    7.05    0.29
   8   5  -1    6.93    0.29
  -8   5   1    7.40    0.29
   8   5  -1    7.05    0.30
  -7  -5   1    0.12    0.09
  -7  -5   1    0.07    0.10
   7  -5  -1   -0.10    0.09
   7   5  -1   -0.19    0.08
   7   5  -1    0.02    0.08
  -6  -5   1    0.61    0.12
  -6  -5   1    0.82    0.12
   6  -5  -1    0.63    0.12
   6   5  -1    0.49    0.11
   6   5  -1    0.57    0.12
   5  -5  -1   13.50    0.40
  -5  -5   1   13.67    0.40
  -5  -5   1   13.48    0.39
   5   5  -1   13.02    0.40
  -4  -5   1  100.95    1.98
  -4  -5   1   97.76    2.00
   4  -5  -1   97.60    2.00
   4   5  -1  100.28    2.01
  -3  -5   1  119.49    2.36
   3  -5  -1  117.99    2.38
  -3  -5   1  121.28    2.39
   3   5  -1  121.32    2.39
  -2  -5   1    8.94    0.28
  -2  -5   1    8.79    0.30
   2  -5  -1    8.75    0.29
  -2   5   1    8.81    0.30
   2   5  -1    8.72    0.22
   2   5  -1    8.64    0.30
   1  -5  -1   43.81    0.95
  -1  -5   1   43.01    0.95
   1   5  -1   42.92    0.94
   1   5  -1   43.53    0.88
  -1   5   1   42.58    0.94
   0  -5   1   11.67    0.32
   0  -5  -1   11.70    0.35
   0  -5   1   10.43    0.34
   0   5  -1   11.33    0.34
   0   5   1   11.49    0.35
  -1  -5  -1   32.68    0.76
   1  -5   1   33.98    0.76
   1   5   1   33.10    0.76
   1   5   1   33.07    0.76
  -1   5  -1   33.62    0.76
  -2  -5  -1   10.29    0.33
   2  -5   1    9.96    0.32
  -2   5  -1    9.42    0.30
   2   5   1    9.96    0.33
   2   5   1   10.31    0.32
   2   5   1   10.18    0.23
   3  -5   1    7.01    0.27
  -3  -5  -1    7.56    0.28
   3   5   1    7.14    0.28
   3   5   1    7.32    0.28
  -4  -5  -1   97.30    1.95
   4  -5   1   95.08    1.94
   4   5   1   96.37    1.95
   4   5   1   97.25    1.96
  -5  -5  -1    4.84    0.22
   5  -5   1    5.32    0.24
  -5  -5  -1    5.31    0.24
   5   5   1    5.39    0.24
   5   5   1    4.77    0.24
  -6  -5  -1   12.72    0.37
  -6  -5  -1   13.02    0.39
   6  -5   1   12.21    0.38
   6   5   1   12.36    0.39
   6   5   1   11.65    0.38
  -7  -5  -1    0.04    0.09
   7  -5   1    0.12    0.10
  -7  -5  -1    0.10    0.08
   7   5   1    0.10    0.10
  -7   5  -1    0.07    0.08
   7   5   1    0.10    0.10
  -8  -5  -1    1.62    0.16
   8  -5   1    1.21    0.15
  -8  -5  -1    1.37    0.15
  -8   5  -1    1.70    0.15
   8   5   1    1.62    0.18
   8   5   1    1.24    0.15
   9  -5   1    5.87    0.28
  -9  -5  -1    5.25    0.26
  -9  -5  -1    5.30    0.26
  -9   5  -1    4.97    0.23
   9   5   1    5.59    0.29
   9   5   1    5.36    0.27
  10  -5   1    6.43    0.30
 -10  -5  -1    6.20    0.29
 -10  -5  -1    6.41    0.30
  10   5   1    7.40    0.33
  10   5   1    6.67    0.30
 -11  -5  -1    0.43    0.13
  11  -5   1    0.29    0.14
  11   5   1    0.39    0.13
  11   5   1    0.35    0.15
  12  -5   1    2.54    0.23
 -12  -5  -1    2.30    0.20
  12   5   1    2.76    0.22
  12   5   1    2.55    0.24
  13  -5   1    0.73    0.17
 -13  -5  -1    0.63    0.15
  13   5   1    0.61    0.17
  13   5   1    0.46    0.14
  14  -5   1    0.33    0.15
 -14  -5  -1    0.13    0.12
  14   5   1    0.31    0.13
  14   5   1    0.20    0.16
 -15  -5  -1    0.37    0.15
  15  -5   1    0.59    0.17
  15   5   1    0.35    0.18
  15   5   1    0.66    0.15
 -16  -5  -1   -0.13    0.12
  16  -5   1    0.05    0.16
  16   5   1    0.07    0.16
  17  -5   1    0.72    0.21
 -17  -5  -1    0.81    0.19
  17   5   1    0.75    0.22
 -18  -5  -1    1.15    0.25
  18  -5   1    1.13    0.24
  18   5   1    1.39    0.26
  19  -5   1    2.87    0.33
  19   5   1    2.61    0.32
  19  -6  -1    0.77    0.25
  19   6  -1    1.71    0.30
  18  -6  -1    0.15    0.20
  18   6  -1    0.30    0.22
  17  -6  -1    1.30    0.25
  17   6  -1    1.33    0.26
  16  -6  -1   -0.04    0.18
  16   6  -1    0.52    0.21
  15  -6  -1    1.14    0.22
  15   6  -1    0.76    0.17
  15   6  -1    1.10    0.23
  14  -6  -1    1.65    0.23
 -14  -6   1    1.07    0.17
  14   6  -1    1.36    0.19
  14   6  -1    2.06    0.25
 -13  -6   1    0.05    0.13
  13  -6  -1   -0.07    0.14
  13   6  -1    0.06    0.15
  13   6  -1    0.30    0.14
 -12  -6   1    1.83    0.19
  12  -6  -1    1.81    0.22
  12   6  -1    1.98    0.20
  12   6  -1    2.65    0.26
 -11  -6   1    4.20    0.27
  11  -6  -1    4.15    0.29
 -11  -6   1    4.41    0.28
  11   6  -1    4.36    0.30
  11   6  -1    4.06    0.26
 -11   6   1    4.34    0.18
  10  -6  -1    0.78    0.16
 -10  -6   1    0.84    0.14
 -10  -6   1    1.01    0.16
 -10   6   1    0.83    0.15
 -10   6   1    0.74    0.10
  10   6  -1    0.94    0.19
  10   6  -1    1.19    0.18
   9  -6  -1    0.18    0.14
  -9  -6   1    0.35    0.13
  -9  -6   1    0.36    0.12
   9   6  -1    0.08    0.14
   9   6  -1    0.29    0.14
  -9   6   1    0.29    0.09
  -9   6   1    0.21    0.11
  -8  -6   1    0.34    0.12
  -8  -6   1    0.22    0.13
   8  -6  -1   -0.08    0.12
   8   6  -1    0.22    0.14
  -8   6   1    0.20    0.11
   8   6  -1    0.31    0.11
  -7  -6   1    6.44    0.29
   7  -6  -1    6.20    0.30
  -7  -6   1    6.36    0.30
   7   6  -1    6.44    0.31
   7   6  -1    6.19    0.29
  -6  -6   1    2.59    0.20
   6  -6  -1    2.51    0.20
  -6  -6   1    2.28    0.20
   6   6  -1    2.42    0.22
   6   6  -1    2.23    0.19
   5  -6  -1   23.36    0.61
  -5  -6   1   23.39    0.62
  -5  -6   1   23.24    0.59
   5   6  -1   22.88    0.62
   4  -6  -1   60.99    1.33
  -4  -6   1   63.77    1.34
  -4  -6   1   61.39    1.31
   4   6  -1   61.96    1.35
  -3  -6   1    5.41    0.25
  -3  -6   1    5.46    0.24
   3  -6  -1    5.37    0.25
   3   6  -1    6.21    0.28
  -2  -6   1   29.62    0.72
  -2  -6   1   27.77    0.68
   2  -6  -1   29.65    0.72
   2   6  -1   29.93    0.72
  -2   6   1   30.51    0.72
   2   6  -1   29.57    0.62
  -1  -6   1    1.43    0.16
   1  -6  -1    1.36    0.16
   1   6  -1    1.19    0.14
  -1   6   1    1.53    0.16
   0  -6   1   26.43    0.62
   0  -6   1   25.88    0.65
   0  -6  -1   26.13    0.65
   0   6  -1   26.34    0.65
   0   6   1   26.41    0.65
   0   6   1   25.25    0.63
   1  -6   1    3.30    0.20
  -1  -6  -1    4.03    0.22
   1   6   1    4.24    0.17
   1   6   1    4.11    0.22
  -1   6  -1    4.34    0.22
   1   6   1    3.73    0.21
   2  -6   1    0.04    0.08
  -2  -6  -1   -0.08    0.10
   2   6   1   -0.06    0.09
  -2   6  -1   -0.06    0.09
   2   6   1   -0.02    0.04
   2   6   1   -0.01    0.10
  -3  -6  -1    4.88    0.24
   3  -6   1    5.16    0.24
   3   6   1    5.59    0.26
   3   6   1    4.99    0.26
   3   6   1    5.09    0.13
   4  -6   1   13.32    0.41
  -4  -6  -1   12.27    0.38
  -4  -6  -1   13.39    0.40
   4   6   1   12.14    0.40
   4   6   1   12.93    0.41
   5  -6   1    3.09    0.22
  -5  -6  -1    3.02    0.20
  -5  -6  -1    3.17    0.22
   5   6   1    3.08    0.23
   5   6   1    3.32    0.23
  -6  -6  -1    1.77    0.17
   6  -6   1    1.68    0.16
  -6  -6  -1    1.41    0.14
   6   6   1    2.16    0.20
   6   6   1    1.89    0.18
   7  -6   1    0.17    0.12
  -7  -6  -1    0.01    0.10
  -7  -6  -1    0.03    0.09
   7   6   1    0.04    0.10
   7   6   1    0.06    0.12
   8  -6   1    2.91    0.23
  -8  -6  -1    3.04    0.22
  -8  -6  -1    2.47    0.21
   8   6   1    3.08    0.25
   8   6   1    2.74    0.21
  -8   6  -1    2.40    0.18
   9  -6   1    0.55    0.14
  -9  -6  -1    0.32    0.12
  -9  -6  -1    0.62    0.14
  -9   6  -1    0.43    0.12
   9   6   1    0.44    0.13
   9   6   1    0.28    0.14
 -10  -6  -1   10.95    0.40
 -10  -6  -1   10.49    0.41
  10  -6   1   11.25    0.42
  10   6   1   10.53    0.40
  10   6   1   10.07    0.42
 -11  -6  -1    7.38    0.34
  11  -6   1    7.05    0.34
  11   6   1    6.68    0.33
  11   6   1    7.11    0.36
  12  -6   1    2.73    0.25
 -12  -6  -1    2.31    0.21
  12   6   1    2.98    0.27
  12   6   1    2.58    0.23
  13  -6   1    0.30    0.17
 -13  -6  -1    0.07    0.12
  13   6   1    0.23    0.13
  13   6   1    0.40    0.16
  14  -6   1   -0.02    0.15
 -14  -6  -1    0.11    0.14
  14   6   1    0.12    0.16
  14   6   1   -0.09    0.12
  15  -6   1    0.07    0.17
 -15  -6  -1   -0.08    0.14
  15   6   1    0.04    0.17
  15   6   1   -0.07    0.13
  16  -6   1    0.36    0.18
 -16  -6  -1    0.26    0.15
  16   6   1    0.58    0.21
  17  -6   1    0.21    0.20
  17   6   1    0.74    0.23
  18  -6   1   -0.04    0.20
  18   6   1    0.09    0.21
  19  -6   1    2.64    0.33
  19   6   1    2.46    0.33
  18  -7  -1    0.49    0.24
  18   7  -1    0.06    0.22
  17  -7  -1   -0.09    0.19
  17   7  -1    0.12    0.21
  16  -7  -1    0.11    0.19
  16   7  -1    0.20    0.18
  16   7  -1   -0.09    0.19
  15  -7  -1    0.58    0.20
  15   7  -1    0.36    0.17
  15   7  -1    0.28    0.20
  14  -7  -1    0.35    0.18
  14   7  -1    0.42    0.18
  14   7  -1    0.11    0.14
  13  -7  -1    1.68    0.23
  13   7  -1    2.12    0.23
  13   7  -1    1.72    0.25
  12  -7  -1   -0.03    0.15
 -12  -7   1   -0.02    0.13
  12   7  -1   -0.07    0.15
  12   7  -1    0.09    0.14
  11  -7  -1    1.01    0.19
 -11  -7   1    0.78    0.17
 -11  -7   1    0.99    0.19
  11   7  -1    1.35    0.22
  11   7  -1    0.84    0.17
 -10  -7   1    0.78    0.17
 -10  -7   1    1.02    0.17
  10  -7  -1    0.59    0.18
  10   7  -1    0.58    0.15
 -10   7   1    0.81    0.12
  10   7  -1    0.63    0.19
  -9  -7   1    0.26    0.15
   9  -7  -1    0.41    0.16
  -9  -7   1    0.61    0.15
   9   7  -1    0.47    0.16
  -9   7   1    0.25    0.10
  -9   7   1    0.41    0.13
   9   7  -1    0.20    0.14
   8  -7  -1    5.76    0.32
  -8  -7   1    5.79    0.32
  -8  -7   1    5.78    0.30
   8   7  -1    5.69    0.31
  -8   7   1    4.89    0.25
   8   7  -1    5.42    0.33
  -7  -7   1    2.06    0.20
   7  -7  -1    1.77    0.20
  -7  -7   1    1.68    0.19
   7   7  -1    2.03    0.21
   7   7  -1    1.70    0.20
  -7   7   1    1.78    0.17
   6  -7  -1    0.15    0.11
  -6  -7   1    0.29    0.14
  -6  -7   1    0.22    0.11
   6   7  -1    0.20    0.14
   6   7  -1    0.30    0.13
  -5  -7   1   14.77    0.46
   5  -7  -1   14.78    0.48
  -5  -7   1   15.54    0.49
   5   7  -1   14.64    0.49
   5   7  -1   16.05    0.49
  -4  -7   1    9.07    0.35
   4  -7  -1    8.50    0.35
  -4  -7   1    9.14    0.33
   4   7  -1    8.89    0.35
  -3  -7   1    0.14    0.12
  -3  -7   1    0.00    0.07
   3  -7  -1    0.00    0.10
   3   7  -1   -0.26    0.09
   2  -7  -1    3.62    0.23
  -2  -7   1    3.69    0.20
  -2  -7   1    3.90    0.23
   2   7  -1    3.82    0.24
  -2   7   1    3.83    0.25
  -2   7   1    3.46    0.22
  -1  -7   1    1.32    0.17
   1  -7  -1    1.16    0.15
  -1   7   1    1.28    0.16
  -1   7   1    1.46    0.16
   1   7  -1    1.82    0.19
   0  -7   1   16.18    0.49
   0  -7  -1   17.15    0.50
   0  -7   1   16.31    0.45
   0   7   1   16.15    0.49
   0   7   1   16.34    0.49
   0   7  -1   16.61    0.50
   1  -7   1   15.55    0.47
  -1  -7  -1   15.78    0.48
   1   7   1   15.00    0.46
  -1   7  -1   15.16    0.46
   1   7   1   15.56    0.48
   2  -7   1    2.34    0.21
  -2  -7  -1    2.29    0.20
   2   7   1    2.35    0.11
   2   7   1    2.08    0.20
  -2   7  -1    2.80    0.22
   2   7   1    2.74    0.21
   3  -7   1   37.25    0.90
  -3  -7  -1   37.40    0.90
  -3  -7  -1   37.71    0.88
   3   7   1   37.77    0.90
   3   7   1   38.87    0.92
   3   7   1   36.19    0.74
   4  -7   1   11.22    0.40
  -4  -7  -1   11.68    0.41
  -4  -7  -1   11.30    0.38
   4   7   1   10.89    0.40
   4   7   1   11.19    0.40
  -5  -7  -1    0.74    0.15
   5  -7   1    0.42    0.14
  -5  -7  -1    0.60    0.13
   5   7   1    0.52    0.14
   5   7   1    0.65    0.15
   6  -7   1    0.67    0.15
  -6  -7  -1    0.87    0.16
  -6  -7  -1    0.68    0.13
   6   7   1    0.80    0.16
   6   7   1    0.61    0.15
  -7  -7  -1    8.74    0.37
   7  -7   1    8.46    0.37
  -7  -7  -1    7.97    0.34
   7   7   1    9.05    0.36
   7   7   1    9.15    0.39
   8  -7   1    1.04    0.18
  -8  -7  -1    1.30    0.16
  -8  -7  -1    0.85    0.17
   8   7   1    1.16    0.20
   8   7   1    1.27    0.19
  -9  -7  -1   17.75    0.54
   9  -7   1   17.34    0.56
  -9  -7  -1   17.51    0.56
   9   7   1   17.39    0.56
   9   7   1   17.92    0.58
  10  -7   1   -0.09    0.14
 -10  -7  -1    0.02    0.12
 -10  -7  -1    0.20    0.23
  10   7   1    0.07    0.14
  10   7   1   -0.09    0.13
 -11  -7  -1    2.80    0.25
  11  -7   1    2.42    0.24
  11   7   1    2.33    0.24
  11   7   1    2.05    0.24
 -12  -7  -1    0.22    0.13
  12  -7   1    0.10    0.16
  12   7   1    0.07    0.14
  12   7   1    0.09    0.16
  13  -7   1    0.36    0.17
 -13  -7  -1    0.01    0.12
  13   7   1    0.30    0.16
  13   7   1   -0.14    0.15
  14  -7   1    1.98    0.26
 -14  -7  -1    1.18    0.24
  14   7   1    2.35    0.28
  14   7   1    1.86    0.24
  15  -7   1    0.26    0.19
  15   7   1    0.37    0.20
  15   7   1    0.25    0.16
  16  -7   1   -0.22    0.17
  16   7   1    0.09    0.20
  17  -7   1    1.24    0.26
  17   7   1    1.28    0.28
  18  -7   1    0.98    0.25
  18   7   1    1.01    0.26
  18  -8  -1    0.32    0.24
  18   8  -1    0.31    0.25
  17  -8  -1    0.27    0.23
  17   8  -1    0.90    0.27
  16  -8  -1    0.03    0.21
  16   8  -1   -0.43    0.19
  16   8  -1   -0.02    0.17
  15  -8  -1    0.02    0.19
  15   8  -1    0.02    0.17
  15   8  -1    0.26    0.21
  14  -8  -1   -0.19    0.17
  14   8  -1   -0.16    0.18
  14   8  -1    0.00    0.15
  13  -8  -1    0.63    0.20
  13   8  -1    0.69    0.19
  13   8  -1    0.79    0.22
  12  -8  -1   -0.02    0.15
  12   8  -1    0.12    0.18
  12   8  -1    0.26    0.16
  11  -8  -1    4.42    0.34
  11   8  -1    4.77    0.36
  11   8  -1    4.46    0.32
  10  -8  -1    2.03    0.25
 -10  -8   1    0.77    0.20
  10   8  -1    1.73    0.23
 -10   8   1    1.30    0.15
  10   8  -1    1.31    0.21
   9  -8  -1    3.65    0.30
  -9  -8   1    3.48    0.30
  -9   8   1    3.51    0.22
   9   8  -1    3.62    0.31
   9   8  -1    3.34    0.28
   8  -8  -1    3.44    0.27
  -8  -8   1    3.54    0.29
   8   8  -1    3.59    0.31
   8   8  -1    3.42    0.27
  -8   8   1    3.76    0.24
  -7  -8   1   13.83    0.50
   7  -8  -1   12.58    0.49
   7   8  -1   14.55    0.51
  -7   8   1   12.99    0.43
   7   8  -1   13.92    0.50
  -6  -8   1    3.75    0.39
   6  -8  -1    4.26    0.30
  -6  -8   1    4.64    0.31
  -6   8   1    3.97    0.26
   6   8  -1    4.06    0.31
   6   8  -1    5.06    0.33
  -5  -8   1    7.48    0.35
  -5  -8   1    8.05    0.41
   5  -8  -1    7.24    0.36
   5   8  -1    8.05    0.37
  -5   8   1    7.63    0.33
   5   8  -1    7.31    0.38
   4  -8  -1    0.52    0.16
  -4  -8   1    0.83    0.17
  -4  -8   1    0.82    0.18
  -4   8   1    0.60    0.14
   4   8  -1    0.54    0.16
   4   8  -1    0.63    0.17
  -3  -8   1    4.65    0.42
  -3  -8   1    3.81    0.29
   3  -8  -1    3.65    0.26
  -3   8   1    3.57    0.25
   3   8  -1    3.33    0.27
  -2  -8   1    0.10    0.13
   2  -8  -1    0.22    0.15
  -2   8   1    0.12    0.12
   2   8  -1    0.33    0.15
  -2   8   1    0.16    0.12
   1  -8  -1    9.84    0.40
  -1  -8   1    9.76    0.40
   1   8  -1    8.89    0.37
  -1   8   1    9.58    0.37
  -1   8   1    9.82    0.40
   0  -8   1    7.06    0.33
   0  -8  -1    7.12    0.33
   0   8  -1    6.81    0.32
   0   8   1    7.05    0.33
   0   8   1    6.73    0.33
   1  -8   1    3.17    0.24
  -1  -8  -1    3.07    0.26
   1   8   1    3.95    0.25
   1   8   1    3.57    0.28
  -1   8  -1    3.08    0.26
  -2  -8  -1    0.32    0.12
  -2  -8  -1    0.19    0.15
   2  -8   1    0.51    0.15
   2   8   1    0.34    0.14
  -2   8  -1    0.33    0.14
   2   8   1    0.35    0.15
   3  -8   1    0.88    0.17
  -3  -8  -1    0.63    0.17
  -3  -8  -1    0.70    0.15
   3   8   1    0.69    0.16
   3   8   1    0.66    0.16
  -4  -8  -1    2.21    0.21
   4  -8   1    2.26    0.22
  -4  -8  -1    2.34    0.23
   4   8   1    1.97    0.22
   4   8   1    2.16    0.22
   5  -8   1    3.01    0.26
  -5  -8  -1    2.27    0.23
  -5  -8  -1    2.15    0.20
   5   8   1    2.43    0.25
   5   8   1    2.49    0.23
  -6  -8  -1   18.80    0.57
  -6  -8  -1   18.98    0.59
   6  -8   1   18.95    0.58
   6   8   1   20.26    0.62
   6   8   1   18.82    0.60
  -7  -8  -1    2.69    0.25
  -7  -8  -1    2.51    0.23
   7  -8   1    2.15    0.23
   7   8   1    2.93    0.27
   7   8   1    2.34    0.24
  -8  -8  -1    0.38    0.14
  -8  -8  -1    0.62    0.17
   8  -8   1    0.60    0.17
   8   8   1    0.52    0.18
   8   8   1    0.46    0.18
  -9  -8  -1    2.22    0.24
  -9  -8  -1    2.27    0.24
   9  -8   1    2.44    0.25
   9   8   1    2.12    0.24
   9   8   1    2.78    0.28
 -10  -8  -1    0.06    0.14
  10  -8   1    0.01    0.15
  10   8   1   -0.25    0.14
  10   8   1    0.01    0.16
  11  -8   1    0.52    0.19
  11   8   1    0.02    0.17
  11   8   1    0.42    0.17
  12  -8   1    0.23    0.18
  12   8   1    0.59    0.19
  12   8   1    0.65    0.18
  13  -8   1    0.09    0.18
  13   8   1    0.39    0.17
  13   8   1    0.15    0.18
  14  -8   1    0.41    0.21
  14   8   1    0.58    0.22
  14   8   1    0.52    0.18
  15  -8   1    1.74    0.27
  15   8   1    1.27    0.23
  15   8   1    1.56    0.28
  16  -8   1    0.62    0.23
  16   8   1    0.31    0.23
  16   8   1    0.23    0.20
  17  -8   1    0.19    0.21
  17   8   1   -0.27    0.22
  17  -9  -1    0.62    0.26
  17   9  -1    0.86    0.28
  16  -9  -1    0.32    0.23
  16   9  -1    0.01    0.18
  16   9  -1    0.07    0.22
  15  -9  -1    0.18    0.22
  15   9  -1    0.28    0.19
  15   9  -1    0.05    0.21
  14  -9  -1    0.41    0.22
  14   9  -1    0.02    0.18
  14   9  -1    0.12    0.18
  13  -9  -1    1.45    0.26
  13   9  -1    1.15    0.22
  13   9  -1    1.21    0.28
  12  -9  -1    0.00    0.18
  12   9  -1    0.17    0.21
  12   9  -1    0.03    0.14
  11  -9  -1   -0.09    0.17
  11   9  -1    0.23    0.17
  11   9  -1    0.17    0.17
  10  -9  -1    0.00    0.17
 -10  -9   1    0.24    0.19
  10   9  -1    0.23    0.18
  10   9  -1    0.25    0.19
   9  -9  -1    0.05    0.17
  -9  -9   1    0.31    0.18
   9   9  -1    0.09    0.16
   9   9  -1   -0.20    0.15
  -9   9   1   -0.03    0.12
   8  -9  -1    0.10    0.17
  -8  -9   1    0.06    0.15
  -8   9   1   -0.04    0.12
   8   9  -1    0.07    0.15
   8   9  -1    0.05    0.15
   7  -9  -1    0.67    0.18
  -7  -9   1    0.57    0.18
   7   9  -1    0.62    0.18
  -7   9   1    0.70    0.15
   7   9  -1    0.68    0.20
   6  -9  -1    1.48    0.23
  -6  -9   1    1.54    0.22
   6   9  -1    1.43    0.22
   6   9  -1    1.85    0.24
  -6   9   1    2.04    0.20
   5  -9  -1    0.21    0.15
  -5  -9   1    0.09    0.14
  -5   9   1    0.04    0.13
   5   9  -1    0.23    0.15
   5   9  -1    0.35    0.18
  -4  -9   1    3.59    0.30
   4  -9  -1    2.99    0.28
  -4   9   1    4.03    0.28
   4   9  -1    3.96    0.32
   4   9  -1    3.85    0.29
  -3  -9   1    7.88    0.38
   3  -9  -1    7.45    0.39
  -3   9   1    8.82    0.38
   3   9  -1    8.54    0.39
   3   9  -1    8.62    0.39
  -2  -9   1    2.26    0.24
   2  -9  -1    1.99    0.23
  -2   9   1    1.92    0.21
   2   9  -1    2.10    0.23
  -2   9   1    2.10    0.23
   1  -9  -1   13.53    0.51
  -1  -9   1   12.92    0.50
   1   9  -1   13.01    0.50
  -1   9   1   12.88    0.48
  -1   9   1   13.63    0.47
   0  -9  -1    0.34    0.18
   0  -9   1    0.32    0.15
   0   9   1    0.15    0.14
   0   9   1    0.28    0.14
   0   9  -1    0.25    0.16
   1  -9   1   28.28    0.79
  -1  -9  -1   27.56    0.77
  -1   9  -1   28.60    0.77
   1   9   1   27.70    0.79
   1   9   1   27.63    0.77
   2  -9   1   -0.12    0.14
  -2  -9  -1    0.06    0.15
   2   9   1    0.03    0.15
   2   9   1   -0.12    0.13
  -2   9  -1   -0.09    0.14
  -3  -9  -1    0.69    0.18
   3  -9   1    0.49    0.18
   3   9   1    0.81    0.19
   3   9   1    0.96    0.20
   4  -9   1    2.61    0.26
  -4  -9  -1    2.10    0.23
   4   9   1    2.36    0.24
   4   9   1    2.32    0.26
  -5  -9  -1    0.04    0.13
   5  -9   1   -0.12    0.15
   5   9   1    0.16    0.17
   5   9   1    0.02    0.14
   6  -9   1    0.14    0.16
  -6  -9  -1    0.10    0.15
   6   9   1   -0.02    0.14
   6   9   1   -0.07    0.16
   7  -9   1    0.17    0.16
  -7  -9  -1   -0.01    0.15
   7   9   1    0.19    0.17
   7   9   1   -0.06    0.16
  -8  -9  -1    0.54    0.18
   8  -9   1    0.33    0.18
   8   9   1    0.42    0.18
   8   9   1    0.07    0.17
   9  -9   1   -0.14    0.15
   9   9   1   -0.17    0.17
   9   9   1   -0.09    0.15
  10  -9   1    0.08    0.18
  10   9   1   -0.14    0.16
  10   9   1    0.06    0.17
  11  -9   1    1.68    0.25
  11   9   1    1.69    0.25
  11   9   1    1.71    0.27
  12  -9   1    1.83    0.27
  12   9   1    2.10    0.27
  12   9   1    1.93    0.29
  13  -9   1    0.29    0.21
  13   9   1    0.10    0.18
  13   9   1    0.40    0.22
  14  -9   1   -0.18    0.20
  14   9   1    0.02    0.19
  14   9   1    0.18    0.18
  15  -9   1   -0.28    0.19
  15   9   1   -0.23    0.21
  15   9   1   -0.05    0.17
  16  -9   1   -0.13    0.20
  16   9   1   -0.39    0.21
  16   9   1   -0.15    0.18
  15 -10  -1    0.15    0.23
  15  10  -1    0.42    0.21
  15  10  -1    0.37    0.25
  14 -10  -1   -0.03    0.21
  14  10  -1   -0.03    0.22
  14  10  -1    0.02    0.18
  13 -10  -1    0.08    0.22
  13  10  -1    0.22    0.20
  13  10  -1    0.46    0.25
  12 -10  -1   -0.01    0.20
  12  10  -1   -0.07    0.15
  12  10  -1    0.41    0.24
  11 -10  -1    0.27    0.22
  11  10  -1   -0.25    0.17
  11  10  -1    0.03    0.19
  10 -10  -1    0.53    0.21
  10  10  -1    0.39    0.20
  10  10  -1    0.62    0.23
   9 -10  -1    0.36    0.21
  -9 -10   1    0.47    0.20
   9  10  -1    0.43    0.21
  -9  10   1    0.52    0.16
   9  10  -1    0.60    0.20
  -8 -10   1    2.08    0.26
   8 -10  -1    1.72    0.26
  -8  10   1    1.42    0.20
   8  10  -1    2.47    0.31
   8  10  -1    2.17    0.28
  -7 -10   1    3.18    0.30
   7 -10  -1    2.56    0.28
  -7  10   1    2.99    0.25
   7  10  -1    2.41    0.27
   7  10  -1    3.12    0.32
  -6 -10   1    0.27    0.17
   6 -10  -1    0.19    0.16
  -6  10   1    0.05    0.14
   6  10  -1    0.39    0.19
   6  10  -1    0.23    0.19
  -5 -10   1    4.19    0.35
   5 -10  -1    3.38    0.31
   5  10  -1    4.26    0.35
  -5  10   1    3.68    0.29
   5  10  -1    4.15    0.36
   4 -10  -1    4.33    0.35
  -4 -10   1    4.07    0.34
   4  10  -1    4.60    0.33
  -4  10   1    3.83    0.30
   4  10  -1    4.09    0.35
   3 -10  -1    0.03    0.15
  -3 -10   1   -0.08    0.14
  -3  10   1    0.28    0.16
   3  10  -1   -0.03    0.17
   3  10  -1    0.06    0.17
  -2 -10   1    1.66    0.23
   2 -10  -1    1.97    0.24
   2  10  -1    1.71    0.23
   2  10  -1    1.85    0.23
  -2  10   1    2.19    0.23
  -1 -10   1   -0.12    0.14
   1 -10  -1   -0.06    0.15
   1  10  -1    0.15    0.15
  -1  10   1   -0.11    0.16
   1  10  -1    0.00    0.14
  -1  10   1   -0.05    0.15
   0 -10   1    5.10    0.36
   0 -10  -1    5.05    0.36
   0  10  -1    4.73    0.32
   0  10   1    4.37    0.31
   0  10   1    4.97    0.33
   0  10  -1    5.25    0.35
   1 -10   1    3.52    0.31
  -1 -10  -1    3.36    0.30
  -1  10  -1    3.66    0.31
   1  10   1    3.48    0.30
   1  10   1    3.44    0.31
  -2 -10  -1    0.02    0.17
   2 -10   1   -0.15    0.16
  -2  10  -1    0.20    0.16
   2  10   1   -0.15    0.13
   2  10   1   -0.11    0.16
   3 -10   1    0.14    0.18
  -3 -10  -1    0.13    0.16
   3  10   1    0.12    0.16
   3  10   1    0.25    0.18
  -4 -10  -1    0.15    0.18
   4 -10   1    0.13    0.17
   4  10   1    0.40    0.17
   4  10   1    0.20    0.18
   5 -10   1    0.56    0.20
  -5 -10  -1    0.35    0.18
   5  10   1    0.71    0.19
   5  10   1    0.75    0.22
   6 -10   1    1.52    0.25
  -6 -10  -1    1.59    0.25
   6  10   1    1.35    0.22
   6  10   1    1.43    0.23
   7 -10   1   -0.02    0.16
  -7 -10  -1   -0.12    0.16
   7  10   1    0.03    0.17
  -7  10  -1   -0.26    0.13
   7  10   1    0.28    0.20
   8 -10   1    0.24    0.19
   8  10   1    0.30    0.20
  -8  10  -1    0.10    0.14
   8  10   1    0.30    0.19
   9 -10   1    0.79    0.23
  -9  10  -1    0.01    0.14
   9  10   1    0.35    0.21
   9  10   1    0.18    0.19
  10 -10   1    2.81    0.32
  10  10   1    2.65    0.29
  10  10   1    2.49    0.31
  11 -10   1    0.16    0.20
  11  10   1   -0.06    0.18
  11  10   1   -0.26    0.20
  12 -10   1    1.57    0.28
  12  10   1    1.76    0.29
  12  10   1    1.75    0.28
  13 -10   1    0.39    0.23
  13  10   1    0.47    0.20
  13  10   1    0.98    0.28
  14 -10   1    3.34    0.36
  14  10   1    3.10    0.33
  14  10   1    2.93    0.36
  15 -10   1    1.06    0.28
  15  10   1    1.05    0.25
  15  10   1    1.08    0.30
  14 -11  -1    0.59    0.26
  14  11  -1    0.31    0.21
  14  11  -1    0.58    0.28
  13 -11  -1    0.82    0.27
  13  11  -1    0.86    0.23
  13  11  -1    0.50    0.28
  12 -11  -1    0.99    0.27
  12  11  -1    0.32    0.25
  12  11  -1    0.57    0.23
  11 -11  -1    1.13    0.28
  11  11  -1    0.46    0.26
  11  11  -1    0.57    0.23
  10 -11  -1    0.35    0.23
  10  11  -1    0.74    0.25
  10  11  -1    0.33    0.21
   9 -11  -1    0.19    0.23
   9  11  -1    0.10    0.22
   9  11  -1    0.34    0.20
   8 -11  -1    0.88    0.25
  -8 -11   1    0.82    0.22
   8  11  -1    0.90    0.26
   8  11  -1    1.05    0.25
  -8  11   1    0.67    0.18
  -7 -11   1    0.11    0.20
   7 -11  -1    0.22    0.19
   7  11  -1    0.29    0.23
   7  11  -1    0.25    0.18
  -7  11   1   -0.45    0.13
  -6 -11   1    0.46    0.21
   6 -11  -1    0.74    0.23
   6  11  -1    0.56    0.20
   6  11  -1    0.47    0.23
  -6  11   1    0.48    0.17
  -5 -11   1    0.26    0.19
   5 -11  -1    0.22    0.18
  -5  11   1    0.24    0.17
   5  11  -1    0.11    0.19
   5  11  -1    0.15    0.20
  -4 -11   1    0.44    0.20
   4 -11  -1    0.63    0.22
   4  11  -1    0.72    0.23
  -4  11   1    0.94    0.19
   4  11  -1    0.49    0.19
  -3 -11   1    0.27    0.18
   3 -11  -1    0.06    0.19
  -3  11   1    0.25    0.16
   3  11  -1    0.04    0.16
   3  11  -1    0.39    0.20
   2 -11  -1   -0.05    0.16
  -2 -11   1    0.32    0.20
  -2  11   1   -0.35    0.14
   2  11  -1    0.16    0.18
   2  11  -1    0.00    0.17
   1 -11  -1   -0.18    0.18
  -1 -11   1    0.03    0.18
   1  11  -1    0.14    0.16
  -1  11   1    0.08    0.17
  -1  11   1    0.13    0.16
   1  11  -1    0.19    0.16
   0 -11   1    1.88    0.27
   0 -11  -1    1.67    0.27
   0  11   1    1.63    0.25
   0  11   1    1.60    0.26
   0  11  -1    1.62    0.25
   0  11  -1    1.07    0.23
   1 -11   1    0.53    0.21
  -1 -11  -1    0.05    0.19
   1  11   1    0.52    0.21
   1  11   1    0.65    0.19
  -1  11  -1    0.74    0.21
  -1  11  -1    0.70    0.21
  -2 -11  -1    0.43    0.18
   2 -11   1    0.52    0.21
  -2  11  -1    0.67    0.18
   2  11   1    0.59    0.21
   2  11   1    0.73    0.23
  -3 -11  -1    0.14    0.18
   3 -11   1    0.04    0.19
  -3  11  -1   -0.15    0.16
   3  11   1    0.31    0.19
   3  11   1   -0.04    0.18
  -4 -11  -1    0.21    0.17
   4 -11   1    0.56    0.20
   4  11   1    0.22    0.21
   4  11   1    0.08    0.19
  -4  11  -1   -0.05    0.16
   5 -11   1    0.04    0.19
  -5 -11  -1    0.09    0.18
   5  11   1    0.02    0.20
  -5  11  -1   -0.04    0.15
   5  11   1   -0.04    0.16
   6 -11   1    1.04    0.24
  -6 -11  -1    1.16    0.23
  -6  11  -1    0.79    0.20
   6  11   1    1.10    0.25
   6  11   1    0.83    0.24
   7 -11   1    3.00    0.33
   7  11   1    3.15    0.33
   7  11   1    2.93    0.33
  -7  11  -1    2.75    0.27
   8 -11   1    2.34    0.31
   8  11   1    2.09    0.30
   8  11   1    2.05    0.31
  -8  11  -1    1.66    0.22
   9 -11   1   -0.07    0.19
   9  11   1    0.13    0.18
   9  11   1   -0.05    0.20
  10 -11   1   -0.01    0.21
  10  11   1   -0.06    0.21
  10  11   1    0.03    0.20
  11 -11   1    0.20    0.23
  11  11   1    0.74    0.24
  11  11   1    0.28    0.24
  12 -11   1   -0.22    0.21
  12  11   1    0.10    0.24
  12  11   1   -0.24    0.18
  13 -11   1    0.21    0.25
  13  11   1    0.18    0.24
  13  11   1    0.49    0.23
  12 -12  -1    0.15    0.25
  12  12  -1    0.12    0.26
  11 -12  -1   -0.13    0.23
  11  12  -1    0.25    0.22
  11  12  -1    0.61    0.28
  10 -12  -1    1.11    0.28
  10  12  -1    0.59    0.26
  10  12  -1    0.52    0.24
   9 -12  -1    0.01    0.24
   9  12  -1   -0.18    0.20
   9  12  -1   -0.03    0.20
   8 -12  -1    0.11    0.24
   8  12  -1   -0.48    0.19
   8  12  -1    0.61    0.26
  -7 -12   1    1.28    0.25
   7 -12  -1    1.42    0.30
  -7  12   1    1.48    0.24
   7  12  -1    1.95    0.30
   7  12  -1    2.65    0.34
   6 -12  -1    0.23    0.24
  -6 -12   1   -0.23    0.16
   6  12  -1   -0.03    0.19
   6  12  -1   -0.10    0.17
  -6  12   1   -0.09    0.16
   5 -12  -1    1.29    0.28
  -5 -12   1    1.38    0.27
   5  12  -1    1.43    0.28
  -5  12   1    1.21    0.23
   5  12  -1    1.67    0.29
   4 -12  -1    1.37    0.29
  -4 -12   1    1.27    0.27
   4  12  -1    0.98    0.24
   4  12  -1    1.33    0.25
  -4  12   1    1.71    0.26
  -3 -12   1   -0.30    0.19
   3 -12  -1   -0.01    0.21
   3  12  -1   -0.01    0.18
   3  12  -1   -0.10    0.17
  -3  12   1   -0.19    0.17
   2 -12  -1    0.29    0.23
  -2 -12   1    0.04    0.20
   2  12  -1    0.32    0.21
  -2  12   1    0.29    0.21
   2  12  -1    0.05    0.20
   1 -12  -1    1.14    0.27
  -1 -12   1    0.67    0.24
   1  12  -1    0.96    0.24
   1  12  -1    0.72    0.21
  -1  12   1    0.90    0.21
   0 -12  -1    0.03    0.21
   0 -12   1    0.11    0.19
   0  12  -1    0.13    0.20
   0  12   1   -0.05    0.17
   0  12  -1   -0.27    0.17
   0  12   1   -0.03    0.19
  -1 -12  -1    0.80    0.23
   1 -12   1    1.30    0.27
  -1  12  -1    1.42    0.25
  -1  12  -1    1.94    0.28
   1  12   1    1.53    0.26
   1  12   1    1.02    0.25
  -2 -12  -1    0.11    0.21
   2 -12   1   -0.30    0.20
  -2  12  -1   -0.09    0.18
   2  12   1   -0.31    0.19
   2  12   1   -0.19    0.16
   3 -12   1    0.10    0.22
  -3 -12  -1    0.15    0.20
  -3  12  -1    0.26    0.18
   3  12   1    0.33    0.23
   3  12   1    0.34    0.20
   4 -12   1    1.48    0.28
  -4 -12  -1    2.12    0.30
   4  12   1    1.55    0.29
   4  12   1    1.22    0.26
  -4  12  -1    1.57    0.25
   5 -12   1    0.60    0.24
  -5 -12  -1    0.90    0.24
   5  12   1    0.59    0.23
  -5  12  -1    0.66    0.20
   5  12   1    0.96    0.23
   6 -12   1    0.54    0.25
   6  12   1    0.66    0.25
  -6  12  -1    0.27    0.19
   6  12   1    0.86    0.24
   7 -12   1    1.27    0.28
   7  12   1    1.23    0.29
   7  12   1    1.18    0.24
  -7  12  -1    1.36    0.23
   8 -12   1    0.52    0.23
   8  12   1    0.77    0.28
   8  12   1    0.72    0.23
   9 -12   1    0.04    0.23
   9  12   1    0.64    0.28
   9  12   1    0.78    0.23
  10 -12   1    0.46    0.25
  10  12   1    0.93    0.26
  10  12   1    0.65    0.27
  11 -12   1    0.45    0.27
  11  12   1    0.62    0.29
  11  12   1    0.16    0.22
   9 -13  -1    0.14    0.26
   9  13  -1    1.20    0.32
   8 -13  -1    0.17    0.26
   8  13  -1   -0.05    0.23
   8  13  -1   -0.11    0.24
   7 -13  -1    3.00    0.38
   7  13  -1    2.36    0.34
  -7  13   1    2.47    0.41
   7  13  -1    2.49    0.34
  -6 -13   1   -0.24    0.20
   6 -13  -1   -0.40    0.22
  -6  13   1    0.18    0.19
   6  13  -1   -0.29    0.22
   6  13  -1   -0.06    0.23
  -5 -13   1   -0.18    0.22
   5 -13  -1    0.19    0.24
  -5  13   1   -0.26    0.18
   5  13  -1    0.03    0.22
   5  13  -1    0.09    0.23
   4 -13  -1   -0.32    0.23
  -4 -13   1   -0.18    0.23
   4  13  -1    0.17    0.23
   4  13  -1    0.04    0.23
  -4  13   1   -0.30    0.17
  -3 -13   1    0.47    0.25
   3 -13  -1    0.25    0.25
  -3  13   1   -0.21    0.17
   3  13  -1   -0.18    0.18
   3  13  -1   -0.14    0.21
  -2 -13   1    0.82    0.26
   2 -13  -1    0.86    0.28
   2  13  -1    1.23    0.26
  -2  13   1    1.38    0.26
   2  13  -1    1.35    0.26
  -1 -13   1    0.82    0.29
   1 -13  -1    1.07    0.29
  -1  13   1    0.59    0.23
   1  13  -1    0.68    0.24
   1  13  -1    0.92    0.27
   0 -13  -1    0.31    0.24
   0 -13   1    0.33    0.24
   0  13  -1   -0.16    0.19
   0  13   1    0.27    0.24
   0  13   1    0.08    0.19
   1 -13   1    0.79    0.28
  -1 -13  -1    0.13    0.24
   1  13   1    0.33    0.21
   1  13   1   -0.05    0.20
  -1  13  -1    0.37    0.20
   2 -13   1    0.21    0.25
  -2 -13  -1    0.10    0.23
  -2  13  -1    0.01    0.20
   2  13   1    0.18    0.20
   2  13   1    0.14    0.19
  -3 -13  -1    1.21    0.29
   3 -13   1    1.19    0.28
   3  13   1    0.61    0.26
  -3  13  -1    0.45    0.22
   3  13   1    1.64    0.29
   4 -13   1   -0.37    0.23
  -4 -13  -1    0.17    0.24
  -4  13  -1    0.01    0.18
   4  13   1    0.14    0.23
   4  13   1   -0.08    0.21
   5 -13   1    0.05    0.23
   5  13   1   -0.07    0.22
  -5  13  -1    0.21    0.19
   5  13   1    0.12    0.25
   6 -13   1   -0.30    0.23
   6  13   1    0.18    0.23
   6  13   1   -0.12    0.25
  -6  13  -1   -0.23    0.17
   7 -13   1    0.62    0.28
   7  13   1    0.40    0.25
   7  13   1    0.34    0.23
   8 -13   1    0.66    0.26
   8  13   1   -0.02    0.25
   9 -13   1    0.01    0.25
   9  13   1    0.43    0.27
   5 -14  -1   -0.10    0.25
  -5 -14   1   -0.08    0.23
  -5  14   1    0.08    0.21
   5  14  -1   -0.08    0.24
  -4 -14   1    0.00    0.25
   4 -14  -1   -0.06    0.26
   4  14  -1    0.12    0.25
  -4  14   1   -0.13    0.19
  -3 -14   1    0.04    0.25
   3 -14  -1    0.18    0.26
  -3  14   1   -0.14    0.21
   3  14  -1    0.28    0.24
  -2 -14   1   -0.13    0.26
   2 -14  -1   -0.25    0.22
   2  14  -1   -0.06    0.23
  -2  14   1   -0.15    0.21
  -1 -14   1    4.27    0.45
   1 -14  -1    3.07    0.42
  -1  14   1    2.67    0.35
   1  14  -1    3.19    0.38
   0 -14  -1    0.50    0.28
   0 -14   1    0.10    0.26
   0  14  -1    0.23    0.23
   0  14   1   -0.29    0.20
  -1 -14  -1    0.60    0.28
   1 -14   1    1.49    0.32
   1  14   1    0.67    0.25
  -1  14  -1    0.76    0.27
   1  14   1    0.85    0.25
   2 -14   1    0.76    0.27
  -2 -14  -1    1.01    0.30
  -2  14  -1    0.05    0.20
   2  14   1    0.72    0.25
   2  14   1    0.99    0.29
  -3 -14  -1    0.64    0.26
   3 -14   1    0.65    0.28
   3  14   1    0.76    0.28
  -3  14  -1    0.00    0.21
   4 -14   1    0.87    0.31
  -4  14  -1    0.67    0.25
   4  14   1    0.83    0.29
   5 -14   1   -0.29    0.25
   5  14   1    0.25    0.26
  -5  14  -1    0.00    0.20
  21   0  -2    0.05    0.21
  20   0  -2    0.01    0.19
  19   0  -2    0.23    0.18
  18   0  -2   -0.04    0.16
  17   0  -2    0.04    0.16
  16   0  -2    0.43    0.16
  15   0  -2    0.13    0.15
  14   0  -2   19.61    0.59
 -13   0   2   -0.05    0.10
  13   0  -2    0.09    0.12
  12   0  -2   11.53    0.39
  12   0  -2   11.21    0.24
 -12   0   2   11.51    0.37
  11   0  -2   -0.01    0.03
 -11   0   2   -0.05    0.08
  11   0  -2    0.12    0.10
 -11   0   2    0.02    0.07
 -10   0   2    8.77    0.30
  10   0  -2    9.16    0.21
  10   0  -2    9.48    0.32
 -10   0   2    9.16    0.30
   9   0  -2    0.04    0.07
   9   0  -2    0.04    0.03
  -9   0   2   -0.05    0.07
  -9   0   2    0.08    0.06
  -8   0   2   35.00    0.77
   8   0  -2   34.59    0.78
  -8   0   2   35.30    0.76
   8   0  -2   35.38    0.68
   7   0  -2   -0.05    0.03
  -7   0   2    0.05    0.07
   7   0  -2    0.08    0.07
  -7   0   2    0.01    0.06
   6   0  -2  118.91    2.28
   6   0  -2  117.80    2.20
  -6   0   2  113.69    2.26
  -6   0   2  117.33    2.27
   5   0  -2   -0.05    0.05
  -5   0   2    0.10    0.04
  -5   0   2    0.00    0.05
  -4   0   2  953.45   17.69
  -4   0   2  976.48   17.66
   4   0  -2  859.57   17.64
   3   0  -2   -0.11    0.05
  -3   0   2   -0.04    0.05
   3   0  -2    0.00    0.04
  -2   0   2   74.36    1.44
  -2   0   2   77.38    1.46
   2   0  -2   73.71    1.42
   2   0  -2   74.56    1.44
  -1   0   2    0.01    0.02
  -1   0   2   -0.02    0.02
  -1   0   2   -0.03    0.02
   1   0  -2   -0.02    0.02
   1   0  -2   -0.02    0.02
   1   0  -2   -0.02    0.02
   0   0   2  130.39    2.39
   0   0  -2  122.90    2.39
  -1   0  -2   -0.02    0.03
   1   0   2    0.02    0.03
  -1   0  -2    0.01    0.03
   1   0   2    0.01    0.03
   2   0   2    4.82    0.14
   2   0   2    4.63    0.10
  -2   0  -2    4.60    0.14
   2   0   2    4.55    0.10
  -2   0  -2    4.55    0.13
   3   0   2   -0.10    0.05
   3   0   2   -0.04    0.03
   3   0   2   -0.02    0.03
  -3   0  -2    0.00    0.03
   3   0   2   -0.08    0.04
  -3   0  -2    0.04    0.05
  -3   0  -2   -0.07    0.04
   4   0   2    1.73    0.09
  -4   0  -2    1.75    0.07
  -4   0  -2    1.73    0.09
   4   0   2    1.61    0.08
  -4   0  -2    1.74    0.10
   5   0   2   -0.03    0.04
   5   0   2   -0.03    0.01
  -5   0  -2   -0.03    0.03
  -5   0  -2   -0.01    0.04
   5   0   2    0.00    0.04
  -5   0  -2   -0.05    0.03
   6   0   2   68.92    1.37
  -6   0  -2   69.32    1.37
  -6   0  -2   70.91    1.36
   6   0   2   70.43    1.38
  -6   0  -2   70.89    1.36
   7   0   2   -0.03    0.05
   7   0   2    0.00    0.05
  -7   0  -2   -0.01    0.05
  -7   0  -2    0.00    0.05
  -7   0  -2    0.01    0.05
   7   0   2   -0.07    0.06
  -8   0  -2   11.99    0.30
  -8   0  -2   12.21    0.30
   8   0   2   11.70    0.29
   8   0   2   11.83    0.32
  -8   0  -2   11.76    0.30
   8   0   2   11.66    0.32
  -9   0  -2    0.09    0.06
  -9   0  -2   -0.01    0.05
   9   0   2    0.00    0.07
   9   0   2    0.05    0.06
   9   0   2    0.06    0.05
  -9   0  -2    0.01    0.05
 -10   0  -2    2.34    0.13
 -10   0  -2    2.47    0.15
 -10   0  -2    2.19    0.13
  10   0   2    2.24    0.16
  10   0   2    2.22    0.12
  10   0   2    2.44    0.15
 -11   0  -2   -0.03    0.07
  11   0   2    0.01    0.09
 -11   0  -2    0.02    0.06
  11   0   2   -0.03    0.06
 -11   0  -2   -0.01    0.06
 -12   0  -2   35.08    0.80
  12   0   2   35.52    0.83
  12   0   2   35.28    0.75
  13   0   2    0.18    0.07
 -13   0  -2    0.25    0.11
  13   0   2    0.28    0.12
 -14   0  -2    2.61    0.21
  14   0   2    2.84    0.24
 -15   0  -2    0.15    0.12
  15   0   2    0.00    0.13
  16   0   2    2.27    0.23
  17   0   2   -0.04    0.14
  18   0   2    0.74    0.20
  19   0   2   -0.10    0.17
  20   0   2    0.96    0.23
  21  -1  -2    0.60    0.23
  21   1  -2    0.40    0.23
  20  -1  -2   -0.11    0.18
  20   1  -2    0.14    0.19
  19  -1  -2    1.74    0.26
  19   1  -2    2.21    0.28
  18  -1  -2    0.12    0.17
  18   1  -2   -0.06    0.17
  17  -1  -2    0.15    0.16
  17   1  -2    0.02    0.15
  16  -1  -2   -0.03    0.14
  16   1  -2    0.01    0.14
 -15  -1   2    1.29    0.17
  15  -1  -2    1.21    0.19
  15   1  -2    1.50    0.20
  14  -1  -2    1.98    0.21
 -14  -1   2    1.72    0.17
  14   1  -2    1.71    0.21
 -13  -1   2    9.18    0.34
 -13  -1   2    8.77    0.34
  13  -1  -2    8.90    0.36
 -13   1   2    7.89    0.31
  13   1  -2    8.78    0.24
  13   1  -2   10.08    0.38
 -12  -1   2    2.46    0.19
  12  -1  -2    2.55    0.21
 -12  -1   2    2.25    0.19
  12   1  -2    2.52    0.12
  12   1  -2    2.08    0.20
 -12   1   2    2.56    0.18
  11  -1  -2    9.22    0.34
 -11  -1   2    9.22    0.31
 -11  -1   2    8.92    0.31
  11   1  -2    8.94    0.24
 -11   1   2    8.87    0.31
  11   1  -2    9.15    0.34
 -10  -1   2   11.11    0.34
 -10  -1   2   10.85    0.34
  10  -1  -2   11.12    0.36
 -10   1   2   11.07    0.34
  10   1  -2   11.18    0.28
  10   1  -2   11.17    0.36
  -9  -1   2    6.29    0.23
   9  -1  -2    5.62    0.24
  -9  -1   2    5.77    0.22
  -9   1   2    6.15    0.23
   9   1  -2    6.34    0.25
   9   1  -2    6.07    0.18
  -8  -1   2   73.80    1.50
   8  -1  -2   73.64    1.51
  -8  -1   2   76.58    1.49
   8   1  -2   74.29    1.51
   8   1  -2   72.58    1.44
  -8   1   2   73.92    1.50
  -7  -1   2    0.00    0.06
  -7  -1   2    0.08    0.07
   7  -1  -2   -0.04    0.07
   7   1  -2    0.02    0.07
  -7   1   2   -0.02    0.07
   7   1  -2    0.08    0.05
  -6  -1   2    4.14    0.16
  -6  -1   2    3.96    0.17
   6  -1  -2    3.83    0.16
   6   1  -2    4.16    0.17
  -6   1   2    4.11    0.16
  -5  -1   2    0.06    0.04
  -5  -1   2    0.08    0.05
   5  -1  -2    0.05    0.06
   5   1  -2    0.00    0.06
  -5   1   2    0.03    0.05
  -4  -1   2   61.36    1.20
  -4  -1   2   60.19    1.19
   4  -1  -2   59.42    1.20
  -4   1   2   61.59    1.20
   4   1  -2   60.10    1.20
  -4   1   2   61.21    1.14
   3  -1  -2   41.07    0.79
  -3  -1   2   41.95    0.83
  -3  -1   2   40.81    0.82
   3  -1  -2   40.98    0.83
  -3   1   2   42.14    0.83
   3   1  -2   40.63    0.83
   3   1  -2   42.06    0.82
  -3   1   2   41.17    0.79
  -2  -1   2    0.12    0.04
   2  -1  -2    0.10    0.03
   2  -1  -2    0.11    0.05
   2   1  -2    0.14    0.05
  -2   1   2    0.12    0.03
   2   1  -2    0.07    0.04
   1  -1  -2   42.73    0.82
   1  -1  -2   42.63    0.82
  -1  -1   2   42.00    0.82
  -1  -1   2   41.77    0.82
  -1   1   2   42.44    0.82
   1   1  -2   42.25    0.82
   1   1  -2   42.55    0.82
  -1   1   2   40.84    0.82
   0  -1   2  124.13    2.32
   0  -1  -2  121.33    2.32
   0  -1   2  120.26    2.33
   0  -1  -2  122.77    2.33
   0   1  -2  123.16    2.31
   0   1  -2  122.46    2.33
   0   1   2  124.52    2.32
   0   1   2  123.17    2.33
   0   1  -2  124.03    2.32
   0   1   2  124.40    2.32
  -1  -1  -2  334.55    6.31
   1  -1   2  306.72    6.19
  -1  -1  -2  333.57    6.21
   1  -1   2  339.62    6.22
  -1   1  -2  337.82    6.28
   1   1   2  326.10    6.25
   1   1   2  326.96    6.24
  -2  -1  -2   22.35    0.48
   2  -1   2   22.84    0.45
  -2  -1  -2   22.74    0.46
   2  -1   2   22.50    0.49
   2   1   2   22.93    0.46
  -2   1  -2   21.96    0.48
  -2   1  -2   21.92    0.47
   2   1   2   22.85    0.46
   2   1   2   23.73    0.48
  -2   1  -2   23.04    0.44
  -3  -1  -2    9.32    0.24
   3  -1   2    9.95    0.22
  -3  -1  -2    9.91    0.23
  -3  -1  -2   10.00    0.23
   3  -1   2    9.71    0.23
   3   1   2    9.82    0.23
   3   1   2    9.84    0.25
   3   1   2    9.98    0.23
  -3   1  -2    9.90    0.23
  -3   1  -2   10.12    0.28
  -3   1  -2    9.97    0.21
   4  -1   2   11.53    0.26
  -4  -1  -2   11.15    0.26
   4  -1   2   11.34    0.26
  -4  -1  -2   11.22    0.27
  -4  -1  -2   11.16    0.28
   4   1   2   11.58    0.27
  -4   1  -2   11.33    0.25
  -4   1  -2   12.08    0.26
   4   1   2   11.32    0.28
  -4   1  -2   11.52    0.24
  -5  -1  -2    3.38    0.13
  -5  -1  -2    3.08    0.12
   5  -1   2    3.42    0.12
   5  -1   2    3.28    0.13
  -5  -1  -2    3.35    0.13
  -5  -1  -2    3.46    0.12
  -5   1  -2    3.40    0.10
   5   1   2    3.49    0.13
  -5   1  -2    3.40    0.12
   5   1   2    3.43    0.14
  -5   1  -2    3.46    0.11
   5   1   2    3.35    0.13
  -6  -1  -2   20.01    0.45
  -6  -1  -2   19.87    0.44
  -6  -1  -2   20.17    0.44
   6  -1   2   20.25    0.43
   6  -1   2   20.36    0.45
   6   1   2   20.09    0.45
   6   1   2   20.31    0.46
  -6   1  -2   19.98    0.43
  -6   1  -2   19.78    0.43
  -6   1  -2   20.25    0.43
   6   1   2   20.01    0.45
  -7  -1  -2    9.19    0.26
  -7  -1  -2    9.22    0.25
   7  -1   2    9.61    0.26
  -7  -1  -2    9.35    0.25
   7  -1   2    9.13    0.26
   7  -1   2    9.48    0.24
  -7   1  -2    9.07    0.24
  -7   1  -2    9.40    0.24
   7   1   2    9.09    0.26
   7   1   2    9.60    0.27
   7   1   2    8.86    0.26
  -7   1  -2    9.63    0.24
   8  -1   2    2.20    0.11
   8  -1   2    2.09    0.13
  -8  -1  -2    2.22    0.13
  -8  -1  -2    1.93    0.12
   8  -1   2    2.20    0.13
  -8  -1  -2    2.09    0.12
   8   1   2    2.21    0.13
  -8   1  -2    2.24    0.12
   8   1   2    2.23    0.13
  -8   1  -2    2.10    0.11
  -8   1  -2    2.11    0.11
   8   1   2    2.28    0.14
  -9  -1  -2    0.12    0.06
   9  -1   2    0.00    0.06
   9  -1   2    0.14    0.05
   9  -1   2    0.12    0.07
  -9  -1  -2    0.07    0.06
   9   1   2   -0.03    0.06
  -9   1  -2    0.01    0.05
   9   1   2    0.10    0.07
  -9   1  -2    0.08    0.05
   9   1   2    0.02    0.07
  -9   1  -2    0.05    0.06
  10  -1   2    0.48    0.10
  10  -1   2    0.32    0.06
 -10  -1  -2    0.30    0.08
  10  -1   2    0.32    0.08
 -10  -1  -2    0.43    0.08
  10   1   2    0.30    0.08
 -10   1  -2    0.30    0.07
 -10   1  -2    0.35    0.07
 -10   1  -2    0.29    0.06
  10   1   2    0.35    0.10
 -11  -1  -2    4.41    0.21
  11  -1   2    4.54    0.23
 -11  -1  -2    4.48    0.20
 -11   1  -2    4.42    0.20
  11   1   2    4.54    0.23
  11   1   2    4.49    0.19
 -11   1  -2    4.07    0.16
 -12  -1  -2    0.23    0.10
  12  -1   2    0.41    0.12
  12   1   2    0.30    0.08
  12   1   2    0.37    0.12
 -13  -1  -2    0.82    0.14
  13  -1   2    0.75    0.14
  13   1   2    1.05    0.16
  13   1   2    0.62    0.10
 -14  -1  -2    4.49    0.26
  14  -1   2    4.46    0.26
  14   1   2    5.09    0.30
  14   1   2    4.22    0.27
 -15  -1  -2    3.55    0.25
  15  -1   2    3.59    0.27
  15   1   2    3.43    0.26
 -16  -1  -2    1.65    0.19
  16  -1   2    1.20    0.19
  16   1   2    1.56    0.21
  17  -1   2    2.28    0.24
 -17  -1  -2    1.71    0.21
  17   1   2    1.95    0.24
  18  -1   2    0.50    0.18
  18   1   2    0.01    0.16
  19  -1   2    3.49    0.31
  19   1   2    3.60    0.32
  20  -1   2    0.41    0.20
  20   1   2    0.53    0.20
  21  -2  -2    0.59    0.23
  21   2  -2    0.46    0.24
  20  -2  -2    0.80    0.23
  20   2  -2    0.72    0.23
  19  -2  -2    0.60    0.21
  19   2  -2    0.47    0.21
  18  -2  -2    1.01    0.22
  18   2  -2    0.74    0.21
  17  -2  -2    0.29    0.17
 -17  -2   2   -0.01    0.13
  17   2  -2    0.08    0.16
  16  -2  -2    0.80    0.18
 -16  -2   2    0.81    0.17
  16   2  -2    0.70    0.18
  15  -2  -2    0.00    0.13
 -15  -2   2   -0.13    0.11
  15   2  -2    0.14    0.15
 -14  -2   2    0.91    0.16
  14  -2  -2    0.81    0.17
  14   2  -2    0.74    0.17
  14   2  -2    0.77    0.10
 -13  -2   2    0.11    0.11
  13  -2  -2    0.03    0.12
 -13  -2   2    0.10    0.10
  13   2  -2   -0.02    0.12
 -13   2   2    0.11    0.10
  13   2  -2    0.06    0.07
  12  -2  -2    0.03    0.11
 -12  -2   2    0.02    0.09
 -12  -2   2   -0.05    0.09
  12   2  -2    0.09    0.07
  12   2  -2    0.02    0.11
 -12   2   2    0.01    0.09
 -11  -2   2    3.59    0.21
  11  -2  -2    3.40    0.22
 -11  -2   2    3.35    0.21
 -11   2   2    3.42    0.19
  11   2  -2    3.79    0.17
  11   2  -2    3.43    0.22
 -10  -2   2   15.71    0.43
  10  -2  -2   16.07    0.45
 -10  -2   2   15.71    0.44
  10   2  -2   15.63    0.39
  10   2  -2   15.27    0.45
 -10   2   2   15.55    0.43
  -9  -2   2    5.11    0.22
  -9  -2   2    4.95    0.21
   9  -2  -2    4.81    0.22
  -9   2   2    5.11    0.22
   9   2  -2    5.39    0.23
   9   2  -2    4.76    0.18
   8  -2  -2    3.83    0.19
  -8  -2   2    3.92    0.19
  -8  -2   2    3.79    0.18
  -8   2   2    4.39    0.19
   8   2  -2    3.88    0.20
   8   2  -2    3.65    0.16
   7  -2  -2   63.23    1.33
  -7  -2   2   64.76    1.32
  -7  -2   2   67.05    1.33
  -7   2   2   63.60    1.32
   7   2  -2   65.84    1.34
   7   2  -2   64.52    1.29
  -6  -2   2    6.55    0.23
  -6  -2   2    6.08    0.21
   6  -2  -2    6.19    0.22
   6   2  -2    6.30    0.23
  -6   2   2    6.33    0.14
  -6   2   2    6.67    0.22
   5  -2  -2    0.15    0.06
  -5  -2   2    0.20    0.06
  -5  -2   2    0.08    0.06
  -5   2   2    0.17    0.03
   5   2  -2    0.10    0.06
  -5   2   2    0.10    0.06
  -4  -2   2    2.56    0.13
   4  -2  -2    2.67    0.14
  -4  -2   2    2.59    0.12
   4   2  -2    2.29    0.13
  -4   2   2    2.48    0.09
  -4   2   2    2.87    0.14
   3  -2  -2   36.41    0.75
  -3  -2   2   36.84    0.75
  -3  -2   2   37.10    0.74
   3   2  -2   33.79    0.74
   3   2  -2   37.20    0.76
  -3   2   2   35.82    0.71
   2  -2  -2    9.57    0.23
   2  -2  -2    9.15    0.25
  -2  -2   2    9.35    0.25
  -2   2   2    9.18    0.23
   2   2  -2    9.30    0.25
   2   2  -2    9.59    0.24
  -1  -2   2  570.53   10.68
  -1  -2   2  539.34   10.66
   1  -2  -2  575.96   10.72
   1  -2  -2  561.90   10.74
  -1  -2   2  544.21   10.71
  -1   2   2  568.13   10.71
  -1   2   2  558.43   10.67
   1   2  -2  546.16   10.65
   1   2  -2  603.70   10.79
   0  -2  -2   30.63    0.63
   0  -2   2   29.37    0.62
   0  -2   2   30.05    0.62
   0  -2  -2   30.82    0.63
   0  -2   2   30.08    0.61
   0  -2   2   29.86    0.62
   0   2  -2   30.74    0.62
   0   2   2   30.33    0.63
   0   2  -2   30.76    0.62
   0   2  -2   30.81    0.61
   0   2   2   30.66    0.63
   1  -2   2  185.78    3.50
   1  -2   2  184.23    3.51
  -1  -2  -2  188.91    3.50
  -1  -2  -2  184.09    3.51
   1  -2   2  186.75    3.50
  -1   2  -2  188.08    3.51
   1   2   2  185.97    3.51
   1   2   2  181.73    3.51
  -1   2  -2  185.25    3.52
   1   2   2  178.52    3.50
  -1   2  -2  188.06    3.49
  -2  -2  -2   29.85    0.63
   2  -2   2   29.32    0.61
  -2  -2  -2   30.29    0.61
   2  -2   2   29.77    0.61
   2   2   2   29.90    0.62
   2   2   2   29.87    0.63
   2   2   2   29.26    0.62
  -3  -2  -2    1.11    0.09
   3  -2   2    0.92    0.07
  -3  -2  -2    0.90    0.08
   3   2   2    0.95    0.06
   3   2   2    1.09    0.09
   3   2   2    0.99    0.08
   3   2   2    0.97    0.09
  -4  -2  -2   11.20    0.28
   4  -2   2   10.88    0.27
  -4  -2  -2   11.08    0.25
  -4  -2  -2   11.23    0.29
  -4   2  -2   11.24    0.26
   4   2   2   11.05    0.28
   4   2   2   10.93    0.29
  -4   2  -2   11.10    0.26
   4   2   2   10.87    0.28
  -5  -2  -2   20.54    0.43
   5  -2   2   20.81    0.46
  -5  -2  -2   20.51    0.47
  -5  -2  -2   20.71    0.46
  -5   2  -2   20.54    0.44
   5   2   2   20.24    0.47
   5   2   2   19.96    0.46
  -5   2  -2   19.79    0.44
   5   2   2   20.29    0.47
  -6  -2  -2   58.08    1.15
   6  -2   2   57.88    1.17
  -6  -2  -2   58.23    1.17
  -6  -2  -2   58.78    1.17
   6   2   2   58.28    1.19
  -6   2  -2   58.59    1.15
   6   2   2   59.61    1.19
  -6   2  -2   58.05    1.15
   6   2   2   58.37    1.19
  -7  -2  -2   24.85    0.56
   7  -2   2   26.32    0.57
  -7  -2  -2   24.47    0.56
  -7   2  -2   25.69    0.55
  -7   2  -2   25.25    0.53
   7   2   2   25.35    0.58
   7   2   2   25.15    0.58
  -8  -2  -2    0.17    0.07
  -8  -2  -2    0.21    0.07
   8  -2   2    0.13    0.07
  -8   2  -2    0.10    0.05
   8   2   2    0.16    0.07
   8   2   2    0.30    0.08
  -8   2  -2    0.23    0.06
  -9  -2  -2    0.15    0.07
   9  -2   2    0.14    0.07
   9  -2   2    0.16    0.08
  -9  -2  -2    0.19    0.07
  -9   2  -2    0.22    0.07
   9   2   2    0.16    0.07
  -9   2  -2    0.11    0.05
   9   2   2    0.20    0.09
 -10  -2  -2    5.16    0.22
 -10  -2  -2    5.26    0.21
  10  -2   2    4.92    0.22
  10  -2   2    5.47    0.25
  10   2   2    5.07    0.24
 -10   2  -2    5.04    0.19
  10   2   2    5.77    0.22
 -10   2  -2    5.04    0.16
  11  -2   2    6.74    0.27
 -11  -2  -2    6.94    0.27
 -11  -2  -2    6.79    0.30
  11   2   2    6.54    0.28
 -11   2  -2    6.77    0.19
  11   2   2    6.53    0.25
 -12  -2  -2    0.45    0.11
  12  -2   2    0.40    0.12
  12   2   2    0.45    0.10
  12   2   2    0.46    0.13
  13  -2   2    2.45    0.21
 -13  -2  -2    2.04    0.18
  13   2   2    2.21    0.20
  13   2   2    2.22    0.17
 -14  -2  -2    1.93    0.19
  14  -2   2    1.85    0.20
  14   2   2    1.58    0.19
  14   2   2    1.76    0.16
  15  -2   2    5.38    0.29
 -15  -2  -2    4.88    0.29
  15   2   2    5.43    0.32
  16  -2   2    0.68    0.17
 -16  -2  -2    0.63    0.16
  16   2   2    1.15    0.19
 -17  -2  -2    0.01    0.13
  17  -2   2    0.06    0.15
  17   2   2   -0.04    0.15
  18  -2   2    0.89    0.20
 -18  -2  -2    0.62    0.17
  18   2   2    0.75    0.20
  19  -2   2    1.16    0.22
 -19  -2  -2    0.72    0.20
  19   2   2    0.97    0.22
  20  -2   2    1.78    0.27
  20   2   2    2.24    0.28
  21  -3  -2    2.82    0.33
  21   3  -2    2.66    0.33
  20  -3  -2    0.35    0.22
  20   3  -2    0.36    0.21
  19  -3  -2    1.42    0.25
  19   3  -2    1.31    0.25
 -18  -3   2    0.89    0.19
  18  -3  -2    0.57    0.21
  18   3  -2    1.13    0.24
 -17  -3   2    0.55    0.17
  17  -3  -2    0.65    0.19
  17   3  -2    0.33    0.17
  16  -3  -2    0.06    0.16
 -16  -3   2    0.08    0.14
  16   3  -2    0.08    0.16
  15  -3  -2    0.67    0.17
 -15  -3   2    0.88    0.16
  15   3  -2    1.10    0.20
  15   3  -2    0.96    0.19
  14  -3  -2    1.87    0.21
 -14  -3   2    1.47    0.18
  14   3  -2    1.54    0.21
  14   3  -2    1.46    0.14
 -13  -3   2   -0.10    0.10
 -13  -3   2    0.01    0.11
  13  -3  -2   -0.11    0.11
  13   3  -2   -0.09    0.12
  13   3  -2    0.13    0.09
 -12  -3   2    1.98    0.19
 -12  -3   2    2.11    0.19
  12  -3  -2    2.13    0.21
  12   3  -2    1.83    0.19
 -12   3   2    1.97    0.18
  12   3  -2    1.90    0.15
  11  -3  -2    8.92    0.34
 -11  -3   2    8.74    0.33
 -11  -3   2    8.85    0.32
  11   3  -2    9.08    0.35
 -11   3   2    8.21    0.31
  11   3  -2    8.66    0.29
 -10  -3   2    3.02    0.19
  10  -3  -2    2.94    0.21
 -10  -3   2    2.92    0.19
 -10   3   2    2.82    0.18
  10   3  -2    2.94    0.20
  10   3  -2    3.01    0.17
  -9  -3   2   18.28    0.48
  -9  -3   2   18.11    0.49
   9  -3  -2   18.03    0.49
   9   3  -2   17.89    0.45
   9   3  -2   17.40    0.49
  -9   3   2   18.17    0.47
  -8  -3   2   13.78    0.38
   8  -3  -2   14.13    0.40
  -8  -3   2   13.57    0.39
   8   3  -2   13.49    0.37
  -8   3   2   13.48    0.38
  -8   3   2   13.58    0.28
   8   3  -2   13.28    0.40
  -8   3   2   13.95    0.28
   7  -3  -2    0.65    0.11
  -7  -3   2    0.83    0.10
  -7  -3   2    0.64    0.10
   7   3  -2    0.83    0.12
  -7   3   2    0.85    0.11
  -7   3   2    0.77    0.06
   6  -3  -2    0.19    0.09
  -6  -3   2    0.14    0.08
  -6  -3   2    0.31    0.08
   6   3  -2    0.21    0.09
  -6   3   2    0.09    0.05
  -6   3   2    0.26    0.09
  -5  -3   2   81.25    1.58
  -5  -3   2   79.22    1.59
   5  -3  -2   78.23    1.59
  -5   3   2   80.24    1.53
   5   3  -2   77.48    1.59
  -4  -3   2    4.79    0.19
  -4  -3   2    4.66    0.18
   4  -3  -2    4.92    0.20
   4   3  -2    5.08    0.19
  -4   3   2    4.87    0.15
   3  -3  -2  193.94    3.74
  -3  -3   2  196.09    3.73
  -3  -3   2  196.58    3.75
  -3  -3   2  198.82    3.68
  -3   3   2  195.67    3.71
   3   3  -2  194.48    3.74
  -2  -3   2    0.09    0.06
  -2  -3   2   -0.02    0.03
  -2  -3   2    0.05    0.04
   2  -3  -2    0.09    0.06
   2   3  -2   -0.01    0.06
   2   3  -2    0.02    0.05
  -2   3   2    0.06    0.05
  -1  -3   2   73.14    1.42
   1  -3  -2   74.72    1.46
  -1  -3   2   73.01    1.44
  -1  -3   2   73.11    1.46
  -1   3   2   74.62    1.46
   1   3  -2   74.01    1.46
   1   3  -2   74.36    1.42
  -1   3   2   72.88    1.45
   0  -3  -2  119.97    2.31
   0  -3   2  119.53    2.29
   0  -3   2  117.22    2.30
   0  -3   2  121.19    2.29
   0   3   2  119.66    2.31
   0   3  -2  119.24    2.30
   0   3  -2  119.28    2.28
   0   3   2  118.98    2.31
   1  -3   2   28.94    0.61
  -1  -3  -2   28.44    0.61
   1   3   2   27.67    0.62
  -1   3  -2   28.94    0.61
   1   3   2   28.14    0.62
  -2  -3  -2   33.11    0.70
   2  -3   2   33.48    0.69
   2   3   2   32.44    0.71
   2   3   2   32.61    0.70
   3  -3   2    1.40    0.11
   3  -3   2    1.29    0.11
  -3  -3  -2    1.29    0.11
   3   3   2    1.02    0.11
   3   3   2    0.98    0.09
   3   3   2    1.16    0.05
   4  -3   2    0.39    0.08
  -4  -3  -2    0.47    0.08
   4   3   2    0.43    0.09
   4   3   2    0.27    0.08
  -5  -3  -2    9.33    0.28
   5  -3   2   10.04    0.28
  -5   3  -2   10.05    0.27
   5   3   2    9.79    0.29
   5   3   2   10.35    0.30
  -6  -3  -2    4.73    0.19
  -6  -3  -2    4.50    0.14
   6  -3   2    4.89    0.19
  -6  -3  -2    4.63    0.18
   6   3   2    4.48    0.20
  -6   3  -2    4.49    0.16
  -6   3  -2    4.53    0.17
   6   3   2    4.22    0.19
  -7  -3  -2    1.07    0.10
  -7  -3  -2    1.24    0.11
  -7  -3  -2    1.06    0.09
   7  -3   2    0.94    0.11
   7   3   2    1.13    0.12
  -7   3  -2    1.25    0.10
  -7   3  -2    1.17    0.09
   7   3   2    1.13    0.12
  -8  -3  -2    1.60    0.14
   8  -3   2    1.99    0.15
  -8  -3  -2    1.95    0.14
  -8   3  -2    1.74    0.10
  -8   3  -2    1.90    0.12
   8   3   2    2.24    0.17
   8   3   2    1.79    0.15
   9  -3   2    3.93    0.20
  -9  -3  -2    3.94    0.19
  -9  -3  -2    4.22    0.20
  -9   3  -2    3.87    0.14
   9   3   2    3.74    0.20
  -9   3  -2    3.83    0.17
   9   3   2    4.01    0.21
 -10  -3  -2    0.04    0.08
  10  -3   2    0.26    0.10
 -10  -3  -2    0.23    0.09
 -10   3  -2    0.20    0.06
  10   3   2    0.32    0.10
  10   3   2    0.16    0.11
 -10   3  -2    0.11    0.07
 -11  -3  -2    0.35    0.11
  11  -3   2    0.27    0.11
  11   3   2    0.38    0.11
  11   3   2    0.13    0.11
  12  -3   2   14.39    0.45
 -12  -3  -2   14.09    0.44
  12   3   2   14.41    0.46
  12   3   2   14.38    0.43
 -13  -3  -2   14.75    0.47
  13  -3   2   14.99    0.47
  13   3   2   14.71    0.45
  13   3   2   15.86    0.49
  14  -3   2    1.31    0.18
 -14  -3  -2    1.27    0.17
  14   3   2    1.56    0.20
  14   3   2    1.21    0.15
  15  -3   2    0.98    0.18
 -15  -3  -2    0.92    0.16
  15   3   2    0.76    0.18
  16  -3   2    2.16    0.24
 -16  -3  -2    1.99    0.22
  16   3   2    2.07    0.24
  17  -3   2    1.71    0.23
 -17  -3  -2    0.96    0.18
  17   3   2    1.16    0.21
 -18  -3  -2    1.26    0.21
  18  -3   2    0.79    0.20
  18   3   2    0.85    0.22
  19  -3   2    1.64    0.25
 -19  -3  -2    2.24    0.26
  19   3   2    2.08    0.28
  20  -3   2    0.35    0.20
 -20  -3  -2    0.08    0.17
  20   3   2    0.11    0.20
  21  -4  -2   -0.02    0.21
  21   4  -2   -0.26    0.21
  20  -4  -2    0.31    0.22
  20   4  -2    0.37    0.23
  19  -4  -2    0.53    0.22
  19   4  -2    0.40    0.22
  18  -4  -2    1.00    0.23
  18   4  -2    0.66    0.23
  17  -4  -2   -0.23    0.15
 -17  -4   2   -0.27    0.12
  17   4  -2    0.20    0.17
 -16  -4   2   -0.04    0.12
  16  -4  -2    0.20    0.17
  16   4  -2    0.17    0.17
 -15  -4   2    0.16    0.14
  15  -4  -2    0.12    0.15
  15   4  -2    0.17    0.16
  15   4  -2    0.25    0.11
 -14  -4   2    3.11    0.26
  14  -4  -2    2.34    0.23
  14   4  -2    2.64    0.26
  14   4  -2    2.43    0.19
 -13  -4   2    1.46    0.19
  13  -4  -2    1.43    0.19
 -13  -4   2    1.53    0.18
  13   4  -2    2.46    0.24
  13   4  -2    1.97    0.17
 -12  -4   2    9.64    0.37
 -12  -4   2    9.44    0.37
  12  -4  -2    9.78    0.38
 -12   4   2    9.16    0.35
  12   4  -2    9.73    0.40
  12   4  -2    9.15    0.33
  11  -4  -2   16.48    0.50
 -11  -4   2   16.05    0.48
 -11  -4   2   15.72    0.48
  11   4  -2   15.41    0.45
 -11   4   2   15.63    0.46
  11   4  -2   15.39    0.50
 -10  -4   2    0.63    0.11
 -10  -4   2    0.98    0.15
  10  -4  -2    0.78    0.14
  10   4  -2    0.89    0.15
  10   4  -2    0.78    0.12
 -10   4   2    1.00    0.13
   9  -4  -2    0.22    0.10
  -9  -4   2    0.16    0.09
  -9  -4   2    0.24    0.10
  -9   4   2    0.19    0.05
   9   4  -2    0.13    0.09
  -9   4   2    0.16    0.09
   9   4  -2    0.14    0.11
  -8  -4   2    4.78    0.22
  -8  -4   2    4.50    0.22
   8  -4  -2    4.63    0.24
   8   4  -2    4.70    0.21
   8   4  -2    4.04    0.23
  -8   4   2    4.62    0.22
  -8   4   2    4.69    0.15
  -7  -4   2    0.15    0.09
   7  -4  -2    0.12    0.10
  -7  -4   2    0.17    0.08
   7   4  -2    0.09    0.09
  -7   4   2    0.21    0.09
  -7   4   2    0.14    0.05
   6  -4  -2    5.92    0.24
  -6  -4   2    5.44    0.24
  -6  -4   2    5.85    0.23
  -6   4   2    5.66    0.18
   6   4  -2    5.81    0.24
  -5  -4   2   43.75    0.94
   5  -4  -2   43.84    0.95
  -5  -4   2   43.43    0.96
   5   4  -2   44.82    0.97
  -5   4   2   44.02    0.90
  -4  -4   2    0.02    0.03
  -4  -4   2    0.07    0.08
  -4  -4   2    0.02    0.07
   4  -4  -2   -0.06    0.08
   4   4  -2    0.03    0.09
  -4   4   2   -0.02    0.06
  -3  -4   2   12.64    0.36
  -3  -4   2   12.47    0.28
  -3  -4   2   12.17    0.33
   3  -4  -2   12.06    0.35
   3   4  -2   13.04    0.35
  -3   4   2   12.91    0.33
  -2  -4   2   61.62    1.20
  -2  -4   2   61.26    1.26
   2  -4  -2   62.77    1.26
  -2   4   2   60.27    1.24
  -2   4   2   60.70    1.26
   2   4  -2   61.65    1.26
  -1  -4   2   89.47    1.73
   1  -4  -2   87.11    1.75
  -1  -4   2   88.16    1.75
   1   4  -2   88.78    1.71
   1   4  -2   88.83    1.75
  -1   4   2   87.05    1.74
  -1   4   2   87.61    1.75
   0  -4  -2   -0.03    0.07
   0  -4   2   -0.01    0.07
   0  -4   2    0.04    0.06
   0   4   2   -0.01    0.08
   0   4  -2    0.12    0.08
   0   4   2    0.07    0.07
  -1  -4  -2    2.13    0.15
   1  -4   2    1.94    0.15
   1   4   2    2.15    0.16
  -1   4  -2    2.36    0.15
   1   4   2    2.45    0.16
  -2  -4  -2   36.52    0.80
   2  -4   2   37.67    0.80
  -2   4  -2   35.38    0.78
   2   4   2   36.33    0.80
   2   4   2   37.68    0.81
  -3  -4  -2   39.17    0.85
   3  -4   2   39.53    0.84
   3   4   2   39.51    0.86
   3   4   2   38.73    0.85
  -4  -4  -2   22.27    0.55
   4  -4   2   24.42    0.55
   4   4   2   23.68    0.57
   4   4   2   23.03    0.56
   5  -4   2  107.80    2.11
  -5  -4  -2  105.63    2.11
   5   4   2  105.50    2.12
   5   4   2  107.49    2.13
   6  -4   2   41.61    0.89
  -6  -4  -2   41.33    0.89
  -6  -4  -2   40.53    0.89
  -6   4  -2   41.44    0.87
   6   4   2   40.11    0.91
   6   4   2   40.98    0.91
  -7  -4  -2    0.23    0.09
   7  -4   2    0.03    0.09
  -7  -4  -2    0.11    0.07
  -7   4  -2    0.08    0.06
   7   4   2    0.21    0.08
  -7   4  -2    0.17    0.07
   7   4   2    0.23    0.10
  -8  -4  -2    2.37    0.17
  -8  -4  -2    2.27    0.17
   8  -4   2    2.78    0.19
  -8   4  -2    2.70    0.14
  -8   4  -2    2.59    0.15
   8   4   2    2.68    0.19
   8   4   2    2.73    0.20
  -9  -4  -2    0.26    0.10
  -9  -4  -2    0.38    0.10
   9  -4   2    0.30    0.11
  -9   4  -2    0.41    0.07
   9   4   2    0.24    0.11
  -9   4  -2    0.38    0.08
   9   4   2    0.52    0.12
 -10  -4  -2   13.78    0.41
  10  -4   2   13.77    0.42
 -10  -4  -2   13.62    0.41
  10   4   2   12.96    0.42
  10   4   2   13.82    0.44
 -10   4  -2   13.56    0.34
 -11  -4  -2   17.43    0.50
  11  -4   2   17.13    0.50
  11   4   2   17.26    0.52
  11   4   2   17.77    0.51
 -12  -4  -2    0.45    0.13
  12  -4   2    0.34    0.13
  12   4   2    0.75    0.16
  12   4   2    0.62    0.13
  13  -4   2    3.82    0.27
 -13  -4  -2    3.86    0.26
  13   4   2    3.24    0.23
  13   4   2    3.68    0.29
  14  -4   2    0.13    0.13
 -14  -4  -2    0.25    0.13
  14   4   2    0.18    0.12
  14   4   2    0.25    0.15
  15  -4   2    1.41    0.20
 -15  -4  -2    1.18    0.18
  15   4   2    1.11    0.16
  15   4   2    0.94    0.19
  16  -4   2   -0.06    0.14
 -16  -4  -2   -0.02    0.12
  16   4   2    0.00    0.15
  17  -4   2   -0.06    0.16
 -17  -4  -2    0.10    0.15
  17   4   2    0.19    0.16
  18  -4   2    0.51    0.20
 -18  -4  -2    0.43    0.17
  18   4   2    0.87    0.23
  19  -4   2    0.28    0.19
 -19  -4  -2    0.46    0.18
  19   4   2    0.43    0.21
  20  -5  -2   -0.03    0.23
  20   5  -2    0.22    0.23
  19  -5  -2    0.15    0.22
  19   5  -2   -0.09    0.20
  18  -5  -2    0.19    0.20
  18   5  -2    0.02    0.19
  17  -5  -2    1.07    0.23
  17   5  -2    1.22    0.24
 -16  -5   2    2.65    0.34
  16  -5  -2    3.13    0.29
  16   5  -2    2.52    0.29
  15  -5  -2    2.92    0.27
 -15  -5   2    2.98    0.26
  15   5  -2    2.93    0.28
  15   5  -2    2.88    0.24
  14  -5  -2    1.19    0.20
 -14  -5   2    1.13    0.16
  14   5  -2    1.10    0.16
  14   5  -2    1.17    0.22
  13  -5  -2    1.65    0.21
 -13  -5   2    1.86    0.20
  13   5  -2    1.89    0.19
  13   5  -2    1.67    0.22
 -12  -5   2    0.15    0.13
 -12  -5   2    0.00    0.12
  12  -5  -2   -0.09    0.13
  12   5  -2    0.04    0.11
  12   5  -2    0.11    0.14
 -11  -5   2    2.52    0.22
  11  -5  -2    2.36    0.22
 -11  -5   2    2.31    0.22
  11   5  -2    2.37    0.20
  11   5  -2    2.49    0.24
 -11   5   2    2.31    0.10
 -11   5   2    2.95    0.21
 -10  -5   2    4.13    0.25
 -10  -5   2    4.36    0.25
  10  -5  -2    3.84    0.26
 -10   5   2    4.31    0.24
 -10   5   2    3.97    0.15
  10   5  -2    4.26    0.24
  10   5  -2    4.38    0.26
   9  -5  -2    1.94    0.19
  -9  -5   2    1.77    0.18
  -9  -5   2    1.26    0.14
  -9   5   2    1.65    0.16
  -9   5   2    1.47    0.11
   9   5  -2    1.67    0.18
   9   5  -2    1.43    0.16
  -8  -5   2   18.97    0.52
  -8  -5   2   18.83    0.53
   8  -5  -2   19.58    0.54
  -8   5   2   18.44    0.51
  -8   5   2   19.10    0.44
   8   5  -2   19.37    0.55
   8   5  -2   18.68    0.51
  -7  -5   2   12.39    0.38
   7  -5  -2   12.44    0.40
  -7  -5   2   12.55    0.39
  -7   5   2   13.24    0.34
   7   5  -2   13.34    0.42
   6  -5  -2    0.55    0.11
  -6  -5   2    0.60    0.11
  -6  -5   2    0.49    0.10
  -6   5   2    0.61    0.09
   6   5  -2    0.66    0.12
  -5  -5   2    2.46    0.17
  -5  -5   2    2.13    0.18
   5  -5  -2    2.34    0.17
  -5   5   2    2.66    0.15
   5   5  -2    2.63    0.20
   4  -5  -2    0.00    0.09
  -4  -5   2    0.02    0.07
  -4  -5   2    0.02    0.09
   4   5  -2    0.05    0.08
  -4   5   2    0.03    0.08
  -3  -5   2    0.33    0.10
  -3  -5   2    0.45    0.09
   3  -5  -2    0.54    0.12
  -3   5   2    0.35    0.09
   3   5  -2    0.33    0.11
  -2  -5   2   -0.03    0.02
  -2  -5   2    0.06    0.08
   2  -5  -2    0.06    0.09
   2   5  -2    0.04    0.05
  -2   5   2   -0.08    0.09
  -2   5   2    0.22    0.08
   2   5  -2    0.03    0.08
   1  -5  -2   21.93    0.55
  -1  -5   2   21.20    0.51
  -1  -5   2   21.82    0.54
   1   5  -2   21.67    0.54
  -1   5   2   21.69    0.53
  -1   5   2   22.23    0.55
   0  -5   2    6.58    0.25
   0  -5  -2    6.81    0.26
   0   5   2    6.59    0.26
   0   5  -2    6.49    0.25
   0   5   2    6.81    0.25
   1  -5   2   16.89    0.45
  -1  -5  -2   17.30    0.46
   1   5   2   16.47    0.45
   1   5   2   17.42    0.46
  -1   5  -2   16.80    0.44
  -2  -5  -2    1.28    0.14
   2  -5   2    1.10    0.12
  -2   5  -2    1.26    0.13
   2   5   2    1.19    0.14
   2   5   2    1.06    0.13
   3  -5   2   14.60    0.40
  -3  -5  -2   14.58    0.41
   3   5   2   14.28    0.42
   3   5   2   14.04    0.41
  -4  -5  -2    0.45    0.10
   4  -5   2    0.70    0.11
   4   5   2    0.40    0.11
   4   5   2    0.57    0.12
   5  -5   2    0.22    0.10
  -5  -5  -2    0.10    0.08
   5   5   2    0.16    0.10
   5   5   2   -0.10    0.09
   6  -5   2    2.09    0.17
  -6  -5  -2    2.13    0.17
  -6  -5  -2    2.26    0.17
   6   5   2    1.98    0.17
   6   5   2    2.21    0.18
  -7  -5  -2    1.24    0.14
  -7  -5  -2    1.04    0.12
   7  -5   2    1.33    0.15
  -7   5  -2    1.52    0.13
   7   5   2    1.23    0.15
   7   5   2    1.33    0.15
   8  -5   2   -0.04    0.10
  -8  -5  -2    0.17    0.09
  -8  -5  -2   -0.03    0.09
  -8   5  -2    0.06    0.08
   8   5   2    0.13    0.11
   8   5   2   -0.07    0.10
  -9  -5  -2   -0.03    0.10
  -9  -5  -2   -0.09    0.09
   9  -5   2    0.07    0.11
   9   5   2   -0.11    0.10
   9   5   2    0.07    0.12
  -9   5  -2    0.08    0.08
  10  -5   2    9.17    0.35
 -10  -5  -2    9.54    0.35
 -10  -5  -2    9.05    0.35
  10   5   2    8.83    0.37
  10   5   2    8.81    0.35
 -11  -5  -2    1.44    0.17
  11  -5   2    0.95    0.16
  11   5   2    1.31    0.17
  11   5   2    1.31    0.19
 -12  -5  -2    0.60    0.13
  12  -5   2    0.59    0.16
  12   5   2    0.46    0.14
  12   5   2    0.74    0.17
  13  -5   2    0.11    0.13
 -13  -5  -2    0.13    0.12
  13   5   2   -0.20    0.13
  13   5   2   -0.14    0.11
  14  -5   2    0.53    0.16
 -14  -5  -2    0.80    0.16
  14   5   2    0.90    0.19
  14   5   2    0.66    0.16
 -15  -5  -2   -0.10    0.12
  15  -5   2    0.12    0.16
  15   5   2    0.04    0.15
  15   5   2    0.05    0.13
 -16  -5  -2    0.89    0.19
  16  -5   2    0.54    0.18
  16   5   2    1.01    0.22
 -17  -5  -2    0.08    0.16
  17  -5   2    0.14    0.18
  17   5   2    0.00    0.19
 -18  -5  -2    1.05    0.22
  18  -5   2    0.99    0.23
  18   5   2    1.22    0.25
  19  -5   2    0.36    0.21
  19   5   2    0.24    0.21
  19  -6  -2    0.35    0.23
  19   6  -2    0.45    0.25
  18  -6  -2    0.14    0.21
  18   6  -2    0.10    0.21
  17  -6  -2    0.06    0.19
  17   6  -2   -0.13    0.19
  16  -6  -2    1.28    0.24
  16   6  -2    1.36    0.26
  15  -6  -2    0.08    0.17
  15   6  -2    0.00    0.17
  15   6  -2   -0.04    0.13
  14  -6  -2    0.11    0.16
 -14  -6   2    0.03    0.17
  14   6  -2    0.17    0.17
  14   6  -2    0.05    0.12
 -13  -6   2    0.10    0.13
  13  -6  -2    0.32    0.16
  13   6  -2    0.03    0.12
  13   6  -2    0.17    0.17
 -12  -6   2   -0.12    0.12
 -12  -6   2    0.18    0.12
  12  -6  -2   -0.08    0.13
  12   6  -2    0.05    0.12
  12   6  -2   -0.05    0.14
  11  -6  -2    0.72    0.17
 -11  -6   2    0.95    0.16
 -11  -6   2    0.69    0.16
 -11   6   2    0.57    0.09
  11   6  -2    0.80    0.16
 -11   6   2    0.51    0.14
  11   6  -2    0.69    0.18
 -10  -6   2    0.02    0.13
 -10  -6   2   -0.07    0.10
  10  -6  -2    0.06    0.13
 -10   6   2   -0.25    0.07
  10   6  -2    0.13    0.14
 -10   6   2   -0.06    0.11
  10   6  -2    0.02    0.11
  -9  -6   2    5.37    0.28
  -9  -6   2    5.31    0.29
   9  -6  -2    5.77    0.31
   9   6  -2    5.39    0.28
  -9   6   2    5.13    0.21
  -9   6   2    5.31    0.27
   9   6  -2    4.71    0.30
  -8  -6   2    0.00    0.09
  -8  -6   2    0.27    0.12
   8  -6  -2    0.22    0.13
  -8   6   2    0.22    0.09
   8   6  -2    0.40    0.13
   8   6  -2    0.22    0.12
   7  -6  -2   20.34    0.59
  -7  -6   2   21.83    0.58
  -7  -6   2   21.99    0.60
  -7   6   2   21.89    0.52
   7   6  -2   20.88    0.58
   7   6  -2   21.10    0.60
   6  -6  -2   31.52    0.78
  -6  -6   2   31.38    0.78
  -6  -6   2   32.35    0.76
   6   6  -2   30.62    0.78
  -6   6   2   32.40    0.72
   5  -6  -2    0.84    0.14
  -5  -6   2    0.97    0.13
  -5  -6   2    0.99    0.15
   5   6  -2    1.00    0.15
  -5   6   2    0.94    0.12
   4  -6  -2    5.87    0.26
  -4  -6   2    5.93    0.25
  -4  -6   2    6.03    0.27
  -4   6   2    5.86    0.24
   4   6  -2    5.58    0.27
  -3  -6   2    6.26    0.25
  -3  -6   2    6.08    0.28
   3  -6  -2    6.37    0.27
  -3   6   2    6.28    0.25
   3   6  -2    6.12    0.27
  -2  -6   2    2.43    0.20
   2  -6  -2    2.34    0.18
   2   6  -2    2.76    0.20
  -2   6   2    2.49    0.20
  -2   6   2    2.19    0.18
   1  -6  -2    2.76    0.21
  -1  -6   2    2.86    0.19
  -1   6   2    2.61    0.17
  -1   6   2    2.95    0.21
   1   6  -2    2.95    0.20
   0  -6  -2    0.88    0.13
   0  -6   2    0.90    0.13
   0   6   2    0.99    0.15
   0   6  -2    0.95    0.13
   0   6   2    0.72    0.12
  -1  -6  -2    8.37    0.32
   1  -6   2    8.63    0.31
   1   6   2    7.97    0.32
  -1   6  -2    8.49    0.30
   1   6   2    8.81    0.32
  -2  -6  -2    3.92    0.23
   2  -6   2    3.78    0.22
  -2   6  -2    4.54    0.21
   2   6   2    4.28    0.23
   2   6   2    4.41    0.24
   2   6   2    3.89    0.13
  -3  -6  -2    0.10    0.10
   3  -6   2    0.03    0.09
   3   6   2    0.03    0.03
   3   6   2   -0.01    0.09
   3   6   2    0.01    0.09
  -4  -6  -2   17.65    0.50
   4  -6   2   17.99    0.50
   4   6   2   16.55    0.50
   4   6   2   17.38    0.51
   5  -6   2    0.97    0.13
  -5  -6  -2    0.99    0.14
   5   6   2    1.29    0.15
   5   6   2    1.23    0.16
  -6  -6  -2    1.81    0.17
   6  -6   2    2.04    0.18
  -6  -6  -2    2.31    0.19
   6   6   2    1.86    0.18
   6   6   2    2.04    0.19
   7  -6   2    0.63    0.14
  -7  -6  -2    0.54    0.13
  -7  -6  -2    0.43    0.11
   7   6   2    0.48    0.13
   7   6   2    0.38    0.13
  -8  -6  -2    0.35    0.11
  -8  -6  -2    0.17    0.12
   8  -6   2    0.32    0.13
  -8   6  -2    0.12    0.09
   8   6   2    0.27    0.13
   8   6   2    0.25    0.14
   9  -6   2    7.83    0.34
  -9  -6  -2    8.37    0.34
  -9  -6  -2    7.66    0.33
   9   6   2    7.66    0.36
   9   6   2    8.20    0.35
 -10  -6  -2    1.65    0.19
  10  -6   2    1.96    0.21
  10   6   2    1.81    0.21
  10   6   2    1.43    0.20
 -11  -6  -2    0.29    0.13
  11  -6   2    0.42    0.15
  11   6   2    0.39    0.16
  11   6   2    0.27    0.14
  12  -6   2   -0.02    0.14
 -12  -6  -2    0.04    0.11
  12   6   2    0.02    0.14
  12   6   2   -0.17    0.11
 -13  -6  -2    0.01    0.11
  13  -6   2   -0.13    0.14
  13   6   2    0.12    0.16
  13   6   2   -0.12    0.13
  14  -6   2   -0.09    0.15
 -14  -6  -2    0.16    0.14
  14   6   2   -0.09    0.15
  14   6   2    0.04    0.14
 -15  -6  -2    0.44    0.16
  15  -6   2    0.66    0.19
  15   6   2    0.71    0.18
  15   6   2    0.62    0.20
 -16  -6  -2    1.17    0.21
  16  -6   2    1.06    0.23
  16   6   2    1.37    0.25
  17  -6   2   -0.09    0.17
 -17  -6  -2   -0.12    0.25
  17   6   2    0.08    0.19
  18  -6   2    0.43    0.21
  18   6   2    0.49    0.22
  19  -7  -2    1.23    0.29
  19   7  -2    0.81    0.28
  18  -7  -2    2.05    0.31
  18   7  -2    2.32    0.33
  17  -7  -2    0.40    0.22
  17   7  -2    0.45    0.22
  16  -7  -2    1.35    0.25
  16   7  -2    0.96    0.19
  16   7  -2    0.99    0.25
  15  -7  -2    0.90    0.21
  15   7  -2    0.62    0.18
  15   7  -2    0.87    0.23
  14  -7  -2    0.98    0.21
  14   7  -2    0.71    0.21
  14   7  -2    0.94    0.18
  13  -7  -2    0.10    0.16
  13   7  -2    0.07    0.13
  13   7  -2    0.08    0.16
 -12  -7   2    1.55    0.25
  12  -7  -2    1.10    0.20
  12   7  -2    0.88    0.17
  12   7  -2    1.37    0.22
 -11  -7   2   -0.04    0.14
  11  -7  -2   -0.16    0.13
 -11  -7   2    0.02    0.19
  11   7  -2    0.05    0.12
  11   7  -2   -0.11    0.15
 -10  -7   2    2.39    0.22
  10  -7  -2    2.07    0.23
 -10  -7   2    2.51    0.25
  10   7  -2    2.27    0.25
 -10   7   2    2.74    0.24
 -10   7   2    2.28    0.17
  10   7  -2    2.33    0.23
  -9  -7   2    0.98    0.19
   9  -7  -2    1.23    0.20
  -9  -7   2    1.54    0.19
  -9   7   2    1.39    0.14
   9   7  -2    1.37    0.21
  -9   7   2    1.62    0.19
   9   7  -2    1.08    0.18
  -8  -7   2   13.97    0.46
  -8  -7   2   13.63    0.47
   8  -7  -2   13.33    0.48
   8   7  -2   13.46    0.47
   8   7  -2   12.99    0.48
  -8   7   2   13.19    0.39
  -7  -7   2    7.74    0.33
   7  -7  -2    8.13    0.37
  -7  -7   2    8.01    0.36
   7   7  -2    8.06    0.36
   7   7  -2    8.50    0.37
  -7   7   2    7.75    0.30
  -6  -7   2   37.63    0.88
  -6  -7   2   35.72    0.90
   6  -7  -2   34.78    0.89
   6   7  -2   37.38    0.92
  -6   7   2   36.98    0.84
  -5  -7   2    1.51    0.19
   5  -7  -2    1.27    0.18
  -5  -7   2    1.44    0.16
  -5   7   2    1.12    0.14
   5   7  -2    1.46    0.18
  -4  -7   2   -0.02    0.12
   4  -7  -2    0.14    0.12
  -4  -7   2    0.13    0.09
  -4   7   2    0.19    0.10
   4   7  -2   -0.10    0.12
   3  -7  -2    4.04    0.24
  -3  -7   2    4.06    0.21
  -3  -7   2    4.07    0.25
  -3   7   2    4.39    0.24
   3   7  -2    4.72    0.27
   2  -7  -2    2.35    0.20
  -2  -7   2    2.08    0.20
  -2   7   2    2.36    0.20
  -2   7   2    1.97    0.19
   2   7  -2    2.71    0.22
  -1  -7   2    3.63    0.20
  -1  -7   2    3.77    0.24
   1  -7  -2    3.77    0.25
  -1   7   2    3.82    0.23
  -1   7   2    3.51    0.25
   1   7  -2    3.61    0.22
   0  -7   2   12.04    0.40
   0  -7  -2   11.97    0.41
   0   7   2   11.59    0.39
   0   7   2   11.93    0.41
   0   7  -2   12.38    0.41
  -1  -7  -2   10.05    0.37
   1  -7   2    9.93    0.36
  -1   7  -2    9.65    0.35
   1   7   2   10.10    0.37
   1   7   2    9.85    0.38
   2  -7   2    0.40    0.13
  -2  -7  -2    0.77    0.15
   2   7   2    0.56    0.13
   2   7   2    0.69    0.07
  -2   7  -2    0.56    0.13
   2   7   2    0.56    0.15
   3  -7   2    5.30    0.26
  -3  -7  -2    5.04    0.28
   3   7   2    5.14    0.14
   3   7   2    5.11    0.27
   3   7   2    5.52    0.30
  -4  -7  -2    0.45    0.13
   4  -7   2    0.73    0.15
   4   7   2    0.66    0.14
   4   7   2    0.72    0.14
   5  -7   2    1.62    0.19
  -5  -7  -2    1.87    0.20
  -5  -7  -2    1.83    0.18
   5   7   2    1.74    0.20
   5   7   2    1.35    0.18
  -6  -7  -2   12.11    0.41
   6  -7   2   10.69    0.41
  -6  -7  -2   11.84    0.42
   6   7   2   11.85    0.42
   6   7   2   11.58    0.42
  -7  -7  -2    1.76    0.20
   7  -7   2    2.30    0.22
  -7  -7  -2    2.03    0.19
   7   7   2    2.07    0.23
   7   7   2    2.29    0.22
   8  -7   2   17.13    0.53
  -8  -7  -2   16.56    0.52
  -8  -7  -2   15.72    0.51
   8   7   2   16.93    0.55
   8   7   2   16.42    0.54
   9  -7   2    1.98    0.22
  -9  -7  -2    1.65    0.19
  -9  -7  -2    2.11    0.21
   9   7   2    1.88    0.21
   9   7   2    2.53    0.25
  10  -7   2    0.92    0.18
 -10  -7  -2    0.83    0.16
  10   7   2    0.79    0.18
  10   7   2    0.86    0.19
  11  -7   2    0.77    0.18
 -11  -7  -2    0.95    0.18
  11   7   2    0.72    0.19
  11   7   2    0.53    0.16
 -12  -7  -2    0.50    0.15
  12  -7   2    0.51    0.17
  12   7   2    0.49    0.17
  12   7   2    0.40    0.17
  13  -7   2    0.23    0.17
 -13  -7  -2   -0.13    0.12
  13   7   2    0.02    0.17
  13   7   2    0.07    0.15
 -14  -7  -2    0.42    0.16
  14  -7   2    0.19    0.18
  14   7   2    0.32    0.19
  14   7   2    0.01    0.14
  15  -7   2    0.57    0.20
  15   7   2    0.73    0.19
  15   7   2    0.61    0.21
  16  -7   2    0.08    0.20
  16   7   2   -0.23    0.19
  17  -7   2    4.79    0.41
  17   7   2    4.78    0.42
  18  -7   2    0.72    0.22
  18   7   2    0.64    0.26
  18  -8  -2    0.11    0.24
  18   8  -2    0.22    0.24
  17  -8  -2    0.28    0.24
  17   8  -2    0.38    0.23
  16  -8  -2    0.41    0.22
  16   8  -2    0.30    0.19
  16   8  -2    0.77    0.25
  15  -8  -2    1.05    0.25
  15   8  -2    1.11    0.24
  15   8  -2    1.04    0.21
  14  -8  -2   -0.15    0.17
  14   8  -2    0.14    0.16
  14   8  -2   -0.13    0.17
  13  -8  -2   -0.11    0.17
  13   8  -2   -0.20    0.18
  13   8  -2   -0.03    0.15
  12  -8  -2    0.27    0.19
  12   8  -2    0.52    0.20
  12   8  -2    0.01    0.14
  11  -8  -2    0.15    0.17
 -11  -8   2    0.24    0.17
  11   8  -2    0.12    0.16
  11   8  -2    0.14    0.16
 -10  -8   2    1.37    0.21
  10  -8  -2    1.48    0.23
 -10   8   2    1.18    0.14
  10   8  -2    1.68    0.23
  10   8  -2    1.09    0.20
   9  -8  -2    0.11    0.15
  -9  -8   2   -0.12    0.15
  -9   8   2   -0.12    0.10
   9   8  -2    0.04    0.15
   9   8  -2   -0.02    0.16
   8  -8  -2    0.15    0.14
  -8  -8   2    0.03    0.13
   8   8  -2   -0.04    0.13
  -8   8   2    0.09    0.11
   8   8  -2   -0.04    0.17
  -7  -8   2    2.96    0.26
   7  -8  -2    2.56    0.24
   7   8  -2    3.31    0.29
  -7   8   2    2.56    0.21
   7   8  -2    3.33    0.28
  -6  -8   2    6.18    0.35
   6  -8  -2    6.53    0.36
   6   8  -2    6.63    0.37
   6   8  -2    6.34    0.34
  -6   8   2    6.89    0.30
  -5  -8   2    2.24    0.24
   5  -8  -2    2.09    0.24
   5   8  -2    2.22    0.24
  -5   8   2    2.06    0.20
  -4  -8   2   -0.04    0.15
   4  -8  -2   -0.01    0.13
   4   8  -2   -0.12    0.13
  -4   8   2    0.01    0.12
  -3  -8   2    0.42    0.16
   3  -8  -2    0.12    0.15
   3   8  -2    0.21    0.16
  -3   8   2    0.03    0.12
   2  -8  -2    0.06    0.14
  -2  -8   2   -0.22    0.13
   2   8  -2    0.23    0.15
  -2   8   2    0.10    0.13
  -2   8   2    0.03    0.12
   1  -8  -2    0.70    0.17
  -1  -8   2    0.50    0.16
  -1   8   2    0.40    0.16
  -1   8   2    0.71    0.16
   1   8  -2    0.31    0.13
   0  -8  -2    2.41    0.22
   0  -8   2    2.71    0.24
   0   8  -2    2.40    0.22
   0   8   2    2.49    0.24
   0   8   2    3.08    0.23
   1  -8   2    0.57    0.16
  -1  -8  -2    0.63    0.15
   1   8   2    0.62    0.14
   1   8   2    0.43    0.16
  -1   8  -2    0.56    0.14
   2  -8   2    0.39    0.15
  -2  -8  -2    0.51    0.16
   2   8   2    0.43    0.14
   2   8   2    0.35    0.16
  -2   8  -2    0.39    0.13
   3  -8   2    1.58    0.20
  -3  -8  -2    1.68    0.19
   3   8   2    1.59    0.20
   3   8   2    1.85    0.22
  -4  -8  -2   20.60    0.59
   4  -8   2   20.18    0.61
  -4  -8  -2   20.10    0.61
   4   8   2   20.57    0.62
   4   8   2   20.96    0.64
   5  -8   2    1.70    0.21
  -5  -8  -2    2.04    0.22
  -5  -8  -2    1.90    0.21
   5   8   2    2.12    0.24
   5   8   2    1.54    0.21
   6  -8   2   -0.03    0.13
  -6  -8  -2   -0.11    0.11
  -6  -8  -2    0.01    0.14
   6   8   2   -0.03    0.13
   6   8   2   -0.09    0.13
   7  -8   2   11.29    0.44
  -7  -8  -2   11.30    0.44
  -7  -8  -2   11.08    0.42
   7   8   2   10.87    0.46
   7   8   2   10.82    0.44
  -8  -8  -2    0.14    0.14
   8  -8   2    0.29    0.16
  -8  -8  -2    0.21    0.13
   8   8   2    0.26    0.17
   8   8   2    0.11    0.15
  -9  -8  -2    0.01    0.13
   9  -8   2    0.19    0.15
   9   8   2    0.01    0.13
   9   8   2   -0.03    0.16
 -10  -8  -2    0.19    0.14
  10  -8   2    0.30    0.16
  10   8   2    0.49    0.18
  10   8   2    0.25    0.17
 -11  -8  -2    1.61    0.22
  11  -8   2    1.69    0.24
  11   8   2    1.74    0.26
  11   8   2    1.67    0.23
  12  -8   2    0.00    0.17
  12   8   2    0.23    0.18
  12   8   2   -0.02    0.16
  13  -8   2    0.12    0.18
  13   8   2   -0.07    0.15
  13   8   2    0.08    0.19
  14  -8   2    0.16    0.18
  14   8   2    0.23    0.19
  14   8   2   -0.13    0.15
  15  -8   2    1.26    0.25
  15   8   2    1.72    0.29
  15   8   2    0.75    0.21
  16  -8   2    0.51    0.22
  16   8   2    0.71    0.25
  17  -8   2    0.85    0.25
  17   8   2    0.67    0.26
  17  -9  -2    0.70    0.27
  17   9  -2    1.46    0.32
  16  -9  -2   -0.08    0.20
  16   9  -2   -0.22    0.23
  16   9  -2    0.09    0.19
  15  -9  -2    0.94    0.26
  15   9  -2    1.96    0.32
  15   9  -2    1.10    0.23
  14  -9  -2    0.44    0.23
  14   9  -2    0.38    0.19
  14   9  -2    0.15    0.21
  13  -9  -2    0.27    0.20
  13   9  -2    0.27    0.17
  13   9  -2    0.01    0.22
  12  -9  -2    0.11    0.19
  12   9  -2    0.21    0.20
  12   9  -2    0.05    0.16
  11  -9  -2    1.03    0.23
  11   9  -2    0.88    0.20
  11   9  -2    0.84    0.21
  10  -9  -2    0.52    0.21
 -10  -9   2    0.81    0.21
  10   9  -2    0.64    0.21
  10   9  -2    0.31    0.17
  -9  -9   2    1.14    0.23
   9  -9  -2    1.33    0.23
  -9   9   2    0.87    0.16
   9   9  -2    1.09    0.23
   9   9  -2    1.36    0.22
   8  -9  -2    0.27    0.19
  -8  -9   2    0.36    0.17
   8   9  -2    0.62    0.19
   8   9  -2    0.84    0.20
  -8   9   2    0.92    0.16
   7  -9  -2   -0.03    0.14
  -7  -9   2    0.22    0.15
  -7   9   2    0.13    0.13
   7   9  -2   -0.09    0.16
   7   9  -2    0.04    0.18
   6  -9  -2    0.05    0.17
  -6  -9   2    0.33    0.18
   6   9  -2    0.04    0.17
  -6   9   2   -0.04    0.12
   6   9  -2    0.13    0.15
   5  -9  -2    0.11    0.16
  -5  -9   2    0.39    0.17
   5   9  -2   -0.03    0.14
   5   9  -2    0.13    0.17
  -5   9   2    0.06    0.13
   4  -9  -2    1.48    0.23
  -4  -9   2    1.43    0.22
  -4   9   2    1.28    0.19
   4   9  -2    1.45    0.22
  -3  -9   2   -0.07    0.16
   3  -9  -2    0.18    0.15
  -3   9   2    0.39    0.15
   3   9  -2    0.08    0.17
  -2  -9   2    1.47    0.21
   2  -9  -2    1.91    0.24
  -2   9   2    1.57    0.21
  -2   9   2    1.49    0.22
   2   9  -2    1.60    0.21
  -1  -9   2    0.89    0.20
   1  -9  -2    0.86    0.18
   1   9  -2    1.28    0.20
  -1   9   2    0.79    0.18
  -1   9   2    1.24    0.21
   0  -9  -2    3.47    0.30
   0  -9   2    3.23    0.27
   0   9   2    4.02    0.29
   0   9  -2    3.04    0.26
   0   9   2    3.71    0.31
  -1  -9  -2    5.88    0.35
   1  -9   2    6.29    0.36
   1   9   2    6.32    0.35
   1   9   2    6.59    0.34
  -1   9  -2    5.89    0.34
   2  -9   2    3.32    0.29
  -2  -9  -2    3.43    0.30
  -2   9  -2    3.22    0.28
   2   9   2    3.07    0.27
   2   9   2    3.85    0.28
  -3  -9  -2    4.26    0.31
   3  -9   2    3.61    0.30
   3   9   2    4.87    0.33
   3   9   2    4.28    0.32
  -4  -9  -2   -0.08    0.14
   4  -9   2    0.11    0.15
   4   9   2    0.19    0.15
   4   9   2    0.02    0.16
  -5  -9  -2    0.22    0.16
   5  -9   2    0.21    0.15
   5   9   2    0.19    0.16
   5   9   2    0.17    0.15
  -6  -9  -2    0.41    0.15
   6  -9   2    0.22    0.16
   6   9   2    0.09    0.14
   6   9   2    0.02    0.14
   7  -9   2    0.19    0.16
  -7  -9  -2    0.03    0.15
   7   9   2   -0.03    0.15
   7   9   2   -0.13    0.16
   8  -9   2    0.13    0.16
   8   9   2    0.23    0.15
   8   9   2    0.11    0.17
   9  -9   2    0.48    0.19
   9   9   2    0.27    0.19
   9   9   2   -0.06    0.15
  10  -9   2    0.13    0.18
  10   9   2    0.58    0.20
  10   9   2    0.77    0.20
  11  -9   2    0.85    0.22
  11   9   2    0.51    0.18
  11   9   2    0.99    0.24
  12  -9   2    1.08    0.23
  12   9   2    1.16    0.23
  12   9   2    1.01    0.25
  13  -9   2    1.18    0.25
  13   9   2    0.88    0.26
  13   9   2    0.73    0.21
  14  -9   2    0.54    0.23
  14   9   2    0.70    0.24
  14   9   2    0.99    0.23
  15  -9   2   -0.01    0.20
  15   9   2   -0.06    0.18
  15   9   2    0.30    0.23
  16  -9   2    0.14    0.22
  16   9   2    0.20    0.24
  15 -10  -2    0.02    0.23
  15  10  -2    0.33    0.26
  15  10  -2    0.19    0.20
  14 -10  -2    0.69    0.26
  14  10  -2    0.62    0.24
  14  10  -2    0.51    0.20
  13 -10  -2   -0.53    0.19
  13  10  -2    0.13    0.24
  13  10  -2   -0.08    0.17
  12 -10  -2    0.57    0.24
  12  10  -2    0.85    0.22
  12  10  -2    1.11    0.28
  11 -10  -2    1.11    0.23
  11  10  -2    0.91    0.24
  11  10  -2    0.89    0.23
 -10 -10   2    0.50    0.21
  10 -10  -2    0.69    0.22
  10  10  -2    0.18    0.19
  10  10  -2    0.78    0.22
   9 -10  -2    0.87    0.24
  -9 -10   2    1.20    0.23
   9  10  -2    0.93    0.23
  -9  10   2    0.81    0.16
   9  10  -2    0.66    0.22
   8 -10  -2    0.33    0.20
  -8 -10   2    0.67    0.21
  -8  10   2    0.31    0.15
   8  10  -2    0.42    0.20
   8  10  -2    0.62    0.21
  -7 -10   2    0.11    0.18
   7 -10  -2   -0.02    0.17
   7  10  -2   -0.04    0.16
   7  10  -2   -0.02    0.15
  -7  10   2   -0.06    0.14
   6 -10  -2   -0.14    0.15
  -6 -10   2    0.04    0.17
  -6  10   2   -0.13    0.13
   6  10  -2    0.00    0.18
   6  10  -2   -0.07    0.18
  -5 -10   2   -0.04    0.17
   5 -10  -2    0.17    0.19
  -5  10   2   -0.08    0.14
   5  10  -2    0.32    0.18
   5  10  -2   -0.04    0.18
   4 -10  -2    1.56    0.24
  -4 -10   2    1.42    0.25
   4  10  -2    2.07    0.26
  -4  10   2    1.96    0.23
   4  10  -2    2.33    0.28
   3 -10  -2    2.71    0.28
  -3 -10   2    1.99    0.25
  -3  10   2    2.79    0.27
   3  10  -2    2.16    0.25
   3  10  -2    3.01    0.30
  -2 -10   2    1.10    0.21
   2 -10  -2    1.09    0.22
   2  10  -2    1.00    0.20
  -2  10   2    1.19    0.20
  -1 -10   2    0.07    0.18
   1 -10  -2    0.05    0.15
   1  10  -2    0.35    0.16
  -1  10   2    0.22    0.18
  -1  10   2    0.60    0.19
   0 -10  -2    0.68    0.20
   0 -10   2    0.69    0.19
   0  10   2    0.83    0.21
   0  10   2    0.63    0.20
   0  10  -2    0.54    0.19
   1 -10   2    0.26    0.16
  -1 -10  -2   -0.03    0.16
  -1  10  -2    0.05    0.16
   1  10   2    0.02    0.15
   1  10   2    0.06    0.14
  -2 -10  -2    0.07    0.15
   2 -10   2    0.03    0.18
   2  10   2    0.14    0.17
   2  10   2   -0.03    0.17
  -2  10  -2   -0.13    0.15
   3 -10   2    1.39    0.23
  -3 -10  -2    1.13    0.22
   3  10   2    1.09    0.22
   3  10   2    1.11    0.23
   4 -10   2    5.54    0.37
  -4 -10  -2    5.09    0.36
   4  10   2    5.15    0.35
   4  10   2    4.64    0.33
   5 -10   2    3.35    0.31
  -5 -10  -2    3.08    0.29
   5  10   2    3.13    0.30
   5  10   2    3.98    0.33
  -6 -10  -2    0.11    0.17
   6 -10   2    0.17    0.17
   6  10   2    0.04    0.18
   6  10   2    0.17    0.18
  -7 -10  -2    1.06    0.26
   7 -10   2    0.45    0.18
   7  10   2    0.89    0.22
   7  10   2    0.50    0.20
   8 -10   2   -0.01    0.18
   8  10   2    0.00    0.18
   8  10   2    0.07    0.18
   9 -10   2    0.36    0.20
   9  10   2    0.29    0.19
   9  10   2    0.24    0.20
  10 -10   2    0.78    0.23
  10  10   2    0.71    0.20
  10  10   2    0.43    0.22
  11 -10   2   -0.37    0.18
  11  10   2    0.04    0.20
  11  10   2    0.00    0.17
  12 -10   2   -0.09    0.20
  12  10   2    0.46    0.22
  12  10   2    0.28    0.21
  13 -10   2    0.10    0.21
  13  10   2   -0.11    0.18
  13  10   2    0.24    0.23
  14 -10   2    0.55    0.24
  14  10   2    1.17    0.26
  14  10   2    0.09    0.23
  14 -11  -2    0.34    0.25
  14  11  -2    0.08    0.21
  14  11  -2   -0.04    0.25
  13 -11  -2    2.77    0.37
  13  11  -2    2.59    0.32
  13  11  -2    3.60    0.41
  12 -11  -2    0.65    0.26
  12  11  -2    0.93    0.29
  12  11  -2    0.07    0.20
  11 -11  -2    0.89    0.26
  11  11  -2    0.50    0.26
  11  11  -2    0.07    0.19
  10 -11  -2    0.41    0.24
  10  11  -2    0.12    0.19
  10  11  -2    0.45    0.25
   9 -11  -2    0.63    0.25
  -9 -11   2    0.44    0.23
   9  11  -2    0.80    0.26
   9  11  -2    0.37    0.22
  -8 -11   2    0.20    0.20
   8 -11  -2    0.08    0.19
  -8  11   2    0.01    0.15
   8  11  -2    0.14    0.19
   8  11  -2    0.13    0.18
  -7 -11   2    0.59    0.22
   7 -11  -2    0.64    0.24
   7  11  -2    0.80    0.23
  -7  11   2    0.65    0.19
   7  11  -2    0.38    0.21
  -6 -11   2    1.19    0.26
   6 -11  -2    1.25    0.24
   6  11  -2    1.42    0.27
  -6  11   2    1.18    0.21
   6  11  -2    1.58    0.27
   5 -11  -2    0.02    0.17
  -5 -11   2    0.07    0.19
  -5  11   2   -0.12    0.14
   5  11  -2    0.31    0.19
   5  11  -2   -0.09    0.18
  -4 -11   2   -0.11    0.16
   4 -11  -2   -0.05    0.17
   4  11  -2    0.06    0.17
   4  11  -2    0.17    0.19
  -4  11   2    0.15    0.17
   3 -11  -2    0.22    0.18
  -3 -11   2    0.25    0.20
  -3  11   2    0.08    0.16
   3  11  -2    0.19    0.17
   3  11  -2   -0.15    0.15
  -2 -11   2    3.60    0.33
   2 -11  -2    3.90    0.35
   2  11  -2    3.31    0.30
   2  11  -2    3.76    0.32
  -2  11   2    4.04    0.34
   1 -11  -2    0.21    0.20
  -1 -11   2    0.14    0.18
   1  11  -2    0.00    0.17
  -1  11   2    0.26    0.16
   1  11  -2   -0.05    0.17
  -1  11   2   -0.11    0.15
   0 -11  -2    0.43    0.20
   0 -11   2    0.26    0.18
   0  11   2    0.38    0.21
   0  11   2    0.29    0.18
   0  11  -2    0.20    0.18
   0  11  -2    0.21    0.17
   1 -11   2   -0.06    0.18
  -1 -11  -2   -0.12    0.18
   1  11   2   -0.13    0.14
   1  11   2   -0.07    0.19
  -1  11  -2    0.00    0.17
   2 -11   2   -0.28    0.18
  -2 -11  -2   -0.04    0.17
   2  11   2   -0.02    0.18
   2  11   2   -0.20    0.17
  -3 -11  -2   -0.03    0.15
   3 -11   2    0.03    0.18
   3  11   2    0.04    0.18
   3  11   2   -0.09    0.19
  -4 -11  -2    3.03    0.32
   4 -11   2    2.85    0.32
   4  11   2    2.91    0.33
   4  11   2    2.60    0.30
   5 -11   2    1.06    0.24
  -5 -11  -2    1.15    0.22
   5  11   2    0.85    0.23
   5  11   2    1.16    0.26
  -6 -11  -2   -0.15    0.18
   6 -11   2    0.19    0.19
   6  11   2   -0.04    0.20
   6  11   2   -0.11    0.19
   7 -11   2    0.91    0.24
   7  11   2    1.06    0.26
   7  11   2    0.45    0.19
  -7  11  -2    0.55    0.18
   8 -11   2    0.42    0.22
   8  11   2    0.30    0.24
  -8  11  -2    0.38    0.17
   8  11   2    0.85    0.23
   9 -11   2    1.40    0.28
   9  11   2    1.17    0.26
   9  11   2    2.13    0.32
  10 -11   2    0.12    0.22
  10  11   2    0.19    0.23
  10  11   2   -0.02    0.16
  11 -11   2    0.33    0.23
  11  11   2   -0.08    0.20
  11  11   2    0.27    0.23
  12 -11   2    0.17    0.23
  12  11   2    0.65    0.24
  12  11   2    0.05    0.21
  13 -11   2   -0.04    0.23
  13  11   2    0.54    0.22
  13  11   2   -0.02    0.24
  12 -12  -2    0.34    0.26
  12  12  -2    0.32    0.26
  12  12  -2    0.45    0.28
  11 -12  -2   -0.21    0.24
  11  12  -2    0.22    0.22
  11  12  -2    0.07    0.24
  10 -12  -2    0.18    0.25
  10  12  -2    0.09    0.21
  10  12  -2    0.28    0.26
   9 -12  -2    1.41    0.30
   9  12  -2    1.12    0.27
   9  12  -2    0.88    0.30
   8 -12  -2    0.47    0.25
  -8 -12   2    0.31    0.23
   8  12  -2   -0.16    0.22
   8  12  -2    0.45    0.24
  -7 -12   2    0.15    0.22
   7 -12  -2    0.21    0.24
   7  12  -2   -0.07    0.21
   7  12  -2    0.27    0.23
  -7  12   2   -0.01    0.16
  -6 -12   2    2.44    0.33
   6 -12  -2    2.50    0.34
  -6  12   2    2.01    0.26
   6  12  -2    1.52    0.29
   6  12  -2    2.14    0.31
  -5 -12   2    0.32    0.22
   5 -12  -2    0.08    0.19
   5  12  -2    0.02    0.18
  -5  12   2   -0.26    0.15
   5  12  -2    0.15    0.19
  -4 -12   2    4.58    0.40
   4 -12  -2    5.04    0.43
   4  12  -2    4.06    0.37
   4  12  -2    4.16    0.36
  -4  12   2    3.87    0.34
   3 -12  -2    0.04    0.19
  -3 -12   2    0.11    0.21
   3  12  -2    0.15    0.20
  -3  12   2    0.03    0.17
   3  12  -2   -0.27    0.16
   2 -12  -2   -0.47    0.19
  -2 -12   2    0.14    0.22
  -2  12   2   -0.24    0.17
   2  12  -2   -0.22    0.15
   2  12  -2   -0.20    0.18
  -1 -12   2    2.39    0.31
   1 -12  -2    2.41    0.31
  -1  12   2    2.22    0.29
   1  12  -2    2.51    0.31
   1  12  -2    2.25    0.30
   0 -12  -2    0.14    0.19
   0 -12   2   -0.19    0.17
   0  12  -2    0.39    0.22
   0  12   2    0.22    0.19
   0  12   2    0.18    0.20
   0  12  -2    0.05    0.17
  -1 -12  -2    2.52    0.32
   1 -12   2    1.94    0.31
  -1  12  -2    1.49    0.26
   1  12   2    1.37    0.27
   1  12   2    1.98    0.30
   2 -12   2    0.44    0.22
  -2 -12  -2    0.23    0.22
  -2  12  -2    0.56    0.19
   2  12   2    0.73    0.23
   2  12   2    1.00    0.24
   3 -12   2    0.80    0.25
  -3 -12  -2    0.29    0.21
   3  12   2    0.32    0.21
   3  12   2    0.41    0.20
  -3  12  -2    0.51    0.21
   4 -12   2   -0.26    0.20
  -4 -12  -2    0.21    0.20
   4  12   2   -0.09    0.20
  -4  12  -2   -0.12    0.17
   4  12   2   -0.08    0.19
   5 -12   2    0.27    0.20
   5  12   2    0.40    0.22
  -5  12  -2    0.17    0.19
   5  12   2    0.46    0.23
   6 -12   2   -0.36    0.20
   6  12   2    0.17    0.22
  -6  12  -2   -0.05    0.17
   6  12   2    0.40    0.23
   7 -12   2    0.03    0.23
  -7  12  -2   -0.18    0.17
   7  12   2    0.22    0.22
   7  12   2    0.01    0.21
   8 -12   2    0.09    0.23
   8  12   2   -0.14    0.20
   8  12   2    0.39    0.25
   9 -12   2    0.82    0.27
   9  12   2    1.29    0.27
   9  12   2    1.15    0.29
  10 -12   2    0.03    0.23
  10  12   2    0.06    0.22
  10  12   2    0.41    0.26
  11 -12   2    0.46    0.26
  11  12   2   -0.17    0.24
   9 -13  -2    0.18    0.26
   9  13  -2   -0.06    0.22
   8 -13  -2    1.59    0.35
   8  13  -2    1.49    0.32
   8  13  -2    1.98    0.34
  -7 -13   2    0.23    0.23
   7 -13  -2    0.60    0.28
   7  13  -2    0.02    0.24
   7  13  -2    0.14    0.24
  -7  13   2    0.11    0.21
  -6 -13   2    1.52    0.31
   6 -13  -2    1.51    0.30
   6  13  -2    1.29    0.28
  -6  13   2    1.62    0.26
   6  13  -2    1.94    0.33
  -5 -13   2    0.03    0.23
   5 -13  -2    0.20    0.26
  -5  13   2   -0.11    0.19
   5  13  -2    0.23    0.25
   5  13  -2   -0.06    0.22
   4 -13  -2    0.42    0.26
  -4 -13   2    0.63    0.27
   4  13  -2    0.16    0.23
  -4  13   2    0.14    0.20
   4  13  -2    0.37    0.25
  -3 -13   2    1.50    0.29
   3 -13  -2    1.40    0.28
   3  13  -2    1.40    0.28
   3  13  -2    1.56    0.29
  -3  13   2    0.97    0.24
   2 -13  -2    0.29    0.25
  -2 -13   2   -0.11    0.20
   2  13  -2    0.25    0.23
  -2  13   2    0.09    0.19
   2  13  -2   -0.10    0.19
   1 -13  -2    3.57    0.39
  -1 -13   2    4.66    0.43
  -1  13   2    3.20    0.35
   1  13  -2    4.10    0.38
   0 -13  -2    0.29    0.24
   0 -13   2    0.19    0.23
   0  13  -2   -0.16    0.19
   0  13   2    0.07    0.18
   1 -13   2    0.20    0.21
  -1 -13  -2    0.02    0.20
   1  13   2   -0.14    0.21
  -1  13  -2   -0.02    0.19
   1  13   2    0.16    0.19
  -2 -13  -2    0.29    0.24
   2 -13   2    0.17    0.24
   2  13   2    0.20    0.21
   2  13   2    0.68    0.26
  -2  13  -2    0.02    0.20
  -3 -13  -2   -0.48    0.20
   3 -13   2   -0.32    0.22
   3  13   2    0.20    0.22
  -3  13  -2    0.14    0.20
   3  13   2   -0.35    0.21
   4 -13   2    0.05    0.23
   4  13   2   -0.10    0.22
  -4  13  -2   -0.22    0.17
   4  13   2   -0.20    0.21
   5 -13   2    0.14    0.25
   5  13   2    0.01    0.22
  -5  13  -2   -0.05    0.18
   5  13   2    0.21    0.23
   6 -13   2    0.29    0.26
   6  13   2    0.41    0.27
   6  13   2    0.21    0.24
  -6  13  -2   -0.08    0.18
   7 -13   2    0.40    0.25
   7  13   2    0.14    0.24
   7  13   2    0.56    0.27
   8 -13   2    0.68    0.28
   8  13   2    1.71    0.33
  -5 -14   2    0.85    0.27
   5 -14  -2    0.64    0.30
  -5  14   2    0.78    0.24
   5  14  -2    0.24    0.26
  -4 -14   2   -0.30    0.24
   4 -14  -2    0.60    0.30
  -4  14   2   -0.36    0.19
   4  14  -2    0.11    0.27
  -3 -14   2    1.05    0.31
   3 -14  -2    1.46    0.34
  -3  14   2    0.94    0.27
   3  14  -2    1.56    0.49
   2 -14  -2   -0.01    0.25
  -2 -14   2   -0.15    0.25
   2  14  -2    0.11    0.23
  -2  14   2    0.12    0.23
   1 -14  -2   -0.06    0.26
  -1 -14   2    0.09    0.26
  -1  14   2   -0.38    0.21
   1  14  -2    0.13    0.22
   0 -14  -2    0.94    0.30
   0 -14   2    0.63    0.28
   0  14  -2   -0.06    0.23
   0  14   2    0.02    0.21
  -1 -14  -2    0.14    0.25
   1 -14   2    0.13    0.26
   1  14   2    0.11    0.22
  -1  14  -2    0.16    0.23
   1  14   2    0.15    0.23
  -2 -14  -2    0.41    0.27
   2 -14   2    0.06    0.26
  -2  14  -2   -0.11    0.21
   2  14   2   -0.29    0.20
   2  14   2    0.22    0.26
   3 -14   2    2.54    0.37
   3  14   2    2.36    0.35
  -3  14  -2    1.87    0.30
   4 -14   2    0.15    0.27
  -4  14  -2   -0.30    0.18
   4  14   2    0.62    0.27
  22   0  -3   -0.02    0.21
  21   0  -3    0.51    0.24
  20   0  -3   -0.05    0.19
  19   0  -3    0.01    0.19
  18   0  -3    0.02    0.17
  17   0  -3    1.80    0.25
  16   0  -3    0.05    0.14
  15   0  -3    9.54    0.42
  14   0  -3   -0.01    0.13
 -14   0   3   -0.11    0.10
 -13   0   3    6.69    0.29
  13   0  -3    6.03    0.31
  12   0  -3    0.18    0.12
 -12   0   3    0.05    0.09
  11   0  -3   66.92    1.43
 -11   0   3   66.96    1.41
  10   0  -3    0.01    0.03
 -10   0   3    0.08    0.08
  10   0  -3    0.06    0.08
   9   0  -3    7.37    0.17
   9   0  -3    7.17    0.27
  -9   0   3    7.22    0.26
   8   0  -3   -0.09    0.08
   8   0  -3   -0.05    0.03
  -8   0   3   -0.06    0.07
  -7   0   3   64.12    1.30
   7   0  -3   63.56    1.31
  -6   0   3    0.02    0.06
   6   0  -3   -0.02    0.06
   5   0  -3   33.87    0.71
  -5   0   3   33.07    0.71
  -4   0   3    0.02    0.06
   4   0  -3   -0.04    0.07
   4   0  -3   -0.04    0.03
   3   0  -3  453.28    8.60
   3   0  -3  448.14    8.69
  -3   0   3  459.72    8.64
   2   0  -3    0.03    0.05
   2   0  -3    0.00    0.03
  -2   0   3    0.06    0.04
  -2   0   3   -0.06    0.04
  -2   0   3    0.02    0.04
   1   0  -3   16.83    0.34
  -1   0   3   16.78    0.34
  -1   0   3   16.49    0.34
  -1   0   3   16.44    0.35
   1   0  -3   16.51    0.35
   0   0   3   -0.47    0.05
   0   0  -3   -0.56    0.04
   1   0   3   96.79    1.85
  -1   0  -3   97.08    1.85
   1   0   3   95.80    1.85
   2   0   3   -0.26    0.06
  -2   0  -3   -0.25    0.05
  -2   0  -3   -0.23    0.05
   2   0   3   -0.23    0.07
   3   0   3    0.22    0.03
  -3   0  -3    0.10    0.05
  -3   0  -3    0.14    0.05
   3   0   3    0.16    0.05
   3   0   3    0.19    0.06
   3   0   3    0.14    0.03
   4   0   3   -0.01    0.05
  -4   0  -3    0.00    0.05
   4   0   3   -0.02    0.03
   4   0   3    0.09    0.06
   4   0   3    0.00    0.03
   5   0   3    0.98    0.08
  -5   0  -3    0.95    0.08
   5   0   3    1.48    0.08
   5   0   3    1.03    0.07
  -6   0  -3   -0.07    0.04
   6   0   3   -0.10    0.05
  -6   0  -3   -0.15    0.05
   6   0   3   -0.07    0.02
   6   0   3   -0.05    0.05
   7   0   3   10.32    0.27
   7   0   3    9.68    0.27
  -7   0  -3   10.38    0.25
  -7   0  -3   10.37    0.27
   8   0   3   -0.01    0.04
   8   0   3    0.01    0.05
   8   0   3   -0.06    0.06
  -8   0  -3    0.01    0.05
  -8   0  -3    0.04    0.06
  -9   0  -3   45.29    0.94
   9   0   3   45.47    0.95
  -9   0  -3   48.12    0.99
   9   0   3   44.26    0.96
   9   0   3   45.80    0.97
 -10   0  -3    0.04    0.06
  10   0   3    0.14    0.08
  10   0   3   -0.07    0.06
  10   0   3   -0.09    0.06
 -11   0  -3    0.02    0.07
  11   0   3   -0.02    0.06
  11   0   3   -0.03    0.09
 -12   0  -3    0.04    0.09
  12   0   3    0.15    0.08
  12   0   3    0.08    0.11
  13   0   3   40.71    0.88
 -13   0  -3   40.89    0.93
  13   0   3   42.28    0.96
 -14   0  -3    0.00    0.10
  14   0   3   -0.12    0.11
  15   0   3    2.51    0.22
 -15   0  -3    2.66    0.21
 -16   0  -3    0.05    0.12
  16   0   3    0.16    0.14
  17   0   3    0.24    0.15
  18   0   3    0.34    0.16
  19   0   3    0.18    0.18
  20   0   3    0.17    0.18
  21  -1  -3   -0.01    0.20
  21   1  -3    0.13    0.22
  20  -1  -3    0.58    0.22
  20   1  -3    0.21    0.21
  19  -1  -3    0.32    0.20
  19   1  -3    0.30    0.19
  18  -1  -3    2.34    0.28
  18   1  -3    2.02    0.26
  17  -1  -3    0.88    0.20
  17   1  -3    0.63    0.18
  16  -1  -3    1.09    0.19
  16   1  -3    1.14    0.20
  15  -1  -3   15.03    0.52
  15   1  -3   15.19    0.52
  14  -1  -3    2.41    0.23
 -14  -1   3    2.21    0.19
 -14  -1   3    2.33    0.21
  14   1  -3    1.81    0.21
 -13  -1   3   13.11    0.43
  13  -1  -3   13.54    0.45
 -13  -1   3   13.03    0.43
 -13   1   3   13.05    0.42
  13   1  -3   13.02    0.45
  13   1  -3   12.87    0.31
 -12  -1   3    9.40    0.34
 -12  -1   3    8.95    0.33
  12  -1  -3    9.51    0.36
  12   1  -3    9.61    0.37
  12   1  -3    9.22    0.25
 -12   1   3    9.78    0.34
 -11  -1   3    5.10    0.24
 -11  -1   3    5.76    0.25
  11  -1  -3    5.52    0.27
 -11   1   3    5.52    0.24
  11   1  -3    5.50    0.17
  11   1  -3    5.53    0.27
  10  -1  -3   18.52    0.51
 -10  -1   3   19.16    0.50
 -10  -1   3   19.93    0.50
  10   1  -3   19.65    0.52
 -10   1   3   18.30    0.49
  10   1  -3   18.96    0.42
  -9  -1   3    0.13    0.07
   9  -1  -3    0.02    0.08
  -9  -1   3    0.12    0.08
   9   1  -3    0.16    0.05
   9   1  -3    0.27    0.10
  -9   1   3    0.14    0.07
  -8  -1   3    8.34    0.27
   8  -1  -3    8.44    0.28
  -8  -1   3    7.93    0.26
  -8   1   3    8.26    0.27
   8   1  -3    8.24    0.22
   8   1  -3    8.62    0.29
  -7  -1   3    1.46    0.12
   7  -1  -3    1.66    0.13
  -7  -1   3    1.24    0.11
  -7   1   3    1.21    0.11
   7   1  -3    1.29    0.12
  -6  -1   3   24.44    0.55
  -6  -1   3   25.72    0.57
   6  -1  -3   24.76    0.57
  -6   1   3   24.66    0.56
   6   1  -3   24.53    0.57
  -5  -1   3    0.04    0.05
  -5  -1   3    0.08    0.07
   5  -1  -3    0.10    0.07
   5  -1  -3    0.11    0.02
  -5   1   3    0.11    0.06
   5   1  -3    0.02    0.07
  -4  -1   3   99.25    1.97
  -4  -1   3  102.43    1.96
   4  -1  -3  101.90    1.97
   4  -1  -3  102.68    1.92
  -4   1   3  101.69    1.97
   4   1  -3  100.49    1.97
  -4   1   3  104.22    1.92
  -3  -1   3    1.75    0.11
   3  -1  -3    2.01    0.09
   3  -1  -3    2.15    0.12
   3   1  -3    2.16    0.12
  -3   1   3    2.26    0.09
  -3   1   3    2.27    0.13
   2  -1  -3   26.21    0.54
  -2  -1   3   25.66    0.54
   2  -1  -3   26.77    0.53
  -2   1   3   25.99    0.53
   2   1  -3   26.42    0.53
   2   1  -3   25.98    0.54
  -1  -1   3  152.22    2.79
   1  -1  -3  149.49    2.79
   1  -1  -3  145.82    2.79
  -1  -1   3  146.20    2.78
   1   1  -3  147.74    2.78
  -1   1   3  143.27    2.79
   1   1  -3  147.87    2.81
  -1   1   3  147.59    2.79
   0  -1   3    0.48    0.05
   0  -1   3    0.33    0.06
   0  -1  -3    0.49    0.05
   0  -1  -3    0.47    0.06
   0   1   3    0.50    0.06
   0   1  -3    0.45    0.04
   0   1   3    0.43    0.05
   0   1   3    0.42    0.05
   1  -1   3   54.85    1.11
   1  -1   3   59.79    1.15
   1  -1   3   59.01    1.11
  -1  -1  -3   58.15    1.15
  -1  -1  -3   60.00    1.12
  -1   1  -3   58.20    1.14
   1   1   3   59.34    1.12
   1   1   3   59.12    1.15
  -1   1  -3   58.24    1.15
   2  -1   3   37.13    0.76
  -2  -1  -3   37.41    0.72
  -2  -1  -3   36.01    0.75
   2  -1   3   37.02    0.75
   2  -1   3   37.03    0.71
   2   1   3   36.66    0.74
  -2   1  -3   36.80    0.74
   2   1   3   37.16    0.72
   2   1   3   36.67    0.75
  -2   1  -3   37.46    0.76
  -3  -1  -3   68.96    1.30
   3  -1   3   69.08    1.30
  -3  -1  -3   68.74    1.33
   3  -1   3   68.30    1.30
  -3  -1  -3   68.40    1.34
   3  -1   3   69.18    1.36
   3  -1   3   67.74    1.33
   3   1   3   68.99    1.35
  -3   1  -3   65.77    1.33
   3   1   3   68.92    1.31
   3   1   3   68.62    1.33
   4  -1   3    6.56    0.19
  -4  -1  -3    6.35    0.19
  -4  -1  -3    6.59    0.19
   4  -1   3    6.73    0.16
   4  -1   3    6.59    0.16
  -4  -1  -3    6.63    0.16
   4   1   3    6.61    0.19
   4   1   3    6.53    0.18
   4   1   3    6.46    0.20
  -4   1  -3    6.53    0.19
   5  -1   3    3.08    0.11
   5  -1   3    2.81    0.11
  -5  -1  -3    2.94    0.14
  -5  -1  -3    2.93    0.11
   5  -1   3    2.91    0.13
   5   1   3    2.88    0.12
  -5   1  -3    2.97    0.12
  -5   1  -3    2.99    0.08
   5   1   3    2.85    0.14
  -6  -1  -3    9.33    0.26
  -6  -1  -3    9.21    0.23
   6  -1   3    9.73    0.25
   6  -1   3    9.04    0.24
   6   1   3    9.31    0.27
  -6   1  -3    8.94    0.24
  -6   1  -3    9.54    0.22
   6   1   3    9.47    0.25
  -7  -1  -3   33.17    0.67
   7  -1   3   32.20    0.68
  -7  -1  -3   32.35    0.67
   7  -1   3   32.13    0.69
  -7   1  -3   32.08    0.68
   7   1   3   32.22    0.70
   7   1   3   32.68    0.69
  -7   1  -3   32.70    0.66
   7   1   3   32.43    0.70
  -8  -1  -3    1.01    0.09
   8  -1   3    1.02    0.10
   8  -1   3    1.05    0.09
  -8  -1  -3    0.99    0.09
  -8   1  -3    1.05    0.08
  -8   1  -3    0.97    0.09
   8   1   3    1.01    0.10
   8   1   3    1.03    0.10
   8   1   3    0.98    0.10
   9  -1   3    0.12    0.07
   9  -1   3    0.11    0.06
  -9  -1  -3    0.14    0.06
   9  -1   3    0.03    0.06
  -9  -1  -3    0.14    0.06
   9   1   3    0.11    0.07
  -9   1  -3    0.05    0.06
   9   1   3    0.04    0.07
   9   1   3    0.10    0.07
  -9   1  -3    0.13    0.06
  10  -1   3    0.59    0.08
  10  -1   3    0.51    0.10
 -10  -1  -3    0.70    0.09
  10  -1   3    0.48    0.09
 -10  -1  -3    0.48    0.09
  10   1   3    0.71    0.10
  10   1   3    0.49    0.09
 -10   1  -3    0.69    0.09
 -10   1  -3    0.62    0.08
  10   1   3    0.50    0.10
  11  -1   3    0.53    0.11
  11  -1   3    0.57    0.08
 -11  -1  -3    0.46    0.10
  11   1   3    0.43    0.11
 -11   1  -3    0.46    0.09
  11   1   3    0.52    0.09
 -11   1  -3    0.42    0.08
 -12  -1  -3    2.85    0.19
  12  -1   3    2.92    0.20
 -12   1  -3    2.62    0.18
  12   1   3    2.81    0.17
  12   1   3    2.71    0.21
  13  -1   3    0.37    0.12
 -13  -1  -3    0.55    0.12
  13   1   3    0.54    0.14
  13   1   3    0.61    0.11
  14  -1   3    8.97    0.36
 -14  -1  -3    8.49    0.34
  14   1   3    9.07    0.36
 -15  -1  -3    0.63    0.14
  15  -1   3    0.28    0.14
  15   1   3    0.47    0.15
  16  -1   3    3.37    0.27
 -16  -1  -3    3.59    0.27
  16   1   3    3.89    0.29
  17  -1   3   -0.03    0.14
 -17  -1  -3   -0.10    0.12
  17   1   3   -0.05    0.14
 -18  -1  -3    0.18    0.15
  18  -1   3    0.33    0.17
  18   1   3    0.46    0.18
  19  -1   3    1.00    0.21
  19   1   3    0.19    0.18
  20  -1   3   -0.10    0.18
  20   1   3   -0.32    0.15
  21  -2  -3    1.08    0.28
  21   2  -3    0.94    0.26
  20  -2  -3    0.41    0.22
  20   2  -3    0.39    0.21
  19  -2  -3    0.83    0.22
  19   2  -3    0.73    0.23
  18  -2  -3    0.23    0.18
  18   2  -3    0.05    0.18
  17  -2  -3    0.08    0.16
  17   2  -3   -0.11    0.15
  16  -2  -3    0.21    0.15
 -16  -2   3   -0.07    0.12
  16   2  -3    0.01    0.15
  15  -2  -3    1.77    0.22
 -15  -2   3    1.88    0.21
  15   2  -3    1.59    0.22
 -14  -2   3    1.00    0.17
  14  -2  -3    1.15    0.19
 -14  -2   3    0.87    0.16
  14   2  -3    0.83    0.10
  14   2  -3    0.71    0.16
  13  -2  -3    1.02    0.16
 -13  -2   3    1.12    0.16
 -13  -2   3    1.45    0.17
 -13   2   3    1.24    0.16
  13   2  -3    1.28    0.18
  13   2  -3    1.21    0.11
 -12  -2   3    0.54    0.12
 -12  -2   3    0.64    0.13
  12  -2  -3    0.42    0.13
 -12   2   3    0.46    0.12
  12   2  -3    0.40    0.08
  12   2  -3    0.08    0.11
 -11  -2   3    0.07    0.09
  11  -2  -3    0.09    0.10
 -11  -2   3    0.16    0.10
 -11   2   3   -0.11    0.08
  11   2  -3    0.00    0.06
  11   2  -3    0.08    0.11
  10  -2  -3    3.09    0.20
 -10  -2   3    2.69    0.18
 -10  -2   3    2.98    0.19
 -10   2   3    3.00    0.18
  10   2  -3    2.50    0.14
  10   2  -3    2.80    0.20
  -9  -2   3    0.68    0.10
   9  -2  -3    0.75    0.12
  -9  -2   3    0.60    0.09
   9   2  -3    0.65    0.12
  -9   2   3    0.80    0.11
   9   2  -3    0.73    0.08
  -8  -2   3    1.25    0.12
  -8  -2   3    1.39    0.12
   8  -2  -3    1.12    0.12
  -8   2   3    1.23    0.12
   8   2  -3    1.13    0.12
   7  -2  -3   18.83    0.47
  -7  -2   3   17.81    0.46
  -7  -2   3   18.31    0.45
   7   2  -3   18.57    0.48
  -7   2   3   18.86    0.46
   6  -2  -3   69.51    1.43
  -6  -2   3   71.02    1.42
  -6  -2   3   70.87    1.43
  -6   2   3   72.00    1.43
   6   2  -3   69.22    1.43
  -6   2   3   71.86    1.34
  -5  -2   3    0.83    0.08
   5  -2  -3    0.82    0.10
  -5  -2   3    0.90    0.10
   5   2  -3    0.66    0.09
  -5   2   3    0.87    0.10
  -5   2   3    0.82    0.06
  -4  -2   3    1.75    0.11
   4  -2  -3    1.45    0.11
   4  -2  -3    1.48    0.08
  -4  -2   3    1.40    0.10
  -4   2   3    1.32    0.11
   4   2  -3    1.24    0.11
  -4   2   3    1.38    0.08
  -3  -2   3   21.46    0.48
   3  -2  -3   20.94    0.48
   3  -2  -3   21.33    0.44
   3   2  -3   21.53    0.47
   3   2  -3   21.07    0.48
  -3   2   3   20.92    0.44
   2  -2  -3   10.59    0.27
   2  -2  -3   10.18    0.25
  -2  -2   3    9.29    0.25
  -2  -2   3   10.32    0.26
   2   2  -3   10.19    0.26
   2   2  -3   10.41    0.27
  -2   2   3   10.41    0.25
   1  -2  -3    2.76    0.12
  -1  -2   3    2.62    0.11
  -1  -2   3    2.79    0.12
  -1  -2   3    2.63    0.12
   1  -2  -3    2.94    0.14
   1   2  -3    2.85    0.13
  -1   2   3    2.87    0.13
   1   2  -3    2.58    0.11
   0  -2   3   63.68    1.26
   0  -2   3   65.32    1.25
   0  -2  -3   62.65    1.26
   0  -2  -3   65.49    1.26
   0  -2   3   63.34    1.25
   0   2  -3   64.99    1.25
   0   2   3   63.41    1.26
   0   2  -3   63.94    1.24
   0   2   3   65.04    1.26
   0   2  -3   64.56    1.26
   1  -2   3   41.86    0.86
  -1  -2  -3   42.70    0.84
   1  -2   3   42.36    0.83
   1  -2   3   41.83    0.84
   1   2   3   42.49    0.86
  -1   2  -3   43.35    0.89
   1   2   3   42.33    0.85
  -1   2  -3   42.19    0.83
   1   2   3   41.41    0.85
  -1   2  -3   41.41    0.82
  -2  -2  -3    7.21    0.19
   2  -2   3    7.16    0.22
   2  -2   3    7.31    0.19
   2   2   3    7.12    0.21
   2   2   3    7.27    0.20
  -2   2  -3    7.03    0.17
   2   2   3    7.01    0.20
  -3  -2  -3   15.05    0.34
   3  -2   3   14.51    0.33
   3  -2   3   14.31    0.37
   3   2   3   15.27    0.37
  -3   2  -3   15.16    0.34
   3   2   3   15.14    0.32
   3   2   3   14.48    0.34
  -3   2  -3   14.60    0.32
   3   2   3   14.60    0.34
  -3   2  -3   14.51    0.31
  -4  -2  -3   29.06    0.61
  -4  -2  -3   29.60    0.64
   4  -2   3   28.74    0.60
  -4   2  -3   29.00    0.61
   4   2   3   28.80    0.60
   4   2   3   28.81    0.62
  -4   2  -3   29.56    0.59
   4   2   3   29.19    0.62
   4   2   3   29.89    0.64
  -5  -2  -3    1.64    0.10
   5  -2   3    1.77    0.11
  -5  -2  -3    1.71    0.10
  -5   2  -3    1.75    0.11
  -5   2  -3    1.66    0.08
   5   2   3    1.94    0.13
   5   2   3    1.60    0.11
   5   2   3    1.62    0.12
  -6  -2  -3    1.11    0.09
   6  -2   3    1.02    0.09
  -6   2  -3    0.98    0.08
   6   2   3    0.95    0.10
   6   2   3    1.04    0.11
   6   2   3    1.00    0.09
  -6   2  -3    0.98    0.09
  -7  -2  -3    5.12    0.18
   7  -2   3    4.49    0.18
  -7  -2  -3    4.51    0.17
   7   2   3    4.81    0.18
  -7   2  -3    4.60    0.16
   7   2   3    4.80    0.19
  -7   2  -3    4.51    0.16
   7   2   3    4.56    0.19
  -8  -2  -3    0.02    0.05
   8  -2   3   -0.04    0.06
  -8  -2  -3   -0.01    0.06
   8   2   3    0.11    0.07
   8   2   3   -0.03    0.06
  -8   2  -3   -0.02    0.05
   8   2   3    0.08    0.07
   9  -2   3    0.12    0.07
  -9  -2  -3    0.19    0.07
  -9  -2  -3    0.09    0.07
   9   2   3    0.22    0.09
   9   2   3    0.17    0.08
  -9   2  -3    0.23    0.06
 -10  -2  -3    4.42    0.18
  10  -2   3    4.33    0.23
 -10  -2  -3    4.82    0.21
  10  -2   3    4.28    0.20
 -10   2  -3    4.11    0.16
  10   2   3    4.48    0.21
  10   2   3    3.95    0.22
 -11  -2  -3    5.45    0.24
  11  -2   3    5.79    0.25
  11   2   3    5.52    0.24
 -11   2  -3    5.52    0.20
  11   2   3    5.37    0.26
  12  -2   3    4.88    0.24
 -12  -2  -3    4.99    0.25
  12   2   3    4.85    0.25
  12   2   3    5.12    0.24
 -13  -2  -3    0.31    0.11
  13  -2   3    0.14    0.12
  13   2   3    0.25    0.10
  13   2   3    0.41    0.14
  14  -2   3    0.36    0.14
 -14  -2  -3    0.14    0.11
  14   2   3    0.19    0.10
  14   2   3    0.32    0.14
  15  -2   3    0.74    0.16
 -15  -2  -3    0.30    0.13
  15   2   3    0.48    0.15
  16  -2   3    0.45    0.16
 -16  -2  -3    0.38    0.14
  16   2   3    0.33    0.16
 -17  -2  -3    0.94    0.18
  17  -2   3    1.14    0.20
  17   2   3    1.07    0.19
 -18  -2  -3    2.82    0.26
  18  -2   3    3.15    0.29
  18   2   3    2.53    0.27
  19  -2   3    0.93    0.22
 -19  -2  -3    0.84    0.20
  19   2   3    0.62    0.20
  20  -2   3    0.02    0.18
  20   2   3    0.21    0.18
  21  -3  -3   -0.01    0.22
  21   3  -3    0.25    0.22
  20  -3  -3    2.66    0.32
  20   3  -3    2.23    0.31
  19  -3  -3   -0.05    0.18
  19   3  -3    0.23    0.20
  18  -3  -3    0.50    0.20
  18   3  -3    0.72    0.21
 -17  -3   3    0.56    0.16
  17  -3  -3    0.69    0.21
  17   3  -3    0.94    0.20
 -16  -3   3    1.50    0.21
  16  -3  -3    1.48    0.22
  16   3  -3    1.65    0.23
  15  -3  -3    6.68    0.36
 -15  -3   3    6.36    0.34
  15   3  -3    6.56    0.37
  15   3  -3    6.92    0.29
  14  -3  -3    0.03    0.14
 -14  -3   3   -0.02    0.14
 -14  -3   3    0.04    0.11
  14   3  -3    0.00    0.14
  14   3  -3    0.27    0.10
  13  -3  -3    0.06    0.13
 -13  -3   3   -0.05    0.11
 -13  -3   3   -0.02    0.11
  13   3  -3   -0.10    0.12
 -13   3   3   -0.15    0.11
  13   3  -3    0.04    0.08
 -12  -3   3    1.68    0.17
  12  -3  -3    1.68    0.19
 -12  -3   3    2.08    0.20
  12   3  -3    1.74    0.15
  12   3  -3    1.38    0.18
 -12   3   3    1.87    0.18
 -11  -3   3   23.16    0.61
  11  -3  -3   23.85    0.63
 -11  -3   3   22.93    0.61
 -11   3   3   24.15    0.61
  11   3  -3   22.96    0.63
  11   3  -3   23.73    0.57
 -10  -3   3    0.06    0.07
 -10  -3   3    0.11    0.10
  10  -3  -3    0.15    0.10
  10   3  -3   -0.03    0.07
  10   3  -3    0.00    0.09
 -10   3   3    0.08    0.09
  -9  -3   3    8.07    0.29
  -9  -3   3    7.93    0.30
   9  -3  -3    8.34    0.31
  -9   3   3    8.37    0.29
   9   3  -3    8.13    0.30
   9   3  -3    8.71    0.27
  -8  -3   3    0.26    0.08
   8  -3  -3    0.30    0.10
  -8  -3   3    0.19    0.09
  -8   3   3    0.28    0.10
   8   3  -3    0.09    0.08
  -8   3   3    0.26    0.03
   7  -3  -3    0.57    0.11
  -7  -3   3    0.67    0.10
  -7  -3   3    0.67    0.10
   7   3  -3    0.46    0.10
  -7   3   3    0.54    0.10
  -7   3   3    0.52    0.05
   6  -3  -3   50.97    1.08
  -6  -3   3   51.29    1.06
  -6  -3   3   51.62    1.08
  -6   3   3   51.46    1.00
  -6   3   3   49.85    1.07
   6   3  -3   49.43    1.08
  -5  -3   3   32.20    0.70
   5  -3  -3   31.29    0.72
  -5  -3   3   32.53    0.72
   5   3  -3   33.35    0.73
  -5   3   3   31.53    0.65
   4  -3  -3   55.00    1.12
  -4  -3   3   55.39    1.11
  -4  -3   3   53.52    1.12
   4   3  -3   53.83    1.13
  -4   3   3   54.62    1.08
   3  -3  -3   92.60    1.85
  -3  -3   3   93.70    1.85
   3   3  -3   94.31    1.84
  -3   3   3   95.88    1.82
   3   3  -3   93.86    1.85
  -2  -3   3   37.00    0.74
   2  -3  -3   36.76    0.76
  -2  -3   3   37.49    0.76
   2  -3  -3   36.94    0.78
  -2  -3   3   36.05    0.78
  -2   3   3   37.00    0.76
   2   3  -3   36.22    0.76
   2   3  -3   36.82    0.78
  -1  -3   3   22.01    0.47
   1  -3  -3   21.82    0.49
   1  -3  -3   21.83    0.48
  -1  -3   3   21.06    0.49
  -1  -3   3   20.78    0.49
  -1   3   3   21.38    0.49
  -1   3   3   21.72    0.48
   1   3  -3   21.82    0.49
   1   3  -3   21.90    0.47
   0  -3   3   22.02    0.49
   0  -3   3   21.46    0.48
   0  -3  -3   20.76    0.49
   0   3   3   21.83    0.49
   0   3  -3   22.12    0.47
   0   3   3   22.34    0.50
   0   3  -3   22.01    0.48
   1  -3   3    4.08    0.17
   1  -3   3    4.25    0.16
   1  -3   3    4.53    0.17
  -1  -3  -3    4.05    0.16
  -1   3  -3    4.08    0.14
   1   3   3    4.11    0.17
   1   3   3    4.18    0.17
  -1   3  -3    4.19    0.15
   2  -3   3    9.76    0.26
   2  -3   3    9.92    0.26
   2  -3   3    9.78    0.29
  -2  -3  -3   10.01    0.27
   2   3   3    9.97    0.28
   2   3   3    9.90    0.29
   3  -3   3   12.32    0.31
  -3  -3  -3   12.28    0.32
   3  -3   3   12.56    0.31
   3   3   3   12.76    0.34
   3   3   3   11.89    0.32
   3   3   3   12.39    0.27
   4  -3   3    0.24    0.07
  -4  -3  -3    0.26    0.07
   4  -3   3    0.20    0.07
   4   3   3    0.36    0.09
   4   3   3    0.20    0.04
   4   3   3    0.18    0.08
   5  -3   3    3.35    0.15
  -5  -3  -3    2.98    0.15
   5   3   3    3.04    0.16
  -5   3  -3    3.10    0.13
  -5   3  -3    3.24    0.14
   5   3   3    3.23    0.17
   6  -3   3   31.64    0.69
  -6  -3  -3   31.81    0.69
  -6   3  -3   31.41    0.66
   6   3   3   31.34    0.71
  -6   3  -3   30.98    0.67
   6   3   3   31.30    0.71
  -7  -3  -3    0.80    0.10
   7  -3   3    0.66    0.10
  -7  -3  -3    0.61    0.09
  -7   3  -3    0.82    0.08
   7   3   3    0.68    0.11
   7   3   3    0.83    0.11
  -7   3  -3    0.66    0.08
   8  -3   3   26.64    0.62
  -8  -3  -3   27.23    0.62
  -8  -3  -3   26.64    0.62
  -8   3  -3   26.33    0.59
   8   3   3   26.83    0.64
  -8   3  -3   26.92    0.58
   8   3   3   27.59    0.64
  -9  -3  -3    0.00    0.07
  -9  -3  -3   -0.02    0.07
   9  -3   3   -0.04    0.08
   9   3   3   -0.06    0.08
  -9   3  -3    0.03    0.06
   9   3   3   -0.03    0.09
  -9   3  -3    0.05    0.06
 -10  -3  -3    0.09    0.08
 -10  -3  -3    0.10    0.08
  10  -3   3   -0.02    0.08
  10   3   3    0.01    0.09
 -10   3  -3   -0.01    0.06
  10   3   3   -0.01    0.09
 -11  -3  -3   12.40    0.39
  11  -3   3   12.38    0.39
  11   3   3   12.69    0.39
  11   3   3   12.02    0.41
 -12  -3  -3    0.03    0.10
  12  -3   3    0.12    0.11
  12   3   3   -0.01    0.12
  12   3   3    0.07    0.10
  13  -3   3    5.92    0.29
 -13  -3  -3    5.40    0.28
  13   3   3    5.72    0.27
  13   3   3    5.65    0.31
  14  -3   3    0.59    0.14
 -14  -3  -3    0.27    0.12
  14   3   3    0.14    0.11
  14   3   3    0.37    0.15
 -15  -3  -3    0.36    0.13
  15  -3   3    0.69    0.17
  15   3   3    0.57    0.17
  16  -3   3    1.08    0.19
 -16  -3  -3    1.40    0.20
  16   3   3    1.82    0.23
  17  -3   3    0.80    0.19
 -17  -3  -3    0.58    0.16
  17   3   3    0.32    0.17
  18  -3   3    0.22    0.18
 -18  -3  -3    0.35    0.16
  18   3   3    0.06    0.17
 -19  -3  -3    0.12    0.16
  19  -3   3    0.03    0.17
  19   3   3   -0.09    0.17
  20  -3   3    1.13    0.25
  20   3   3    1.38    0.25
  21  -4  -3   -0.12    0.21
  21   4  -3   -0.09    0.21
  20  -4  -3    0.11    0.21
  20   4  -3    0.31    0.23
  19  -4  -3    2.64    0.32
  19   4  -3    3.13    0.34
  18  -4  -3    1.48    0.26
  18   4  -3    1.28    0.25
  17  -4  -3   -0.15    0.16
  17   4  -3    0.06    0.17
  16  -4  -3    0.23    0.17
 -16  -4   3    0.44    0.16
  16   4  -3    0.29    0.17
  15  -4  -3    0.08    0.14
 -15  -4   3    0.07    0.13
  15   4  -3   -0.07    0.10
  15   4  -3    0.13    0.16
 -14  -4   3    0.10    0.12
  14  -4  -3   -0.10    0.13
  14   4  -3    0.01    0.10
  14   4  -3   -0.02    0.14
 -13  -4   3   10.06    0.40
 -13  -4   3   10.14    0.40
  13  -4  -3   10.43    0.42
  13   4  -3   10.62    0.43
  13   4  -3   10.18    0.35
 -13   4   3   10.53    0.53
  12  -4  -3   13.28    0.47
 -12  -4   3   13.68    0.45
 -12  -4   3   12.86    0.45
  12   4  -3   13.68    0.41
  12   4  -3   13.14    0.47
 -12   4   3   13.40    0.44
 -11  -4   3    0.49    0.14
  11  -4  -3    0.25    0.13
 -11  -4   3    0.30    0.10
  11   4  -3    0.50    0.14
 -11   4   3    0.48    0.12
  11   4  -3    0.44    0.12
 -10  -4   3    1.90    0.18
  10  -4  -3    2.05    0.20
 -10  -4   3    2.34    0.19
  10   4  -3    1.92    0.16
  10   4  -3    1.69    0.18
 -10   4   3    2.15    0.18
  -9  -4   3    8.00    0.31
  -9  -4   3    7.60    0.29
   9  -4  -3    7.27    0.29
   9   4  -3    7.76    0.32
  -9   4   3    7.57    0.19
  -9   4   3    7.53    0.29
   9   4  -3    7.07    0.27
  -8  -4   3    0.13    0.09
  -8  -4   3    0.03    0.08
   8  -4  -3    0.08    0.09
   8   4  -3    0.12    0.10
  -8   4   3    0.12    0.05
  -8   4   3    0.07    0.09
  -7  -4   3   15.04    0.42
  -7  -4   3   14.96    0.43
   7  -4  -3   14.85    0.43
  -7   4   3   15.10    0.35
   7   4  -3   14.88    0.44
  -7   4   3   14.65    0.42
   6  -4  -3   12.58    0.37
  -6  -4   3   12.10    0.37
  -6  -4   3   13.21    0.36
   6   4  -3   12.54    0.38
  -6   4   3   12.36    0.31
  -5  -4   3    0.82    0.10
   5  -4  -3    0.72    0.11
  -5  -4   3    0.89    0.12
  -5   4   3    0.69    0.08
   5   4  -3    0.89    0.13
  -4  -4   3    1.38    0.08
  -4  -4   3    1.06    0.10
   4  -4  -3    1.51    0.14
  -4  -4   3    1.12    0.12
   4   4  -3    1.35    0.13
  -4   4   3    1.37    0.11
  -3  -4   3    2.64    0.11
  -3  -4   3    2.83    0.16
   3  -4  -3    2.64    0.16
   3   4  -3    2.71    0.17
   3   4  -3    2.77    0.15
  -3   4   3    2.60    0.15
  -2  -4   3   27.61    0.64
  -2  -4   3   28.47    0.60
  -2  -4   3   28.61    0.62
   2  -4  -3   27.88    0.64
  -2   4   3   28.86    0.63
   2   4  -3   28.41    0.64
  -1  -4   3    0.39    0.08
  -1  -4   3    0.34    0.07
   1  -4  -3    0.40    0.09
  -1   4   3    0.55    0.10
   1   4  -3    0.49    0.09
  -1   4   3    0.40    0.09
   0  -4   3   66.11    1.32
   0  -4   3   66.96    1.35
   0  -4  -3   66.92    1.35
   0   4  -3   67.22    1.34
   0   4   3   65.47    1.34
   0   4   3   64.94    1.35
   1  -4   3    2.27    0.15
  -1  -4  -3    2.31    0.14
   1   4   3    2.62    0.15
  -1   4  -3    2.06    0.14
   1   4   3    2.39    0.17
   2  -4   3   11.89    0.33
  -2  -4  -3   10.94    0.32
  -2   4  -3   11.33    0.31
   2   4   3   11.98    0.34
   2   4   3   11.57    0.33
  -3  -4  -3    7.19    0.25
   3  -4   3    7.71    0.25
   3   4   3    7.73    0.27
   3   4   3    7.76    0.26
  -4  -4  -3    4.04    0.18
   4  -4   3    4.23    0.18
   4   4   3    4.12    0.10
   4   4   3    4.13    0.20
   4   4   3    4.20    0.20
   5  -4   3    4.03    0.19
  -5  -4  -3    3.84    0.18
   5   4   3    4.00    0.20
   5   4   3    3.61    0.19
  -6  -4  -3    2.18    0.15
   6  -4   3    2.49    0.16
  -6   4  -3    2.31    0.13
   6   4   3    2.36    0.17
   6   4   3    2.21    0.17
  -7  -4  -3    1.73    0.15
   7  -4   3    2.10    0.15
  -7  -4  -3    1.93    0.14
   7   4   3    1.95    0.17
   7   4   3    1.86    0.16
  -7   4  -3    1.70    0.12
  -8  -4  -3    3.62    0.20
  -8  -4  -3    3.72    0.19
   8  -4   3    3.78    0.20
  -8   4  -3    3.90    0.17
   8   4   3    3.98    0.22
   8   4   3    3.90    0.22
  -9  -4  -3    4.24    0.21
  -9  -4  -3    4.33    0.22
   9  -4   3    4.23    0.23
  -9   4  -3    4.37    0.20
   9   4   3    4.37    0.24
   9   4   3    4.12    0.23
  10  -4   3    4.92    0.25
 -10  -4  -3    5.03    0.25
  10   4   3    5.00    0.26
  10   4   3    5.15    0.27
 -11  -4  -3    0.41    0.11
  11  -4   3    0.55    0.13
  11   4   3    0.62    0.14
  11   4   3    0.38    0.14
  12  -4   3    1.67    0.18
 -12  -4  -3    1.76    0.18
  12   4   3    1.63    0.18
  12   4   3    1.77    0.20
 -13  -4  -3    0.11    0.11
  13  -4   3   -0.12    0.12
  13   4   3   -0.30    0.11
  13   4   3   -0.06    0.11
  14  -4   3    0.05    0.13
 -14  -4  -3    0.24    0.12
  14   4   3    0.15    0.12
  14   4   3    0.01    0.14
 -15  -4  -3    0.07    0.12
  15  -4   3    0.14    0.14
  15   4   3    0.14    0.15
  15   4   3    0.24    0.14
 -16  -4  -3    1.81    0.21
  16  -4   3    1.46    0.22
  16   4   3    1.47    0.23
 -17  -4  -3   -0.09    0.14
  17  -4   3   -0.07    0.16
  17   4   3    0.01    0.17
 -18  -4  -3    1.99    0.25
  18  -4   3    2.32    0.27
  18   4   3    2.12    0.27
 -19  -4  -3    0.88    0.20
  19  -4   3    0.53    0.20
  19   4   3    0.62    0.22
  20  -5  -3    0.02    0.22
  20   5  -3   -0.14    0.21
  19  -5  -3   -0.22    0.19
  19   5  -3    0.13    0.21
  18  -5  -3    1.01    0.23
  18   5  -3    0.87    0.24
  17  -5  -3    0.08    0.18
  17   5  -3   -0.02    0.19
  16  -5  -3    0.05    0.16
  16   5  -3    0.27    0.17
 -15  -5   3    0.22    0.15
  15  -5  -3    0.01    0.15
  15   5  -3    0.20    0.13
  15   5  -3    0.20    0.15
  14  -5  -3    6.48    0.36
 -14  -5   3    6.37    0.34
  14   5  -3    5.42    0.36
  14   5  -3    5.57    0.29
 -13  -5   3    0.01    0.13
  13  -5  -3    0.00    0.14
 -13  -5   3   -0.03    0.10
  13   5  -3    0.24    0.12
  13   5  -3    0.10    0.14
  12  -5  -3    0.09    0.13
 -12  -5   3    0.09    0.12
 -12  -5   3    0.06    0.11
  12   5  -3    0.00    0.11
  12   5  -3    0.25    0.16
 -12   5   3   -0.02    0.11
 -11  -5   3    0.88    0.17
  11  -5  -3    0.90    0.17
 -11  -5   3    0.59    0.13
 -11   5   3    0.67    0.06
  11   5  -3    0.62    0.16
  11   5  -3    0.81    0.14
 -11   5   3    0.53    0.14
 -10  -5   3    4.76    0.26
  10  -5  -3    5.57    0.30
 -10  -5   3    5.44    0.29
 -10   5   3    5.35    0.28
  10   5  -3    4.69    0.27
 -10   5   3    4.78    0.16
  10   5  -3    4.67    0.25
  -9  -5   3   17.54    0.50
   9  -5  -3   17.16    0.51
  -9  -5   3   18.10    0.53
  -9   5   3   17.29    0.40
   9   5  -3   17.34    0.52
  -9   5   3   17.70    0.51
   9   5  -3   18.31    0.50
   8  -5  -3    2.15    0.19
  -8  -5   3    2.31    0.20
  -8  -5   3    2.45    0.19
   8   5  -3    2.67    0.22
  -8   5   3    2.34    0.13
  -8   5   3    2.62    0.20
   7  -5  -3   10.84    0.37
  -7  -5   3   10.33    0.35
  -7  -5   3   11.02    0.38
   7   5  -3   10.69    0.38
  -7   5   3   10.88    0.30
  -6  -5   3    5.97    0.24
  -6  -5   3    6.05    0.27
  -6  -5   3    5.57    0.15
   6  -5  -3    5.48    0.25
  -6   5   3    5.54    0.21
   6   5  -3    6.09    0.27
   5  -5  -3   -0.11    0.09
  -5  -5   3   -0.04    0.08
  -5  -5   3   -0.05    0.04
  -5  -5   3    0.01    0.06
   5   5  -3    0.11    0.09
  -5   5   3    0.01    0.07
  -4  -5   3    0.06    0.10
  -4  -5   3    0.22    0.05
   4  -5  -3    0.13    0.09
  -4  -5   3    0.12    0.07
  -4   5   3    0.20    0.08
   4   5  -3    0.08    0.09
  -3  -5   3   52.59    1.15
   3  -5  -3   54.08    1.16
  -3  -5   3   54.11    1.07
   3   5  -3   52.67    1.15
  -3   5   3   55.65    1.13
  -2  -5   3   11.88    0.30
  -2  -5   3   11.56    0.33
  -2  -5   3   11.51    0.36
   2  -5  -3   12.34    0.36
  -2   5   3   11.77    0.34
  -2   5   3   11.51    0.36
   2   5  -3   12.44    0.36
  -1  -5   3    6.18    0.24
   1  -5  -3    5.95    0.25
  -1   5   3    6.32    0.24
   1   5  -3    6.05    0.24
  -1   5   3    6.66    0.26
   0  -5  -3   36.97    0.82
   0  -5   3   35.84    0.81
   0   5   3   36.43    0.83
   0   5  -3   36.99    0.81
   0   5   3   36.34    0.82
  -1  -5  -3   69.40    1.42
   1  -5   3   68.55    1.41
   1   5   3   67.71    1.42
  -1   5  -3   68.84    1.40
   1   5   3   67.89    1.42
  -2  -5  -3   20.62    0.52
   2  -5   3   21.42    0.53
   2   5   3   20.33    0.53
  -2   5  -3   20.80    0.51
   2   5   3   20.60    0.54
   3  -5   3    3.18    0.19
  -3  -5  -3    2.97    0.18
   3   5   3    3.29    0.20
   3   5   3    3.28    0.20
  -4  -5  -3    6.60    0.26
   4  -5   3    7.13    0.26
   4   5   3    6.78    0.27
   4   5   3    6.34    0.26
  -5  -5  -3    0.99    0.12
   5  -5   3    1.26    0.13
   5   5   3    0.80    0.12
   5   5   3    0.82    0.12
   6  -5   3    8.49    0.30
  -6  -5  -3    7.92    0.29
   6   5   3    8.26    0.31
   6   5   3    7.91    0.31
   7  -5   3    0.06    0.09
  -7  -5  -3   -0.03    0.08
  -7  -5  -3   -0.04    0.08
  -7   5  -3   -0.07    0.06
   7   5   3   -0.02    0.09
   7   5   3   -0.17    0.09
  -8  -5  -3    2.45    0.19
   8  -5   3    2.41    0.20
  -8  -5  -3    2.30    0.18
   8   5   3    1.99    0.19
   8   5   3    2.37    0.20
  -8   5  -3    2.10    0.15
  -9  -5  -3    1.97    0.17
  -9  -5  -3    2.17    0.18
   9  -5   3    1.78    0.18
   9   5   3    1.94    0.19
   9   5   3    2.00    0.20
  10  -5   3    0.51    0.13
 -10  -5  -3    0.59    0.13
  10   5   3    0.39    0.15
  10   5   3    0.29    0.13
  11  -5   3    0.69    0.15
 -11  -5  -3    0.89    0.15
  11   5   3    0.63    0.15
  11   5   3    0.77    0.16
  12  -5   3   -0.13    0.12
 -12  -5  -3   -0.12    0.10
  12   5   3    0.05    0.13
  12   5   3   -0.13    0.11
 -13  -5  -3    0.25    0.13
  13  -5   3    0.30    0.14
  13   5   3    0.28    0.16
  13   5   3    0.20    0.13
  14  -5   3    1.74    0.21
 -14  -5  -3    1.95    0.21
  14   5   3    2.00    0.21
  14   5   3    2.34    0.25
 -15  -5  -3    7.00    0.36
  15  -5   3    6.67    0.37
  15   5   3    7.14    0.36
  15   5   3    7.51    0.39
 -16  -5  -3    0.71    0.18
  16  -5   3    0.94    0.20
  16   5   3    0.53    0.19
  17  -5   3    0.01    0.17
 -17  -5  -3    0.07    0.15
  17   5   3    0.03    0.19
 -18  -5  -3    0.08    0.17
  18  -5   3    0.15    0.18
  18   5   3   -0.33    0.18
 -19  -5  -3    0.19    0.20
  19  -5   3   -0.05    0.19
  19   5   3    0.19    0.21
  20  -6  -3    0.91    0.28
  20   6  -3    1.23    0.30
  19  -6  -3    4.57    0.40
  19   6  -3    5.24    0.45
  18  -6  -3    0.06    0.20
  18   6  -3    0.42    0.22
  17  -6  -3    0.07    0.19
  17   6  -3    0.33    0.21
  16  -6  -3    0.11    0.18
  16   6  -3    0.01    0.18
  16   6  -3   -0.06    0.15
  15  -6  -3    0.08    0.17
  15   6  -3    0.29    0.18
  15   6  -3    0.11    0.13
  14  -6  -3    0.60    0.19
  14   6  -3    0.35    0.14
  14   6  -3    0.44    0.19
 -13  -6   3    0.97    0.23
 -13  -6   3    0.98    0.18
  13  -6  -3    0.80    0.19
  13   6  -3    1.13    0.21
  13   6  -3    0.96    0.16
 -12  -6   3    3.43    0.27
 -12  -6   3    3.57    0.27
  12  -6  -3    3.11    0.27
  12   6  -3    3.64    0.31
  12   6  -3    3.24    0.25
  11  -6  -3    4.01    0.29
 -11  -6   3    3.98    0.27
 -11  -6   3    4.13    0.28
  11   6  -3    4.47    0.27
 -11   6   3    3.81    0.16
  11   6  -3    4.37    0.32
 -11   6   3    3.99    0.27
  10  -6  -3    1.42    0.20
 -10  -6   3    1.45    0.18
 -10  -6   3    1.76    0.18
 -10   6   3    1.36    0.18
  10   6  -3    1.83    0.22
  10   6  -3    1.88    0.20
 -10   6   3    1.44    0.12
   9  -6  -3   11.20    0.42
  -9  -6   3   11.10    0.39
  -9  -6   3   10.66    0.41
   9   6  -3   11.48    0.43
  -9   6   3   10.91    0.39
   9   6  -3   10.84    0.39
  -9   6   3   10.58    0.31
  -8  -6   3    0.63    0.14
  -8  -6   3    0.47    0.11
   8  -6  -3    0.50    0.14
  -8   6   3    0.67    0.10
   8   6  -3    0.61    0.15
  -7  -6   3    3.23    0.21
   7  -6  -3    3.15    0.24
  -7  -6   3    3.28    0.24
   7   6  -3    2.98    0.23
  -7   6   3    3.12    0.18
  -6  -6   3   38.23    0.88
  -6  -6   3   38.11    0.91
   6  -6  -3   37.68    0.91
  -6   6   3   39.56    0.85
   6   6  -3   38.27    0.91
  -5  -6   3   -0.02    0.09
  -5  -6   3    0.07    0.08
   5  -6  -3    0.01    0.10
   5   6  -3   -0.02    0.10
  -5   6   3   -0.05    0.08
  -4  -6   3    5.15    0.25
   4  -6  -3    5.33    0.26
  -4  -6   3    5.26    0.23
  -4   6   3    5.44    0.23
   4   6  -3    5.15    0.26
   3  -6  -3    1.96    0.17
  -3  -6   3    1.60    0.17
   3   6  -3    2.16    0.19
  -3   6   3    2.37    0.18
   2  -6  -3   15.32    0.46
  -2  -6   3   15.32    0.42
  -2  -6   3   16.00    0.46
  -2   6   3   16.06    0.47
   2   6  -3   15.17    0.45
  -2   6   3   16.14    0.44
  -1  -6   3    1.59    0.16
   1  -6  -3    1.63    0.16
  -1   6   3    1.54    0.16
   1   6  -3    1.40    0.15
  -1   6   3    1.55    0.15
   0  -6   3    0.01    0.08
   0  -6  -3   -0.08    0.10
   0   6   3    0.07    0.09
   0   6  -3    0.11    0.09
   0   6   3    0.02    0.10
  -1  -6  -3    3.20    0.19
   1  -6   3    3.15    0.21
   1   6   3    3.23    0.20
   1   6   3    2.96    0.21
  -1   6  -3    2.94    0.18
  -2  -6  -3   11.94    0.38
   2  -6   3   12.05    0.38
   2   6   3   11.83    0.39
  -2   6  -3   12.19    0.37
   2   6   3   12.48    0.40
   3  -6   3    7.76    0.30
  -3  -6  -3    8.86    0.32
   3   6   3    8.72    0.33
   3   6   3    8.29    0.32
  -4  -6  -3    0.71    0.12
   4  -6   3    0.86    0.13
   4   6   3    0.67    0.13
   4   6   3    0.65    0.14
  -5  -6  -3    2.51    0.20
   5  -6   3    3.23    0.22
   5   6   3    3.09    0.22
   5   6   3    3.23    0.23
   6  -6   3    0.42    0.12
  -6  -6  -3    0.52    0.12
   6   6   3    0.39    0.13
   6   6   3    0.37    0.13
   7  -6   3    2.38    0.21
  -7  -6  -3    2.32    0.20
  -7  -6  -3    2.41    0.20
   7   6   3    2.56    0.22
   7   6   3    2.04    0.20
  -8  -6  -3    2.34    0.20
  -8  -6  -3    1.70    0.18
   8  -6   3    2.43    0.21
   8   6   3    1.91    0.19
   8   6   3    1.87    0.20
   9  -6   3    0.00    0.13
  -9  -6  -3    0.12    0.11
  -9  -6  -3   -0.15    0.14
   9   6   3   -0.02    0.13
   9   6   3    0.06    0.13
  10  -6   3    4.29    0.28
 -10  -6  -3    5.03    0.28
  10   6   3    3.98    0.28
  10   6   3    3.80    0.28
  11  -6   3    0.33    0.14
 -11  -6  -3    0.35    0.14
  11   6   3    0.29    0.15
  11   6   3    0.39    0.16
 -12  -6  -3   -0.02    0.12
  12  -6   3    0.06    0.13
  12   6   3   -0.20    0.13
  12   6   3   -0.13    0.12
  13  -6   3    0.12    0.15
 -13  -6  -3    0.33    0.14
  13   6   3    0.15    0.16
  13   6   3    0.43    0.15
 -14  -6  -3    0.51    0.16
  14  -6   3    0.92    0.18
  14   6   3    0.84    0.19
  14   6   3    0.59    0.17
 -15  -6  -3    5.50    0.35
  15  -6   3    5.25    0.36
  15   6   3    4.86    0.34
  15   6   3    5.48    0.37
  16  -6   3    0.92    0.21
 -16  -6  -3    1.33    0.22
  16   6   3    1.05    0.23
 -17  -6  -3   -0.24    0.14
  17  -6   3    0.07    0.18
  17   6   3   -0.01    0.18
  18  -6   3    0.32    0.20
  18   6   3    0.16    0.21
  19  -7  -3    0.97    0.28
  19   7  -3    0.58    0.27
  18  -7  -3    0.28    0.23
  18   7  -3    0.33    0.23
  17  -7  -3    0.69    0.24
  17   7  -3    0.37    0.22
  16  -7  -3    2.24    0.28
  16   7  -3    2.34    0.30
  16   7  -3    2.05    0.24
  15  -7  -3    0.44    0.20
  15   7  -3    0.53    0.22
  15   7  -3    0.29    0.16
  14  -7  -3    0.13    0.18
  14   7  -3    0.11    0.19
  14   7  -3    0.36    0.15
  13  -7  -3    0.31    0.18
  13   7  -3    0.28    0.17
  13   7  -3    0.17    0.14
  12  -7  -3    0.65    0.18
 -12  -7   3    0.48    0.17
  12   7  -3    0.51    0.16
  12   7  -3    0.30    0.17
  11  -7  -3    0.07    0.14
 -11  -7   3    0.00    0.15
  11   7  -3   -0.15    0.12
 -11   7   3    0.12    0.14
  11   7  -3    0.02    0.16
  10  -7  -3    0.75    0.18
 -10  -7   3    0.92    0.18
  10   7  -3    0.45    0.16
  10   7  -3    0.74    0.19
 -10   7   3    0.75    0.16
 -10   7   3    0.80    0.12
  -9  -7   3   15.53    0.53
  -9  -7   3   16.05    0.52
   9  -7  -3   17.00    0.56
   9   7  -3   16.25    0.55
   9   7  -3   15.03    0.51
  -9   7   3   16.63    0.44
  -9   7   3   16.24    0.52
   8  -7  -3    1.82    0.21
  -8  -7   3    1.92    0.22
  -8  -7   3    1.83    0.18
  -8   7   3    1.94    0.16
   8   7  -3    2.11    0.22
   7  -7  -3   27.86    0.75
  -7  -7   3   26.68    0.74
  -7  -7   3   27.54    0.72
   7   7  -3   27.66    0.75
  -7   7   3   28.63    0.67
  -6  -7   3    0.80    0.14
   6  -7  -3    0.39    0.14
  -6  -7   3    0.59    0.16
  -6   7   3    0.59    0.13
   5  -7  -3    0.15    0.12
  -5  -7   3    0.17    0.13
  -5  -7   3    0.25    0.11
   5   7  -3   -0.02    0.13
  -5   7   3    0.26    0.11
  -4  -7   3    0.09    0.07
   4  -7  -3    0.04    0.11
  -4  -7   3    0.09    0.11
  -4   7   3    0.11    0.10
   4   7  -3    0.00    0.12
  -3  -7   3    0.29    0.08
   3  -7  -3    0.45    0.14
  -3  -7   3    0.43    0.14
   3   7  -3    0.40    0.12
  -3   7   3    0.42    0.12
   2  -7  -3    1.83    0.18
  -2  -7   3    2.39    0.19
  -2  -7   3    1.72    0.18
   2   7  -3    2.04    0.18
  -2   7   3    2.23    0.18
  -2   7   3    2.16    0.21
  -1  -7   3    0.81    0.14
   1  -7  -3    0.74    0.15
  -1   7   3    0.74    0.14
  -1   7   3    0.91    0.14
   1   7  -3    0.66    0.13
   0  -7  -3    0.32    0.13
   0  -7   3    0.24    0.11
   0   7  -3    0.39    0.12
   0   7   3    0.32    0.13
   0   7   3    0.22    0.12
  -1  -7  -3   12.14    0.41
   1  -7   3   12.44    0.42
  -1   7  -3   11.93    0.39
   1   7   3   11.87    0.42
   1   7   3   12.80    0.42
   2  -7   3    2.63    0.22
  -2  -7  -3    2.39    0.20
  -2   7  -3    2.41    0.19
   2   7   3    2.59    0.21
   2   7   3    2.28    0.21
   3  -7   3    6.17    0.29
  -3  -7  -3    6.08    0.29
   3   7   3    5.71    0.15
   3   7   3    5.78    0.30
   3   7   3    6.50    0.31
   4  -7   3    1.00    0.16
  -4  -7  -3    1.42    0.18
   4   7   3    1.37    0.18
   4   7   3    1.33    0.18
   5  -7   3    0.89    0.15
  -5  -7  -3    1.51    0.18
   5   7   3    1.03    0.16
   5   7   3    1.21    0.18
   6  -7   3    8.61    0.35
  -6  -7  -3    8.12    0.35
  -6  -7  -3    8.29    0.34
   6   7   3    7.48    0.36
   6   7   3    8.42    0.37
   7  -7   3   -0.05    0.12
  -7  -7  -3    0.16    0.11
  -7  -7  -3    0.19    0.12
   7   7   3    0.13    0.14
   7   7   3    0.17    0.13
  -8  -7  -3    3.13    0.25
   8  -7   3    3.65    0.27
  -8  -7  -3    3.35    0.25
   8   7   3    3.35    0.28
   8   7   3    2.98    0.26
  -9  -7  -3    9.08    0.38
   9  -7   3    8.61    0.39
   9   7   3    9.29    0.41
   9   7   3    9.42    0.41
  10  -7   3    0.02    0.14
 -10  -7  -3    0.04    0.12
  10   7   3    0.02    0.15
  10   7   3    0.03    0.13
 -11  -7  -3    0.59    0.15
  11  -7   3    0.63    0.17
  11   7   3    0.86    0.18
  11   7   3    0.45    0.18
  12  -7   3    0.59    0.18
 -12  -7  -3    0.49    0.16
  12   7   3    0.55    0.17
  12   7   3    0.21    0.17
  13  -7   3    0.99    0.20
 -13  -7  -3    0.76    0.17
  13   7   3    0.58    0.20
  13   7   3    1.06    0.20
 -14  -7  -3    0.49    0.16
  14  -7   3    0.52    0.19
  14   7   3    0.04    0.18
  14   7   3    0.04    0.16
 -15  -7  -3   -0.22    0.14
  15  -7   3    0.18    0.18
  15   7   3   -0.02    0.18
  15   7   3    0.10    0.16
  16  -7   3    1.16    0.24
  16   7   3    1.02    0.25
  17  -7   3    2.62    0.30
  17   7   3    2.78    0.34
  18  -8  -3    3.55    0.39
  18   8  -3    3.25    0.39
  17  -8  -3    1.85    0.31
  17   8  -3    1.81    0.31
  16  -8  -3   -0.13    0.19
  16   8  -3   -0.05    0.21
  16   8  -3    0.00    0.16
  15  -8  -3    1.30    0.26
  15   8  -3    1.22    0.21
  15   8  -3    1.44    0.26
  14  -8  -3    1.20    0.25
  14   8  -3    1.02    0.24
  14   8  -3    1.16    0.21
  13  -8  -3    0.41    0.19
  13   8  -3    0.09    0.15
  13   8  -3    0.26    0.20
 -12  -8   3    0.08    0.17
  12  -8  -3    0.27    0.19
  12   8  -3    0.45    0.20
  12   8  -3    0.33    0.16
  11  -8  -3    3.17    0.30
 -11  -8   3    2.80    0.29
  11   8  -3    2.83    0.27
  11   8  -3    2.31    0.27
 -10  -8   3    0.21    0.17
  10  -8  -3    0.33    0.17
 -10   8   3    0.07    0.14
  10   8  -3    0.57    0.17
  10   8  -3    0.39    0.17
 -10   8   3    0.14    0.11
  -9  -8   3    0.51    0.18
   9  -8  -3    0.42    0.18
   9   8  -3    0.49    0.19
   9   8  -3    0.59    0.18
  -9   8   3    0.44    0.12
   8  -8  -3    3.14    0.27
  -8  -8   3    2.60    0.25
   8   8  -3    3.09    0.27
   8   8  -3    2.92    0.28
  -8   8   3    3.05    0.22
  -7  -8   3    1.31    0.21
   7  -8  -3    1.79    0.24
   7   8  -3    1.89    0.24
  -7   8   3    1.54    0.18
  -6  -8   3    0.54    0.16
   6  -8  -3    0.51    0.16
  -6   8   3    0.51    0.14
   6   8  -3    0.42    0.16
   5  -8  -3   45.10    1.08
  -5  -8   3   43.06    1.06
  -5   8   3   44.16    1.01
   5   8  -3   42.72    1.06
   4  -8  -3    1.42    0.20
  -4  -8   3    1.41    0.21
   4   8  -3    1.21    0.20
  -4   8   3    1.05    0.16
   3  -8  -3   12.87    0.47
  -3  -8   3   12.48    0.45
   3   8  -3   13.28    0.46
  -3   8   3   12.54    0.42
  -2  -8   3   12.07    0.44
   2  -8  -3   12.21    0.46
  -2   8   3   12.83    0.44
   2   8  -3   13.37    0.46
  -2   8   3   12.51    0.46
  -1  -8   3   -0.03    0.13
   1  -8  -3    0.02    0.12
   1   8  -3   -0.01    0.11
  -1   8   3    0.12    0.13
  -1   8   3    0.22    0.14
   0  -8   3    3.75    0.27
   0  -8  -3    3.83    0.28
   0   8   3    3.70    0.27
   0   8   3    3.90    0.28
   0   8  -3    3.61    0.26
   1  -8   3    0.66    0.16
  -1  -8  -3    0.75    0.16
  -1   8  -3    0.63    0.15
   1   8   3    0.46    0.16
   1   8   3    0.39    0.14
   2  -8   3    8.48    0.37
  -2  -8  -3    8.26    0.37
   2   8   3    8.50    0.36
   2   8   3    7.64    0.36
  -2   8  -3    8.36    0.35
  -3  -8  -3    6.76    0.34
   3  -8   3    6.48    0.34
   3   8   3    7.40    0.35
   3   8   3    6.40    0.33
  -4  -8  -3    0.54    0.16
   4  -8   3    0.50    0.15
   4   8   3    0.60    0.17
   4   8   3    0.87    0.19
  -5  -8  -3    6.95    0.33
  -5  -8  -3    6.58    0.34
   5  -8   3    5.79    0.31
   5   8   3    5.93    0.35
   5   8   3    6.75    0.36
  -6  -8  -3    1.39    0.19
  -6  -8  -3    1.35    0.19
   6  -8   3    1.33    0.20
   6   8   3    1.16    0.19
   6   8   3    1.30    0.21
   7  -8   3    2.43    0.23
  -7  -8  -3    2.63    0.25
  -7  -8  -3    2.20    0.22
   7   8   3    2.21    0.23
   7   8   3    2.26    0.23
   8  -8   3   10.03    0.42
  -8  -8  -3    9.86    0.41
   8   8   3    9.85    0.44
   8   8   3    9.64    0.44
   9  -8   3    0.40    0.17
  -9  -8  -3    0.68    0.16
   9   8   3    0.70    0.19
   9   8   3    0.81    0.19
 -10  -8  -3    0.05    0.13
  10  -8   3    0.44    0.17
  10   8   3    0.31    0.18
  10   8   3    0.18    0.14
  11  -8   3    0.48    0.19
 -11  -8  -3    0.58    0.17
  11   8   3    0.29    0.18
  11   8   3    0.61    0.20
  12  -8   3   -0.05    0.16
 -12  -8  -3    0.11    0.14
  12   8   3   -0.06    0.15
  12   8   3   -0.12    0.17
  13  -8   3   -0.08    0.16
  13   8   3    0.14    0.18
  13   8   3   -0.02    0.16
  14  -8   3    0.35    0.20
  14   8   3    0.24    0.18
  14   8   3   -0.02    0.19
  15  -8   3    0.48    0.22
  15   8   3    0.20    0.22
  15   8   3    0.21    0.18
  16  -8   3    0.93    0.23
  16   8   3    0.61    0.25
  17  -9  -3    0.15    0.25
  17   9  -3   -0.29    0.23
  16  -9  -3    0.15    0.23
  16   9  -3   -0.12    0.22
  16   9  -3    0.03    0.17
  15  -9  -3   -0.03    0.21
  15   9  -3    0.62    0.20
  15   9  -3    0.37    0.25
  14  -9  -3   -0.01    0.21
  14   9  -3    0.04    0.19
  14   9  -3    0.12    0.18
  13  -9  -3   -0.10    0.19
  13   9  -3   -0.25    0.19
  13   9  -3   -0.06    0.15
  12  -9  -3    0.57    0.21
  12   9  -3    0.76    0.21
  12   9  -3    0.97    0.25
  11  -9  -3    1.61    0.25
 -11  -9   3    1.83    0.26
  11   9  -3    1.56    0.24
  11   9  -3    1.47    0.25
  10  -9  -3   -0.01    0.18
 -10  -9   3   -0.19    0.16
  10   9  -3    0.05    0.17
  10   9  -3    0.24    0.16
   9  -9  -3    1.88    0.26
  -9  -9   3    1.48    0.23
   9   9  -3    1.57    0.23
  -9   9   3    1.22    0.17
   9   9  -3    2.01    0.28
   8  -9  -3   -0.03    0.15
  -8  -9   3    0.11    0.17
  -8   9   3   -0.02    0.11
   8   9  -3    0.03    0.15
   8   9  -3    0.26    0.19
   7  -9  -3    2.31    0.25
  -7  -9   3    2.29    0.27
   7   9  -3    1.63    0.22
  -7   9   3    2.23    0.21
   7   9  -3    2.06    0.25
   6  -9  -3    1.01    0.20
  -6  -9   3    1.04    0.20
  -6   9   3    1.16    0.17
   6   9  -3    1.35    0.21
  -5  -9   3    0.75    0.18
   5  -9  -3    0.66    0.19
  -5   9   3    0.88    0.16
   5   9  -3    1.05    0.21
  -4  -9   3   28.96    0.81
   4  -9  -3   28.80    0.81
  -4   9   3   27.98    0.75
   4   9  -3   27.57    0.79
   3  -9  -3   -0.13    0.13
  -3  -9   3   -0.14    0.16
   3   9  -3   -0.11    0.15
  -3   9   3   -0.02    0.12
  -2  -9   3    1.50    0.21
   2  -9  -3    1.47    0.21
   2   9  -3    1.29    0.19
  -2   9   3    1.69    0.22
   1  -9  -3   23.69    0.69
  -1  -9   3   23.31    0.70
   1   9  -3   23.24    0.68
  -1   9   3   23.35    0.67
  -1   9   3   23.33    0.69
   0  -9   3   -0.20    0.13
   0  -9  -3   -0.04    0.15
   0   9  -3    0.05    0.14
   0   9   3    0.06    0.13
   0   9   3   -0.04    0.16
  -1  -9  -3   13.10    0.48
   1  -9   3   13.06    0.49
   1   9   3   13.12    0.49
  -1   9  -3   13.43    0.48
   1   9   3   13.33    0.49
  -2  -9  -3    1.24    0.19
   2  -9   3    1.31    0.19
  -2   9  -3    1.79    0.22
   2   9   3    1.37    0.23
   2   9   3    1.66    0.22
  -3  -9  -3    0.14    0.15
   3  -9   3   -0.09    0.14
   3   9   3    0.08    0.16
   3   9   3    0.00    0.14
   4  -9   3    0.03    0.15
  -4  -9  -3    0.24    0.14
   4   9   3    0.11    0.14
   4   9   3    0.26    0.15
   5  -9   3   -0.03    0.15
  -5  -9  -3    0.15    0.15
   5   9   3    0.39    0.19
   5   9   3   -0.04    0.16
  -6  -9  -3    0.34    0.16
   6  -9   3    0.13    0.15
   6   9   3    0.14    0.17
   6   9   3    0.38    0.18
  -7  -9  -3    3.22    0.32
   7  -9   3    2.94    0.27
   7   9   3    2.65    0.27
   7   9   3    2.19    0.25
   8  -9   3    1.02    0.20
   8   9   3    0.85    0.20
   8   9   3    0.88    0.21
   9  -9   3    0.10    0.17
   9   9   3    0.10    0.14
   9   9   3    0.05    0.17
  10  -9   3    2.77    0.28
  10   9   3    2.84    0.31
  10   9   3    2.61    0.27
  11  -9   3    1.79    0.25
  11   9   3    1.67    0.25
  11   9   3    1.30    0.25
  12  -9   3    0.88    0.23
  12   9   3    0.50    0.20
  12   9   3    1.11    0.25
  13  -9   3    0.05    0.20
  13   9   3    0.29    0.22
  13   9   3    0.34    0.19
  14  -9   3    0.12    0.20
  14   9   3    0.30    0.19
  14   9   3    0.27    0.23
  15  -9   3    1.23    0.26
  15   9   3    0.69    0.26
  15   9   3    0.82    0.22
  16 -10  -3    1.95    0.33
  16  10  -3    1.86    0.34
  16  10  -3    1.81    0.28
  15 -10  -3    2.04    0.33
  15  10  -3    1.88    0.34
  15  10  -3    2.12    0.28
  14 -10  -3    1.00    0.27
  14  10  -3    1.08    0.29
  14  10  -3    0.93    0.24
  13 -10  -3   -0.07    0.20
  13  10  -3    0.15    0.23
  13  10  -3   -0.04    0.18
  12 -10  -3    0.45    0.22
  12  10  -3    0.34    0.21
  12  10  -3    0.21    0.19
  11 -10  -3    0.12    0.18
  11  10  -3    0.19    0.23
  11  10  -3   -0.09    0.16
  10 -10  -3    0.07    0.18
 -10 -10   3    0.15    0.18
  10  10  -3    0.14    0.19
  10  10  -3   -0.33    0.19
  -9 -10   3    0.14    0.17
   9 -10  -3    0.15    0.20
  -9  10   3    0.12    0.13
   9  10  -3    0.07    0.19
   9  10  -3    0.02    0.19
   8 -10  -3    5.83    0.41
  -8 -10   3    6.27    0.41
   8  10  -3    6.23    0.43
   8  10  -3    6.48    0.41
  -8  10   3    6.15    0.33
  -7 -10   3   -0.10    0.18
   7 -10  -3    0.34    0.20
   7  10  -3    0.20    0.20
   7  10  -3    0.17    0.16
  -7  10   3    0.12    0.14
  -6 -10   3    3.09    0.31
   6 -10  -3    3.35    0.32
   6  10  -3    3.92    0.34
   6  10  -3    4.17    0.36
  -6  10   3    3.02    0.26
   5 -10  -3    3.10    0.30
  -5 -10   3    3.70    0.33
  -5  10   3    2.87    0.27
   5  10  -3    3.25    0.32
   4 -10  -3    0.96    0.22
  -4 -10   3    0.62    0.20
  -4  10   3    0.84    0.18
   4  10  -3    1.16    0.24
   3 -10  -3    0.22    0.19
  -3 -10   3    0.88    0.22
   3  10  -3    0.74    0.20
  -3  10   3    0.37    0.17
  -2 -10   3    3.25    0.31
   2 -10  -3    3.13    0.29
   2  10  -3    2.88    0.28
  -2  10   3    2.98    0.27
   1 -10  -3    1.04    0.22
  -1 -10   3    0.86    0.21
  -1  10   3    0.81    0.19
  -1  10   3    1.00    0.20
   1  10  -3    0.79    0.20
   0 -10  -3    5.36    0.34
   0 -10   3    5.61    0.37
   0  10  -3    5.10    0.34
   0  10   3    5.25    0.34
   0  10   3    4.94    0.35
   1 -10   3    5.60    0.37
  -1 -10  -3    5.99    0.38
  -1  10  -3    6.19    0.36
   1  10   3    6.45    0.39
   1  10   3    5.07    0.35
   2 -10   3    0.39    0.19
  -2 -10  -3    0.80    0.21
   2  10   3    0.83    0.21
  -2  10  -3    0.56    0.17
   2  10   3    0.43    0.18
  -3 -10  -3    2.56    0.28
   3 -10   3    1.59    0.25
   3  10   3    2.09    0.25
   3  10   3    2.10    0.27
  -4 -10  -3    0.17    0.17
   4 -10   3   -0.12    0.16
   4  10   3    0.25    0.19
   4  10   3    0.05    0.17
  -5 -10  -3    0.33    0.16
   5 -10   3    0.15    0.17
   5  10   3    0.10    0.18
   5  10   3    0.42    0.17
  -6 -10  -3    0.62    0.19
   6 -10   3    0.80    0.20
   6  10   3    1.00    0.23
   6  10   3    0.69    0.21
   7 -10   3   -0.02    0.16
   7  10   3   -0.15    0.17
   7  10   3   -0.22    0.16
   8 -10   3    0.54    0.20
   8  10   3    0.36    0.21
   8  10   3    0.12    0.18
   9 -10   3    1.37    0.25
   9  10   3    0.96    0.24
   9  10   3    1.08    0.24
  10 -10   3    0.32    0.19
  10  10   3   -0.10    0.15
  10  10   3    0.11    0.20
  11 -10   3    0.11    0.20
  11  10   3    0.24    0.20
  11  10   3    0.02    0.18
  12 -10   3    0.00    0.21
  12  10   3    0.10    0.21
  12  10   3    0.13    0.18
  13 -10   3    0.60    0.23
  13  10   3    0.14    0.20
  13  10   3    0.12    0.21
  14 -10   3   -0.07    0.21
  14  10   3    0.36    0.24
  14  10   3    0.30    0.20
  14 -11  -3    2.14    0.35
  14  11  -3    1.65    0.29
  14  11  -3    2.47    0.35
  13 -11  -3    2.57    0.36
  13  11  -3    2.61    0.33
  13  11  -3    3.56    0.41
  12 -11  -3   -0.33    0.21
  12  11  -3    0.54    0.26
  12  11  -3    0.11    0.18
  11 -11  -3    0.42    0.22
  11  11  -3    0.74    0.26
  11  11  -3    0.04    0.20
 -10 -11   3    0.46    0.34
  10 -11  -3    0.07    0.23
  10  11  -3    0.10    0.20
  10  11  -3    0.26    0.21
   9 -11  -3    1.16    0.26
  -9 -11   3    1.28    0.27
   9  11  -3    1.47    0.25
   9  11  -3    2.07    0.30
   8 -11  -3    1.30    0.28
  -8 -11   3    1.24    0.24
   8  11  -3    1.17    0.27
  -8  11   3    1.05    0.20
   8  11  -3    1.43    0.28
  -7 -11   3    0.21    0.20
   7 -11  -3    0.43    0.22
   7  11  -3    0.17    0.21
   7  11  -3    0.40    0.19
  -7  11   3    0.22    0.16
  -6 -11   3    0.58    0.20
   6 -11  -3    0.59    0.20
   6  11  -3    0.27    0.21
   6  11  -3    0.99    0.23
  -6  11   3    0.75    0.19
   5 -11  -3    1.53    0.25
  -5 -11   3    1.05    0.24
   5  11  -3    1.43    0.26
   5  11  -3    0.87    0.21
  -5  11   3    0.62    0.19
  -4 -11   3    0.61    0.22
   4 -11  -3    0.39    0.21
   4  11  -3    0.29    0.21
   4  11  -3    0.21    0.20
  -4  11   3    0.19    0.16
   3 -11  -3   -0.14    0.19
  -3 -11   3    0.00    0.18
   3  11  -3   -0.17    0.17
  -3  11   3   -0.01    0.16
   2 -11  -3    0.04    0.19
  -2 -11   3    0.54    0.21
  -2  11   3    0.29    0.18
   2  11  -3    0.32    0.19
   1 -11  -3    0.67    0.22
  -1 -11   3    0.08    0.19
   1  11  -3    0.15    0.16
  -1  11   3    0.18    0.17
  -1  11   3    0.22    0.20
   0 -11   3    0.28    0.18
   0 -11  -3   -0.19    0.18
   0  11  -3    0.33    0.17
   0  11   3   -0.04    0.14
   0  11   3    0.06    0.17
  -1 -11  -3    0.08    0.18
   1 -11   3   -0.07    0.17
   1  11   3   -0.13    0.15
  -1  11  -3   -0.03    0.16
   1  11   3    0.03    0.18
  -2 -11  -3    0.31    0.20
   2 -11   3    0.04    0.19
   2  11   3    0.22    0.20
   2  11   3    0.68    0.21
   3 -11   3   -0.24    0.17
  -3 -11  -3   -0.30    0.16
   3  11   3    0.19    0.20
   3  11   3   -0.23    0.17
   4 -11   3   -0.15    0.15
  -4 -11  -3   -0.04    0.15
   4  11   3    0.06    0.19
   4  11   3   -0.18    0.18
  -5 -11  -3    0.64    0.22
   5 -11   3    0.75    0.21
   5  11   3    0.81    0.23
   5  11   3    0.57    0.22
   6 -11   3   -0.03    0.18
   6  11   3    0.02    0.17
   6  11   3    0.25    0.22
   7 -11   3    0.09    0.20
   7  11   3    0.26    0.22
   7  11   3    0.05    0.17
   8 -11   3    0.51    0.22
   8  11   3    0.28    0.22
   8  11   3    0.50    0.20
   9 -11   3   -0.12    0.20
   9  11   3    0.07    0.18
   9  11   3   -0.06    0.18
  10 -11   3    0.76    0.24
  10  11   3    0.37    0.22
  10  11   3    0.65    0.26
  11 -11   3    0.70    0.24
  11  11   3    0.03    0.21
  11  11   3    0.20    0.20
  12 -11   3    0.46    0.24
  12  11   3    0.72    0.26
  12  11   3    0.65    0.22
  12 -12  -3   -0.02    0.25
  12  12  -3    0.24    0.24
  12  12  -3    0.39    0.22
  11 -12  -3    1.07    0.30
  11  12  -3    1.57    0.33
  11  12  -3    1.47    0.27
  10 -12  -3    0.99    0.30
  10  12  -3    0.22    0.25
  10  12  -3    0.74    0.25
  -9 -12   3    0.80    0.32
   9 -12  -3    1.09    0.30
   9  12  -3    1.22    0.30
   9  12  -3    0.89    0.26
   8 -12  -3    2.54    0.35
  -8 -12   3    2.58    0.34
   8  12  -3    2.08    0.32
   8  12  -3    2.52    0.35
   7 -12  -3    0.12    0.24
  -7 -12   3    0.12    0.21
   7  12  -3    0.25    0.24
   7  12  -3    0.03    0.21
  -7  12   3    0.15    0.17
   6 -12  -3    1.12    0.29
  -6 -12   3    1.11    0.25
   6  12  -3    1.25    0.27
   6  12  -3    1.10    0.28
  -6  12   3    1.34    0.23
   5 -12  -3    2.18    0.31
  -5 -12   3    1.64    0.30
   5  12  -3    1.33    0.25
   5  12  -3    2.13    0.30
  -5  12   3    1.23    0.23
  -4 -12   3    0.34    0.20
   4 -12  -3    1.25    0.28
   4  12  -3    0.46    0.22
  -4  12   3    0.36    0.19
   4  12  -3    0.46    0.23
   3 -12  -3    1.07    0.26
  -3 -12   3    0.56    0.21
   3  12  -3    0.69    0.24
  -3  12   3    0.62    0.20
   3  12  -3    0.33    0.22
  -2 -12   3    0.25    0.22
   2 -12  -3    0.21    0.22
   2  12  -3    0.22    0.18
   2  12  -3    0.23    0.19
  -2  12   3    0.15    0.17
   1 -12  -3   -0.13    0.20
  -1 -12   3   -0.06    0.21
   1  12  -3   -0.10    0.19
   1  12  -3    0.21    0.19
  -1  12   3    0.10    0.18
   0 -12   3    1.08    0.27
   0 -12  -3    0.87    0.23
   0  12   3    1.24    0.23
   0  12  -3    1.36    0.26
   0  12   3    1.54    0.28
   1 -12   3    0.84    0.26
  -1 -12  -3    0.89    0.25
   1  12   3    0.92    0.22
   1  12   3    1.03    0.26
   2 -12   3    0.12    0.22
  -2 -12  -3    0.00    0.20
   2  12   3    0.01    0.21
   2  12   3    0.03    0.20
  -3 -12  -3    0.66    0.21
   3 -12   3    0.82    0.25
   3  12   3    0.46    0.21
   3  12   3    0.89    0.26
   4 -12   3    0.13    0.21
  -4 -12  -3    0.33    0.33
   4  12   3    0.06    0.20
   4  12   3    0.26    0.21
   5 -12   3    1.86    0.29
   5  12   3    2.19    0.32
   5  12   3    2.28    0.31
   6 -12   3   -0.05    0.21
   6  12   3    0.20    0.20
   6  12   3    0.09    0.19
   7 -12   3    1.31    0.28
  -7  12  -3    1.85    0.26
   7  12   3    1.15    0.29
   7  12   3    1.29    0.27
   8 -12   3   -0.12    0.21
   8  12   3    0.04    0.20
   8  12   3    0.41    0.24
   9 -12   3   -0.02    0.22
   9  12   3    0.07    0.22
   9  12   3   -0.07    0.21
  10 -12   3    0.28    0.23
  10  12   3    0.19    0.25
  10  12   3    0.09    0.23
   9 -13  -3    0.12    0.27
   9  13  -3    0.12    0.25
  -8 -13   3   -0.28    0.35
   8 -13  -3    0.05    0.25
   8  13  -3   -0.01    0.24
   8  13  -3    0.07    0.25
  -7 -13   3    0.29    0.26
   7 -13  -3    0.08    0.23
   7  13  -3   -0.10    0.22
  -7  13   3    0.29    0.21
   7  13  -3    0.18    0.24
   6 -13  -3    0.60    0.28
  -6 -13   3    0.04    0.24
   6  13  -3    0.32    0.24
  -6  13   3    0.34    0.21
   6  13  -3   -0.53    0.20
   5 -13  -3    0.93    0.29
  -5 -13   3    0.88    0.27
  -5  13   3    1.07    0.24
   5  13  -3    0.85    0.25
   5  13  -3    0.75    0.24
   4 -13  -3   -0.16    0.20
  -4 -13   3   -0.10    0.24
   4  13  -3   -0.05    0.21
   4  13  -3    0.09    0.23
  -4  13   3    0.05    0.20
   3 -13  -3    0.35    0.23
  -3 -13   3    0.71    0.27
   3  13  -3    0.30    0.22
   3  13  -3    0.15    0.20
  -3  13   3    0.17    0.21
  -2 -13   3   -0.03    0.23
   2 -13  -3    0.18    0.24
   2  13  -3   -0.10    0.21
  -2  13   3    0.21    0.22
  -1 -13   3    0.01    0.23
   1 -13  -3   -0.05    0.21
   1  13  -3   -0.04    0.18
  -1  13   3    0.23    0.22
   0 -13  -3   -0.10    0.22
   0 -13   3    0.08    0.24
   0  13  -3    0.17    0.19
   0  13   3    0.19    0.21
  -1 -13  -3   -0.48    0.20
   1 -13   3   -0.25    0.22
   1  13   3   -0.14    0.20
   1  13   3   -0.21    0.22
  -1  13  -3   -0.15    0.20
  -2 -13  -3   -0.21    0.21
   2 -13   3    0.30    0.24
   2  13   3    0.29    0.26
   2  13   3   -0.06    0.20
  -2  13  -3   -0.05    0.20
   3 -13   3   -0.06    0.23
  -3  13  -3    0.12    0.20
   3  13   3    0.18    0.22
   3  13   3   -0.01    0.20
   4 -13   3    0.01    0.23
  -4  13  -3    0.14    0.20
   4  13   3    0.17    0.24
   4  13   3   -0.23    0.21
   5 -13   3    1.18    0.30
   5  13   3    1.01    0.28
  -5  13  -3    0.98    0.24
   5  13   3    1.00    0.28
   6 -13   3    0.39    0.26
  -6  13  -3    0.27    0.19
   6  13   3    0.19    0.23
   6  13   3    0.17    0.24
   7 -13   3    2.98    0.38
   7  13   3    1.14    0.31
   8 -13   3    0.45    0.27
   8  13   3    0.02    0.25
   5 -14  -3    0.08    0.26
  -5 -14   3    0.57    0.26
  -5  14   3   -0.35    0.18
  -4 -14   3   -0.17    0.25
   4 -14  -3    0.23    0.25
  -4  14   3   -0.03    0.21
   3 -14  -3    0.17    0.27
  -3 -14   3    0.46    0.27
  -3  14   3    0.52    0.24
  -2 -14   3    0.40    0.25
   2 -14  -3    0.48    0.28
   2  14  -3    0.31    0.25
  -2  14   3    0.56    0.25
   1 -14  -3   -0.08    0.25
  -1 -14   3    0.17    0.27
  -1  14   3    0.04    0.23
   1  14  -3   -0.41    0.21
   0 -14   3    3.80    0.43
   0 -14  -3    3.77    0.42
   0  14   3    3.31    0.36
   0  14  -3    3.46    0.38
  -1 -14  -3    1.48    0.33
   1 -14   3    1.55    0.34
  -1  14  -3    1.41    0.30
   1  14   3    1.38    0.30
   2 -14   3    0.38    0.28
  -2  14  -3    0.22    0.21
   2  14   3    0.71    0.29
   3 -14   3    0.30    0.26
   3  14   3    0.19    0.26
  -3  14  -3    0.21    0.22
   4 -14   3   -0.16    0.25
  -4  14  -3   -0.02    0.21
   4  14   3    0.26    0.27
  22   0  -4    0.64    0.26
  21   0  -4   -0.26    0.21
  20   0  -4    0.10    0.21
  19   0  -4    0.01    0.18
  18   0  -4   -0.15    0.15
  17   0  -4   -0.05    0.15
  16   0  -4    0.01    0.14
  15   0  -4    0.11    0.15
 -14   0   4    0.12    0.12
  14   0  -4    0.20    0.14
  13   0  -4   -0.09    0.12
 -13   0   4   -0.01    0.10
 -12   0   4   36.36    0.85
  12   0  -4   35.38    0.87
 -11   0   4    0.07    0.09
  11   0  -4    0.06    0.10
 -10   0   4   12.51    0.38
  10   0  -4   12.44    0.26
  10   0  -4   12.45    0.39
   9   0  -4    0.04    0.03
   9   0  -4    0.05    0.08
  -9   0   4   -0.01    0.08
  -8   0   4    2.20    0.15
   8   0  -4    2.12    0.17
   7   0  -4    0.06    0.08
  -7   0   4    0.06    0.08
   6   0  -4   69.56    1.30
   6   0  -4   66.02    1.37
  -6   0   4   67.75    1.37
  -5   0   4   -0.08    0.06
   5   0  -4    0.01    0.06
   5   0  -4   -0.08    0.03
   4   0  -4  178.20    3.45
  -4   0   4  180.69    3.45
   4   0  -4  184.74    3.42
   3   0  -4   -0.02    0.05
  -3   0   4    0.10    0.05
  -3   0   4    0.00    0.06
   3   0  -4   -0.03    0.06
   2   0  -4   24.24    0.50
   2   0  -4   24.74    0.51
  -2   0   4   23.66    0.50
  -2   0   4   23.67    0.50
  -2   0   4   24.62    0.51
   1   0  -4   -0.01    0.06
  -1   0   4   -0.02    0.04
  -1   0   4    0.05    0.06
   1   0  -4    0.04    0.04
  -1   0   4    0.00    0.05
   1   0   4   -0.01    0.02
   1   0   4   -0.03    0.06
  -1   0  -4   -0.04    0.05
   1   0   4    0.03    0.02
   2   0   4   16.10    0.37
   2   0   4   15.83    0.37
  -2   0  -4   15.39    0.36
  -3   0  -4   -0.07    0.04
   3   0   4   -0.06    0.06
   3   0   4    0.00    0.02
   3   0   4   -0.01    0.05
   3   0   4   -0.03    0.02
   4   0   4   14.70    0.35
   4   0   4   14.48    0.30
   4   0   4   14.06    0.36
  -4   0  -4   13.97    0.34
   4   0   4   14.48    0.30
   5   0   4   -0.02    0.04
   5   0   4   -0.02    0.06
   5   0   4   -0.04    0.04
  -5   0  -4    0.05    0.06
   5   0   4   -0.06    0.07
   6   0   4    7.84    0.21
   6   0   4    7.96    0.21
   6   0   4    7.87    0.24
  -6   0  -4    7.98    0.24
  -7   0  -4    0.00    0.04
   7   0   4    0.00    0.05
   7   0   4    0.02    0.06
   7   0   4   -0.07    0.04
  -8   0  -4    0.55    0.06
   8   0   4    0.52    0.08
   8   0   4    0.24    0.05
   8   0   4    0.45    0.08
   9   0   4   -0.07    0.06
  -9   0  -4    0.01    0.05
   9   0   4   -0.05    0.06
   9   0   4    0.00    0.02
  10   0   4   17.37    0.44
  10   0   4   17.73    0.45
 -10   0  -4   17.97    0.43
  11   0   4    0.07    0.09
  11   0   4   -0.05    0.07
 -11   0  -4    0.03    0.07
  12   0   4    9.53    0.34
  12   0   4    9.74    0.31
 -12   0  -4   10.53    0.33
  13   0   4   -0.16    0.08
  13   0   4   -0.05    0.10
 -13   0  -4    0.04    0.09
 -14   0  -4    0.42    0.11
  14   0   4    0.20    0.12
  15   0   4    0.07    0.12
 -15   0  -4   -0.03    0.10
 -16   0  -4    0.03    0.12
  16   0   4   -0.03    0.13
  17   0   4    0.09    0.14
  18   0   4    0.41    0.18
  19   0   4   -0.25    0.15
  20   0   4    0.04    0.17
  22  -1  -4   -0.02    0.22
  22   1  -4    0.20    0.23
  21  -1  -4   -0.24    0.19
  21   1  -4    0.01    0.22
  20  -1  -4    0.56    0.23
  20   1  -4    0.39    0.22
  19  -1  -4    0.37    0.20
  19   1  -4    0.58    0.22
  18  -1  -4    0.34    0.19
  18   1  -4    0.64    0.21
  17  -1  -4    1.09    0.22
  17   1  -4    0.90    0.20
  16  -1  -4    2.75    0.27
  16   1  -4    2.99    0.27
  15  -1  -4    0.06    0.14
  15   1  -4    0.34    0.16
 -14  -1   4   10.72    0.39
  14  -1  -4   10.15    0.40
  14   1  -4   10.13    0.40
  14   1  -4   10.57    0.33
 -14   1   4    9.60    0.38
  13  -1  -4    2.14    0.21
 -13  -1   4    2.42    0.21
  13   1  -4    2.32    0.22
 -13   1   4    2.21    0.19
  13   1  -4    2.09    0.11
 -12  -1   4    6.11    0.27
 -12  -1   4    5.55    0.27
  12  -1  -4    5.81    0.29
  12   1  -4    5.94    0.18
 -12   1   4    5.96    0.28
  12   1  -4    5.51    0.28
  11  -1  -4    8.04    0.33
 -11  -1   4    7.75    0.30
 -11  -1   4    8.30    0.30
 -11   1   4    8.00    0.30
  11   1  -4    8.71    0.33
  11   1  -4    8.09    0.22
 -10  -1   4    4.12    0.20
 -10  -1   4    3.70    0.20
  10  -1  -4    4.09    0.22
 -10   1   4    3.98    0.21
  10   1  -4    4.10    0.15
  10   1  -4    3.91    0.21
  -9  -1   4    2.37    0.17
  -9  -1   4    2.58    0.16
   9  -1  -4    2.56    0.17
  -9   1   4    2.31    0.16
   9   1  -4    2.39    0.18
   8  -1  -4  104.17    2.10
  -8  -1   4  104.64    2.08
  -8  -1   4  107.00    2.10
   8   1  -4  106.36    2.11
  -8   1   4  104.98    2.10
  -7  -1   4   30.42    0.69
   7  -1  -4   29.88    0.69
  -7  -1   4   31.64    0.68
   7  -1  -4   30.82    0.59
   7   1  -4   30.55    0.70
  -7   1   4   30.76    0.69
   6  -1  -4   90.43    1.70
  -6  -1   4   91.98    1.77
   6  -1  -4   88.02    1.79
  -6  -1   4   90.46    1.79
  -6   1   4   90.65    1.79
   6   1  -4   88.45    1.79
  -5  -1   4  121.02    2.30
   5  -1  -4  119.74    2.32
  -5  -1   4  118.66    2.31
   5  -1  -4  120.31    2.25
  -5   1   4  119.57    2.25
   5   1  -4  116.48    2.32
  -5   1   4  118.85    2.31
   4  -1  -4  234.11    4.40
  -4  -1   4  208.93    4.39
  -4  -1   4  234.35    4.41
   4  -1  -4  239.54    4.41
   4   1  -4  239.05    4.40
  -4   1   4  238.24    4.42
   4   1  -4  233.74    4.41
  -4   1   4  232.61    4.41
   3  -1  -4  174.91    3.30
   3  -1  -4  174.31    3.33
  -3  -1   4  176.47    3.33
  -3   1   4  175.39    3.30
   3   1  -4  174.27    3.32
  -3   1   4  172.43    3.33
   3   1  -4  178.02    3.33
   2  -1  -4  108.86    2.05
   2  -1  -4  108.50    2.06
  -2  -1   4  108.56    2.08
  -2  -1   4  105.73    2.05
   2   1  -4  106.37    2.04
  -2   1   4  104.12    2.05
   2   1  -4  109.07    2.05
  -1  -1   4    5.21    0.15
   1  -1  -4    5.47    0.15
  -1  -1   4    4.94    0.15
   1  -1  -4    5.03    0.17
   1   1  -4    5.07    0.15
  -1   1   4    5.22    0.17
  -1   1   4    5.40    0.16
   1   1  -4    5.11    0.17
   0  -1  -4   14.71    0.31
   0  -1   4   14.75    0.31
   0  -1  -4   14.76    0.34
   0   1  -4   14.80    0.34
   0   1   4   15.05    0.32
   0   1   4   12.24    0.31
   0   1   4   14.51    0.34
   0   1  -4   14.61    0.30
  -1  -1  -4  195.43    3.76
  -1  -1  -4  200.86    3.72
   1  -1   4  200.91    3.72
   1  -1   4  199.66    3.77
   1  -1   4  201.18    3.74
   1  -1   4  196.10    3.76
   1   1   4  199.10    3.76
   1   1   4  199.54    3.73
  -1   1  -4  192.89    3.76
  -2  -1  -4   11.14    0.23
   2  -1   4   11.57    0.29
   2  -1   4   11.18    0.29
  -2  -1  -4   11.11    0.28
   2  -1   4   11.30    0.23
  -2   1  -4   11.31    0.28
   2   1   4   11.63    0.29
   2   1   4   11.23    0.25
   2   1   4   10.64    0.24
   2   1   4   11.26    0.28
   3  -1   4   58.04    1.19
   3  -1   4   58.27    1.17
  -3  -1  -4   59.62    1.18
   3  -1   4   59.53    1.12
   3   1   4   57.60    1.18
   3   1   4   58.99    1.16
   3   1   4   58.85    1.13
   3   1   4   58.97    1.13
  -3   1  -4   59.05    1.17
   4  -1   4    1.26    0.07
   4  -1   4    1.21    0.10
  -4  -1  -4    1.35    0.10
   4  -1   4    1.23    0.12
   4  -1   4    1.37    0.07
   4   1   4    1.49    0.12
   4   1   4    1.37    0.08
   4   1   4    1.46    0.11
  -4   1  -4    1.39    0.10
   4   1   4    1.39    0.08
   5  -1   4    3.65    0.15
   5  -1   4    3.81    0.12
   5  -1   4    3.63    0.12
  -5  -1  -4    3.72    0.18
   5   1   4    3.51    0.16
   5   1   4    3.76    0.16
   5   1   4    3.52    0.12
  -5   1  -4    3.75    0.15
   5   1   4    3.82    0.13
   6  -1   4   10.60    0.26
   6  -1   4   10.52    0.28
   6  -1   4   10.41    0.26
   6   1   4   10.13    0.29
  -6   1  -4   10.57    0.22
   6   1   4   10.38    0.27
  -6   1  -4   10.14    0.28
   7  -1   4   15.12    0.35
  -7  -1  -4   15.00    0.34
   7  -1   4   14.91    0.35
   7  -1   4   14.97    0.37
   7   1   4   14.87    0.39
   7   1   4   15.19    0.37
  -7   1  -4   15.13    0.33
  -7   1  -4   14.79    0.37
   8  -1   4    0.46    0.08
   8  -1   4    0.46    0.08
  -8  -1  -4    0.43    0.07
   8  -1   4    0.35    0.06
   8   1   4    0.46    0.08
   8   1   4    0.35    0.08
  -8   1  -4    0.45    0.06
   9  -1   4    0.06    0.06
   9  -1   4    0.17    0.07
  -9  -1  -4    0.19    0.06
   9   1   4    0.21    0.08
   9   1   4    0.36    0.07
  -9   1  -4    0.18    0.06
   9   1   4    0.18    0.08
  10  -1   4    1.08    0.12
 -10  -1  -4    1.08    0.11
  10  -1   4    1.22    0.11
  10   1   4    0.92    0.12
  10   1   4    1.05    0.12
  10   1   4    1.36    0.18
 -10   1  -4    1.15    0.10
  11  -1   4    7.11    0.24
  11  -1   4    7.08    0.27
 -11  -1  -4    6.87    0.25
 -11   1  -4    7.18    0.25
  11   1   4    7.39    0.27
  11   1   4    7.16    0.26
 -12  -1  -4   52.01    1.13
  12  -1   4   51.01    1.09
  12  -1   4   53.25    1.15
  12   1   4   53.98    1.13
  12   1   4   53.46    1.15
 -12   1  -4   53.63    1.12
  13  -1   4    0.19    0.11
 -13  -1  -4   -0.08    0.09
  13   1   4    0.07    0.09
 -13   1  -4    0.09    0.09
  13   1   4   -0.08    0.11
 -14  -1  -4    0.14    0.10
  14  -1   4    0.01    0.11
  14   1   4    0.24    0.13
 -15  -1  -4   -0.03    0.10
  15  -1   4   -0.04    0.12
  15   1   4    0.21    0.13
 -16  -1  -4   -0.20    0.10
  16  -1   4    0.13    0.14
  16   1   4    0.13    0.14
  17  -1   4    0.15    0.15
 -17  -1  -4    0.14    0.13
  17   1   4    0.07    0.15
 -18  -1  -4    0.57    0.18
  18  -1   4    0.60    0.18
  18   1   4    0.68    0.18
  19  -1   4    0.01    0.17
  19   1   4    0.25    0.17
  20  -1   4    1.33    0.23
  20   1   4    1.01    0.22
  21  -2  -4    0.17    0.23
  21   2  -4    0.57    0.24
  20  -2  -4    0.39    0.21
  20   2  -4    0.49    0.22
  19  -2  -4    0.98    0.23
  19   2  -4    0.86    0.23
  18  -2  -4   -0.28    0.16
  18   2  -4    0.29    0.19
  17  -2  -4   -0.06    0.16
  17   2  -4    0.26    0.17
  16  -2  -4   -0.02    0.15
  16   2  -4    0.20    0.15
  15  -2  -4    0.14    0.15
 -15  -2   4    0.25    0.13
  15   2  -4    0.09    0.15
  14  -2  -4    0.10    0.14
 -14  -2   4    0.03    0.12
 -14  -2   4    0.16    0.13
  14   2  -4    0.05    0.14
 -14   2   4    0.27    0.12
  14   2  -4    0.05    0.07
 -13  -2   4   10.99    0.39
  13  -2  -4   11.65    0.43
 -13  -2   4   11.40    0.40
 -13   2   4   10.43    0.39
  13   2  -4   10.72    0.42
  13   2  -4   10.87    0.31
 -12  -2   4    0.87    0.15
 -12  -2   4    0.62    0.12
  12  -2  -4    0.68    0.15
  12   2  -4    0.72    0.15
 -12   2   4    0.75    0.13
  12   2  -4    0.83    0.10
 -11  -2   4    2.21    0.19
  11  -2  -4    2.36    0.20
 -11  -2   4    2.19    0.18
 -11   2   4    2.09    0.18
  11   2  -4    2.03    0.20
  11   2  -4    2.20    0.13
 -10  -2   4    2.14    0.17
 -10  -2   4    2.27    0.18
  10  -2  -4    1.76    0.17
  10   2  -4    2.10    0.13
  10   2  -4    2.35    0.19
 -10   2   4    2.16    0.17
  -9  -2   4    2.15    0.17
   9  -2  -4    1.97    0.16
  -9  -2   4    2.02    0.16
  -9   2   4    1.89    0.16
   9   2  -4    2.07    0.17
   8  -2  -4    2.46    0.16
  -8  -2   4    2.51    0.16
  -8  -2   4    2.60    0.16
  -8   2   4    2.41    0.16
   8   2  -4    2.33    0.16
  -7  -2   4   77.93    1.61
  -7  -2   4   82.22    1.60
   7  -2  -4   79.20    1.62
  -7   2   4   80.06    1.61
   7   2  -4   78.14    1.62
  -7   2   4   80.21    1.50
  -6  -2   4    0.45    0.09
   6  -2  -4    0.39    0.04
  -6  -2   4    0.41    0.08
   6  -2  -4    0.28    0.08
   6   2  -4    0.45    0.09
  -6   2   4    0.42    0.05
  -6   2   4    0.43    0.09
   5  -2  -4   42.75    0.84
   5  -2  -4   42.67    0.91
  -5  -2   4   44.43    0.90
  -5  -2   4   43.67    0.91
   5   2  -4   41.47    0.90
  -5   2   4   42.05    0.90
  -5   2   4   43.60    0.84
  -4  -2   4   22.25    0.51
   4  -2  -4   22.71    0.52
   4  -2  -4   22.35    0.47
  -4   2   4   22.53    0.47
   4   2  -4   22.67    0.51
   4   2  -4   22.47    0.50
  -4   2   4   22.11    0.51
  -3  -2   4    4.72    0.16
   3  -2  -4    4.83    0.15
   3  -2  -4    5.06    0.18
  -3  -2   4    5.02    0.18
   3   2  -4    5.13    0.17
   3   2  -4    5.08    0.17
  -3   2   4    5.23    0.16
   2  -2  -4   56.16    1.12
   2  -2  -4   55.44    1.10
  -2  -2   4   57.03    1.10
  -2  -2   4   54.87    1.11
  -2   2   4   54.72    1.10
   2   2  -4   57.20    1.11
   2   2  -4   55.51    1.10
  -1  -2   4   21.36    0.47
   1  -2  -4   21.47    0.47
   1  -2  -4   21.86    0.47
  -1  -2   4   22.14    0.47
  -1  -2   4   21.18    0.47
  -1   2   4   21.40    0.48
   1   2  -4   21.52    0.46
   1   2  -4   21.51    0.45
   0  -2   4   -0.10    0.04
   0  -2   4    0.00    0.06
   0  -2  -4   -0.01    0.05
   0  -2  -4    0.01    0.06
   0  -2   4   -0.08    0.04
   0   2   4   -0.03    0.05
   0   2   4   -0.01    0.06
   0   2  -4   -0.09    0.03
   0   2   4   -0.03    0.05
   0   2  -4    0.03    0.05
  -1  -2  -4    0.26    0.06
  -1  -2  -4    0.20    0.05
   1  -2   4    0.15    0.05
   1  -2   4    0.25    0.07
  -1   2  -4    0.25    0.05
   1   2   4    0.20    0.06
   1   2   4    0.10    0.06
   1   2   4    0.24    0.06
  -1   2  -4    0.23    0.03
  -2  -2  -4    3.56    0.12
   2  -2   4    3.37    0.12
   2  -2   4    3.59    0.16
   2   2   4    3.37    0.16
  -2   2  -4    3.16    0.09
   2   2   4    3.20    0.13
  -2   2  -4    3.48    0.14
   2   2   4    3.30    0.13
   3  -2   4    0.38    0.08
   3  -2   4    0.46    0.06
  -3  -2  -4    0.48    0.06
   3  -2   4    0.52    0.05
  -3   2  -4    0.57    0.07
  -3   2  -4    0.59    0.05
  -3   2  -4    0.47    0.04
   3   2   4    0.63    0.09
   3   2   4    0.56    0.06
   3   2   4    0.39    0.06
   3   2   4    0.48    0.07
   4  -2   4    4.95    0.21
  -4  -2  -4    4.83    0.15
   4  -2   4    5.03    0.15
  -4   2  -4    4.81    0.12
   4   2   4    4.82    0.16
   4   2   4    4.88    0.16
   4   2   4    4.70    0.17
  -4   2  -4    4.82    0.17
   4   2   4    4.90    0.20
  -5  -2  -4    9.91    0.25
   5  -2   4    9.67    0.25
   5   2   4    9.84    0.29
   5   2   4    9.97    0.26
  -5   2  -4    9.72    0.27
   5   2   4    9.87    0.27
   5   2   4    9.62    0.26
  -6  -2  -4   -0.03    0.05
   6  -2   4    0.02    0.05
   6   2   4    0.01    0.06
   6   2   4    0.02    0.07
  -6   2  -4    0.02    0.05
   6   2   4    0.02    0.05
  -7  -2  -4   13.28    0.32
   7  -2   4   13.01    0.33
   7   2   4   12.90    0.37
   7   2   4   12.83    0.34
  -7   2  -4   13.54    0.34
   7   2   4   12.89    0.35
  -8  -2  -4   12.29    0.32
  -8  -2  -4   12.01    0.30
   8  -2   4   12.12    0.32
   8   2   4   11.58    0.34
   8   2   4   12.57    0.35
   8   2   4   11.93    0.33
  -9  -2  -4    2.53    0.20
  -9  -2  -4    2.45    0.15
   9  -2   4    2.48    0.15
   9   2   4    2.31    0.16
   9   2   4    2.70    0.17
   9   2   4    2.55    0.15
 -10  -2  -4    9.13    0.29
  10  -2   4    8.92    0.29
  10   2   4    9.54    0.32
  10   2   4    9.58    0.32
 -11  -2  -4    2.23    0.17
  11  -2   4    2.55    0.19
  11   2   4    2.41    0.19
  11   2   4    2.58    0.19
 -12  -2  -4   -0.07    0.09
  12  -2   4   -0.06    0.10
  12   2   4    0.02    0.11
  12   2   4    0.03    0.09
 -13  -2  -4    0.53    0.12
  13  -2   4    0.59    0.14
  13   2   4    0.54    0.14
  13   2   4    0.68    0.13
  14  -2   4    0.45    0.14
 -14  -2  -4    0.53    0.13
  14   2   4    0.36    0.14
  14   2   4    0.36    0.11
 -15  -2  -4    0.92    0.15
  15  -2   4    1.02    0.17
  15   2   4    0.66    0.16
 -16  -2  -4    1.99    0.21
  16  -2   4    2.17    0.22
  16   2   4    2.17    0.23
  17  -2   4    0.03    0.14
 -17  -2  -4    0.29    0.14
  17   2   4    0.47    0.16
  18  -2   4    1.65    0.22
 -18  -2  -4    1.13    0.20
  18   2   4    1.01    0.21
  19  -2   4    0.89    0.21
 -19  -2  -4    1.22    0.21
  19   2   4    0.83    0.21
  21  -3  -4    0.71    0.26
  21   3  -4    0.50    0.25
  20  -3  -4    0.00    0.20
  20   3  -4    0.05    0.21
  19  -3  -4    1.61    0.26
  19   3  -4    1.81    0.27
  18  -3  -4    1.29    0.24
  18   3  -4    1.24    0.24
 -17  -3   4    1.23    0.24
  17  -3  -4    1.29    0.23
  17   3  -4    1.26    0.24
  16  -3  -4    0.29    0.17
 -16  -3   4   -0.08    0.13
  16   3  -4    0.05    0.15
  15  -3  -4    8.26    0.40
 -15  -3   4    8.46    0.39
  15   3  -4    9.02    0.33
  15   3  -4    8.55    0.41
 -14  -3   4    1.88    0.20
 -14  -3   4    1.58    0.18
  14  -3  -4    1.63    0.21
  14   3  -4    1.82    0.21
  14   3  -4    1.85    0.15
  13  -3  -4    9.38    0.39
 -13  -3   4    9.04    0.37
 -13  -3   4    9.91    0.38
 -13   3   4    9.10    0.37
  13   3  -4   10.15    0.31
  13   3  -4    9.73    0.41
  12  -3  -4   10.56    0.40
 -12  -3   4   11.09    0.38
 -12  -3   4   10.41    0.39
  12   3  -4   10.62    0.33
  12   3  -4   10.80    0.41
 -12   3   4   10.49    0.38
  11  -3  -4    0.34    0.12
 -11  -3   4    0.18    0.11
 -11  -3   4    0.48    0.13
 -11   3   4    0.48    0.12
  11   3  -4    0.39    0.13
  11   3  -4    0.33    0.09
  10  -3  -4   34.00    0.82
 -10  -3   4   34.98    0.81
 -10  -3   4   33.64    0.81
 -10   3   4   33.78    0.81
  10   3  -4   34.62    0.83
  -9  -3   4   24.85    0.62
  -9  -3   4   24.02    0.60
   9  -3  -4   23.67    0.61
  -9   3   4   24.29    0.60
   9   3  -4   24.45    0.63
  -8  -3   4   -0.04    0.06
  -8  -3   4    0.06    0.09
   8  -3  -4    0.18    0.08
  -8   3   4    0.05    0.03
   8   3  -4    0.01    0.09
  -8   3   4   -0.05    0.07
  -7  -3   4    0.41    0.09
   7  -3  -4    0.37    0.09
  -7  -3   4    0.29    0.09
   7   3  -4    0.49    0.10
  -7   3   4    0.30    0.10
  -7   3   4    0.43    0.05
   6  -3  -4    8.97    0.29
  -6  -3   4    9.22    0.28
  -6  -3   4    9.02    0.30
  -6   3   4    9.43    0.23
  -6   3   4    8.90    0.30
   6   3  -4    8.94    0.30
  -5  -3   4    3.48    0.16
   5  -3  -4    3.65    0.18
  -5  -3   4    3.53    0.18
   5   3  -4    3.57    0.18
  -5   3   4    3.68    0.14
   4  -3  -4  107.73    2.07
   4  -3  -4  107.16    2.12
  -4  -3   4  107.43    2.12
   4   3  -4  108.72    2.12
  -4   3   4  108.07    2.07
   4   3  -4  106.79    2.10
  -3  -3   4   19.31    0.44
  -3  -3   4   19.11    0.46
   3  -3  -4   19.73    0.47
   3  -3  -4   19.44    0.44
  -3   3   4   19.34    0.44
   3   3  -4   19.21    0.45
   3   3  -4   19.70    0.46
   2  -3  -4    1.01    0.10
  -2  -3   4    1.11    0.10
   2  -3  -4    1.01    0.09
  -2  -3   4    0.97    0.08
  -2  -3   4    1.03    0.10
   2   3  -4    1.15    0.09
  -2   3   4    1.09    0.10
   2   3  -4    0.74    0.08
   1  -3  -4  105.11    2.06
  -1  -3   4  105.87    2.05
  -1  -3   4  106.41    2.06
   1  -3  -4  106.52    2.06
  -1   3   4  107.39    2.07
   1   3  -4  104.45    2.05
   1   3  -4  107.14    2.04
  -1   3   4  104.33    2.06
   0  -3   4    9.02    0.25
   0  -3  -4    9.42    0.26
   0  -3   4    8.88    0.26
   0  -3  -4    9.90    0.30
   0   3  -4    9.14    0.24
   0   3   4    9.22    0.27
   0   3   4    8.80    0.26
   0   3  -4    9.20    0.25
   1  -3   4    0.16    0.06
   1  -3   4    0.21    0.08
   1  -3   4    0.24    0.06
  -1  -3  -4    0.17    0.07
   1   3   4    0.12    0.07
  -1   3  -4    0.28    0.06
   1   3   4    0.36    0.09
  -1   3  -4    0.32    0.05
   2  -3   4    0.54    0.09
   2  -3   4    0.28    0.06
  -2  -3  -4    0.36    0.07
   2  -3   4    0.43    0.07
  -2   3  -4    0.44    0.05
   2   3   4    0.28    0.08
   2   3   4    0.30    0.07
   3  -3   4   -0.02    0.07
   3  -3   4    0.07    0.06
  -3  -3  -4    0.04    0.06
   3  -3   4    0.05    0.06
   3   3   4   -0.06    0.07
   3   3   4    0.00    0.07
   3   3   4    0.04    0.04
   4  -3   4    6.75    0.20
   4  -3   4    5.90    0.19
  -4  -3  -4    6.47    0.21
   4   3   4    6.40    0.23
   4   3   4    6.58    0.18
   4   3   4    6.58    0.23
  -4   3  -4    6.99    0.24
  -5  -3  -4    1.77    0.12
   5  -3   4    1.76    0.12
   5   3   4    1.77    0.15
  -5   3  -4    1.73    0.09
   5   3   4    1.84    0.14
   5   3   4    1.60    0.10
   5   3   4    1.36    0.13
   6  -3   4    0.81    0.09
  -6  -3  -4    0.84    0.09
   6   3   4    0.84    0.10
   6   3   4    0.67    0.10
  -7  -3  -4   66.18    1.33
   7  -3   4   65.52    1.34
   7   3   4   66.21    1.38
   7   3   4   67.49    1.37
  -8  -3  -4    0.05    0.07
  -8  -3  -4    0.11    0.06
   8  -3   4   -0.08    0.07
   8   3   4   -0.03    0.08
   8   3   4   -0.06    0.08
   9  -3   4    1.03    0.12
  -9  -3  -4    1.07    0.12
  -9  -3  -4    1.31    0.11
   9   3   4    1.12    0.14
   9   3   4    1.17    0.14
  10  -3   4    5.55    0.24
 -10  -3  -4    5.60    0.24
  10   3   4    5.66    0.26
  10   3   4    5.22    0.26
  11  -3   4    2.32    0.19
 -11  -3  -4    2.30    0.19
  11   3   4    2.20    0.19
  11   3   4    2.15    0.18
 -12  -3  -4    0.03    0.10
  12  -3   4    0.37    0.12
  12   3   4    0.17    0.12
  12   3   4    0.32    0.12
 -13  -3  -4   18.24    0.53
  13  -3   4   18.93    0.54
  13   3   4   19.23    0.53
  13   3   4   18.19    0.55
 -14  -3  -4    2.73    0.23
  14  -3   4    2.25    0.21
  14   3   4    2.66    0.23
  14   3   4    2.32    0.20
  15  -3   4   -0.11    0.12
 -15  -3  -4   -0.10    0.11
  15   3   4    0.06    0.13
  16  -3   4    3.54    0.29
 -16  -3  -4    3.51    0.28
  16   3   4    3.24    0.28
 -17  -3  -4    2.09    0.24
  17  -3   4    2.50    0.25
  17   3   4    2.59    0.27
  18  -3   4    0.13    0.16
 -18  -3  -4    0.18    0.15
  18   3   4    0.30    0.18
  19  -3   4    0.00    0.17
 -19  -3  -4   -0.13    0.14
  19   3   4   -0.25    0.16
  21  -4  -4    0.24    0.23
  21   4  -4    0.26    0.24
  20  -4  -4    0.55    0.24
  20   4  -4    0.72    0.25
  19  -4  -4    0.47    0.22
  19   4  -4    0.14    0.21
  18  -4  -4    1.09    0.24
  18   4  -4    1.14    0.25
  17  -4  -4   -0.11    0.16
  17   4  -4    0.27    0.17
  16  -4  -4    0.75    0.19
  16   4  -4    0.88    0.21
 -15  -4   4    0.26    0.13
  15  -4  -4    0.47    0.17
  15   4  -4    0.16    0.11
  15   4  -4    0.08    0.16
 -14  -4   4    0.43    0.15
  14  -4  -4    0.42    0.17
 -14  -4   4    0.06    0.12
  14   4  -4    0.30    0.11
  14   4  -4    0.19    0.16
 -13  -4   4    0.70    0.16
 -13  -4   4    0.38    0.13
  13  -4  -4    0.58    0.17
  13   4  -4    0.42    0.12
  13   4  -4    0.31    0.14
 -13   4   4    0.54    0.14
  12  -4  -4    1.21    0.18
 -12  -4   4    1.29    0.18
 -12  -4   4    1.39    0.17
 -12   4   4    0.91    0.15
  12   4  -4    0.97    0.14
  12   4  -4    1.48    0.20
 -11  -4   4    3.17    0.22
  11  -4  -4    2.79    0.24
 -11  -4   4    2.56    0.22
  11   4  -4    2.62    0.22
  11   4  -4    2.41    0.18
 -11   4   4    2.86    0.21
  10  -4  -4    0.73    0.13
 -10  -4   4    0.75    0.12
 -10  -4   4    0.85    0.14
  10   4  -4    0.73    0.15
 -10   4   4    0.91    0.14
   9  -4  -4    3.66    0.22
  -9  -4   4    4.05    0.22
  -9  -4   4    3.80    0.22
  -9   4   4    4.32    0.13
  -9   4   4    3.93    0.23
   9   4  -4    4.03    0.23
  -8  -4   4    2.01    0.16
   8  -4  -4    2.09    0.17
  -8  -4   4    2.17    0.18
   8   4  -4    1.80    0.17
  -8   4   4    2.12    0.16
  -8   4   4    1.77    0.10
  -7  -4   4    4.63    0.21
  -7  -4   4    4.92    0.23
   7  -4  -4    4.75    0.24
  -7   4   4    5.16    0.23
   7   4  -4    4.63    0.23
  -7   4   4    4.85    0.16
  -6  -4   4   13.50    0.37
  -6  -4   4   13.04    0.39
   6  -4  -4   12.68    0.39
   6   4  -4   12.86    0.39
  -6   4   4   12.73    0.32
  -5  -4   4   29.07    0.68
   5  -4  -4   28.13    0.67
  -5  -4   4   28.04    0.65
   5   4  -4   28.97    0.68
  -5   4   4   28.66    0.62
  -4  -4   4    6.37    0.25
   4  -4  -4    6.94    0.26
  -4  -4   4    6.80    0.20
   4   4  -4    7.13    0.25
  -4   4   4    6.69    0.22
   3  -4  -4    7.32    0.26
  -3  -4   4    7.83    0.27
  -3  -4   4    7.46    0.21
  -3  -4   4    7.59    0.24
   3   4  -4    7.00    0.26
   3   4  -4    7.16    0.24
  -3   4   4    7.02    0.23
  -2  -4   4   -0.02    0.06
   2  -4  -4    0.01    0.07
  -2  -4   4    0.01    0.07
  -2   4   4   -0.03    0.07
   2   4  -4    0.05    0.08
   2   4  -4    0.02    0.06
  -1  -4   4   25.26    0.58
   1  -4  -4   25.26    0.59
  -1  -4   4   25.40    0.56
   1   4  -4   25.86    0.57
  -1   4   4   24.71    0.58
  -1   4   4   25.16    0.59
   1   4  -4   25.28    0.58
   0  -4  -4  121.02    2.39
   0  -4   4  121.04    2.39
   0  -4   4  121.68    2.38
   0   4  -4  123.63    2.38
   0   4   4  122.73    2.40
   0   4   4  123.33    2.40
   0   4  -4  123.90    2.37
  -1  -4  -4   21.19    0.51
   1  -4   4   21.56    0.51
   1  -4   4   20.55    0.51
   1   4   4   21.13    0.52
   1   4   4   22.36    0.53
  -1   4  -4   21.73    0.50
   2  -4   4    0.29    0.09
   2  -4   4    0.32    0.08
  -2  -4  -4    0.55    0.09
  -2   4  -4    0.33    0.08
   2   4   4    0.30    0.09
   2   4   4    0.30    0.09
   3  -4   4   -0.02    0.07
  -3  -4  -4   -0.02    0.07
   3   4   4   -0.08    0.08
   3   4   4    0.14    0.08
   4  -4   4    4.05    0.18
   4  -4   4    4.20    0.17
  -4  -4  -4    4.11    0.19
   4   4   4    4.05    0.21
   4   4   4    4.10    0.12
   4   4   4    4.17    0.20
   5  -4   4    0.21    0.08
  -5  -4  -4    0.23    0.08
   5  -4   4    0.27    0.07
   5   4   4    0.24    0.09
   5   4   4    0.19    0.04
   5   4   4    0.17    0.09
   6  -4   4   -0.03    0.06
   6  -4   4   -0.02    0.07
  -6  -4  -4   -0.09    0.06
   6   4   4   -0.08    0.07
  -6   4  -4   -0.02    0.05
   6   4   4   -0.02    0.08
  -7  -4  -4    4.23    0.19
   7  -4   4    4.16    0.20
  -7   4  -4    4.22    0.16
   7   4   4    4.09    0.23
   7   4   4    4.19    0.21
  -8  -4  -4    4.27    0.21
  -8  -4  -4    4.10    0.19
   8  -4   4    3.82    0.20
   8   4   4    3.93    0.23
   8   4   4    4.07    0.22
  -8   4  -4    3.62    0.22
   9  -4   4    0.70    0.12
  -9  -4  -4    0.62    0.11
  -9  -4  -4    0.71    0.12
   9   4   4    0.72    0.13
   9   4   4    0.62    0.13
  10  -4   4    0.38    0.11
 -10  -4  -4    0.46    0.12
  10   4   4    0.27    0.12
  10   4   4    0.54    0.13
 -11  -4  -4    0.22    0.11
  11  -4   4    0.00    0.11
  11   4   4   -0.04    0.12
  11   4   4    0.00    0.11
 -12  -4  -4    6.99    0.31
  12  -4   4    6.87    0.31
  12   4   4    7.53    0.34
  12   4   4    7.42    0.32
 -13  -4  -4    2.50    0.21
  13  -4   4    1.99    0.20
  13   4   4    2.33    0.21
  13   4   4    2.55    0.23
  14  -4   4    6.89    0.33
 -14  -4  -4    6.84    0.33
  14   4   4    6.59    0.32
  14   4   4    7.54    0.36
  15  -4   4    0.35    0.15
 -15  -4  -4    0.22    0.14
  15   4   4    0.32    0.16
  15   4   4    0.41    0.23
  16  -4   4    0.19    0.15
 -16  -4  -4   -0.04    0.12
  16   4   4    0.19    0.16
  17  -4   4   -0.20    0.15
 -17  -4  -4    0.04    0.14
  17   4   4   -0.04    0.16
 -18  -4  -4    1.01    0.21
  18  -4   4    0.86    0.21
  18   4   4    1.25    0.24
  19  -4   4    0.32    0.18
 -19  -4  -4   -0.03    0.15
  19   4   4   -0.01    0.17
  20  -5  -4    0.09    0.22
  20   5  -4    0.37    0.25
  19  -5  -4    0.57    0.25
  19   5  -4    1.25    0.28
  18  -5  -4    1.25    0.25
  18   5  -4    0.92    0.25
  17  -5  -4    3.64    0.35
  17   5  -4    3.57    0.35
  16  -5  -4    0.05    0.16
  16   5  -4   -0.04    0.17
  15  -5  -4    0.22    0.17
  15   5  -4   -0.01    0.11
  15   5  -4    0.09    0.16
 -14  -5   4    0.34    0.16
 -14  -5   4    0.29    0.14
  14  -5  -4    0.34    0.16
  14   5  -4    0.42    0.18
  14   5  -4    0.29    0.12
 -13  -5   4    2.37    0.23
 -13  -5   4    2.02    0.23
  13  -5  -4    1.90    0.21
  13   5  -4    1.85    0.24
  13   5  -4    1.72    0.18
 -13   5   4    1.67    0.23
 -12  -5   4   10.34    0.42
 -12  -5   4   10.45    0.40
  12  -5  -4   11.37    0.44
 -12   5   4   10.76    0.40
  12   5  -4   11.12    0.45
  12   5  -4   10.24    0.37
 -11  -5   4    1.84    0.20
 -11  -5   4    1.92    0.19
  11  -5  -4    1.61    0.19
 -11   5   4    2.33    0.09
  11   5  -4    2.22    0.23
 -11   5   4    2.42    0.22
  11   5  -4    2.30    0.20
 -10  -5   4    4.11    0.25
 -10  -5   4    4.75    0.26
  10  -5  -4    3.78    0.25
 -10   5   4    4.55    0.15
 -10   5   4    4.43    0.26
  10   5  -4    4.42    0.27
  -9  -5   4    1.95    0.17
  -9  -5   4    2.44    0.21
   9  -5  -4    2.00    0.19
  -9   5   4    2.16    0.12
  -9   5   4    2.25    0.20
   9   5  -4    2.17    0.21
  -8  -5   4    1.76    0.17
  -8  -5   4    1.60    0.18
   8  -5  -4    1.33    0.16
  -8   5   4    1.37    0.16
  -8   5   4    1.55    0.12
   8   5  -4    1.69    0.18
  -7  -5   4    6.11    0.26
  -7  -5   4    6.14    0.28
   7  -5  -4    5.70    0.28
  -7   5   4    5.91    0.21
   7   5  -4    5.79    0.27
  -6  -5   4   24.69    0.64
   6  -5  -4   25.18    0.64
  -6  -5   4   25.92    0.62
  -6  -5   4   24.94    0.53
   6   5  -4   24.71    0.64
  -6   5   4   25.66    0.58
  -5  -5   4    7.07    0.25
  -5  -5   4    6.76    0.19
  -5  -5   4    6.49    0.28
   5  -5  -4    6.74    0.27
  -5   5   4    6.50    0.24
   5   5  -4    7.32    0.29
  -4  -5   4   24.93    0.63
   4  -5  -4   26.15    0.64
  -4  -5   4   25.61    0.56
   4   5  -4   26.78    0.64
  -4   5   4   26.21    0.60
  -3  -5   4    0.29    0.08
  -3  -5   4    0.19    0.06
  -3  -5   4    0.10    0.10
   3  -5  -4    0.16    0.10
   3   5  -4    0.05    0.08
  -3   5   4    0.33    0.09
  -2  -5   4    0.10    0.07
  -2  -5   4    0.15    0.09
   2  -5  -4    0.22    0.10
  -2   5   4    0.03    0.08
   2   5  -4    0.06    0.08
   1  -5  -4    3.46    0.20
  -1  -5   4    3.88    0.21
  -1  -5   4    3.91    0.17
  -1   5   4    3.58    0.20
  -1   5   4    3.26    0.19
   1   5  -4    4.06    0.20
   0  -5   4    0.10    0.08
   0  -5  -4    0.28    0.10
   0  -5   4    0.31    0.10
   0   5   4    0.19    0.09
   0   5   4    0.22    0.11
   0   5  -4    0.30    0.09
   1  -5   4    0.80    0.11
  -1  -5  -4    0.70    0.11
   1   5   4    0.90    0.13
   1   5   4    0.88    0.12
  -1   5  -4    0.92    0.11
  -2  -5  -4    2.79    0.18
   2  -5   4    2.89    0.18
   2   5   4    2.72    0.18
   2   5   4    3.10    0.20
  -2   5  -4    2.56    0.16
  -3  -5  -4    2.23    0.16
   3  -5   4    2.31    0.17
   3   5   4    2.45    0.18
   3   5   4    2.43    0.18
   4  -5   4    1.20    0.13
  -4  -5  -4    1.37    0.13
   4   5   4    1.22    0.06
   4   5   4    1.34    0.15
   4   5   4    1.20    0.14
   5  -5   4    7.79    0.28
  -5  -5  -4    7.31    0.28
   5   5   4    8.09    0.30
   5   5   4    7.90    0.30
  -6  -5  -4    1.70    0.15
   6  -5   4    1.72    0.15
   6   5   4    1.82    0.17
   6   5   4    1.69    0.17
   7  -5   4    2.47    0.19
  -7  -5  -4    2.16    0.17
   7   5   4    2.09    0.18
   7   5   4    1.85    0.18
  -7   5  -4    2.02    0.14
  -8  -5  -4    5.54    0.24
   8  -5   4    5.53    0.26
  -8  -5  -4    5.50    0.26
   8   5   4    5.92    0.29
   8   5   4    5.51    0.28
   9  -5   4    0.03    0.11
  -9  -5  -4    0.07    0.10
   9   5   4    0.00    0.11
   9   5   4    0.02    0.12
  10  -5   4    4.63    0.26
 -10  -5  -4    4.56    0.26
  10   5   4    4.44    0.27
  10   5   4    4.43    0.27
 -11  -5  -4    9.34    0.37
  11  -5   4   10.04    0.38
  11   5   4    9.81    0.39
  11   5   4   10.69    0.40
  12  -5   4    0.55    0.15
 -12  -5  -4    0.41    0.13
  12   5   4    0.51    0.16
  12   5   4    0.47    0.15
 -13  -5  -4    0.81    0.16
  13  -5   4    0.56    0.15
  13   5   4    0.71    0.18
  13   5   4    1.02    0.17
  14  -5   4    0.27    0.15
 -14  -5  -4    0.23    0.14
  14   5   4    0.22    0.16
  14   5   4    0.27    0.15
 -15  -5  -4    0.12    0.13
  15  -5   4    0.11    0.14
  15   5   4    0.22    0.17
  15   5   4    0.21    0.14
  16  -5   4    1.10    0.21
 -16  -5  -4    1.27    0.20
  16   5   4    0.93    0.21
 -17  -5  -4   -0.18    0.13
  17  -5   4   -0.10    0.16
  17   5   4   -0.02    0.16
 -18  -5  -4    0.11    0.16
  18  -5   4   -0.04    0.18
  18   5   4   -0.05    0.18
  20  -6  -4    6.38    0.52
  20   6  -4    5.58    0.48
  19  -6  -4    0.06    0.23
  19   6  -4    0.27    0.23
  18  -6  -4    0.57    0.23
  18   6  -4    0.52    0.23
  17  -6  -4    0.23    0.19
  17   6  -4   -0.13    0.18
  16  -6  -4   -0.09    0.17
  16   6  -4    0.03    0.14
  16   6  -4    0.39    0.20
  15  -6  -4    0.20    0.16
  15   6  -4   -0.02    0.17
  15   6  -4    0.24    0.13
  14  -6  -4    0.20    0.17
  14   6  -4    0.21    0.13
  14   6  -4    0.01    0.16
 -13  -6   4    0.67    0.17
  13  -6  -4    0.93    0.20
  13   6  -4    0.59    0.15
  13   6  -4    0.58    0.19
 -12  -6   4    1.62    0.22
  12  -6  -4    1.65    0.22
 -12   6   4    1.72    0.21
  12   6  -4    1.77    0.20
  12   6  -4    1.83    0.24
 -11  -6   4    3.89    0.26
 -11  -6   4    3.84    0.29
  11  -6  -4    4.07    0.30
  11   6  -4    3.95    0.31
 -11   6   4    3.82    0.16
 -11   6   4    4.15    0.28
  11   6  -4    4.19    0.27
  10  -6  -4    5.63    0.33
 -10  -6   4    5.38    0.31
 -10  -6   4    5.21    0.29
 -10   6   4    4.71    0.20
  10   6  -4    5.40    0.33
 -10   6   4    5.46    0.30
  10   6  -4    5.82    0.30
   9  -6  -4    8.00    0.36
  -9  -6   4    7.63    0.33
  -9  -6   4    7.66    0.35
  -9  -6   4    7.60    0.19
   9   6  -4    8.26    0.36
  -9   6   4    7.97    0.26
  -9   6   4    8.21    0.33
   8  -6  -4   -0.10    0.13
  -8  -6   4    0.17    0.12
  -8  -6   4    0.18    0.10
  -8  -6   4    0.03    0.04
   8   6  -4    0.42    0.15
  -8   6   4    0.03    0.08
   7  -6  -4    6.06    0.30
  -7  -6   4    6.01    0.28
  -7  -6   4    5.12    0.26
  -7  -6   4    5.59    0.16
   7   6  -4    5.88    0.31
  -7   6   4    5.36    0.23
  -6  -6   4    6.00    0.28
   6  -6  -4    5.88    0.30
  -6  -6   4    5.97    0.18
  -6  -6   4    5.95    0.26
  -6   6   4    6.32    0.25
   6   6  -4    6.26    0.30
  -5  -6   4    0.55    0.07
  -5  -6   4    0.76    0.14
   5  -6  -4    0.45    0.13
  -5  -6   4    0.63    0.11
   5   6  -4    0.47    0.13
  -5   6   4    0.56    0.10
  -4  -6   4    1.66    0.11
  -4  -6   4    1.72    0.18
   4  -6  -4    1.28    0.15
  -4   6   4    1.76    0.15
   4   6  -4    1.16    0.14
  -3  -6   4   39.56    0.81
  -3  -6   4   37.80    0.86
   3  -6  -4   39.39    0.90
  -3  -6   4   38.08    0.90
  -3   6   4   38.20    0.86
   3   6  -4   38.69    0.90
  -2  -6   4    4.31    0.24
   2  -6  -4    4.54    0.23
  -2   6   4    4.80    0.23
   2   6  -4    4.82    0.24
  -2   6   4    4.97    0.25
   1  -6  -4    1.89    0.17
  -1  -6   4    1.58    0.16
  -1   6   4    1.61    0.16
   1   6  -4    1.80    0.17
  -1   6   4    1.29    0.14
   0  -6   4    2.89    0.20
   0  -6  -4    2.76    0.19
   0   6   4    2.96    0.20
   0   6   4    2.67    0.20
   0   6  -4    2.91    0.19
  -1  -6  -4    0.26    0.10
   1  -6   4    0.43    0.11
   1   6   4    0.25    0.11
   1   6   4    0.14    0.10
  -1   6  -4    0.34    0.10
  -2  -6  -4    6.27    0.27
   2  -6   4    6.72    0.27
  -2   6  -4    5.99    0.25
   2   6   4    6.14    0.28
   2   6   4    6.66    0.29
   3  -6   4    7.73    0.30
  -3  -6  -4    7.53    0.29
   3   6   4    7.76    0.31
   3   6   4    7.91    0.32
  -4  -6  -4    1.36    0.15
   4  -6   4    1.23    0.14
   4   6   4    1.12    0.15
   4   6   4    1.39    0.16
   5  -6   4    0.16    0.10
  -5  -6  -4    0.27    0.11
   5   6   4   -0.09    0.11
   5   6   4    0.14    0.11
  -6  -6  -4    6.48    0.28
   6  -6   4    6.24    0.28
   6   6   4    6.31    0.30
   6   6   4    6.28    0.30
   7  -6   4    2.68    0.22
  -7  -6  -4    2.53    0.20
   7   6   4    2.72    0.22
   7   6   4    2.76    0.23
   8  -6   4    0.15    0.12
  -8  -6  -4    0.06    0.11
  -8  -6  -4    0.13    0.11
   8   6   4    0.16    0.13
   8   6   4   -0.02    0.12
  -9  -6  -4    2.50    0.21
   9  -6   4    2.38    0.22
   9   6   4    2.16    0.22
   9   6   4    2.72    0.24
  10  -6   4    7.29    0.34
 -10  -6  -4    7.44    0.34
  10   6   4    7.55    0.36
  10   6   4    7.62    0.36
  11  -6   4    0.32    0.14
 -11  -6  -4    0.33    0.13
  11   6   4    0.43    0.16
  11   6   4    0.08    0.14
  12  -6   4    0.77    0.17
 -12  -6  -4    0.91    0.16
  12   6   4    0.84    0.18
  12   6   4    0.92    0.19
 -13  -6  -4    0.44    0.14
  13  -6   4    0.40    0.16
  13   6   4    0.60    0.18
  13   6   4    0.03    0.15
  14  -6   4    0.11    0.15
 -14  -6  -4   -0.02    0.13
  14   6   4    0.01    0.14
  14   6   4   -0.01    0.16
  15  -6   4    0.19    0.17
 -15  -6  -4    0.41    0.16
  15   6   4    0.41    0.19
  15   6   4    0.50    0.18
  16  -6   4   -0.10    0.16
 -16  -6  -4    0.06    0.15
  16   6   4    0.52    0.20
  17  -6   4    0.14    0.18
 -17  -6  -4   -0.19    0.14
  17   6   4    0.17    0.20
 -18  -6  -4    0.63    0.26
  18  -6   4    0.89    0.22
  18   6   4    0.64    0.22
  19  -7  -4    2.03    0.32
  19   7  -4    2.00    0.34
  18  -7  -4    0.20    0.23
  18   7  -4   -0.03    0.21
  17  -7  -4    0.25    0.21
  17   7  -4    0.17    0.20
  16  -7  -4    0.01    0.18
  16   7  -4   -0.13    0.13
  16   7  -4    0.23    0.21
  15  -7  -4    0.00    0.17
  15   7  -4   -0.29    0.17
  15   7  -4   -0.14    0.13
  14  -7  -4    0.43    0.19
  14   7  -4    0.25    0.20
  14   7  -4    0.67    0.16
  13  -7  -4    0.36    0.18
 -13  -7   4    0.16    0.17
  13   7  -4    0.15    0.14
  13   7  -4    0.25    0.19
 -12  -7   4    0.01    0.15
  12  -7  -4   -0.04    0.15
  12   7  -4    0.01    0.17
  12   7  -4   -0.15    0.12
  11  -7  -4    5.35    0.35
 -11  -7   4    5.66    0.34
  11   7  -4    5.19    0.31
 -11   7   4    5.27    0.32
  11   7  -4    5.86    0.37
  10  -7  -4    5.05    0.33
 -10  -7   4    5.02    0.32
  10   7  -4    6.42    0.37
 -10   7   4    5.45    0.32
 -10   7   4    5.04    0.22
  10   7  -4    5.13    0.31
  -9  -7   4    0.15    0.15
   9  -7  -4    0.17    0.16
   9   7  -4    0.28    0.16
  -9   7   4    0.27    0.10
  -9   7   4    0.44    0.15
  -8  -7   4   13.09    0.47
   8  -7  -4   14.62    0.50
   8   7  -4   13.82    0.50
  -8   7   4   13.07    0.39
  -7  -7   4   -0.03    0.12
  -7  -7   4    0.13    0.11
   7  -7  -4    0.25    0.14
  -7   7   4    0.00    0.10
   7   7  -4    0.34    0.16
  -6  -7   4   42.39    0.99
   6  -7  -4   43.91    1.04
  -6  -7   4   42.36    1.03
  -6   7   4   42.60    0.96
   6   7  -4   43.54    1.04
  -5  -7   4   12.45    0.44
   5  -7  -4   12.78    0.45
   5   7  -4   12.44    0.44
  -5   7   4   12.79    0.40
   4  -7  -4    0.39    0.13
  -4  -7   4    0.55    0.11
  -4  -7   4    0.33    0.13
   4   7  -4    0.59    0.15
  -4   7   4    0.54    0.11
   3  -7  -4    7.39    0.32
  -3  -7   4    7.77    0.32
  -3  -7   4    6.25    0.39
   3   7  -4    7.33    0.31
  -3   7   4    7.39    0.30
  -2  -7   4    2.65    0.22
   2  -7  -4    2.22    0.21
  -2   7   4    2.19    0.18
  -2   7   4    2.70    0.23
   2   7  -4    2.66    0.20
   1  -7  -4    1.39    0.17
  -1  -7   4    1.87    0.19
   1   7  -4    1.71    0.18
  -1   7   4    1.55    0.17
  -1   7   4    1.61    0.17
   0  -7  -4   -0.01    0.10
   0  -7   4    0.22    0.12
   0   7  -4    0.18    0.11
   0   7   4    0.06    0.11
   0   7   4   -0.01    0.10
   1  -7   4    0.04    0.10
  -1  -7  -4   -0.01    0.10
  -1   7  -4   -0.03    0.09
   1   7   4    0.03    0.12
   1   7   4    0.14    0.12
  -2  -7  -4    3.87    0.23
   2  -7   4    4.00    0.25
   2   7   4    3.86    0.26
   2   7   4    4.26    0.25
  -2   7  -4    4.41    0.23
  -3  -7  -4    5.79    0.29
   3  -7   4    6.47    0.30
   3   7   4    6.36    0.30
   3   7   4    5.78    0.29
   4  -7   4    6.66    0.30
  -4  -7  -4    6.40    0.30
   4   7   4    6.93    0.32
   4   7   4    6.59    0.33
  -5  -7  -4    0.42    0.13
   5  -7   4    0.27    0.13
   5   7   4    0.35    0.14
   5   7   4    0.29    0.14
  -6  -7  -4    3.26    0.23
   6  -7   4    2.99    0.24
   6   7   4    2.76    0.25
   6   7   4    3.37    0.27
  -7  -7  -4    1.05    0.16
   7  -7   4    0.78    0.16
  -7  -7  -4    0.72    0.15
   7   7   4    0.75    0.16
   7   7   4    0.80    0.17
  -8  -7  -4    6.07    0.31
   8  -7   4    5.15    0.30
   8   7   4    5.58    0.33
   8   7   4    5.53    0.33
   9  -7   4    0.54    0.16
  -9  -7  -4    0.74    0.15
   9   7   4    0.82    0.17
   9   7   4    0.58    0.17
  10  -7   4    1.22    0.19
 -10  -7  -4    1.16    0.18
  10   7   4    1.51    0.21
  10   7   4    1.53    0.21
 -11  -7  -4    3.22    0.27
  11  -7   4    3.02    0.26
  11   7   4    3.17    0.28
  11   7   4    2.62    0.27
 -12  -7  -4    0.43    0.16
  12  -7   4    0.41    0.16
  12   7   4    0.24    0.17
  12   7   4    0.16    0.16
  13  -7   4    0.25    0.17
 -13  -7  -4    0.35    0.16
  13   7   4    0.20    0.16
  13   7   4    0.19    0.18
  14  -7   4    1.30    0.22
 -14  -7  -4    1.44    0.22
  14   7   4    1.60    0.25
  14   7   4    1.31    0.23
 -15  -7  -4    0.21    0.16
  15  -7   4    0.76    0.20
  15   7   4    0.23    0.20
  15   7   4    0.18    0.17
 -16  -7  -4    0.06    0.24
  16  -7   4    0.14    0.18
  16   7   4   -0.28    0.18
  17  -7   4    0.44    0.21
  17   7   4    0.70    0.24
  18  -8  -4    1.67    0.31
  18   8  -4    1.73    0.32
  17  -8  -4    0.10    0.22
  17   8  -4   -0.41    0.19
  16  -8  -4    0.33    0.22
  16   8  -4    0.04    0.16
  16   8  -4   -0.03    0.22
  15  -8  -4    0.53    0.22
  15   8  -4    0.49    0.23
  15   8  -4    0.20    0.16
  14  -8  -4    0.09    0.19
  14   8  -4   -0.19    0.19
  14   8  -4   -0.17    0.15
  13  -8  -4    0.59    0.21
  13   8  -4    0.55    0.18
  13   8  -4    0.84    0.21
 -12  -8   4    1.48    0.24
  12  -8  -4    1.13    0.23
  12   8  -4    1.07    0.22
  12   8  -4    1.21    0.21
 -11  -8   4    0.04    0.14
  11  -8  -4    0.26    0.17
  11   8  -4    0.35    0.19
  11   8  -4    0.15    0.14
  10  -8  -4    3.10    0.29
 -10  -8   4    3.21    0.30
  10   8  -4    2.84    0.27
 -10   8   4    3.11    0.27
  10   8  -4    3.49    0.33
 -10   8   4    2.60    0.20
  -9  -8   4    0.19    0.14
   9  -8  -4   -0.18    0.16
   9   8  -4    0.18    0.16
  -9   8   4   -0.15    0.10
   9   8  -4    0.03    0.15
  -8  -8   4    0.30    0.17
   8  -8  -4    0.40    0.17
  -8   8   4    0.49    0.12
   8   8  -4    0.66    0.19
  -7  -8   4    0.64    0.18
   7  -8  -4    0.23    0.15
  -7   8   4    0.27    0.13
   7   8  -4    0.25    0.15
  -6  -8   4   12.21    0.48
   6  -8  -4   11.80    0.46
  -6   8   4   12.65    0.41
   6   8  -4   12.45    0.49
  -5  -8   4    7.27    0.38
   5  -8  -4    7.30    0.37
  -5   8   4    6.13    0.30
   5   8  -4    7.02    0.37
  -4  -8   4    0.04    0.15
   4  -8  -4    0.15    0.14
  -4   8   4    0.03    0.12
   4   8  -4    0.08    0.15
  -3  -8   4    4.83    0.31
   3  -8  -4    4.39    0.28
   3   8  -4    4.66    0.30
  -3   8   4    4.18    0.27
   2  -8  -4    1.05    0.19
  -2  -8   4    1.09    0.19
   2   8  -4    1.24    0.19
  -2   8   4    0.87    0.15
  -1  -8   4    8.25    0.36
   1  -8  -4    8.53    0.38
  -1   8   4    8.26    0.36
   1   8  -4    7.89    0.35
  -1   8   4    7.82    0.35
   0  -8  -4    4.28    0.29
   0  -8   4    3.92    0.28
   0   8  -4    4.10    0.26
   0   8   4    4.08    0.27
   0   8   4    4.21    0.28
  -1  -8  -4    7.95    0.36
   1  -8   4    8.16    0.36
  -1   8  -4    7.72    0.34
   1   8   4    8.20    0.36
   1   8   4    7.85    0.37
   2  -8   4   -0.04    0.11
  -2  -8  -4   -0.04    0.13
  -2   8  -4    0.14    0.12
   2   8   4    0.09    0.12
   2   8   4    0.05    0.13
  -3  -8  -4   -0.39    0.11
   3  -8   4    0.01    0.13
   3   8   4   -0.19    0.13
   3   8   4   -0.01    0.13
   4  -8   4   21.48    0.62
  -4  -8  -4   20.61    0.62
   4   8   4   21.73    0.65
   4   8   4   20.58    0.63
  -5  -8  -4    1.96    0.22
   5  -8   4    1.62    0.20
   5   8   4    2.11    0.24
   5   8   4    1.45    0.21
  -6  -8  -4    0.13    0.13
   6  -8   4    0.27    0.14
  -6  -8  -4    0.16    0.14
   6   8   4    0.04    0.15
   6   8   4    0.02    0.14
   7  -8   4    0.05    0.14
  -7  -8  -4   -0.12    0.12
   7   8   4    0.09    0.14
   7   8   4   -0.04    0.15
   8  -8   4   14.73    0.51
  -8  -8  -4   14.08    0.50
   8   8   4   14.35    0.53
   8   8   4   13.93    0.53
  -9  -8  -4   -0.10    0.12
   9  -8   4    0.00    0.14
   9   8   4    0.03    0.16
   9   8   4   -0.11    0.15
  10  -8   4    0.45    0.17
 -10  -8  -4    0.74    0.17
  10   8   4    0.31    0.17
  10   8   4    0.71    0.19
 -11  -8  -4    0.89    0.19
  11  -8   4    1.05    0.21
  11   8   4    0.91    0.22
  11   8   4    0.79    0.18
 -12  -8  -4   -0.09    0.13
  12  -8   4    0.04    0.16
  12   8   4    0.10    0.17
  12   8   4    0.28    0.18
  13  -8   4    0.87    0.21
 -13  -8  -4    0.97    0.26
  13   8   4    0.96    0.23
  13   8   4    0.87    0.21
  14  -8   4   -0.14    0.17
  14   8   4    0.00    0.20
  14   8   4   -0.11    0.17
  15  -8   4    0.45    0.21
  15   8   4    0.62    0.24
  15   8   4    0.19    0.19
  16  -8   4    0.10    0.20
  16   8   4    0.30    0.23
  17  -9  -4    0.40    0.27
  17   9  -4    0.47    0.27
  16  -9  -4   -0.06    0.21
  16   9  -4   -0.04    0.21
  16   9  -4    0.34    0.19
  15  -9  -4    0.68    0.24
  15   9  -4    0.89    0.25
  15   9  -4    0.78    0.20
  14  -9  -4    0.35    0.20
  14   9  -4    0.03    0.22
  14   9  -4   -0.16    0.16
  13  -9  -4   -0.08    0.17
  13   9  -4    0.02    0.16
  13   9  -4    0.07    0.19
  12  -9  -4   -0.18    0.16
 -12  -9   4    0.33    0.20
  12   9  -4    0.13    0.17
  12   9  -4    0.14    0.19
 -11  -9   4    0.11    0.17
  11  -9  -4    0.13    0.17
  11   9  -4    0.13    0.17
  11   9  -4    0.22    0.21
  10  -9  -4    4.16    0.34
 -10  -9   4    5.38    0.37
  10   9  -4    3.73    0.32
  10   9  -4    4.66    0.38
   9  -9  -4    2.85    0.29
  -9  -9   4    3.15    0.30
   9   9  -4    3.71    0.30
  -9   9   4    2.81    0.23
   9   9  -4    3.09    0.30
  -8  -9   4    0.41    0.19
   8  -9  -4    0.44    0.19
   8   9  -4    0.62    0.20
  -8   9   4    0.34    0.14
  -7  -9   4    0.52    0.19
   7  -9  -4    0.19    0.18
  -7   9   4    0.29    0.14
   7   9  -4    0.38    0.19
  -6  -9   4    0.45    0.17
   6  -9  -4    0.47    0.19
   6   9  -4    0.69    0.18
  -6   9   4    0.65    0.15
   5  -9  -4    0.94    0.20
  -5  -9   4    0.87    0.20
   5   9  -4    1.19    0.22
  -5   9   4    0.78    0.17
  -4  -9   4    0.23    0.18
   4  -9  -4    0.17    0.17
  -4   9   4    0.07    0.14
   4   9  -4    0.26    0.15
   3  -9  -4    0.95    0.20
  -3  -9   4    0.98    0.21
   3   9  -4    0.68    0.17
  -3   9   4    0.93    0.17
  -2  -9   4    1.45    0.21
   2  -9  -4    2.19    0.26
   2   9  -4    2.08    0.24
  -2   9   4    1.60    0.19
   1  -9  -4   24.68    0.72
  -1  -9   4   23.17    0.71
  -1   9   4   25.63    0.71
  -1   9   4   25.85    0.74
   1   9  -4   24.62    0.71
   0  -9  -4    2.92    0.27
   0  -9   4    2.90    0.28
   0   9  -4    2.80    0.25
   0   9   4    3.14    0.29
   0   9   4    2.87    0.26
   1  -9   4    0.09    0.15
  -1  -9  -4   -0.03    0.15
  -1   9  -4    0.02    0.14
   1   9   4   -0.01    0.15
   1   9   4    0.10    0.14
   2  -9   4    1.28    0.20
  -2  -9  -4    1.36    0.21
   2   9   4    1.59    0.22
  -2   9  -4    1.23    0.19
   2   9   4    1.31    0.21
  -3  -9  -4    3.13    0.26
   3  -9   4    3.28    0.28
   3   9   4    2.98    0.28
   3   9   4    3.19    0.28
   4  -9   4    0.68    0.17
  -4  -9  -4    0.65    0.17
   4   9   4    0.64    0.18
   4   9   4    0.54    0.17
   5  -9   4    1.04    0.20
  -5  -9  -4    1.94    0.23
   5   9   4    1.69    0.24
   5   9   4    1.22    0.22
   6  -9   4    2.15    0.24
  -6  -9  -4    1.89    0.24
   6   9   4    2.30    0.27
   6   9   4    2.16    0.27
   7  -9   4   -0.21    0.15
   7   9   4    0.06    0.17
   7   9   4    0.03    0.16
   8  -9   4   -0.22    0.15
   8   9   4   -0.05    0.16
   8   9   4    0.10    0.15
   9  -9   4    0.39    0.18
   9   9   4    0.34    0.18
   9   9   4    0.19    0.18
  10  -9   4    0.54    0.19
  10   9   4    0.28    0.19
  10   9   4    0.06    0.19
  11  -9   4    0.39    0.20
  11   9   4    0.22    0.18
  11   9   4    0.60    0.21
  12  -9   4    0.46    0.21
  12   9   4    0.72    0.22
  12   9   4    0.33    0.20
  13  -9   4    0.57    0.22
  13   9   4   -0.09    0.17
  13   9   4    0.01    0.20
  14  -9   4    0.80    0.23
  14   9   4    0.64    0.24
  14   9   4    0.40    0.20
  15  -9   4    0.12    0.20
  15   9   4    0.01    0.22
  15   9   4    0.23    0.19
  16 -10  -4   -0.10    0.23
  16  10  -4    0.17    0.25
  16  10  -4    0.41    0.21
  15 -10  -4    0.77    0.27
  15  10  -4    0.34    0.21
  15  10  -4    1.11    0.30
  14 -10  -4    0.25    0.24
  14  10  -4   -0.07    0.18
  14  10  -4   -0.09    0.24
  13 -10  -4    0.77    0.26
  13  10  -4    0.44    0.25
  13  10  -4    0.24    0.20
  12 -10  -4   -0.01    0.21
  12  10  -4    0.55    0.24
  12  10  -4   -0.02    0.16
 -11 -10   4    0.40    0.21
  11 -10  -4    0.90    0.23
  11  10  -4    0.55    0.21
  11  10  -4    0.54    0.22
  10 -10  -4    0.57    0.23
 -10 -10   4    0.24    0.18
  10  10  -4    0.23    0.17
  10  10  -4    0.20    0.19
   9 -10  -4    0.73    0.23
  -9 -10   4    1.27    0.23
   9  10  -4    1.12    0.25
  -9  10   4    0.58    0.16
   9  10  -4    1.14    0.22
   8 -10  -4   -0.02    0.19
  -8 -10   4    0.12    0.19
  -8  10   4   -0.09    0.13
   8  10  -4    0.01    0.16
   8  10  -4   -0.13    0.18
  -7 -10   4    1.66    0.26
   7 -10  -4    1.47    0.25
   7  10  -4    1.79    0.26
   7  10  -4    1.79    0.28
  -7  10   4    1.47    0.21
  -6 -10   4    0.05    0.16
   6 -10  -4    0.05    0.19
  -6  10   4   -0.16    0.13
   6  10  -4   -0.05    0.18
   5 -10  -4    3.03    0.31
  -5 -10   4    1.83    0.25
  -5  10   4    2.27    0.24
   5  10  -4    2.68    0.29
   4 -10  -4    1.81    0.26
  -4 -10   4    1.48    0.23
  -4  10   4    1.24    0.19
   4  10  -4    1.98    0.26
  -3 -10   4    2.07    0.25
   3 -10  -4    2.15    0.27
   3  10  -4    2.10    0.24
  -3  10   4    2.27    0.25
  -2 -10   4   -0.05    0.15
   2 -10  -4    0.11    0.16
  -2  10   4    0.19    0.16
   2  10  -4    0.04    0.16
   1 -10  -4    0.17    0.17
  -1 -10   4    0.75    0.20
  -1  10   4    0.34    0.17
  -1  10   4    0.02    0.18
   1  10  -4    0.13    0.16
   0 -10   4    0.18    0.18
   0 -10  -4    0.03    0.17
   0  10   4    0.32    0.17
   0  10   4    0.13    0.15
   0  10  -4    0.00    0.14
  -1 -10  -4    2.78    0.27
   1 -10   4    2.70    0.27
   1  10   4    2.45    0.29
  -1  10  -4    2.99    0.28
   1  10   4    2.80    0.28
  -2 -10  -4    0.14    0.17
   2 -10   4    0.19    0.18
   2  10   4    0.01    0.17
   2  10   4    0.24    0.16
   3 -10   4    0.18    0.17
  -3 -10  -4    0.24    0.18
   3  10   4    0.49    0.19
   3  10   4    0.44    0.18
   4 -10   4    0.27    0.17
  -4 -10  -4    0.17    0.16
   4  10   4    0.35    0.17
   4  10   4    0.10    0.17
  -5 -10  -4    1.61    0.24
   5 -10   4    1.57    0.23
   5  10   4    1.17    0.22
   5  10   4    1.44    0.23
   6 -10   4    1.08    0.21
   6  10   4    0.99    0.21
   6  10   4    1.42    0.25
   7 -10   4    0.12    0.17
   7  10   4    0.11    0.18
   7  10   4    0.30    0.20
   8 -10   4   -0.13    0.18
   8  10   4    0.07    0.18
   8  10   4    0.10    0.20
   9 -10   4    0.10    0.18
   9  10   4   -0.07    0.16
   9  10   4    0.13    0.20
  10 -10   4    1.14    0.26
  10  10   4    1.29    0.26
  10  10   4    1.11    0.27
  11 -10   4    0.44    0.21
  11  10   4    0.76    0.23
  11  10   4    0.55    0.23
  12 -10   4    0.78    0.23
  12  10   4    0.99    0.25
  12  10   4    0.17    0.22
  13 -10   4    0.07    0.22
  13  10   4    0.22    0.21
  13  10   4    0.55    0.25
  14 -10   4   -0.12    0.21
  14  10   4   -0.16    0.19
  14  10   4    0.08    0.22
  14 -11  -4    0.67    0.27
  14  11  -4    1.07    0.31
  14  11  -4    1.42    0.27
  13 -11  -4    0.10    0.23
  13  11  -4   -0.15    0.19
  13  11  -4    0.30    0.26
  12 -11  -4    0.36    0.26
  12  11  -4    0.20    0.21
  12  11  -4    0.48    0.26
  11 -11  -4    0.19    0.21
  11  11  -4   -0.13    0.20
  11  11  -4   -0.23    0.21
 -10 -11   4    0.33    0.22
  10 -11  -4    0.13    0.24
  10  11  -4    0.35    0.22
  10  11  -4    0.31    0.23
   9 -11  -4   -0.03    0.22
  -9 -11   4    0.24    0.19
   9  11  -4   -0.21    0.18
   9  11  -4    0.05    0.20
   8 -11  -4    2.24    0.30
  -8 -11   4    2.65    0.33
   8  11  -4    2.84    0.34
   8  11  -4    2.15    0.28
  -8  11   4    2.26    0.24
   7 -11  -4    0.02    0.19
  -7 -11   4    0.09    0.21
   7  11  -4    0.05    0.20
   7  11  -4   -0.12    0.17
  -7  11   4   -0.03    0.15
  -6 -11   4   -0.09    0.19
   6 -11  -4    0.17    0.18
   6  11  -4    0.21    0.21
  -6  11   4    0.06    0.16
   6  11  -4    0.33    0.21
   5 -11  -4    0.50    0.22
  -5 -11   4    0.21    0.20
   5  11  -4   -0.01    0.19
  -5  11   4    0.10    0.16
   4 -11  -4    0.26    0.20
  -4 -11   4   -0.13    0.19
  -4  11   4    0.03    0.17
   4  11  -4    0.40    0.20
   3 -11  -4    0.30    0.21
  -3 -11   4   -0.12    0.19
  -3  11   4    0.09    0.15
   3  11  -4    0.21    0.19
   2 -11  -4    3.23    0.33
  -2 -11   4    3.95    0.36
  -2  11   4    3.60    0.30
   2  11  -4    2.99    0.29
   1 -11  -4    0.28    0.20
  -1 -11   4    0.15    0.20
   1  11  -4    0.37    0.18
  -1  11   4   -0.04    0.17
   0 -11  -4    0.51    0.20
   0 -11   4    0.34    0.20
   0  11   4    0.25    0.17
   0  11  -4    0.14    0.16
   0  11   4    0.28    0.20
  -1 -11  -4   -0.07    0.18
   1 -11   4    0.09    0.17
   1  11   4   -0.02    0.17
   1  11   4   -0.21    0.15
   2 -11   4    0.21    0.19
  -2 -11  -4    0.09    0.18
   2  11   4    0.04    0.18
   2  11   4   -0.07    0.19
   3 -11   4    0.02    0.18
  -3 -11  -4    0.04    0.18
   3  11   4    0.26    0.19
   3  11   4   -0.01    0.19
   4 -11   4    0.18    0.18
  -4 -11  -4   -0.03    0.17
   4  11   4   -0.21    0.17
   4  11   4    0.14    0.20
   5 -11   4    0.42    0.20
   5  11   4    0.86    0.24
   5  11   4    0.68    0.21
   6 -11   4    0.71    0.23
   6  11   4    0.67    0.22
   6  11   4    0.68    0.21
   7 -11   4    0.20    0.20
   7  11   4    0.16    0.21
   7  11   4    0.23    0.20
   8 -11   4    0.45    0.22
   8  11   4    0.56    0.24
   8  11   4    0.28    0.22
   9 -11   4    0.22    0.21
   9  11   4    0.15    0.21
   9  11   4    0.17    0.23
  10 -11   4    0.12    0.22
  10  11   4    0.16    0.22
  10  11   4    0.09    0.18
  11 -11   4    0.02    0.21
  11  11   4   -0.06    0.23
  11  11   4   -0.09    0.20
  12 -11   4    0.20    0.23
  12  11   4   -0.01    0.23
  12  11   4   -0.14    0.20
  12 -12  -4    0.04    0.22
  12  12  -4    0.12    0.25
  12  12  -4   -0.19    0.18
  11 -12  -4   -0.27    0.23
  11  12  -4    0.16    0.19
  11  12  -4    0.00    0.24
  10 -12  -4    1.95    0.34
  10  12  -4    2.39    0.33
  10  12  -4    2.05    0.32
   9 -12  -4    0.35    0.26
  -9 -12   4    0.43    0.25
   9  12  -4    0.30    0.22
   9  12  -4   -0.32    0.19
   8 -12  -4    1.23    0.30
  -8 -12   4    1.53    0.30
   8  12  -4    1.55    0.30
  -8  12   4    1.32    0.34
   8  12  -4    1.53    0.32
   7 -12  -4    0.84    0.25
  -7 -12   4    0.76    0.26
   7  12  -4    0.70    0.26
  -7  12   4    0.92    0.21
   7  12  -4    0.91    0.28
  -6 -12   4    1.38    0.29
   6 -12  -4    1.67    0.30
   6  12  -4    1.10    0.27
  -6  12   4    1.72    0.25
   6  12  -4    1.00    0.25
  -5 -12   4   -0.14    0.21
   5 -12  -4   -0.01    0.19
   5  12  -4    0.19    0.22
   5  12  -4    0.00    0.19
  -5  12   4   -0.34    0.15
  -4 -12   4    0.21    0.20
   4 -12  -4    0.02    0.22
   4  12  -4    0.40    0.22
  -4  12   4   -0.02    0.18
   4  12  -4   -0.03    0.20
   3 -12  -4    0.32    0.24
  -3 -12   4    0.42    0.23
   3  12  -4    0.62    0.20
  -3  12   4    0.86    0.22
   2 -12  -4    4.96    0.42
  -2 -12   4    5.03    0.42
  -2  12   4    5.09    0.39
   2  12  -4    4.60    0.38
  -1 -12   4    0.92    0.26
   1 -12  -4    0.65    0.24
  -1  12   4    0.79    0.21
   0 -12   4    0.21    0.21
   0 -12  -4    0.02    0.20
   0  12   4   -0.12    0.18
   0  12   4   -0.06    0.21
  -1 -12  -4    0.43    0.22
   1 -12   4   -0.02    0.20
   1  12   4    0.14    0.21
   1  12   4    0.40    0.24
  -2 -12  -4    0.27    0.20
   2 -12   4   -0.09    0.18
   2  12   4   -0.05    0.17
   2  12   4   -0.11    0.21
  -3 -12  -4    0.09    0.31
   3 -12   4    0.24    0.22
   3  12   4    0.56    0.25
   3  12   4    0.32    0.22
   4 -12   4    0.01    0.21
   4  12   4   -0.04    0.21
   4  12   4   -0.22    0.17
   5 -12   4    0.18    0.22
   5  12   4    0.20    0.21
   5  12   4    0.16    0.20
   6 -12   4    0.21    0.22
   6  12   4    0.52    0.25
   6  12   4    0.48    0.24
   7 -12   4    0.04    0.21
   7  12   4   -0.05    0.19
   7  12   4   -0.08    0.22
   8 -12   4    0.09    0.23
   8  12   4    0.15    0.23
   8  12   4    0.12    0.24
   9 -12   4    0.22    0.23
   9  12   4   -0.08    0.23
   9  12   4    0.38    0.24
  10 -12   4   -0.19    0.22
  10  12   4   -0.02    0.23
   9 -13  -4   -0.01    0.26
   9  13  -4    0.19    0.26
  -8 -13   4    0.83    0.28
   8 -13  -4    0.86    0.28
   8  13  -4    0.70    0.25
   8  13  -4    0.98    0.29
  -7 -13   4   -0.34    0.23
   7 -13  -4    0.16    0.27
   7  13  -4    0.36    0.24
  -7  13   4    0.13    0.19
   7  13  -4    0.22    0.24
   6 -13  -4    0.17    0.26
  -6 -13   4   -0.25    0.23
  -6  13   4    0.28    0.20
   6  13  -4    0.07    0.24
   6  13  -4    0.24    0.22
  -5 -13   4    0.59    0.25
   5 -13  -4    0.58    0.25
  -5  13   4    0.39    0.21
   5  13  -4    0.62    0.26
   5  13  -4    0.47    0.25
   4 -13  -4    1.34    0.29
  -4 -13   4    1.72    0.32
   4  13  -4    1.04    0.28
   4  13  -4    2.08    0.46
  -4  13   4    1.09    0.25
   3 -13  -4    1.25    0.31
  -3 -13   4    1.43    0.31
  -3  13   4    1.15    0.23
   3  13  -4    1.31    0.29
  -2 -13   4    0.57    0.26
   2 -13  -4    0.55    0.26
  -2  13   4    0.31    0.21
   2  13  -4    0.21    0.23
   1 -13  -4   -0.06    0.22
  -1 -13   4   -0.27    0.22
   1  13  -4   -0.35    0.20
  -1  13   4   -0.15    0.19
   0 -13   4    0.20    0.24
   0 -13  -4    0.71    0.26
   0  13   4    0.05    0.21
   0  13  -4    0.17    0.22
   1 -13   4   -0.21    0.23
  -1 -13  -4   -0.26    0.22
  -1  13  -4   -0.06    0.21
   1  13   4   -0.23    0.19
   1  13   4   -0.35    0.19
   2 -13   4    0.38    0.25
   2  13   4    0.22    0.24
  -2  13  -4   -0.07    0.22
   2  13   4    0.33    0.23
   3 -13   4   -0.04    0.22
  -3  13  -4   -0.01    0.20
   3  13   4   -0.09    0.18
   3  13   4    0.16    0.24
   4 -13   4    2.10    0.34
   4  13   4    2.80    0.35
  -4  13  -4    2.30    0.31
   4  13   4    2.51    0.36
   5 -13   4    0.12    0.24
   5  13   4    0.04    0.23
   5  13   4    0.03    0.23
  -5  13  -4   -0.01    0.19
   6 -13   4    0.05    0.24
   6  13   4    0.29    0.26
  -6  13  -4    0.05    0.19
   6  13   4    0.33    0.28
   7 -13   4    0.24    0.26
   7  13   4    0.12    0.22
  -5 -14   4    0.61    0.30
   5 -14  -4    0.51    0.31
  -5  14   4    0.25    0.22
  -4 -14   4    0.20    0.25
   4 -14  -4   -0.21    0.25
  -4  14   4   -0.05    0.20
  -3 -14   4    1.38    0.33
   3 -14  -4    0.96    0.31
  -3  14   4    1.24    0.27
   2 -14  -4    0.36    0.24
  -2 -14   4    0.42    0.28
   2  14  -4    0.07    0.34
  -2  14   4    0.77    0.26
   1 -14  -4    0.30    0.25
  -1 -14   4    0.19    0.24
   1  14  -4   -0.02    0.23
  -1  14   4    0.09    0.23
   0 -14   4    2.27    0.36
   0 -14  -4    2.32    0.40
   0  14   4    1.98    0.30
   0  14  -4    1.82    0.33
   1 -14   4    0.53    0.30
   1  14   4    0.74    0.33
  -1  14  -4    0.62    0.23
   2 -14   4    2.90    0.40
  -2  14  -4    2.35    0.33
   2  14   4    2.49    0.37
   3 -14   4   -0.16    0.21
   3  14   4    0.02    0.23
  -3  14  -4   -0.05    0.21
  22   0  -5    0.04    0.24
  21   0  -5    0.25    0.22
  20   0  -5    0.25    0.19
  19   0  -5    1.66    0.28
  18   0  -5    0.23    0.17
  17   0  -5   -0.03    0.16
  16   0  -5   -0.02    0.15
 -15   0   5    8.05    0.36
  15   0  -5    8.71    0.40
 -14   0   5   -0.08    0.11
  14   0  -5    0.15    0.12
 -13   0   5   29.26    0.75
  13   0  -5   29.14    0.76
 -12   0   5    0.02    0.10
  12   0  -5    0.00    0.11
  11   0  -5    3.28    0.10
  11   0  -5    3.27    0.10
 -11   0   5    3.45    0.21
  11   0  -5    3.09    0.23
  10   0  -5   -0.06    0.03
 -10   0   5    0.06    0.09
  10   0  -5   -0.03    0.08
  -9   0   5   76.99    1.57
   9   0  -5   76.96    1.45
   9   0  -5   73.29    1.57
   8   0  -5   -0.07    0.07
  -8   0   5    0.05    0.08
   8   0  -5   -0.04    0.04
  -7   0   5   67.53    1.38
   7   0  -5   67.54    1.30
   7   0  -5   67.30    1.39
   6   0  -5    0.05    0.08
  -6   0   5   -0.02    0.07
   6   0  -5   -0.01    0.04
  -5   0   5    5.78    0.20
   5   0  -5    6.11    0.17
   5   0  -5    6.15    0.21
   4   0  -5   -0.02    0.04
  -4   0   5   -0.10    0.06
   4   0  -5    0.02    0.06
  -3   0   5   60.68    1.20
   3   0  -5   60.20    1.20
  -3   0   5   60.00    1.19
   3   0  -5   61.00    1.19
   2   0  -5    0.00    0.05
   2   0  -5   -0.08    0.05
  -2   0   5    0.00    0.06
  -2   0   5   -0.01    0.05
  -2   0   5   -0.07    0.05
  -1   0   5  261.99    4.96
   1   0  -5  267.65    4.97
  -1   0   5  261.48    4.94
  -1   0   5  266.74    4.96
   1   0  -5  258.02    4.95
   0   0   5   -0.21    0.07
   0   0   5   -0.23    0.03
   0   0  -5   -0.23    0.06
   0   0  -5   -0.14    0.03
   1   0   5  708.64   14.22
   1   0   5  791.41   14.52
  -1   0  -5  779.51   14.44
   2   0   5    0.10    0.07
   2   0   5   -0.02    0.06
  -2   0  -5   -0.02    0.04
  -3   0  -5    0.00    0.05
   3   0   5    0.08    0.06
   3   0   5   -0.07    0.07
   4   0   5   -0.02    0.06
   4   0   5   -0.01    0.03
   4   0   5    0.00    0.03
  -4   0  -5    0.00    0.06
   4   0   5   -0.06    0.06
   5   0   5   11.44    0.31
   5   0   5   11.22    0.33
   5   0   5   11.36    0.25
   5   0   5   11.49    0.25
   6   0   5    0.04    0.07
   6   0   5    0.02    0.04
   6   0   5   -0.02    0.04
   7   0   5    5.35    0.17
   7   0   5    5.70    0.17
   7   0   5    5.30    0.21
   8   0   5    0.02    0.06
   8   0   5    0.07    0.05
   8   0   5   -0.03    0.05
  -8   0  -5    0.01    0.04
   9   0   5    0.08    0.06
   9   0   5   -0.02    0.07
   9   0   5    0.18    0.08
  -9   0  -5    0.05    0.05
  10   0   5    0.00    0.07
  10   0   5    0.01    0.07
 -10   0  -5    0.03    0.06
  11   0   5    0.32    0.10
  11   0   5    0.40    0.10
 -11   0  -5    0.16    0.08
 -12   0  -5   -0.03    0.08
  12   0   5    0.00    0.10
  12   0   5    0.18    0.09
 -13   0  -5    6.04    0.26
  13   0   5    5.72    0.25
  13   0   5    6.46    0.28
 -14   0  -5   -0.16    0.08
  14   0   5   -0.02    0.11
 -15   0  -5    0.07    0.10
  15   0   5   -0.11    0.11
 -16   0  -5   -0.19    0.10
  16   0   5   -0.08    0.13
  17   0   5    0.15    0.14
  18   0   5    0.17    0.16
  19   0   5    0.17    0.16
  22  -1  -5    1.14    0.28
  22   1  -5    0.90    0.27
  21  -1  -5    0.33    0.22
  21   1  -5    0.35    0.24
  20  -1  -5    0.32    0.21
  20   1  -5    0.37    0.23
  19  -1  -5   -0.03    0.18
  19   1  -5    0.52    0.22
  18  -1  -5    0.65    0.20
  18   1  -5    0.42    0.19
  17  -1  -5    0.36    0.17
  17   1  -5    0.58    0.19
  16  -1  -5    1.98    0.23
  16   1  -5    1.84    0.23
  15  -1  -5    0.14    0.13
 -15  -1   5    0.11    0.12
 -15   1   5    0.11    0.14
  15   1  -5    0.34    0.17
  14  -1  -5    0.51    0.16
 -14  -1   5    0.74    0.15
  14   1  -5    0.75    0.18
 -14   1   5    0.86    0.16
  14   1  -5    0.81    0.10
 -13  -1   5    1.64    0.17
  13  -1  -5    1.81    0.20
  13   1  -5    1.85    0.22
 -13   1   5    1.91    0.20
  13   1  -5    1.83    0.11
 -12  -1   5    1.97    0.18
  12  -1  -5    2.14    0.21
 -12   1   5    2.10    0.19
  12   1  -5    2.10    0.21
  12   1  -5    2.13    0.12
  11  -1  -5   25.43    0.67
 -11  -1   5   25.02    0.65
  11   1  -5   25.23    0.55
  11   1  -5   25.76    0.67
 -11   1   5   26.18    0.65
 -10  -1   5    0.28    0.10
  10  -1  -5    0.30    0.12
  10   1  -5    0.27    0.10
 -10   1   5    0.17    0.08
  -9  -1   5   11.70    0.36
   9  -1  -5   12.37    0.38
  -9   1   5   12.59    0.37
   9   1  -5   11.33    0.37
  -8  -1   5    2.50    0.17
   8  -1  -5    2.07    0.15
   8  -1  -5    2.26    0.08
   8   1  -5    2.47    0.18
  -8   1   5    2.17    0.15
  -7  -1   5    0.62    0.11
   7  -1  -5    0.53    0.05
   7  -1  -5    0.44    0.09
   7   1  -5    0.44    0.10
  -7   1   5    0.62    0.11
   6  -1  -5   10.27    0.24
   6  -1  -5   10.74    0.31
  -6  -1   5   10.44    0.31
   6   1  -5   10.55    0.31
  -6   1   5   10.54    0.24
  -6   1   5   10.32    0.31
  -5  -1   5   62.75    1.30
   5  -1  -5   63.70    1.30
   5  -1  -5   66.15    1.25
  -5   1   5   63.67    1.30
  -5   1   5   66.91    1.25
   5   1  -5   63.00    1.30
   5   1  -5   65.31    1.29
   4  -1  -5    7.59    0.20
  -4  -1   5    7.42    0.23
   4  -1  -5    7.52    0.23
  -4   1   5    7.57    0.23
   4   1  -5    7.57    0.23
  -4   1   5    7.66    0.20
   4   1  -5    7.71    0.22
   3  -1  -5    1.83    0.12
  -3  -1   5    1.81    0.11
   3  -1  -5    1.97    0.11
  -3   1   5    1.79    0.10
   3   1  -5    1.74    0.11
  -3   1   5    1.58    0.11
   2  -1  -5   66.53    1.31
  -2  -1   5   66.91    1.31
   2  -1  -5   67.56    1.31
  -2  -1   5   67.68    1.31
   2   1  -5   67.31    1.31
   2   1  -5   67.65    1.32
  -2   1   5   66.40    1.32
  -1  -1   5  379.57    7.02
  -1  -1   5  357.31    7.01
   1  -1  -5  363.68    6.98
   1  -1  -5  372.52    6.99
  -1   1   5  372.66    6.96
   1   1  -5  366.93    7.01
  -1   1   5  363.54    7.06
   1   1  -5  369.75    7.03
   0  -1  -5  449.91    8.50
   0  -1   5  450.15    8.63
   0  -1  -5  452.16    8.46
   0  -1   5  442.37    8.47
   0   1  -5  455.94    8.43
   0   1  -5  434.14    8.53
   0   1   5  446.43    8.62
  -1  -1  -5    4.20    0.16
   1  -1   5    4.14    0.11
  -1  -1  -5    4.11    0.11
   1  -1   5    4.15    0.11
   1   1   5    4.15    0.12
   1   1   5    3.74    0.16
  -1   1  -5    3.92    0.15
  -2  -1  -5    0.20    0.06
   2  -1   5    0.07    0.02
   2  -1   5    0.09    0.08
   2  -1   5    0.10    0.06
   2  -1   5    0.08    0.02
  -2   1  -5    0.08    0.05
   2   1   5    0.04    0.04
   2   1   5    0.04    0.06
   2   1   5    0.08    0.04
   2   1   5    0.00    0.06
   3  -1   5    0.15    0.06
   3  -1   5    0.07    0.07
   3  -1   5    0.18    0.03
  -3  -1  -5    0.14    0.06
   3   1   5    0.11    0.04
   3   1   5    0.14    0.07
   3   1   5    0.27    0.07
   3   1   5    0.15    0.04
  -3   1  -5    0.22    0.05
   4  -1   5   30.16    0.58
   4  -1   5   29.56    0.58
   4  -1   5   29.45    0.65
   4  -1   5   29.52    0.67
   4   1   5   30.06    0.65
  -4   1  -5   30.35    0.65
   4   1   5   29.33    0.66
   4   1   5   29.88    0.60
   4   1   5   29.51    0.60
   5  -1   5   12.32    0.37
   5  -1   5   12.52    0.28
   5  -1   5   12.75    0.28
   5  -1   5   12.81    0.33
   5   1   5   12.77    0.35
   5   1   5   12.82    0.30
   5   1   5   12.64    0.29
   5   1   5   12.99    0.34
   6  -1   5    0.37    0.05
   6  -1   5    0.32    0.08
   6  -1   5    0.39    0.06
   6   1   5    0.25    0.05
   6   1   5    0.26    0.08
   6   1   5    0.22    0.08
   6   1   5    0.34    0.06
   7  -1   5    3.42    0.16
   7  -1   5    3.36    0.13
   7  -1   5    3.28    0.13
  -7   1  -5    3.38    0.10
   7   1   5    3.76    0.15
   7   1   5    3.16    0.17
   7   1   5    3.48    0.14
   8  -1   5    0.79    0.10
   8  -1   5    0.89    0.08
   8  -1   5    0.95    0.09
  -8  -1  -5    0.83    0.08
   8   1   5    0.84    0.08
  -8   1  -5    1.01    0.08
   8   1   5    1.00    0.10
   8   1   5    0.97    0.11
  -9  -1  -5    4.25    0.17
   9  -1   5    4.20    0.19
   9  -1   5    4.49    0.17
   9  -1   5    4.37    0.18
   9   1   5    3.80    0.19
  -9   1  -5    4.15    0.15
   9   1   5    4.04    0.18
  10  -1   5    3.37    0.17
  10  -1   5    3.47    0.18
 -10  -1  -5    3.48    0.17
  10   1   5    3.24    0.19
 -10   1  -5    3.61    0.16
  10   1   5    3.35    0.19
  11  -1   5    0.07    0.09
 -11  -1  -5    0.02    0.08
  11  -1   5    0.04    0.08
 -11   1  -5    0.07    0.07
  11   1   5    0.07    0.10
  11   1   5    0.05    0.09
  12  -1   5    4.05    0.22
 -12  -1  -5    3.69    0.21
  12  -1   5    3.58    0.20
  12   1   5    3.68    0.22
 -12   1  -5    3.92    0.20
  12   1   5    3.91    0.23
 -13  -1  -5   13.05    0.40
  13  -1   5   13.08    0.40
 -13   1  -5   12.28    0.38
  13   1   5   13.90    0.43
  13   1   5   12.68    0.39
 -14  -1  -5    2.19    0.19
  14  -1   5    2.11    0.20
  14   1   5    2.31    0.20
 -15  -1  -5    0.30    0.12
  15  -1   5    0.07    0.12
  15   1   5    0.30    0.14
  16  -1   5    0.34    0.14
 -16  -1  -5    0.27    0.13
  16   1   5    0.17    0.14
  17  -1   5    0.01    0.13
 -17  -1  -5    0.00    0.12
  17   1   5   -0.10    0.13
 -18  -1  -5    0.40    0.16
  18  -1   5    0.27    0.17
  18   1   5    0.57    0.18
  19  -1   5    0.36    0.17
  19   1   5    0.15    0.16
  22  -2  -5    0.46    0.25
  22   2  -5    1.14    0.29
  21  -2  -5   -0.09    0.23
  21   2  -5    0.02    0.21
  20  -2  -5   -0.03    0.20
  20   2  -5    0.19    0.21
  19  -2  -5    0.24    0.20
  19   2  -5   -0.08    0.19
  18  -2  -5    0.73    0.21
  18   2  -5    0.48    0.19
  17  -2  -5    3.22    0.30
  17   2  -5    3.12    0.30
  16  -2  -5    1.13    0.21
  16   2  -5    0.55    0.17
  15  -2  -5    0.26    0.15
 -15  -2   5    0.11    0.13
  15   2  -5    0.22    0.16
  14  -2  -5   25.83    0.74
 -14  -2   5   26.86    0.72
 -14  -2   5   28.35    0.73
  14   2  -5   26.91    0.75
  14   2  -5   26.86    0.61
 -14   2   5   26.93    0.72
 -13  -2   5    0.25    0.13
 -13  -2   5    0.27    0.11
  13  -2  -5    0.30    0.15
 -13   2   5    0.39    0.12
  13   2  -5    0.20    0.08
  13   2  -5    0.23    0.15
  12  -2  -5    3.96    0.26
 -12  -2   5    4.18    0.24
 -12  -2   5    4.49    0.24
  12   2  -5    4.52    0.18
 -12   2   5    4.46    0.25
  12   2  -5    3.32    0.24
 -11  -2   5    2.40    0.19
 -11  -2   5    2.47    0.20
  11  -2  -5    2.14    0.20
  11   2  -5    2.54    0.22
 -11   2   5    2.49    0.18
 -10  -2   5    0.04    0.08
 -10  -2   5    0.02    0.08
  10  -2  -5    0.14    0.10
  10   2  -5    0.26    0.10
 -10   2   5    0.14    0.10
  -9  -2   5    2.81    0.18
   9  -2  -5    3.08    0.20
  -9  -2   5    2.81    0.18
  -9   2   5    3.30    0.19
   9   2  -5    2.90    0.19
  -8  -2   5    2.03    0.15
  -8  -2   5    1.82    0.15
   8  -2  -5    1.99    0.17
  -8   2   5    2.08    0.15
   8   2  -5    2.04    0.17
  -7  -2   5   25.02    0.60
   7  -2  -5   25.31    0.51
   7  -2  -5   25.40    0.61
  -7  -2   5   25.29    0.59
  -7   2   5   24.94    0.51
  -7   2   5   26.10    0.61
   7   2  -5   25.28    0.61
   6  -2  -5   10.18    0.24
   6  -2  -5   10.54    0.31
  -6  -2   5    9.89    0.29
  -6  -2   5   10.49    0.31
  -6   2   5   10.01    0.31
  -6   2   5   10.27    0.24
   6   2  -5   10.13    0.31
   5  -2  -5   26.50    0.55
  -5  -2   5   27.14    0.61
   5  -2  -5   26.08    0.60
  -5   2   5   26.59    0.60
  -5   2   5   26.77    0.55
   5   2  -5   24.55    0.59
   5   2  -5   26.34    0.58
   4  -2  -5    9.48    0.24
   4  -2  -5    9.17    0.27
  -4  -2   5    8.76    0.25
  -4  -2   5    9.48    0.28
   4   2  -5    9.64    0.28
  -4   2   5    9.46    0.24
   4   2  -5   10.06    0.26
  -4   2   5    9.58    0.28
   3  -2  -5   72.47    1.40
   3  -2  -5   69.80    1.42
  -3  -2   5   71.30    1.40
  -3  -2   5   71.07    1.42
  -3   2   5   70.30    1.40
   3   2  -5   71.88    1.41
   3   2  -5   73.30    1.42
  -2  -2   5    9.62    0.25
   2  -2  -5    9.23    0.26
   2  -2  -5    9.54    0.25
   2   2  -5    9.45    0.25
  -2   2   5    9.50    0.26
   2   2  -5    9.30    0.24
   1  -2  -5    4.93    0.17
  -1  -2   5    5.47    0.17
  -1  -2   5    4.89    0.16
   1  -2  -5    5.24    0.17
   1   2  -5    5.26    0.16
  -1   2   5    5.33    0.18
   1   2  -5    5.11    0.15
   0  -2   5   12.28    0.28
   0  -2   5   12.09    0.32
   0  -2  -5   11.78    0.31
   0  -2   5   11.69    0.28
   0  -2  -5   12.06    0.29
   0   2   5   11.30    0.29
   0   2  -5   11.93    0.26
   0   2   5   11.94    0.29
   0   2   5   12.30    0.32
   0   2  -5   12.26    0.28
  -1  -2  -5   15.53    0.39
   1  -2   5   16.14    0.39
  -1  -2  -5   15.66    0.35
   1  -2   5   15.39    0.35
  -1   2  -5   15.93    0.32
  -1   2  -5   16.06    0.33
   1   2   5   16.22    0.36
   1   2   5   15.49    0.39
   1   2   5   16.08    0.36
  -1   2  -5   15.26    0.38
   2  -2   5    3.47    0.11
   2  -2   5    3.62    0.18
   2  -2   5    3.45    0.12
  -2  -2  -5    3.32    0.12
   2   2   5    3.57    0.14
  -2   2  -5    3.53    0.15
   2   2   5    3.56    0.13
   3  -2   5    0.01    0.08
   3  -2   5    0.00    0.04
  -3  -2  -5   -0.05    0.04
   3  -2   5    0.02    0.04
   3   2   5   -0.14    0.05
  -3   2  -5    0.03    0.06
   3   2   5   -0.07    0.07
   3   2   5   -0.08    0.03
   3   2   5   -0.04    0.05
   4  -2   5    0.30    0.10
   4  -2   5    0.28    0.05
  -4  -2  -5    0.31    0.05
   4   2   5    0.28    0.09
   4   2   5    0.34    0.07
   4   2   5    0.29    0.07
   5  -2   5    0.07    0.05
  -5  -2  -5    0.01    0.05
   5   2   5    0.08    0.07
   5   2   5    0.09    0.06
   5   2   5   -0.02    0.06
   6  -2   5   27.74    0.58
   6   2   5   27.05    0.60
   6   2   5   26.99    0.63
   6   2   5   26.62    0.60
  -6   2  -5   27.34    0.54
   7  -2   5    0.65    0.08
   7   2   5    0.62    0.10
  -7   2  -5    0.68    0.06
   7   2   5    0.63    0.09
   8  -2   5    8.70    0.25
   8   2   5    9.50    0.31
  -8   2  -5    8.95    0.23
   8   2   5    7.42    0.25
   8   2   5    9.16    0.28
   9  -2   5    7.45    0.24
  -9  -2  -5    7.47    0.24
   9   2   5    7.74    0.26
  -9   2  -5    7.46    0.22
   9   2   5    6.59    0.27
   9   2   5    6.95    0.24
  10  -2   5    0.14    0.08
 -10  -2  -5    0.20    0.08
  10   2   5    0.16    0.10
  10   2   5    0.13    0.09
  11  -2   5    7.32    0.27
 -11  -2  -5    6.96    0.27
  11   2   5    7.53    0.29
  11   2   5    7.32    0.29
 -12  -2  -5    1.36    0.15
  12  -2   5    1.65    0.16
  12   2   5    1.62    0.17
  12   2   5    1.76    0.17
 -13  -2  -5    0.71    0.13
  13  -2   5    0.59    0.13
  13   2   5    0.72    0.14
  13   2   5    0.76    0.13
  14  -2   5    4.53    0.26
 -14  -2  -5    4.67    0.26
  14   2   5    4.77    0.27
  14   2   5    4.82    0.25
  15  -2   5    3.06    0.25
 -15  -2  -5    2.82    0.23
  15   2   5    3.15    0.26
  16  -2   5    0.23    0.14
 -16  -2  -5   -0.01    0.12
  16   2   5    0.17    0.14
  17  -2   5   -0.17    0.13
 -17  -2  -5   -0.20    0.12
  17   2   5   -0.12    0.14
 -18  -2  -5    0.11    0.14
  18  -2   5   -0.15    0.14
  18   2   5    0.12    0.16
  19  -2   5    0.15    0.17
 -19  -2  -5    0.16    0.15
  19   2   5   -0.01    0.16
  21  -3  -5    1.28    0.28
  21   3  -5    0.92    0.27
  20  -3  -5    1.73    0.29
  20   3  -5    1.67    0.30
  19  -3  -5    3.77    0.36
  19   3  -5    3.35    0.35
  18  -3  -5    0.67    0.22
  18   3  -5    0.74    0.22
  17  -3  -5    0.64    0.20
  17   3  -5    0.60    0.19
 -16  -3   5    0.45    0.17
  16  -3  -5    0.49    0.19
  16   3  -5    0.61    0.19
  15  -3  -5    7.59    0.39
 -15  -3   5    7.65    0.36
 -15  -3   5    7.45    0.36
  15   3  -5    7.03    0.39
  15   3  -5    6.63    0.27
 -14  -3   5    0.08    0.13
 -14  -3   5    0.26    0.13
  14  -3  -5    0.33    0.15
  14   3  -5    0.71    0.11
 -14   3   5    0.29    0.14
  14   3  -5    0.41    0.16
 -13  -3   5    0.17    0.12
  13  -3  -5    0.30    0.14
 -13  -3   5    0.17    0.13
 -13   3   5    0.21    0.13
  13   3  -5    0.48    0.16
  13   3  -5    0.21    0.10
 -12  -3   5    9.58    0.36
  12  -3  -5    9.12    0.38
 -12  -3   5    9.19    0.35
  12   3  -5    9.09    0.30
 -12   3   5    8.53    0.35
  12   3  -5    8.97    0.38
  11  -3  -5    0.15    0.12
 -11  -3   5    0.27    0.12
 -11  -3   5    0.24    0.10
 -11   3   5    0.20    0.10
  11   3  -5    0.31    0.13
  10  -3  -5   11.35    0.39
 -10  -3   5   11.34    0.37
 -10  -3   5   11.70    0.39
 -10   3   5   12.03    0.39
  10   3  -5   12.27    0.41
   9  -3  -5    0.14    0.09
  -9  -3   5    0.12    0.08
  -9  -3   5    0.04    0.09
  -9   3   5    0.05    0.03
   9   3  -5    0.11    0.09
  -9   3   5    0.11    0.10
  -8  -3   5    5.51    0.25
  -8  -3   5    5.37    0.23
   8  -3  -5    4.95    0.23
  -8   3   5    5.20    0.24
   8   3  -5    5.28    0.24
  -8   3   5    5.29    0.15
  -7  -3   5    4.72    0.22
  -7  -3   5    4.89    0.21
   7  -3  -5    4.97    0.23
  -7   3   5    4.80    0.15
  -7   3   5    5.05    0.23
   7   3  -5    4.96    0.22
   6  -3  -5   66.65    1.38
   6  -3  -5   66.81    1.30
  -6  -3   5   67.93    1.36
  -6  -3   5   65.56    1.38
   6   3  -5   66.65    1.38
  -6   3   5   66.74    1.30
  -6   3   5   65.47    1.37
   5  -3  -5   16.24    0.43
   5  -3  -5   15.94    0.37
  -5  -3   5   14.99    0.41
   5   3  -5   15.84    0.42
  -5   3   5   15.81    0.37
   5   3  -5   15.96    0.44
  -4  -3   5    9.07    0.28
  -4  -3   5    8.85    0.26
   4  -3  -5    8.61    0.25
   4  -3  -5    9.44    0.29
   4   3  -5    9.12    0.27
   4   3  -5    9.08    0.28
  -4   3   5    8.67    0.25
   3  -3  -5    0.15    0.08
   3  -3  -5    0.01    0.05
  -3  -3   5   -0.02    0.06
  -3   3   5   -0.03    0.06
   3   3  -5    0.08    0.05
   3   3  -5   -0.03    0.06
   2  -3  -5   10.08    0.29
   2  -3  -5   10.34    0.28
  -2  -3   5   10.34    0.28
  -2  -3   5   10.17    0.28
  -2   3   5   10.11    0.28
   2   3  -5   10.77    0.29
   2   3  -5   10.17    0.27
  -1  -3   5    4.40    0.18
   1  -3  -5    4.36    0.18
  -1  -3   5    4.77    0.18
   1   3  -5    4.63    0.16
  -1   3   5    4.57    0.18
   1   3  -5    4.78    0.17
   0  -3   5    3.88    0.17
   0  -3  -5    3.58    0.15
   0  -3   5    3.61    0.15
   0  -3   5    3.71    0.15
   0   3  -5    3.77    0.14
   0   3   5    3.66    0.17
   0   3  -5    3.39    0.13
   0   3   5    3.80    0.16
   1  -3   5    8.35    0.27
   1  -3   5    8.62    0.24
  -1  -3  -5    8.94    0.25
   1  -3   5    8.57    0.24
  -1   3  -5    8.75    0.23
  -1   3  -5    8.37    0.22
   1   3   5    8.84    0.26
   1   3   5    8.83    0.27
   2  -3   5    0.27    0.08
   2  -3   5    0.25    0.07
   2  -3   5    0.26    0.06
  -2  -3  -5    0.31    0.07
   2   3   5    0.19    0.08
   2   3   5    0.31    0.08
  -2   3  -5    0.38    0.05
   3  -3   5   16.40    0.37
  -3  -3  -5   15.67    0.38
   3  -3   5   15.37    0.43
   3   3   5   16.09    0.39
   3   3   5   15.76    0.39
  -3   3  -5   15.63    0.35
   3   3   5   15.55    0.42
   4  -3   5    6.69    0.26
   4  -3   5    7.09    0.21
  -4  -3  -5    6.78    0.21
   4   3   5    6.86    0.25
   4   3   5    7.62    0.24
   4   3   5    6.64    0.20
  -4   3  -5    6.61    0.18
   4   3   5    6.93    0.22
   5  -3   5   13.53    0.33
  -5  -3  -5   12.84    0.33
   5   3   5   13.21    0.32
   5   3   5   13.79    0.36
   5   3   5   12.71    0.35
   5   3   5   12.74    0.38
  -6  -3  -5    0.91    0.09
   6  -3   5    0.85    0.09
   6   3   5    0.97    0.09
   6   3   5    0.78    0.09
   6   3   5    1.05    0.12
   6   3   5    1.07    0.11
   7  -3   5    3.96    0.17
  -7  -3  -5    3.56    0.15
   7   3   5    3.61    0.19
   7   3   5    3.66    0.21
   7   3   5    3.56    0.17
   8  -3   5    2.74    0.16
  -8  -3  -5    2.46    0.14
   8   3   5    2.72    0.18
   8   3   5    2.44    0.19
   8   3   5    2.60    0.15
   9  -3   5   13.56    0.37
  -9  -3  -5   13.68    0.38
   9   3   5   13.84    0.42
   9   3   5   12.84    0.39
 -10  -3  -5    5.11    0.24
  10  -3   5    6.01    0.24
  10   3   5    6.30    0.27
  10   3   5    5.56    0.27
  11  -3   5    0.22    0.11
 -11  -3  -5    0.55    0.12
  11   3   5    0.52    0.13
  11   3   5    0.33    0.12
  12  -3   5    6.35    0.28
 -12  -3  -5    5.95    0.28
  12   3   5    6.26    0.30
  12   3   5    5.97    0.29
 -13  -3  -5    1.75    0.17
  13  -3   5    2.05    0.19
  13   3   5    1.66    0.18
  13   3   5    1.64    0.19
  14  -3   5    0.15    0.13
 -14  -3  -5    0.06    0.11
  14   3   5    0.23    0.12
  14   3   5    0.16    0.13
  15  -3   5   -0.02    0.12
 -15  -3  -5   -0.11    0.11
  15   3   5    0.16    0.14
  16  -3   5    1.06    0.18
 -16  -3  -5    0.67    0.15
  16   3   5    0.86    0.18
 -17  -3  -5   -0.16    0.13
  17  -3   5    0.35    0.16
  17   3   5   -0.11    0.15
 -18  -3  -5    1.96    0.24
  18  -3   5    1.73    0.23
  18   3   5    1.70    0.24
  19  -3   5    0.49    0.19
 -19  -3  -5    0.22    0.17
  19   3   5    0.40    0.19
  21  -4  -5   -0.08    0.20
  21   4  -5    0.09    0.23
  20  -4  -5    0.44    0.25
  20   4  -5    0.28    0.23
  19  -4  -5    0.01    0.20
  19   4  -5   -0.09    0.19
  18  -4  -5    0.38    0.22
  18   4  -5    0.09    0.19
  17  -4  -5    0.32    0.19
  17   4  -5    0.49    0.20
  16  -4  -5    0.41    0.18
  16   4  -5    0.76    0.20
  15  -4  -5   -0.06    0.15
  15   4  -5   -0.04    0.10
  15   4  -5    0.26    0.17
 -14  -4   5    0.03    0.12
 -14  -4   5    0.06    0.13
  14  -4  -5   -0.02    0.14
  14   4  -5    0.32    0.16
  14   4  -5    0.12    0.11
 -14   4   5   -0.06    0.12
 -13  -4   5    8.51    0.37
 -13  -4   5    8.85    0.38
  13  -4  -5    8.93    0.38
  13   4  -5    8.30    0.40
 -13   4   5    8.68    0.37
  13   4  -5    8.23    0.31
 -12  -4   5   22.99    0.65
  12  -4  -5   22.46    0.65
 -12  -4   5   22.79    0.63
  12   4  -5   22.39    0.66
 -12   4   5   23.04    0.64
  12   4  -5   22.65    0.59
 -11  -4   5    3.11    0.24
  11  -4  -5    3.47    0.24
 -11  -4   5    3.88    0.24
  11   4  -5    3.21    0.24
 -11   4   5    3.94    0.25
 -10  -4   5    0.16    0.12
 -10  -4   5   -0.01    0.09
  10  -4  -5    0.09    0.11
 -10   4   5    0.02    0.10
  10   4  -5    0.11    0.11
 -10   4   5    0.14    0.04
   9  -4  -5    0.46    0.13
  -9  -4   5    0.46    0.13
  -9  -4   5    0.60    0.11
  -9   4   5    0.61    0.13
   9   4  -5    0.57    0.13
  -9   4   5    0.56    0.06
  -8  -4   5    7.24    0.29
   8  -4  -5    8.00    0.31
  -8  -4   5    7.79    0.28
  -8   4   5    7.69    0.21
   8   4  -5    7.62    0.31
  -8   4   5    7.47    0.29
   7  -4  -5   -0.07    0.08
  -7  -4   5    0.02    0.06
  -7  -4   5    0.01    0.10
  -7   4   5    0.00    0.09
  -7   4   5   -0.04    0.05
   7   4  -5    0.05    0.10
  -6  -4   5   53.21    1.14
  -6  -4   5   55.33    1.17
   6  -4  -5   53.08    1.16
   6   4  -5   53.99    1.16
  -6   4   5   54.18    1.09
  -5  -4   5    4.40    0.22
   5  -4  -5    4.50    0.23
   5   4  -5    4.34    0.22
  -5   4   5    4.56    0.18
  -4  -4   5    0.66    0.11
  -4  -4   5    0.48    0.08
   4  -4  -5    0.62    0.11
   4   4  -5    0.65    0.10
  -4   4   5    0.63    0.09
   4   4  -5    0.55    0.09
   3  -4  -5   18.78    0.48
  -3  -4   5   19.42    0.45
  -3  -4   5   18.86    0.48
   3   4  -5   19.12    0.46
   3   4  -5   18.88    0.48
  -3   4   5   18.81    0.46
   2  -4  -5   23.30    0.56
  -2  -4   5   24.36    0.57
  -2  -4   5   22.86    0.53
  -2   4   5   22.96    0.55
   2   4  -5   23.10    0.55
   2   4  -5   24.01    0.54
  -1  -4   5   12.22    0.34
   1  -4  -5   12.11    0.34
  -1  -4   5   12.02    0.33
  -1   4   5   12.02    0.35
  -1   4   5   12.15    0.35
   1   4  -5   11.90    0.33
   1   4  -5   12.30    0.32
   0  -4   5    7.45    0.25
   0  -4   5    6.80    0.25
   0  -4  -5    7.14    0.25
   0   4   5    6.69    0.25
   0   4  -5    7.12    0.22
   0   4   5    7.31    0.25
   0   4  -5    7.36    0.24
   1  -4   5   15.86    0.43
   1  -4   5   16.45    0.41
  -1  -4  -5   16.29    0.42
   1   4   5   15.47    0.43
   1   4   5   16.47    0.43
  -1   4  -5   16.22    0.39
  -1   4  -5   16.59    0.40
   2  -4   5    1.46    0.12
   2  -4   5    1.29    0.13
  -2  -4  -5    1.48    0.12
   2  -4   5    1.23    0.12
  -2   4  -5    1.54    0.11
  -2   4  -5    1.43    0.11
   2   4   5    1.25    0.12
   2   4   5    1.75    0.15
   3  -4   5   27.93    0.62
   3  -4   5   27.60    0.68
  -3  -4  -5   27.88    0.63
   3  -4   5   29.03    0.64
   3   4   5   28.34    0.67
   3   4   5   28.40    0.65
   4  -4   5    3.02    0.16
  -4  -4  -5    2.58    0.15
   4  -4   5    2.74    0.14
   4   4   5    2.67    0.11
   4   4   5    2.86    0.17
   4   4   5    2.96    0.18
   5  -4   5    3.53    0.17
  -5  -4  -5    3.84    0.17
   5  -4   5    3.71    0.17
   5   4   5    3.84    0.14
   5   4   5    3.88    0.19
   5   4   5    3.88    0.21
  -5   4  -5    4.00    0.14
  -6  -4  -5    4.18    0.18
   6  -4   5    4.34    0.19
   6  -4   5    4.29    0.18
   6   4   5    4.82    0.24
   6   4   5    4.60    0.22
  -7  -4  -5    0.17    0.08
   7  -4   5    0.18    0.08
   7  -4   5    0.22    0.09
   7   4   5    0.31    0.11
   7   4   5    0.22    0.10
  -8  -4  -5    0.25    0.09
   8  -4   5    0.10    0.08
   8   4   5    0.26    0.12
   8   4   5    0.01    0.10
  -9  -4  -5    1.98    0.16
   9  -4   5    1.29    0.14
   9   4   5    1.46    0.18
   9   4   5    1.86    0.18
  10  -4   5    1.56    0.16
 -10  -4  -5    1.34    0.15
  10   4   5    1.40    0.17
  10   4   5    1.48    0.17
  11  -4   5    0.84    0.14
 -11  -4  -5    0.99    0.14
  11   4   5    0.86    0.15
  11   4   5    0.84    0.16
 -12  -4  -5    5.91    0.29
  12  -4   5    5.69    0.28
  12   4   5    5.77    0.30
  12   4   5    5.60    0.30
  13  -4   5    0.93    0.16
 -13  -4  -5    0.66    0.14
  13   4   5    0.91    0.17
  13   4   5    0.98    0.17
  14  -4   5   -0.08    0.12
 -14  -4  -5    0.09    0.12
  14   4   5    0.01    0.12
  14   4   5   -0.19    0.13
  15  -4   5    0.22    0.14
 -15  -4  -5    0.01    0.12
  15   4   5    0.32    0.16
  16  -4   5    0.12    0.15
 -16  -4  -5    0.09    0.13
  16   4   5    0.14    0.15
  17  -4   5   -0.29    0.14
 -17  -4  -5    0.01    0.14
  17   4   5    0.10    0.17
  18  -4   5    0.29    0.17
 -18  -4  -5    0.43    0.17
  18   4   5    0.18    0.18
  20  -5  -5    0.13    0.23
  20   5  -5    0.23    0.25
  19  -5  -5   -0.04    0.21
  19   5  -5   -0.11    0.20
  18  -5  -5    0.13    0.20
  18   5  -5    0.33    0.22
  17  -5  -5    0.17    0.17
  17   5  -5    0.14    0.17
  16  -5  -5   -0.01    0.17
  16   5  -5    0.19    0.18
  15  -5  -5    0.67    0.20
  15   5  -5    0.54    0.20
  15   5  -5    0.15    0.12
 -14  -5   5    0.18    0.15
  14  -5  -5   -0.03    0.15
  14   5  -5   -0.01    0.11
  14   5  -5   -0.12    0.13
 -13  -5   5    9.33    0.43
  13  -5  -5    7.99    0.40
 -13  -5   5    8.99    0.40
 -13   5   5    9.13    0.38
  13   5  -5    7.56    0.39
  13   5  -5    8.33    0.34
 -12  -5   5    3.05    0.26
 -12  -5   5    3.07    0.25
  12  -5  -5    2.65    0.25
  12   5  -5    2.83    0.27
  12   5  -5    2.93    0.22
 -12   5   5    2.79    0.24
 -11  -5   5    0.00    0.12
 -11  -5   5    0.24    0.11
  11  -5  -5    0.23    0.15
  11   5  -5    0.25    0.15
 -11   5   5    0.34    0.05
 -11   5   5    0.19    0.14
 -10  -5   5    3.45    0.23
  10  -5  -5    3.06    0.24
 -10  -5   5    3.06    0.23
 -10   5   5    3.82    0.25
 -10   5   5    3.18    0.14
  10   5  -5    3.23    0.25
  -9  -5   5    0.22    0.13
  -9  -5   5    0.27    0.09
   9  -5  -5    0.37    0.14
  -9   5   5    0.45    0.08
  -9   5   5    0.64    0.14
   9   5  -5    0.39    0.13
  -8  -5   5    8.63    0.34
   8  -5  -5    7.51    0.33
  -8  -5   5    8.22    0.31
  -8   5   5    8.35    0.25
   8   5  -5    8.65    0.35
  -8   5   5    8.68    0.33
   7  -5  -5    6.33    0.28
  -7  -5   5    6.21    0.26
  -7  -5   5    5.97    0.27
   7   5  -5    6.45    0.29
  -7   5   5    6.33    0.22
  -6  -5   5    0.42    0.12
   6  -5  -5    0.38    0.11
  -6  -5   5    0.33    0.09
  -6  -5   5    0.36    0.07
  -6   5   5    0.33    0.08
   6   5  -5    0.20    0.10
  -5  -5   5    0.08    0.09
   5  -5  -5    0.14    0.09
  -5  -5   5    0.00    0.02
  -5  -5   5    0.04    0.06
   5   5  -5    0.05    0.10
  -5   5   5    0.03    0.07
  -4  -5   5   26.31    0.63
  -4  -5   5   27.69    0.59
   4  -5  -5   28.46    0.67
  -4  -5   5   27.06    0.67
   4   5  -5   26.57    0.66
  -4   5   5   26.60    0.62
   4   5  -5   26.08    0.63
   3  -5  -5    8.24    0.30
  -3  -5   5    8.11    0.30
  -3  -5   5    8.26    0.25
   3   5  -5    8.37    0.28
   3   5  -5    8.72    0.30
  -3   5   5    8.35    0.28
  -2  -5   5   14.57    0.37
   2  -5  -5   14.15    0.41
  -2  -5   5   14.43    0.41
   2   5  -5   14.35    0.40
  -2   5   5   14.22    0.40
   2   5  -5   14.49    0.39
  -1  -5   5    2.79    0.18
   1  -5  -5    3.06    0.18
  -1  -5   5    3.03    0.17
   1   5  -5    3.10    0.18
   1   5  -5    2.73    0.16
  -1   5   5    2.85    0.18
  -1   5   5    3.12    0.20
   0  -5  -5    7.04    0.27
   0  -5   5    6.61    0.26
   0  -5   5    6.78    0.25
   0   5   5    7.56    0.27
   0   5   5    7.27    0.28
   0   5  -5    7.00    0.25
   1  -5   5    1.96    0.17
  -1  -5  -5    2.05    0.16
   1  -5   5    2.05    0.16
   1   5   5    1.89    0.16
  -1   5  -5    2.17    0.14
   1   5   5    2.14    0.16
  -2  -5  -5    5.27    0.22
   2  -5   5    5.21    0.22
  -2   5  -5    5.13    0.21
   2   5   5    5.12    0.24
   2   5   5    5.06    0.23
  -3  -5  -5    4.61    0.21
   3  -5   5    4.67    0.21
   3   5   5    4.71    0.23
   3   5   5    4.65    0.23
   4  -5   5   13.84    0.39
  -4  -5  -5   13.67    0.39
   4   5   5   12.87    0.41
   4   5   5   14.13    0.41
   4   5   5   13.67    0.30
  -5  -5  -5   10.30    0.33
   5  -5   5   10.27    0.33
   5   5   5   11.26    0.38
   5   5   5   10.71    0.36
   5   5   5   10.49    0.24
  -6  -5  -5    7.82    0.28
   6  -5   5    8.30    0.29
   6   5   5    8.22    0.32
   6   5   5    9.58    0.33
  -6   5  -5    8.06    0.25
   7  -5   5   36.73    0.84
  -7  -5  -5   35.93    0.83
   7   5   5   38.11    0.90
   7   5   5   38.07    0.88
   8  -5   5    1.74    0.17
   8   5   5    1.41    0.17
   8   5   5    1.62    0.19
   9  -5   5    0.11    0.11
  -9  -5  -5    0.01    0.10
   9   5   5    0.00    0.12
   9   5   5    0.02    0.12
  10  -5   5    7.74    0.32
 -10  -5  -5    7.77    0.32
  10   5   5    7.04    0.34
  10   5   5    7.70    0.35
  11  -5   5    7.37    0.32
 -11  -5  -5    6.68    0.32
  11   5   5    6.86    0.34
  11   5   5    6.85    0.34
  12  -5   5    0.40    0.14
 -12  -5  -5    0.56    0.14
  12   5   5    0.99    0.17
  12   5   5    0.40    0.15
  13  -5   5    5.84    0.31
 -13  -5  -5    5.95    0.32
  13   5   5    6.13    0.34
  13   5   5    6.26    0.35
 -14  -5  -5    2.18    0.22
  14  -5   5    1.82    0.21
  14   5   5    2.17    0.23
  14   5   5    2.00    0.23
 -15  -5  -5    0.10    0.13
  15  -5   5    0.01    0.14
  15   5   5    0.18    0.15
  15   5   5    0.11    0.16
  16  -5   5    1.42    0.22
 -16  -5  -5    1.14    0.20
  16   5   5    1.27    0.23
  17  -5   5    0.33    0.18
 -17  -5  -5    0.25    0.16
  17   5   5    0.02    0.17
 -18  -5  -5    0.96    0.21
  18  -5   5    0.41    0.19
  18   5   5    1.19    0.24
  20  -6  -5   -0.12    0.23
  20   6  -5    0.42    0.24
  19  -6  -5    0.42    0.24
  19   6  -5    0.16    0.21
  18  -6  -5    0.65    0.24
  18   6  -5    0.57    0.24
  17  -6  -5   -0.16    0.19
  17   6  -5    0.42    0.20
  16  -6  -5    0.34    0.18
  16   6  -5    0.23    0.14
  16   6  -5    0.22    0.18
  15  -6  -5    0.00    0.16
  15   6  -5   -0.14    0.17
  15   6  -5    0.10    0.13
  14  -6  -5   -0.13    0.15
 -14  -6   5   -0.03    0.14
  14   6  -5    0.26    0.14
  14   6  -5    0.02    0.15
  13  -6  -5    4.77    0.33
 -13  -6   5    4.01    0.29
  13   6  -5    4.51    0.35
 -13   6   5    4.11    0.43
  13   6  -5    4.41    0.28
  12  -6  -5    7.86    0.38
 -12  -6   5    7.84    0.39
  12   6  -5    8.06    0.39
  12   6  -5    7.83    0.35
 -12   6   5    8.07    0.38
 -11  -6   5    5.05    0.32
  11  -6  -5    4.47    0.32
  11   6  -5    5.12    0.34
 -11   6   5    4.63    0.18
 -11   6   5    4.37    0.29
  10  -6  -5   36.63    0.94
 -10  -6   5   37.13    0.92
 -10  -6   5   37.62    0.94
  10   6  -5   36.62    0.94
 -10   6   5   37.48    0.79
 -10   6   5   37.08    0.92
  -9  -6   5    4.74    0.16
  -9  -6   5    5.42    0.31
   9  -6  -5    4.46    0.28
  -9  -6   5    4.68    0.26
   9   6  -5    4.72    0.31
  -9   6   5    4.69    0.21
  -9   6   5    4.93    0.29
  -8  -6   5    6.25    0.31
   8  -6  -5    5.08    0.31
  -8  -6   5    5.77    0.28
  -8  -6   5    5.85    0.18
   8   6  -5    5.78    0.30
  -8   6   5    5.99    0.23
  -7  -6   5   57.43    1.27
  -7  -6   5   57.41    1.16
  -7  -6   5   57.37    1.30
   7  -6  -5   58.95    1.31
  -7   6   5   58.60    1.22
   7   6  -5   61.32    1.32
  -6  -6   5    4.34    0.25
  -6  -6   5    4.64    0.17
   6  -6  -5    4.30    0.25
  -6  -6   5    4.13    0.22
  -6   6   5    5.01    0.22
   6   6  -5    4.86    0.28
  -5  -6   5    0.61    0.08
   5  -6  -5    0.68    0.14
  -5  -6   5    0.54    0.13
  -5   6   5    0.59    0.11
   5   6  -5    0.49    0.13
  -4  -6   5    0.20    0.08
  -4  -6   5    0.36    0.12
  -4  -6   5    0.20    0.07
   4  -6  -5    0.02    0.10
   4   6  -5    0.23    0.10
  -4   6   5    0.12    0.09
   3  -6  -5    5.15    0.26
  -3  -6   5    4.90    0.25
  -3  -6   5    4.79    0.19
  -3   6   5    4.95    0.22
   3   6  -5    5.29    0.26
  -2  -6   5    1.84    0.18
   2  -6  -5    1.69    0.16
  -2  -6   5    1.48    0.13
   2   6  -5    1.56    0.15
  -2   6   5    1.28    0.13
   1  -6  -5    0.53    0.12
  -1  -6   5    0.36    0.09
  -1  -6   5    0.34    0.12
  -1   6   5    0.42    0.11
   1   6  -5    0.48    0.11
  -1   6   5    0.11    0.10
   0  -6  -5    1.66    0.17
   0  -6   5    1.68    0.17
   0   6  -5    1.65    0.15
   0   6   5    1.90    0.18
   0   6   5    1.58    0.16
   1  -6   5   18.87    0.51
  -1  -6  -5   18.17    0.50
  -1   6  -5   18.15    0.48
   1   6   5   17.86    0.51
   1   6   5   17.86    0.51
   2  -6   5    1.29    0.15
  -2  -6  -5    1.32    0.15
   2   6   5    1.32    0.16
  -2   6  -5    1.38    0.14
   2   6   5    0.98    0.14
   3  -6   5    0.97    0.14
  -3  -6  -5    0.78    0.12
   3   6   5    0.71    0.15
   3   6   5    0.99    0.14
   4  -6   5    0.29    0.11
  -4  -6  -5    0.36    0.11
   4   6   5    0.36    0.05
   4   6   5    0.27    0.12
   4   6   5    0.32    0.12
   5  -6   5    0.55    0.12
  -5  -6  -5    0.81    0.13
   5   6   5    0.56    0.14
   5   6   5    0.65    0.14
  -6  -6  -5    1.40    0.15
   6  -6   5    1.13    0.15
   6   6   5    1.26    0.17
   6   6   5    1.40    0.19
   7  -6   5    1.06    0.15
  -7  -6  -5    0.97    0.14
   7   6   5    0.92    0.16
   7   6   5    0.78    0.15
   8  -6   5    6.81    0.30
  -8  -6  -5    6.41    0.30
   8   6   5    6.22    0.31
   8   6   5    6.37    0.33
   9  -6   5    9.45    0.37
  -9  -6  -5    9.06    0.37
   9   6   5    9.46    0.40
   9   6   5    9.48    0.39
  10  -6   5    0.01    0.12
 -10  -6  -5   -0.03    0.12
  10   6   5    0.08    0.14
  10   6   5    0.02    0.14
  11  -6   5    7.60    0.35
 -11  -6  -5    7.74    0.35
  11   6   5    7.52    0.37
  11   6   5    7.03    0.36
 -12  -6  -5    0.11    0.12
  12  -6   5   -0.05    0.13
  12   6   5   -0.15    0.14
  12   6   5    0.08    0.15
 -13  -6  -5    1.15    0.18
  13  -6   5    1.29    0.20
  13   6   5    1.19    0.21
  13   6   5    1.09    0.19
  14  -6   5    0.17    0.16
 -14  -6  -5   -0.10    0.12
  14   6   5    0.18    0.17
  14   6   5    0.03    0.15
 -15  -6  -5   -0.16    0.13
  15  -6   5    0.00    0.15
  15   6   5    0.22    0.17
  15   6   5    0.07    0.16
 -16  -6  -5    1.83    0.24
  16  -6   5    2.00    0.24
  16   6   5    1.90    0.27
  17  -6   5    0.76    0.21
 -17  -6  -5    0.42    0.17
  17   6   5    0.63    0.21
  19  -7  -5    1.75    0.33
  19   7  -5    0.81    0.28
  18  -7  -5   -0.07    0.22
  18   7  -5    0.34    0.24
  17  -7  -5    0.21    0.21
  17   7  -5    0.26    0.22
  16  -7  -5    0.84    0.23
  16   7  -5    0.35    0.23
  16   7  -5    0.34    0.16
  15  -7  -5    0.00    0.16
  15   7  -5    0.18    0.21
  15   7  -5    0.05    0.14
  14  -7  -5    0.32    0.17
  14   7  -5    0.33    0.21
  14   7  -5    0.59    0.17
 -13  -7   5    0.20    0.15
  13  -7  -5    0.23    0.16
  13   7  -5   -0.02    0.13
  13   7  -5    0.37    0.19
 -12  -7   5    0.48    0.17
  12  -7  -5    0.25    0.15
  12   7  -5    0.46    0.16
  12   7  -5    0.69    0.20
 -12   7   5    0.18    0.14
  11  -7  -5    0.18    0.16
 -11  -7   5    0.06    0.14
  11   7  -5    0.33    0.18
  11   7  -5    0.31    0.15
 -11   7   5    0.20    0.15
 -10  -7   5    0.92    0.19
  10  -7  -5    1.17    0.21
 -10   7   5    1.25    0.18
  10   7  -5    1.44    0.23
 -10   7   5    1.14    0.13
   9  -7  -5    0.34    0.17
  -9  -7   5    0.13    0.15
   9   7  -5   -0.05    0.14
  -9   7   5    0.19    0.10
  -9   7   5    0.24    0.14
  -8  -7   5    3.82    0.30
  -8  -7   5    3.59    0.14
   8  -7  -5    3.85    0.28
  -8   7   5    4.03    0.22
   8   7  -5    4.64    0.32
  -7  -7   5    3.13    0.27
   7  -7  -5    2.71    0.24
  -7  -7   5    2.94    0.14
   7   7  -5    3.51    0.29
  -7   7   5    3.00    0.21
  -6  -7   5    0.00    0.12
   6  -7  -5    0.17    0.15
  -6  -7   5    0.08    0.07
   6   7  -5   -0.14    0.13
  -6   7   5    0.07    0.11
  -5  -7   5    1.56    0.20
   5  -7  -5    1.58    0.20
  -5  -7   5    1.26    0.11
   5   7  -5    1.10    0.17
  -5   7   5    1.46    0.16
   4  -7  -5    0.37    0.14
  -4  -7   5    0.35    0.14
   4   7  -5    0.55    0.15
  -4   7   5    0.45    0.12
   3  -7  -5   11.99    0.42
  -3  -7   5   12.76    0.43
  -3   7   5   12.16    0.40
   3   7  -5   11.31    0.40
   2  -7  -5    0.11    0.12
  -2  -7   5    0.18    0.11
  -2   7   5    0.05    0.11
   2   7  -5    0.00    0.11
   1  -7  -5   -0.10    0.10
  -1  -7   5    0.08    0.10
  -1   7   5    0.06    0.10
   1   7  -5    0.08    0.09
  -1   7   5   -0.17    0.09
   0  -7  -5    1.47    0.17
   0  -7   5    1.40    0.16
   0   7   5    1.15    0.16
   0   7  -5    1.59    0.17
   0   7   5    1.44    0.16
   1  -7   5    1.71    0.18
  -1  -7  -5    1.67    0.17
  -1   7  -5    2.25    0.19
   1   7   5    2.13    0.21
   1   7   5    2.15    0.21
   2  -7   5   -0.17    0.10
  -2  -7  -5    0.01    0.11
   2   7   5    0.15    0.12
  -2   7  -5    0.03    0.10
   2   7   5   -0.15    0.12
  -3  -7  -5   -0.02    0.11
   3  -7   5    0.26    0.12
   3   7   5    0.19    0.13
   3   7   5   -0.03    0.12
  -4  -7  -5    8.20    0.33
   4  -7   5    8.52    0.34
   4   7   5    8.23    0.36
   4   7   5    9.10    0.37
  -5  -7  -5   14.36    0.47
   5  -7   5   15.41    0.48
   5   7   5   14.76    0.50
   5   7   5   15.25    0.50
   6  -7   5    0.76    0.16
  -6  -7  -5    1.04    0.16
   6   7   5    0.87    0.17
   6   7   5    0.78    0.18
   7  -7   5   14.54    0.47
   7   7   5   14.13    0.51
   7   7   5   14.43    0.50
  -8  -7  -5    0.38    0.14
   8  -7   5    0.50    0.16
   8   7   5    0.87    0.17
   8   7   5    0.82    0.18
   9  -7   5   -0.18    0.13
  -9  -7  -5   -0.01    0.12
   9   7   5    0.19    0.15
   9   7   5    0.00    0.13
  10  -7   5    0.67    0.17
 -10  -7  -5    0.25    0.14
  10   7   5    0.23    0.16
  10   7   5    0.66    0.18
 -11  -7  -5    0.15    0.14
  11  -7   5    0.28    0.15
  11   7   5   -0.02    0.15
  11   7   5   -0.09    0.14
 -12  -7  -5    0.27    0.15
  12  -7   5    0.85    0.19
  12   7   5    0.61    0.17
  12   7   5    0.47    0.19
 -13  -7  -5    2.92    0.27
  13  -7   5    3.01    0.27
  13   7   5    2.88    0.29
  13   7   5    3.20    0.31
 -14  -7  -5    1.79    0.23
  14  -7   5    1.99    0.25
  14   7   5    1.82    0.24
  14   7   5    1.94    0.27
  15  -7   5    0.13    0.17
 -15  -7  -5    0.02    0.15
  15   7   5   -0.32    0.18
  15   7   5   -0.18    0.15
  16  -7   5    0.29    0.19
 -16  -7  -5    0.37    0.18
  16   7   5    0.54    0.22
  17  -7   5    1.43    0.26
  17   7   5    1.89    0.29
  18  -8  -5    0.29    0.25
  18   8  -5    0.49    0.27
  17  -8  -5    0.17    0.22
  17   8  -5    0.02    0.23
  16  -8  -5    0.28    0.20
  16   8  -5    0.24    0.22
  16   8  -5   -0.13    0.15
  15  -8  -5   -0.07    0.19
  15   8  -5    0.04    0.16
  15   8  -5   -0.04    0.21
  14  -8  -5    0.70    0.23
  14   8  -5    0.61    0.21
  14   8  -5    0.38    0.18
  13  -8  -5    0.18    0.20
 -13  -8   5    0.34    0.19
  13   8  -5   -0.06    0.19
  13   8  -5    0.37    0.16
 -12  -8   5    1.86    0.26
  12  -8  -5    2.14    0.28
  12   8  -5    1.85    0.23
  12   8  -5    1.80    0.27
  11  -8  -5    0.20    0.18
 -11  -8   5    0.04    0.16
  11   8  -5   -0.07    0.17
  11   8  -5   -0.31    0.14
 -11   8   5   -0.17    0.14
 -10  -8   5   10.04    0.46
  10  -8  -5    9.43    0.46
 -10   8   5    9.91    0.43
  10   8  -5   10.25    0.47
 -10   8   5    9.40    0.34
  -9  -8   5   16.84    0.58
   9  -8  -5   16.46    0.59
   9   8  -5   16.58    0.58
  -9   8   5   16.36    0.47
  -8  -8   5    0.63    0.18
   8  -8  -5    0.59    0.20
   8   8  -5    0.49    0.19
  -8   8   5    0.51    0.13
  -7  -8   5   39.24    1.00
   7  -8  -5   39.17    1.00
  -7   8   5   38.49    0.91
   7   8  -5   38.45    0.99
   6  -8  -5   38.30    0.98
  -6  -8   5   38.17    0.99
   6   8  -5   40.06    1.00
  -6   8   5   38.25    0.91
   5  -8  -5    2.36    0.24
  -5  -8   5    2.49    0.26
   5   8  -5    2.38    0.23
  -5   8   5    2.40    0.21
   4  -8  -5    0.22    0.16
  -4  -8   5    0.70    0.18
   4   8  -5    0.59    0.15
  -4   8   5    0.42    0.14
   3  -8  -5    0.18    0.13
  -3  -8   5    0.04    0.14
  -3   8   5    0.07    0.13
   3   8  -5   -0.06    0.13
   2  -8  -5    2.90    0.25
  -2  -8   5    3.27    0.27
  -2   8   5    3.09    0.25
   2   8  -5    2.93    0.25
   1  -8  -5    0.95    0.17
  -1  -8   5    0.72    0.17
   1   8  -5    0.99    0.17
  -1   8   5    0.70    0.15
  -1   8   5    0.88    0.18
   0  -8  -5    7.64    0.36
   0  -8   5    7.91    0.36
   0   8   5    7.85    0.35
   0   8  -5    7.82    0.34
   0   8   5    8.07    0.38
  -1  -8  -5    0.69    0.15
   1  -8   5    0.92    0.18
   1   8   5    1.02    0.17
   1   8   5    0.85    0.16
  -1   8  -5    0.87    0.15
   2  -8   5    1.16    0.18
  -2  -8  -5    1.09    0.17
   2   8   5    1.19    0.18
  -2   8  -5    1.21    0.17
   2   8   5    1.00    0.18
  -3  -8  -5    5.56    0.32
   3  -8   5    6.21    0.32
   3   8   5    5.29    0.33
   3   8   5    6.32    0.33
  -4  -8  -5    0.57    0.15
   4  -8   5    0.84    0.16
   4   8   5    0.75    0.19
   4   8   5    0.83    0.17
   5  -8   5    1.39    0.20
  -5  -8  -5    1.38    0.19
   5   8   5    1.17    0.19
   5   8   5    0.99    0.19
  -6  -8  -5    2.15    0.35
   6  -8   5    2.57    0.24
   6   8   5    2.15    0.24
   6   8   5    2.43    0.24
  -7  -8  -5    1.92    0.21
   7  -8   5    1.42    0.21
   7   8   5    1.11    0.20
   7   8   5    1.59    0.22
  -8  -8  -5    0.66    0.17
   8  -8   5    0.51    0.16
   8   8   5    0.63    0.19
   8   8   5    0.19    0.16
  -9  -8  -5    0.34    0.14
   9  -8   5    0.43    0.16
   9   8   5    0.26    0.17
   9   8   5    0.29    0.17
 -10  -8  -5    0.00    0.13
  10  -8   5    0.02    0.15
  10   8   5    0.00    0.15
  10   8   5   -0.08    0.15
  11  -8   5    1.56    0.22
 -11  -8  -5    1.22    0.20
  11   8   5    1.42    0.24
  11   8   5    1.37    0.24
  12  -8   5   -0.06    0.16
 -12  -8  -5    0.05    0.15
  12   8   5    0.32    0.19
  12   8   5   -0.12    0.15
 -13  -8  -5    0.00    0.14
  13  -8   5    0.26    0.18
  13   8   5   -0.01    0.17
  13   8   5    0.17    0.20
  14  -8   5   -0.21    0.17
  14   8   5   -0.02    0.20
  14   8   5   -0.19    0.16
  15  -8   5    0.01    0.18
  15   8   5   -0.01    0.17
  15   8   5   -0.10    0.19
  16  -8   5    0.50    0.22
  16   8   5    0.31    0.23
  17  -9  -5    0.49    0.26
  17   9  -5   -0.09    0.23
  16  -9  -5    0.23    0.23
  16   9  -5   -0.13    0.16
  16   9  -5    0.06    0.24
  15  -9  -5    0.23    0.22
  15   9  -5    0.06    0.17
  15   9  -5    0.22    0.24
  14  -9  -5    0.29    0.23
  14   9  -5   -0.17    0.17
  14   9  -5    0.20    0.22
  13  -9  -5    0.59    0.22
  13   9  -5    0.83    0.20
  13   9  -5    0.45    0.24
  12  -9  -5    0.23    0.18
 -12  -9   5   -0.05    0.17
  12   9  -5    0.22    0.17
  12   9  -5    0.46    0.22
  11  -9  -5    0.78    0.24
 -11  -9   5    0.44    0.20
  11   9  -5    0.88    0.24
  11   9  -5    1.05    0.22
  10  -9  -5    1.28    0.25
 -10  -9   5    0.49    0.21
  10   9  -5    0.78    0.23
 -10   9   5    1.11    0.23
 -10   9   5    1.04    0.20
  10   9  -5    1.11    0.23
   9  -9  -5    0.28    0.18
  -9  -9   5    0.24    0.17
  -9   9   5    0.29    0.13
   9   9  -5    0.18    0.17
   8  -9  -5    1.38    0.24
  -8  -9   5    1.44    0.25
  -8   9   5    1.24    0.17
   8   9  -5    1.04    0.21
   7  -9  -5    3.54    0.31
  -7  -9   5    4.60    0.35
  -7   9   5    3.52    0.25
   7   9  -5    3.76    0.32
  -6  -9   5   -0.02    0.17
   6  -9  -5    0.62    0.20
   6   9  -5    0.29    0.16
  -6   9   5    0.37    0.14
   5  -9  -5    1.37    0.21
  -5  -9   5    1.13    0.22
   5   9  -5    1.35    0.20
  -5   9   5    0.94    0.17
   4  -9  -5    0.24    0.16
  -4  -9   5    0.07    0.15
   4   9  -5    0.48    0.18
  -4   9   5    0.07    0.13
  -3  -9   5    2.13    0.24
   3  -9  -5    1.69    0.22
  -3   9   5    2.02    0.22
   3   9  -5    2.07    0.24
   2  -9  -5    5.09    0.34
  -2  -9   5    5.17    0.34
   2   9  -5    4.48    0.31
  -2   9   5    5.21    0.32
  -1  -9   5    0.71    0.19
   1  -9  -5    0.76    0.18
  -1   9   5    0.69    0.16
   1   9  -5    1.00    0.19
  -1   9   5    1.07    0.21
   0  -9  -5    3.70    0.30
   0  -9   5    3.48    0.29
   0   9  -5    3.39    0.27
   0   9   5    3.39    0.29
   0   9   5    2.90    0.26
   1  -9   5    0.13    0.16
  -1  -9  -5    0.30    0.16
   1   9   5    0.07    0.13
  -1   9  -5    0.09    0.13
   1   9   5    0.19    0.15
   2  -9   5    5.83    0.34
  -2  -9  -5    5.58    0.34
   2   9   5    6.41    0.37
  -2   9  -5    6.21    0.32
   2   9   5    6.18    0.36
  -3  -9  -5    0.79    0.17
   3  -9   5    0.09    0.15
   3   9   5    0.72    0.19
   3   9   5    0.75    0.20
   4  -9   5    0.09    0.15
  -4  -9  -5    0.32    0.16
   4   9   5    0.50    0.17
   4   9   5    0.25    0.15
   5  -9   5    0.34    0.16
  -5  -9  -5    0.46    0.17
   5   9   5    0.79    0.20
   5   9   5    0.73    0.18
  -6  -9  -5    4.00    0.31
   6  -9   5    3.72    0.32
   6   9   5    2.90    0.28
   6   9   5    3.87    0.33
  -7  -9  -5    3.20    0.29
   7  -9   5    2.78    0.27
   7   9   5    2.81    0.28
   7   9   5    3.13    0.31
   8  -9   5    0.27    0.17
  -8  -9  -5    0.53    0.22
   8   9   5    0.35    0.19
   8   9   5    0.31    0.19
   9  -9   5    0.16    0.17
   9   9   5    0.12    0.17
   9   9   5    0.04    0.17
  10  -9   5    0.21    0.18
  10   9   5    0.00    0.17
  10   9   5    0.11    0.17
  11  -9   5    0.44    0.19
  11   9   5    0.00    0.18
  11   9   5    0.29    0.20
  12  -9   5    2.37    0.29
  12   9   5    1.90    0.29
  12   9   5    2.59    0.30
  13  -9   5    0.09    0.19
  13   9   5    0.08    0.18
  13   9   5   -0.02    0.20
  14  -9   5    0.46    0.21
  14   9   5    0.75    0.22
  14   9   5    0.58    0.24
  15  -9   5    0.03    0.20
  15   9   5   -0.03    0.21
  16 -10  -5    0.45    0.26
  16  10  -5   -0.05    0.18
  16  10  -5    0.60    0.29
  15 -10  -5    0.53    0.27
  15  10  -5    1.15    0.31
  15  10  -5    0.65    0.22
  14 -10  -5    0.13    0.22
  14  10  -5    0.45    0.26
  14  10  -5    0.42    0.21
  13 -10  -5    0.18    0.23
  13  10  -5    0.03    0.20
  13  10  -5    0.38    0.22
 -12 -10   5    3.17    0.38
  12 -10  -5    3.67    0.37
  12  10  -5    4.20    0.40
  12  10  -5    3.34    0.33
 -11 -10   5    0.68    0.24
  11 -10  -5    1.09    0.26
  11  10  -5    0.27    0.22
  11  10  -5    0.90    0.23
 -10 -10   5    0.18    0.20
  10 -10  -5    0.05    0.19
  10  10  -5    0.02    0.18
  10  10  -5   -0.06    0.20
  -9 -10   5    2.54    0.31
   9 -10  -5    2.55    0.32
   9  10  -5    2.31    0.29
  -9  10   5    2.46    0.23
   9  10  -5    2.61    0.32
  -8 -10   5    1.19    0.23
   8 -10  -5    1.01    0.24
  -8  10   5    0.99    0.18
   8  10  -5    1.05    0.24
  -7 -10   5    1.13    0.24
   7 -10  -5    1.09    0.22
   7  10  -5    0.15    0.20
  -7  10   5    0.27    0.15
   6 -10  -5    2.31    0.27
  -6 -10   5    2.71    0.31
  -6  10   5    2.72    0.25
   6  10  -5    2.66    0.30
  -5 -10   5    1.01    0.23
   5 -10  -5    0.65    0.19
  -5  10   5    0.62    0.17
   5  10  -5    0.74    0.19
  -4 -10   5    0.09    0.16
   4 -10  -5   -0.12    0.17
   4  10  -5    0.08    0.15
  -4  10   5    0.17    0.15
  -3 -10   5    1.10    0.23
   3 -10  -5    1.00    0.21
  -3  10   5    0.91    0.20
   3  10  -5    1.49    0.23
   2 -10  -5    0.24    0.18
  -2 -10   5    0.25    0.18
   2  10  -5    0.15    0.17
  -2  10   5    0.25    0.17
  -1 -10   5    0.49    0.20
   1 -10  -5    0.48    0.20
  -1  10   5    0.36    0.19
  -1  10   5    0.20    0.15
   1  10  -5    0.68    0.18
   0 -10  -5   -0.13    0.16
   0 -10   5    0.28    0.19
   0  10   5    0.07    0.16
   0  10   5    0.13    0.16
   0  10  -5    0.11    0.15
  -1 -10  -5    0.08    0.14
   1 -10   5    0.28    0.16
   1  10   5    0.06    0.16
   1  10   5   -0.03    0.14
  -1  10  -5   -0.15    0.23
  -2 -10  -5   -0.03    0.15
   2 -10   5    0.01    0.14
   2  10   5    0.05    0.17
   2  10   5   -0.15    0.15
   3 -10   5    0.23    0.17
  -3 -10  -5    0.25    0.16
   3  10   5    0.26    0.17
   3  10   5    0.50    0.20
  -4 -10  -5    1.89    0.26
   4 -10   5    1.76    0.24
   4  10   5    1.59    0.23
   4  10   5    1.87    0.27
   5 -10   5    2.11    0.25
   5  10   5    2.20    0.28
   5  10   5    2.29    0.28
   6 -10   5    0.14    0.18
   6  10   5    0.54    0.19
   6  10   5    0.40    0.20
   7 -10   5    0.85    0.22
   7  10   5    1.11    0.23
   7  10   5    1.00    0.23
   8 -10   5    0.36    0.19
   8  10   5    0.25    0.20
   8  10   5   -0.15    0.17
   9 -10   5    0.69    0.22
   9  10   5    0.84    0.25
   9  10   5    0.90    0.21
  10 -10   5    0.19    0.20
  10  10   5   -0.19    0.17
  10  10   5   -0.17    0.19
  11 -10   5    0.16    0.20
  11  10   5    0.68    0.22
  11  10   5    0.03    0.21
  12 -10   5    0.47    0.22
  12  10   5   -0.03    0.20
  12  10   5    0.31    0.23
  13 -10   5    0.57    0.24
  13  10   5    0.38    0.22
  13  10   5    0.07    0.21
  14 -11  -5    1.44    0.31
  14  11  -5    1.28    0.32
  14  11  -5    0.71    0.24
  13 -11  -5   -0.06    0.23
  13  11  -5   -0.05    0.21
  13  11  -5   -0.14    0.20
  12 -11  -5    2.15    0.35
  12  11  -5    1.50    0.31
  12  11  -5    1.31    0.27
 -11 -11   5    0.46    0.24
  11 -11  -5    0.59    0.25
  11  11  -5    0.34    0.25
  11  11  -5    0.13    0.21
  10 -11  -5    1.11    0.26
 -10 -11   5    1.43    0.28
  10  11  -5    1.20    0.26
  10  11  -5    1.09    0.28
   9 -11  -5    0.02    0.19
  -9 -11   5    0.23    0.22
   9  11  -5    0.05    0.19
   9  11  -5    0.05    0.21
   8 -11  -5    0.45    0.21
  -8 -11   5    0.13    0.18
   8  11  -5    0.24    0.19
   8  11  -5    0.45    0.22
  -8  11   5    0.21    0.15
  -7 -11   5    0.73    0.22
   7 -11  -5    0.60    0.22
  -7  11   5    0.63    0.19
   7  11  -5    0.61    0.21
  -6 -11   5    0.33    0.22
   6 -11  -5    0.31    0.22
  -6  11   5    0.22    0.17
   6  11  -5    0.15    0.20
   5 -11  -5    0.23    0.20
  -5 -11   5    0.18    0.19
  -5  11   5    0.31    0.17
   5  11  -5    0.20    0.21
   4 -11  -5    0.76    0.24
  -4 -11   5    0.97    0.25
  -4  11   5    0.72    0.19
   4  11  -5    0.74    0.22
   3 -11  -5    0.09    0.19
  -3 -11   5    0.11    0.20
  -3  11   5    0.03    0.17
   3  11  -5    0.21    0.18
  -2 -11   5   -0.12    0.19
   2 -11  -5    0.23    0.20
  -2  11   5    0.06    0.17
   2  11  -5    0.13    0.17
  -1 -11   5    0.33    0.19
   1 -11  -5    0.10    0.19
  -1  11   5    0.10    0.17
   1  11  -5    0.20    0.19
   0 -11  -5    0.25    0.18
   0 -11   5    0.71    0.23
   0  11   5    0.63    0.23
   0  11   5    0.48    0.19
   1 -11   5    0.38    0.20
  -1 -11  -5    0.17    0.18
   1  11   5   -0.03    0.17
   1  11   5    0.23    0.18
  -2 -11  -5   -0.21    0.14
   2 -11   5   -0.08    0.16
   2  11   5   -0.12    0.18
   2  11   5   -0.14    0.17
   3 -11   5    0.24    0.20
  -3 -11  -5    0.26    0.21
   3  11   5    0.52    0.21
   3  11   5    0.16    0.20
   4 -11   5    0.77    0.22
   4  11   5    0.95    0.22
   4  11   5    0.89    0.23
   5 -11   5    0.33    0.19
   5  11   5   -0.13    0.19
   5  11   5    0.05    0.17
   6 -11   5   -0.16    0.18
   6  11   5    0.13    0.21
   6  11   5    0.10    0.19
   7 -11   5   -0.26    0.18
   7  11   5    0.03    0.18
   7  11   5   -0.15    0.19
   8 -11   5    0.27    0.21
   8  11   5    0.11    0.18
   8  11   5    0.22    0.21
   9 -11   5    0.00    0.20
   9  11   5    0.30    0.23
   9  11   5   -0.15    0.17
  10 -11   5   -0.04    0.20
  10  11   5   -0.06    0.21
  10  11   5    0.23    0.22
  11 -11   5    0.08    0.22
  11  11   5   -0.09    0.22
  11  11   5   -0.12    0.17
  12 -11   5    0.29    0.23
  12  11   5    0.15    0.25
  12  11   5    0.04    0.35
  12 -12  -5   -0.18    0.23
  12  12  -5   -0.23    0.24
  12  12  -5   -0.16    0.22
  11 -12  -5    0.01    0.24
  11  12  -5   -0.45    0.21
  11  12  -5   -0.20    0.20
  10 -12  -5    0.38    0.24
 -10 -12   5    0.49    0.23
  10  12  -5    0.16    0.24
  10  12  -5    0.00    0.21
   9 -12  -5   -0.08    0.23
  -9 -12   5   -0.25    0.21
   9  12  -5   -0.05    0.22
   9  12  -5    0.16    0.20
  -8 -12   5    0.05    0.23
   8 -12  -5    0.56    0.26
  -8  12   5    0.06    0.24
   8  12  -5   -0.03    0.22
   8  12  -5   -0.05    0.21
   7 -12  -5   -0.39    0.20
  -7 -12   5   -0.20    0.22
  -7  12   5   -0.20    0.16
   7  12  -5   -0.13    0.21
   7  12  -5    0.18    0.23
  -6 -12   5   -0.06    0.22
   6 -12  -5   -0.25    0.21
   6  12  -5   -0.25    0.18
   6  12  -5    0.09    0.20
  -6  12   5   -0.06    0.16
  -5 -12   5    0.38    0.24
   5 -12  -5    0.66    0.24
  -5  12   5   -0.03    0.18
   5  12  -5    0.32    0.20
   4 -12  -5    1.15    0.25
  -4 -12   5    1.38    0.28
   4  12  -5    0.41    0.22
  -4  12   5    1.09    0.23
   3 -12  -5   -0.02    0.20
  -3 -12   5   -0.43    0.20
   3  12  -5   -0.13    0.20
  -3  12   5   -0.26    0.17
  -2 -12   5    0.08    0.19
   2 -12  -5   -0.31    0.19
  -2  12   5    0.05    0.19
   1 -12  -5    0.34    0.20
  -1 -12   5    0.25    0.20
  -1  12   5   -0.03    0.18
   0 -12  -5    0.39    0.22
   0 -12   5    0.48    0.24
   0  12   5    0.14    0.20
  -1 -12  -5    4.60    0.37
   1 -12   5    4.80    0.39
   1  12   5    4.67    0.41
   1  12   5    4.82    0.40
   2 -12   5    0.01    0.20
   2  12   5   -0.02    0.19
   2  12   5   -0.21    0.21
   3 -12   5    0.43    0.23
   3  12   5    0.30    0.20
   3  12   5    0.36    0.23
   4 -12   5   -0.11    0.19
   4  12   5    0.11    0.21
   4  12   5   -0.27    0.20
   5 -12   5   -0.08    0.21
   5  12   5   -0.20    0.20
   5  12   5   -0.13    0.21
   6 -12   5    0.26    0.23
   6  12   5    0.13    0.20
   6  12   5    0.16    0.23
   7 -12   5    1.63    0.30
   7  12   5    1.72    0.31
   7  12   5    1.52    0.31
   8 -12   5    1.80    0.31
   8  12   5    1.58    0.28
   8  12   5    1.69    0.31
   9 -12   5    0.83    0.26
   9  12   5    0.61    0.26
   9  12   5    0.48    0.25
  10 -12   5    0.09    0.24
  10  12   5    0.21    0.23
  -9 -13   5    0.13    0.25
   9 -13  -5    0.27    0.25
   9  13  -5   -0.03    0.22
  -8 -13   5    0.10    0.22
   8 -13  -5    0.14    0.28
   8  13  -5    0.00    0.24
   8  13  -5    0.38    0.29
   7 -13  -5    0.13    0.25
  -7 -13   5   -0.16    0.24
   7  13  -5   -0.37    0.21
  -7  13   5    0.10    0.19
   7  13  -5    0.00    0.24
   6 -13  -5    0.22    0.23
  -6 -13   5    0.04    0.24
  -6  13   5    0.46    0.21
   6  13  -5   -0.09    0.21
   6  13  -5    0.16    0.24
   5 -13  -5    0.10    0.22
  -5 -13   5    0.46    0.27
   5  13  -5    0.28    0.22
  -5  13   5    0.28    0.20
  -4 -13   5   -0.16    0.20
   4 -13  -5    0.21    0.25
   4  13  -5    0.11    0.23
  -4  13   5   -0.17    0.17
   3 -13  -5    0.30    0.24
  -3 -13   5    0.31    0.23
  -3  13   5    0.32    0.21
   3  13  -5    0.12    0.20
   2 -13  -5    2.42    0.34
  -2 -13   5    3.27    0.39
  -2  13   5    2.72    0.33
  -1 -13   5    0.15    0.22
   1 -13  -5    0.33    0.21
  -1  13   5    0.13    0.21
   0 -13   5    1.24    0.27
   0 -13  -5    0.79    0.24
   0  13   5    0.92    0.23
   1 -13   5    0.24    0.25
   1  13   5    0.17    0.24
   1  13   5    0.66    0.24
   2 -13   5    0.52    0.25
   2  13   5    0.55    0.23
   2  13   5    0.13    0.21
   3 -13   5    0.34    0.24
   3  13   5    0.24    0.21
   3  13   5    0.20    0.25
   4 -13   5   -0.12    0.22
   4  13   5   -0.09    0.22
   4  13   5    0.00    0.24
   5 -13   5    1.81    0.33
   5  13   5    2.16    0.33
   5  13   5    2.55    0.36
   6 -13   5    0.04    0.22
   6  13   5    0.04    0.23
   7 -13   5   -0.07    0.23
   7  13   5    0.03    0.26
   5 -14  -5   -0.16    0.26
  -5 -14   5   -0.08    0.24
  -5  14   5    0.26    0.21
  -4 -14   5    1.65    0.34
   4 -14  -5    1.18    0.31
  -4  14   5    1.14    0.26
  -3 -14   5   -0.12    0.26
   3 -14  -5   -0.47    0.24
  -3  14   5    0.03    0.22
  -2 -14   5    2.66    0.38
   2 -14  -5    2.02    0.36
  -2  14   5    1.77    0.32
  -1 -14   5    2.38    0.36
  -1  14   5    2.46    0.35
   1  14  -5    1.76    0.49
   0 -14   5   -0.08    0.26
   0  14   5    0.22    0.26
   0  14  -5   -0.53    0.23
   1 -14   5    0.44    0.28
  -1  14  -5    0.31    0.24
   2 -14   5    0.10    0.26
   2  14   5    0.22    0.26
  -2  14  -5    0.23    0.24
  22   0  -6    0.02    0.24
  21   0  -6    0.19    0.22
  20   0  -6    1.09    0.25
  19   0  -6    0.19    0.19
  18   0  -6    0.05    0.18
  17   0  -6    0.17    0.16
  16   0  -6    2.58    0.26
  15   0  -6   -0.01    0.13
 -15   0   6    0.06    0.12
 -14   0   6    8.33    0.36
  14   0  -6    7.86    0.36
 -13   0   6    0.26    0.13
  13   0  -6    0.05    0.13
  12   0  -6   34.64    0.85
 -12   0   6   33.36    0.83
  12   0  -6   33.04    0.66
  12   0  -6   34.38    0.67
  11   0  -6   -0.05    0.04
  11   0  -6   -0.08    0.10
 -11   0   6    0.03    0.10
  10   0  -6    2.68    0.10
  10   0  -6    2.54    0.19
 -10   0   6    2.33    0.19
   9   0  -6   -0.03    0.09
   9   0  -6    0.01    0.04
  -9   0   6   -0.06    0.09
  -8   0   6    3.31    0.19
   8   0  -6    3.31    0.12
   8   0  -6    3.10    0.18
   7   0  -6   -0.07    0.08
   7   0  -6    0.00    0.05
  -7   0   6   -0.05    0.07
  -6   0   6    2.61    0.15
   6   0  -6    2.87    0.16
   6   0  -6    2.91    0.12
   5   0  -6    0.04    0.07
   5   0  -6   -0.04    0.04
  -5   0   6    0.04    0.07
  -4   0   6    3.51    0.16
  -4   0   6    3.59    0.14
   4   0  -6    3.39    0.15
   4   0  -6    3.55    0.13
  -3   0   6    0.04    0.06
   3   0  -6   -0.02    0.05
  -3   0   6    0.01    0.05
   3   0  -6   -0.03    0.05
  -2   0   6    0.19    0.07
   2   0  -6    0.18    0.06
  -2   0   6    0.09    0.05
   2   0  -6    0.13    0.05
  -2   0   6    0.05    0.05
   1   0  -6   -0.03    0.05
   1   0  -6    0.06    0.04
  -1   0   6    0.05    0.04
  -1   0   6    0.04    0.05
  -1   0   6    0.07    0.06
   0   0  -6  510.85    9.56
   0   0   6  509.12    9.53
   0   0   6  486.57    9.54
   0   0  -6  516.61    9.49
   0   0   6  502.87    9.54
  -1   0  -6   -0.04    0.05
   1   0   6    0.02    0.07
   1   0   6    0.02    0.03
   2   0   6   57.29    1.18
   2   0   6   58.90    1.18
   3   0   6    0.08    0.08
   3   0   6    0.00    0.07
   4   0   6  196.17    3.82
   4   0   6  201.22    3.72
   4   0   6  199.37    3.81
   4   0   6  198.38    3.72
   5   0   6   -0.02    0.03
   5   0   6    0.01    0.07
   5   0   6    0.01    0.08
   5   0   6   -0.02    0.03
   6   0   6   34.80    0.79
   6   0   6   34.86    0.70
   6   0   6   34.73    0.77
   6   0   6   35.59    0.70
   7   0   6    0.03    0.07
   7   0   6   -0.04    0.04
   7   0   6   -0.07    0.04
  -8   0  -6   26.43    0.54
   8   0   6   26.12    0.58
   8   0   6   27.46    0.63
   8   0   6   26.88    0.57
   9   0   6    0.01    0.07
  -9   0  -6   -0.07    0.05
   9   0   6   -0.04    0.05
   9   0   6    0.00    0.06
 -10   0  -6    5.27    0.19
  10   0   6    5.08    0.23
  10   0   6    5.30    0.21
  11   0   6    0.03    0.08
  11   0   6    0.03    0.09
 -11   0  -6   -0.01    0.06
  12   0   6   54.39    1.16
 -12   0  -6   53.75    1.14
  12   0   6   54.39    1.17
 -13   0  -6    0.08    0.09
  13   0   6   -0.07    0.09
  13   0   6   -0.13    0.10
  14   0   6    2.00    0.19
 -14   0  -6    1.58    0.16
  15   0   6    0.07    0.12
 -15   0  -6   -0.03    0.10
 -16   0  -6    0.29    0.12
  16   0   6    0.14    0.13
  17   0   6    0.03    0.13
  18   0   6   -0.05    0.15
  19   0   6    0.09    0.15
  22  -1  -6    0.18    0.24
  22   1  -6    0.80    0.28
  21  -1  -6    0.03    0.22
  21   1  -6    0.12    0.22
  20  -1  -6    0.35    0.22
  20   1  -6   -0.20    0.20
  19  -1  -6    1.53    0.27
  19   1  -6    0.91    0.25
  18  -1  -6    1.09    0.23
  18   1  -6    0.89    0.23
  17  -1  -6    0.05    0.16
  17   1  -6    0.10    0.15
  16  -1  -6    0.18    0.14
  16   1  -6    0.45    0.18
 -15  -1   6    3.64    0.27
  15  -1  -6    3.15    0.28
  15   1  -6    3.58    0.30
 -15   1   6    3.44    0.26
 -14  -1   6    5.44    0.31
  14  -1  -6    5.58    0.33
 -14   1   6    5.89    0.31
  14   1  -6    5.57    0.32
  14   1  -6    6.32    0.20
 -13  -1   6   -0.02    0.12
  13  -1  -6    0.06    0.12
 -13   1   6    0.14    0.12
  13   1  -6    0.00    0.06
  13   1  -6   -0.09    0.13
 -12  -1   6   -0.13    0.10
  12  -1  -6    0.16    0.12
  12   1  -6    0.14    0.06
  12   1  -6    0.11    0.13
 -12   1   6    0.05    0.10
 -11  -1   6   21.56    0.58
  11  -1  -6   21.62    0.60
  11   1  -6   22.42    0.61
 -11   1   6   21.86    0.58
  10  -1  -6   25.91    0.65
 -10  -1   6   24.60    0.64
 -10   1   6   24.17    0.63
  10   1  -6   25.34    0.65
   9  -1  -6  100.92    1.93
   9  -1  -6   99.28    2.06
  -9  -1   6  102.97    2.06
  -9   1   6  101.83    2.06
   9   1  -6  103.16    2.07
  -8  -1   6    5.30    0.23
   8  -1  -6    5.44    0.15
   8  -1  -6    5.42    0.24
   8   1  -6    5.38    0.24
  -8   1   6    5.51    0.24
  -7  -1   6   78.57    1.63
   7  -1  -6   80.10    1.63
   7  -1  -6   80.77    1.54
   7   1  -6   80.70    1.63
  -7   1   6   80.63    1.63
  -6  -1   6    2.44    0.16
   6  -1  -6    2.18    0.10
   6  -1  -6    2.02    0.15
  -6   1   6    2.22    0.11
   6   1  -6    2.35    0.15
  -6   1   6    2.17    0.16
   5  -1  -6   17.33    0.44
  -5  -1   6   17.60    0.44
   5  -1  -6   17.83    0.39
  -5   1   6   17.26    0.44
  -5   1   6   17.66    0.39
   5   1  -6   17.54    0.42
   5   1  -6   17.89    0.44
   4  -1  -6   29.26    0.64
   4  -1  -6   30.23    0.62
  -4  -1   6   29.59    0.65
   4   1  -6   29.49    0.63
   4   1  -6   29.75    0.65
  -4   1   6   29.13    0.65
   4   1  -6   29.85    0.63
  -4   1   6   29.16    0.62
   3  -1  -6    0.50    0.07
   3  -1  -6    0.73    0.08
  -3  -1   6    0.49    0.08
   3   1  -6    0.51    0.07
  -3   1   6    0.65    0.08
  -3   1   6    0.65    0.08
   3   1  -6    0.66    0.08
  -2  -1   6   91.48    1.75
   2  -1  -6   90.65    1.76
   2  -1  -6   91.65    1.75
  -2  -1   6   88.83    1.75
  -2   1   6   87.08    1.76
   2   1  -6   91.50    1.77
   2   1  -6   91.75    1.75
   1  -1  -6  146.03    2.78
  -1  -1   6  148.97    2.78
   1  -1  -6  143.86    2.81
  -1  -1   6  144.40    2.78
  -1   1   6  147.17    2.81
  -1   1   6  148.12    2.79
   1   1  -6  146.79    2.81
   1   1  -6  146.07    2.77
   0  -1  -6   21.49    0.44
   0  -1   6   21.79    0.44
   0  -1   6   21.77    0.49
   0   1   6   21.25    0.49
   0   1  -6   21.17    0.49
   0   1  -6   21.07    0.43
  -1  -1  -6   35.49    0.67
   1  -1   6   33.90    0.74
   1  -1   6   35.39    0.67
   1  -1   6   34.55    0.74
  -1  -1  -6   34.43    0.77
   1  -1   6   35.30    0.67
   1   1   6   34.14    0.69
   1   1   6   33.66    0.68
   1   1   6   33.11    0.73
  -1   1  -6   33.60    0.73
   2  -1   6   40.07    0.77
   2  -1   6   39.55    0.85
   2  -1   6   40.55    0.77
   2  -1   6   40.39    0.86
   2   1   6   39.76    0.85
   2   1   6   40.21    0.79
   2   1   6   40.37    0.79
   3  -1   6    0.13    0.09
   3  -1   6    0.29    0.08
   3   1   6    0.22    0.04
   3   1   6    0.12    0.07
   3   1   6    0.17    0.04
   3   1   6    0.20    0.08
   4  -1   6    8.05    0.17
   4  -1   6    7.94    0.26
   4  -1   6    7.93    0.28
   4  -1   6    7.99    0.17
   4   1   6    8.05    0.20
   4   1   6    8.38    0.27
   4   1   6    7.92    0.20
   4   1   6    7.72    0.25
   5  -1   6    2.91    0.09
   5  -1   6    3.12    0.16
   5  -1   6    3.01    0.10
   5  -1   6    3.06    0.19
   5   1   6    3.00    0.11
   5   1   6    3.22    0.17
   5   1   6    2.85    0.11
   5   1   6    3.19    0.16
   6  -1   6    0.19    0.04
   6  -1   6    0.16    0.10
   6  -1   6    0.21    0.08
   6  -1   6    0.20    0.04
   6   1   6    0.12    0.05
   6   1   6    0.25    0.08
   6   1   6    0.16    0.05
   6   1   6    0.34    0.09
   7  -1   6   11.34    0.27
   7  -1   6   11.54    0.33
   7  -1   6   11.28    0.27
   7   1   6   11.47    0.29
   7   1   6   10.83    0.34
   7   1   6   11.34    0.29
   8  -1   6    1.86    0.11
   8  -1   6    1.80    0.11
   8  -1   6    1.74    0.15
   8   1   6    1.64    0.12
  -8   1  -6    1.81    0.08
   8   1   6    1.82    0.15
   8   1   6    1.76    0.11
   9  -1   6    0.21    0.07
  -9  -1  -6    0.09    0.06
   9  -1   6    0.07    0.06
   9  -1   6    0.12    0.08
  -9   1  -6    0.04    0.05
   9   1   6    0.11    0.07
   9   1   6    0.08    0.09
   9   1   6    0.11    0.07
  10  -1   6    0.65    0.11
  10  -1   6    0.48    0.09
 -10  -1  -6    0.56    0.09
 -10   1  -6    0.53    0.08
  10   1   6    0.48    0.10
  10   1   6    0.46    0.11
 -11  -1  -6    0.63    0.10
  11  -1   6    0.71    0.11
  11  -1   6    0.49    0.11
 -11   1  -6    0.57    0.09
  11   1   6    0.89    0.12
  11   1   6    0.71    0.12
 -12  -1  -6    7.33    0.27
  12  -1   6    7.64    0.28
  12  -1   6    7.16    0.27
  12   1   6    6.55    0.28
  12   1   6    6.67    0.28
 -12   1  -6    7.09    0.26
  13  -1   6    0.37    0.12
 -13  -1  -6    0.39    0.11
  13   1   6    0.45    0.12
 -13   1  -6    0.51    0.10
  13   1   6    0.24    0.11
 -14  -1  -6    5.31    0.26
  14  -1   6    5.57    0.27
 -14   1  -6    5.47    0.26
  14   1   6    5.63    0.28
  15  -1   6    1.86    0.19
 -15  -1  -6    1.56    0.17
  15   1   6    1.64    0.19
 -16  -1  -6    0.77    0.15
  16  -1   6    0.94    0.17
  16   1   6    1.05    0.18
  17  -1   6    0.00    0.14
 -17  -1  -6   -0.01    0.12
  17   1   6    0.00    0.14
  18  -1   6    0.11    0.15
 -18  -1  -6   -0.02    0.14
  18   1   6    0.06    0.14
  19  -1   6    0.42    0.18
  19   1   6    0.17    0.16
  22  -2  -6    0.05    0.24
  22   2  -6   -0.16    0.22
  21  -2  -6    0.14    0.22
  21   2  -6   -0.11    0.21
  20  -2  -6    0.19    0.21
  20   2  -6    0.49    0.23
  19  -2  -6    0.19    0.21
  19   2  -6    0.22    0.21
  18  -2  -6    0.06    0.18
  18   2  -6    0.01    0.16
  17  -2  -6    0.18    0.17
  17   2  -6    0.37    0.17
  16  -2  -6    3.27    0.30
  16   2  -6    2.50    0.27
  15  -2  -6    0.17    0.15
 -15  -2   6    0.16    0.14
  15   2  -6    0.13    0.16
 -15   2   6    0.18    0.13
  14  -2  -6    0.06    0.14
 -14  -2   6   -0.04    0.13
 -14   2   6    0.18    0.13
  14   2  -6   -0.05    0.08
  14   2  -6    0.00    0.15
  13  -2  -6    6.53    0.34
 -13  -2   6    6.23    0.31
 -13   2   6    6.21    0.31
  13   2  -6    6.32    0.23
  13   2  -6    7.06    0.35
 -12  -2   6    5.29    0.27
 -12  -2   6    4.56    0.27
  12  -2  -6    5.32    0.28
 -12   2   6    5.09    0.26
  12   2  -6    5.09    0.30
 -11  -2   6   17.48    0.52
 -11  -2   6   17.30    0.49
  11  -2  -6   17.95    0.53
  11   2  -6   16.90    0.52
 -11   2   6   17.66    0.50
 -10  -2   6   -0.01    0.08
  10  -2  -6   -0.06    0.08
 -10  -2   6   -0.06    0.08
  10   2  -6    0.29    0.11
 -10   2   6    0.05    0.09
   9  -2  -6    4.57    0.12
  -9  -2   6    4.32    0.22
  -9  -2   6    4.75    0.21
   9  -2  -6    4.70    0.24
   9   2  -6    4.05    0.22
  -9   2   6    4.35    0.22
   8  -2  -6    1.56    0.15
  -8  -2   6    1.46    0.13
   8  -2  -6    1.60    0.08
  -8  -2   6    1.22    0.13
   8   2  -6    1.37    0.14
  -8   2   6    1.44    0.08
  -8   2   6    1.15    0.13
   7  -2  -6    6.91    0.26
  -7  -2   6    7.29    0.26
  -7  -2   6    7.37    0.25
   7  -2  -6    7.28    0.19
  -7   2   6    7.25    0.26
   7   2  -6    7.02    0.26
  -7   2   6    7.19    0.19
   6  -2  -6    8.50    0.28
   6  -2  -6    8.76    0.23
  -6  -2   6    8.38    0.28
   6   2  -6    8.64    0.28
  -6   2   6    8.74    0.23
  -6   2   6    8.85    0.29
   5  -2  -6    1.26    0.12
   5  -2  -6    1.20    0.09
  -5  -2   6    1.21    0.12
   5   2  -6    1.40    0.12
   5   2  -6    1.45    0.12
  -5   2   6    1.41    0.10
  -5   2   6    1.60    0.13
   4  -2  -6    9.23    0.28
   4  -2  -6    9.03    0.25
  -4  -2   6    8.90    0.27
  -4   2   6    8.89    0.28
   4   2  -6    9.59    0.27
   4   2  -6    8.94    0.26
  -4   2   6    9.21    0.25
  -3  -2   6    5.09    0.18
   3  -2  -6    5.30    0.18
   3  -2  -6    4.86    0.18
   3   2  -6    4.64    0.17
  -3   2   6    4.83    0.17
   3   2  -6    4.93    0.18
   2  -2  -6    1.53    0.11
   2  -2  -6    1.64    0.11
  -2  -2   6    1.67    0.11
  -2   2   6    1.55    0.11
   2   2  -6    1.64    0.09
   2   2  -6    1.67    0.10
   1  -2  -6   89.18    1.72
  -1  -2   6   88.52    1.72
  -1  -2   6   88.81    1.72
   1  -2  -6   88.76    1.75
   1   2  -6   88.44    1.70
   1   2  -6   88.50    1.71
  -1   2   6   88.37    1.75
   0  -2   6    0.56    0.06
   0  -2  -6    0.69    0.07
   0  -2   6    0.51    0.08
   0   2   6    0.67    0.09
   0   2  -6    0.64    0.05
   0   2   6    0.56    0.07
   0   2  -6    0.58    0.06
   0   2   6    0.59    0.08
  -1  -2  -6    1.83    0.10
   1  -2   6    1.98    0.10
   1  -2   6    1.79    0.13
   1   2   6    1.81    0.11
  -1   2  -6    1.97    0.08
   1   2   6    1.89    0.10
   1   2   6    1.94    0.13
   2  -2   6    5.67    0.16
   2  -2   6    5.51    0.16
  -2  -2  -6    5.74    0.16
   2  -2   6    5.48    0.23
   2   2   6    5.45    0.21
   2   2   6    5.88    0.18
   3  -2   6    8.25    0.20
   3  -2   6    8.19    0.20
   3  -2   6    7.92    0.28
  -3  -2  -6    8.57    0.20
   3   2   6    8.07    0.27
   3   2   6    8.28    0.24
   3   2   6    8.37    0.23
   4  -2   6   13.31    0.30
   4  -2   6   13.09    0.38
   4  -2   6   13.04    0.29
   4   2   6   13.30    0.37
   4   2   6   13.30    0.34
   4   2   6   13.34    0.32
   5  -2   6    3.59    0.12
   5  -2   6    3.46    0.21
   5   2   6    3.60    0.17
   5   2   6    3.25    0.15
   5   2   6    3.69    0.18
   6  -2   6    0.08    0.05
   6   2   6    0.14    0.06
   6   2   6    0.00    0.03
   6   2   6   -0.02    0.08
   6   2   6    0.12    0.07
   7  -2   6   14.09    0.34
   7   2   6   14.62    0.41
  -7   2  -6   14.13    0.30
   7   2   6   14.27    0.37
   8  -2   6    7.45    0.23
  -8   2  -6    7.52    0.20
   8   2   6    7.60    0.25
   8   2   6    7.67    0.29
  -9  -2  -6    0.01    0.07
   9  -2   6   -0.08    0.07
   9   2   6    0.07    0.08
  -9   2  -6    0.10    0.05
   9   2   6    0.03    0.09
  10  -2   6    4.08    0.19
 -10  -2  -6    4.07    0.19
 -10   2  -6    4.04    0.17
  10   2   6    4.10    0.23
  10   2   6    4.36    0.21
 -11  -2  -6    0.07    0.08
  11  -2   6   -0.09    0.08
  11   2   6   -0.15    0.09
  11   2   6    0.09    0.10
 -12  -2  -6    0.47    0.11
  12  -2   6    0.45    0.11
  12   2   6    0.43    0.12
  12   2   6    0.27    0.12
 -13  -2  -6    4.90    0.25
  13  -2   6    5.43    0.26
  13   2   6    5.41    0.27
  13   2   6    4.79    0.27
  14  -2   6    0.50    0.13
 -14  -2  -6    0.49    0.12
  14   2   6    0.40    0.13
  14   2   6    0.52    0.14
  15  -2   6    0.15    0.12
 -15  -2  -6    0.03    0.11
  15   2   6    0.11    0.13
  16  -2   6    0.28    0.14
 -16  -2  -6    0.54    0.14
  16   2   6    0.50    0.16
 -17  -2  -6   -0.09    0.12
  17  -2   6    0.27    0.15
  17   2   6    0.46    0.17
 -18  -2  -6    0.76    0.17
  18  -2   6    0.80    0.18
  18   2   6    0.25    0.17
 -19  -2  -6    0.77    0.19
  19  -2   6    1.10    0.20
  19   2   6    0.59    0.19
  21  -3  -6    0.91    0.26
  21   3  -6    1.28    0.28
  20  -3  -6    0.24    0.22
  20   3  -6    0.03    0.20
  19  -3  -6   -0.19    0.18
  19   3  -6   -0.07    0.19
  18  -3  -6    0.20    0.19
  18   3  -6    0.13    0.20
  17  -3  -6    2.84    0.30
  17   3  -6    2.80    0.30
  16  -3  -6    0.22    0.15
  16   3  -6    0.17    0.18
 -15  -3   6    0.27    0.14
 -15  -3   6    0.06    0.14
  15  -3  -6    0.29    0.16
 -15   3   6    0.17    0.16
  15   3  -6    0.03    0.09
  15   3  -6    0.11    0.16
 -14  -3   6    0.28    0.14
  14  -3  -6    0.27    0.15
 -14  -3   6    0.05    0.13
  14   3  -6    0.33    0.10
  14   3  -6    0.28    0.14
 -14   3   6    0.36    0.15
 -13  -3   6   -0.01    0.10
 -13  -3   6   -0.06    0.13
  13  -3  -6   -0.05    0.14
  13   3  -6   -0.09    0.08
  13   3  -6    0.21    0.15
 -13   3   6    0.06    0.13
 -12  -3   6   11.47    0.40
 -12  -3   6   10.19    0.40
  12  -3  -6   11.01    0.42
 -12   3   6   11.53    0.41
  12   3  -6   10.64    0.41
 -11  -3   6    4.28    0.26
 -11  -3   6    4.01    0.24
  11  -3  -6    4.07    0.25
 -11   3   6    4.16    0.25
  11   3  -6    4.29    0.27
  10  -3  -6    0.93    0.15
 -10  -3   6    0.98    0.14
 -10  -3   6    1.16    0.14
  10   3  -6    0.99    0.15
 -10   3   6    1.03    0.15
  -9  -3   6    2.97    0.20
  -9  -3   6    2.92    0.18
   9  -3  -6    2.99    0.21
   9   3  -6    2.91    0.21
  -9   3   6    2.98    0.20
  -9   3   6    2.87    0.10
  -8  -3   6   24.48    0.62
  -8  -3   6   24.43    0.59
   8  -3  -6   23.70    0.61
  -8   3   6   24.06    0.61
   8   3  -6   24.23    0.62
  -8   3   6   24.10    0.51
  -7  -3   6    0.36    0.11
   7  -3  -6    0.42    0.06
   7  -3  -6    0.25    0.10
  -7  -3   6    0.45    0.09
  -7   3   6    0.29    0.06
   7   3  -6    0.41    0.11
  -7   3   6    0.19    0.11
   6  -3  -6    0.04    0.05
  -6  -3   6    0.10    0.09
   6  -3  -6    0.03    0.08
  -6  -3   6    0.02    0.03
  -6   3   6   -0.01    0.06
  -6   3   6    0.08    0.09
   6   3  -6   -0.04    0.08
   5  -3  -6    3.75    0.19
  -5  -3   6    3.04    0.17
   5  -3  -6    3.60    0.15
  -5  -3   6    3.59    0.16
   5   3  -6    3.29    0.17
   5   3  -6    3.38    0.19
  -5   3   6    3.58    0.15
   4  -3  -6    6.70    0.21
  -4  -3   6    6.25    0.23
   4  -3  -6    6.75    0.24
  -4   3   6    6.60    0.21
   4   3  -6    6.56    0.22
   4   3  -6    6.65    0.23
   3  -3  -6    7.65    0.26
   3  -3  -6    7.61    0.25
  -3  -3   6    7.59    0.25
   3   3  -6    7.06    0.24
  -3   3   6    7.27    0.24
   3   3  -6    7.29    0.23
   2  -3  -6    1.69    0.13
  -2  -3   6    1.59    0.13
  -2  -3   6    1.58    0.13
  -2   3   6    1.40    0.12
   2   3  -6    1.44    0.12
   2   3  -6    2.04    0.12
  -1  -3   6    0.31    0.07
  -1  -3   6    0.42    0.09
   1  -3  -6    0.19    0.07
   1   3  -6    0.25    0.06
   1   3  -6    0.30    0.07
  -1   3   6    0.32    0.09
   0  -3   6    3.54    0.16
   0  -3   6    3.63    0.15
   0  -3   6    3.27    0.17
   0  -3  -6    3.31    0.15
   0   3  -6    3.44    0.14
   0   3  -6    3.35    0.13
   0   3   6    3.54    0.17
   0   3   6    3.64    0.17
   1  -3   6    7.61    0.22
   1  -3   6    8.27    0.23
  -1  -3  -6    7.57    0.23
   1  -3   6    8.00    0.27
   1   3   6    7.28    0.26
   1   3   6    7.67    0.24
  -1   3  -6    7.78    0.20
  -1   3  -6    7.41    0.21
  -2  -3  -6    5.73    0.19
   2  -3   6    5.70    0.19
   2  -3   6    5.50    0.23
   2   3   6    5.32    0.20
   2   3   6    5.69    0.23
   2   3   6    5.74    0.21
  -2   3  -6    5.87    0.16
   3  -3   6    1.92    0.16
   3  -3   6    1.80    0.11
  -3  -3  -6    1.56    0.11
   3   3   6    1.74    0.13
  -3   3  -6    1.78    0.09
   3   3   6    1.78    0.15
   3   3   6    1.80    0.12
  -4  -3  -6    1.35    0.10
   4  -3   6    1.47    0.14
   4  -3   6    1.63    0.10
   4  -3   6    1.78    0.11
   4   3   6    1.62    0.11
   4   3   6    1.51    0.12
   4   3   6    1.50    0.13
  -4   3  -6    1.51    0.08
   4   3   6    1.30    0.13
   5  -3   6    0.23    0.06
   5  -3   6    0.08    0.06
  -5  -3  -6    0.21    0.06
   5   3   6    0.15    0.10
   5   3   6    0.22    0.06
   5   3   6    0.24    0.08
   5   3   6    0.16    0.07
   6  -3   6    0.13    0.06
   6  -3   6    0.08    0.06
  -6  -3  -6    0.03    0.05
   6   3   6    0.16    0.08
   6   3   6    0.09    0.07
   6   3   6    0.06    0.09
   6   3   6   -0.01    0.06
   7  -3   6    1.60    0.12
   7   3   6    1.49    0.12
   7   3   6    1.27    0.14
   7   3   6    1.35    0.13
   8  -3   6    0.15    0.08
   8   3   6    0.06    0.09
   8   3   6    0.12    0.09
  -9  -3  -6    0.99    0.11
   9  -3   6    0.86    0.11
   9   3   6    0.98    0.13
   9   3   6    0.88    0.14
 -10  -3  -6    9.72    0.32
  10  -3   6   10.17    0.32
  10   3   6    9.44    0.34
  10   3   6   10.29    0.36
  11  -3   6    8.70    0.31
 -11  -3  -6    9.06    0.32
  11   3   6    8.62    0.35
  11   3   6    9.23    0.34
  12  -3   6   22.25    0.57
 -12  -3  -6   21.47    0.58
  12   3   6   22.68    0.60
  12   3   6   22.26    0.61
  13  -3   6    0.06    0.11
 -13  -3  -6   -0.13    0.09
  13   3   6    0.03    0.12
  13   3   6    0.07    0.12
  14  -3   6    0.21    0.13
 -14  -3  -6    0.27    0.12
  14   3   6    0.21    0.13
  14   3   6    0.01    0.12
 -15  -3  -6    0.55    0.14
  15  -3   6    0.36    0.14
  15   3   6    0.66    0.16
  16  -3   6   -0.01    0.13
 -16  -3  -6   -0.05    0.12
  16   3   6    0.04    0.14
 -17  -3  -6    0.76    0.18
  17  -3   6    0.66    0.17
  17   3   6    0.77    0.19
 -18  -3  -6    0.01    0.15
  18  -3   6   -0.01    0.15
  18   3   6    0.29    0.17
  21  -4  -6    0.16    0.23
  21   4  -6    0.03    0.23
  20  -4  -6    0.43    0.23
  20   4  -6    0.38    0.24
  19  -4  -6    0.94    0.24
  19   4  -6    0.70    0.24
  18  -4  -6    0.08    0.19
  18   4  -6    0.12    0.20
  17  -4  -6    0.95    0.23
  17   4  -6    0.94    0.24
  16  -4  -6    2.22    0.27
  16   4  -6    2.43    0.28
  15  -4  -6    0.32    0.18
 -15  -4   6    0.01    0.14
  15   4  -6    0.09    0.11
  15   4  -6    0.46    0.19
 -14  -4   6    1.74    0.22
  14  -4  -6    1.31    0.20
  14   4  -6    1.11    0.15
 -14   4   6    1.08    0.18
  14   4  -6    1.50    0.22
 -13  -4   6    6.03    0.31
 -13  -4   6    5.76    0.31
  13  -4  -6    5.28    0.33
 -13   4   6    5.85    0.32
  13   4  -6    6.22    0.28
  13   4  -6    6.00    0.35
  12  -4  -6    0.02    0.12
 -12  -4   6    0.16    0.14
 -12  -4   6    0.00    0.11
  12   4  -6   -0.01    0.14
 -12   4   6   -0.05    0.10
 -11  -4   6    4.86    0.26
  11  -4  -6    4.65    0.29
[truncated: 646,443 more chars]
